# Supplementary material for: Genome-wide identification and comparison of legume MLO gene family
Source: PubMed Central journal article supplement (PMC5011691; doi:10.1038/srep32673), 2016-09-06
Supplement: srep32673-s1.pdf [file srep32673-s1.pdf]

## *Supplementary Material*

# **Genome-wide identification and comparison of legume MLO gene family**

**Nicolas Rispail\*, Diego Rubiales**

Institute for Sustainable Agriculture-CSIC, Córdoba, Spain.

\* **Correspondence:** Dr. Nicolas Rispail, Institute for Sustainable Agriculture-CSIC, Avda. Menéndez Pidal s/n, 14004 Córdoba, Spain. Email: [nrispail@ias.csic.es](mailto:nrispail@ias.csic.es)

**Supplementary Table S1.** Characteristics of full length legume *MLO* genes.

| Gene name                  | Contig name             | Transcript                 | Exon        | Chr.      | Dir. | Lenght (kb/aa) |             |            | Protein characteristics |              |
|----------------------------|-------------------------|----------------------------|-------------|-----------|------|----------------|-------------|------------|-------------------------|--------------|
|                            |                         |                            |             |           |      | Genomic        | CDS         | Protein    | pI                      | kDa          |
| <i>Medicago truncatula</i> |                         |                            |             |           |      |                |             |            |                         |              |
| <i>MtMLO1</i>              | Medtr6g033330           |                            | 15          | Chr6      | -    | 5.91           | 1.73        | 574        | 9.18                    | 66.01        |
| <i>MtMLO2</i>              | Medtr5g022400           |                            | 15          | Chr5      | +    | 3.49           | 1.64        | 545        | 8.19                    | 63.11        |
| <i>MtMLO3</i>              | Medtr2g093750           |                            | 14          | Chr2      | +    | 3.24           | 1.78        | 593        | 9.19                    | 67.83        |
| <i>MtMLO4</i>              | Medtr2g028470           |                            | 14          | Chr2      | -    | 4.27           | 1.44        | 479        | 7.89                    | 55.75        |
| <i>MtMLO5</i>              | Medtr3g115960           |                            | 15          | Chr3      | +    | 3.97           | 1.61        | 537        | 7.41                    | 60.75        |
| <i>MtMLO6</i>              | Medtr5g024700           |                            | 15          | Chr5      | +    | 5.09           | 1.70        | 567        | 9.69                    | 64.92        |
| <i>MtMLO7</i>              | Medtr2g006280           |                            | 15          | Chr2      | +    | 4.44           | 1.66        | 551        | 8.15                    | 63.60        |
| <i>MtMLO8</i>              | Medtr3g115940           |                            | 14          | Chr3      | +    | 3.69           | 1.66        | 551        | 9.39                    | 63.49        |
| <i>MtMLO9</i>              | Medtr3g118190           |                            | 12          | Chr3      | +    | 4.12           | 1.55        | 517        | 9.35                    | 58.43        |
| <i>MtMLO10</i>             | Medtr8g073130           |                            | 15          | Chr8      | -    | 6.11           | 1.77        | 588        | 9.04                    | 67.14        |
| <i>MtMLO11</i>             | Medtr4g079140           |                            | 14          | Chr4      | -    | 5.63           | 1.71        | 568        | 7.26                    | 65.31        |
| <i>MtMLO12</i>             | Medtr2g030020           |                            | 5           | Chr2      |      | 1.19           | 0.48        | 159        |                         |              |
| <i>MtMLO13</i>             | Medtr8g010500           |                            | 14          | Chr8      | -    | 3.54           | 1.57        | 522        | 8.35                    | 59.05        |
| <i>MtMLO14</i>             | Medtr8g010530           |                            | 13          | Chr8      | -    | 3.11           | 1.56        | 520        | 9.12                    | 59.41        |
| <i>MtMLO15</i>             | Medtr2g079500           |                            | 15          | Chr2      | -    | 5.17           | 1.65        | 549        | 9.63                    | 62.82        |
| <i>MtMLO16</i>             | Medtr5g009630           |                            | 7           | Chr5      | -    | 5.60           | 0.654       | 217        |                         |              |
|                            |                         |                            | <b>mean</b> | <b>14</b> |      | <b>4.41</b>    | <b>1.65</b> | <b>547</b> | <b>8.70</b>             | <b>62.69</b> |
| <i>Cicer arietinum</i>     |                         |                            |             |           |      |                |             |            |                         |              |
| <i>CaMLO1</i>              | Ca_04814 / LOC101504273 | XM_004500787               | 14          | Ca5       | -    | 2.98           | 1.66        | 553        | 9.63                    | 63.72        |
| <i>CaMLO2</i>              | Ca_23649 / LOC10500098  | XM_004514937               | 15          |           | +    | 7.96           | 1.68        | 559        | 9.57                    | 64.53        |
| <i>CaMLO3</i>              | Ca_04697 / LOC101490933 | XM_004500656, XM_004500657 | 13          | Ca 5      | -    | 3.94           | 1.60        | 533        | 9.44                    | 60.54        |

| Gene name                           | Contig name               | Transcript                                  | Exon      | Chr. | Dir. | Lenght (kb/aa) |             |            | Protein characteristics |              |
|-------------------------------------|---------------------------|---------------------------------------------|-----------|------|------|----------------|-------------|------------|-------------------------|--------------|
|                                     |                           |                                             |           |      |      | Genomic        | CDS         | Protein    | pI                      | kDa          |
| <i>CaMLO4</i>                       | Ca_01959 / LOC101505951   |                                             | 15        | Ca 8 | +    | 4.63           | 1.56        | 518        | 9.78                    | 60.03        |
| <i>CaMLO5</i>                       | Ca_04811 / LOC101503406   | XM_004500784, XM_004500785                  | 15        | Ca5  | -    | 3.40           | 1.75        | 481        | 6.78                    | 65.76        |
| <i>CaMLO6</i>                       | Ca_02517 / LOC101492588   | XM_004487077                                | 15        | Ca1  | -    | 3.40           | 1.77        | 590        | 9.28                    | 67.44        |
| <i>CaMLO7</i>                       | Ca_11758 / LOC101501959   | XM_004510141                                | 13        | Ca7  | -    | 4.33           | 1.54        | 513        | 8.26                    | 58.71        |
| <i>CaMLO8</i>                       | Ca_00046 / LOC101508058   | XM_004485414, XM_004485415                  | 15        | Ca1  | +    | 3.68           | 1.67        | 555        | 8.75                    | 63.95        |
| <i>CaMLO9</i>                       | Ca_11277 / LOC101495573   | XM_004505476                                | 14        | Ca6  | +    | 3.89           | 1.75        | 560        | 7.90                    | 64.65        |
| <i>CaMLO10</i>                      | Ca_10710 / LOC101494654   | XM_004512376                                | 15        | Ca8  | +    | 4.68           | 1.67        | 555        | 9.20                    | 63.51        |
| <i>CaMLO11</i>                      | Ca_06880 / LOC101511064   | XM_004487635                                | 15        | Ca1  | +    | 7.65           | 1.66        | 551        | 9.67                    | 63.06        |
| <i>CaMLO12</i>                      | Ca_09883 / LOC101496809   | XM_004509404                                | 15        | Ca7  | +    | 6.35           | 1.68        | 586        | 9.30                    | 66.87        |
| <i>CaMLO13</i>                      | Ca_07953 / LOC101510624   | XM_004486357                                | 14        | Ca1  | -    | 5.56           | 1.40        | 465        | 7.08                    | 53.86        |
|                                     | Ca_15834                  | gnomon17445181                              | 7         | Ca7  | -    |                |             | 178        |                         |              |
| <b>mean</b>                         |                           |                                             | <b>14</b> |      |      | <b>4.80</b>    | <b>1.65</b> | <b>540</b> | <b>8.82</b>             | <b>62.82</b> |
| <b><i>Pisum sativum</i></b>         |                           |                                             |           |      |      |                |             |            |                         |              |
| <i>PsMLO1</i>                       | FJ463618                  | GAMJ01003109                                |           |      |      |                | 1.72        | 574        | 9.38                    | 65.94        |
| <i>PsMLO2</i>                       |                           | GCMF01001473                                |           |      |      |                | 1.56        | 518        | 9.30                    | 58.58        |
| <i>PsMLO3</i>                       |                           | GAMJ01004855                                |           |      |      |                | 1.76        | 581        | 7.87                    | 66.81        |
| <i>PsMLO4</i>                       |                           | GAMJ01021849,<br>GAMJ01018602,GAMJ01042925  |           |      |      |                | 1.65        | 550        | 9.65                    | 62.73        |
| <b><i>Lupinus angustifolius</i></b> |                           |                                             |           |      |      |                |             |            |                         |              |
| <i>LaMLO1</i>                       | AOCW01137726_AOCW01137727 | GBRP01032299, GBRP01057990,<br>GBRP01055692 | 15        |      | +    | 6.51           | 1.72        | 571        | 8.95                    | 65.84        |
| <i>LaMLO2</i>                       | AOCW01065981_AOCW01147792 | GBRP0101286                                 | 15        |      | -    | 5.98           | 1.72        | 572        | 8.66                    | 65.82        |
| <i>LaMLO3</i>                       | AOCW01159416              |                                             | 15        |      | +    | 4.43           | 1.43        | 474        | 9.27                    | 55.48        |
| <i>LaMLO4</i>                       | AOCW01114694_AOCW01136624 | GBRP01058592, GBRP01073743                  | 15        |      | +    | 8.19           | 1.79        | 597        | 10.22                   | 68.80        |
| <i>LaMLO5</i>                       | AOCW01127929              | GBRP01087504                                | 13        |      | -    | 4.38           | 1.54        | 513        | 7.51                    | 59.54        |
| <i>LaMLO6</i>                       | AOCW01133085              |                                             | 15        |      | -    | 3.91           | 1.55        | 514        | 9.72                    | 58.16        |
| <i>LaMLO7</i>                       | AOCW01138453              | GBRP01046806, GBRP01061917                  | 15        |      | -    | 4.28           | 1.62        | 540        | 8.54                    | 61.01        |
| <i>LaMLO8</i>                       | AOCW01146534              | GBRP01037926                                | 15        |      | -    | 6.26           | 1.78        | 591        | 9.34                    | 66.85        |

| Gene name                   | Contig name                       | Transcript                                             | Exon      | Chr.       | Dir.  | Lenght (kb/aa) |             |            | Protein characteristics |              |
|-----------------------------|-----------------------------------|--------------------------------------------------------|-----------|------------|-------|----------------|-------------|------------|-------------------------|--------------|
|                             |                                   |                                                        |           |            |       | Genomic        | CDS         | Protein    | pI                      | kDa          |
| <i>LaMLO9</i>               | AOCW01154130                      | GBRP01073792, GBRP01080451                             | 15        |            | -     | 5.49           | 1.67        | 554        | 9.99                    | 63.21        |
| <i>LaMLO10</i>              | AOCW01039454_AOCW01039455         |                                                        | 15        |            | -     | 4.87           | 1.74        | 578        | 9.19                    | 66.07        |
| <i>LaMLO11</i>              | AOCW01135152                      | GBRP01069086, GBRP01059884                             | 15        |            | -     | 5.95           | 1.75        | 581        | 8.88                    | 66.05        |
| <i>LaMLO12</i>              | AOCW01152069                      | GBRP01084057, GBRP01089663                             | 15        |            | -     | 4.31           | 1.61        | 537        | 9.08                    | 61.96        |
| <i>LaMLO13</i>              | AOCW01152789                      | GBRP01018422                                           | 13        |            | -     | 3.80           | 1.49        | 497        | 9.37                    | 56.89        |
| <i>LaMLO14</i>              | AOCW01138218                      | GBRP01077588                                           | 13        |            | -     | 6.72           | 1.53        | 510        | 8.23                    | 58.02        |
| <i>LaMLO15</i>              | AOCW01116641                      |                                                        | 15        |            | +     | 5.83           | 1.66        | 552        | 8.85                    | 62.69        |
| <b>mean</b>                 |                                   |                                                        | <b>15</b> |            |       | <b>5.39</b>    | <b>1.64</b> | <b>545</b> | <b>9.05</b>             | <b>62.43</b> |
| <b><i>Arachis spp.</i></b>  |                                   |                                                        |           |            |       |                |             |            |                         |              |
| <i>ArMLO1</i>               | ARADU.27DYI / ARAIP.PW5DF         | GBIP01027541, GBIR01038206                             | 15        | Chr1/Chr10 | -     | 5.53           | 1.71        | 569        | 9.00                    | 63.96        |
| <i>ArMLO2</i>               | ARADU.5Y217/ARAIP.Y3LT4           | GBJG01024432                                           | 13        | Chr2/Chr9  | - / + | 7.26           | 1.52        | 507        | 9.00                    | 58.15        |
| <i>ArMLO3</i>               | ARADU.65SUF/ARAIP.0US16_7B80      | GBIY01009746, GBJL01025099                             | 14        | Chr3       | -     | 7.34           | 1.79        | 594        | 6.45                    | 67.88        |
| <i>ArMLO4</i>               | ARADU.N8G7F/ARAIP.N905Y           | GBJI01054888, GAIG01036165, GBJI01028580, GBIX01019295 | 14        | Chr4       | -     | 3.47           | 1.59        | 504        | 7.36                    | 58.79        |
| <i>ArMLO5</i>               | ARADU.U7W18/ARAIP.Z8ALS           | GBJI01008120                                           | 15        | Chr4       | -     | 3.45           | 1.69        | 563        | 8.30                    | 64.59        |
| <i>ArMLO6</i>               | ARADU.EU0BW/ARAIP.HRR0E           |                                                        | 15        | Chr5       | -     | 3.20           | 1.60        | 533        | 8.59                    | 61.72        |
| <i>ArMLO7</i>               | ARADU.0YR51/ARAIP.SD8AP           | GBJI01054216, GBJI01099636                             | 14        | Chr8/Chr7  | + / - | 3.81           | 1.69        | 561        | 9.75                    | 64.36        |
| <i>ArMLO8</i>               | ARADU.QG7T6/ARAIP.L2HMX           | LN657014                                               | 15        | Chr8/Chr7  | + / - | 3.38           | 1.60        | 531        | 9.67                    | 59.96        |
| <i>ArMLO9</i>               | ARADU.NF3XX_3QT4K/<br>ARAIP.CFV17 | GAER01011659                                           | 14        | Chr8       | +     | 4.74           | 1.61        | 536        | 9.63                    | 61.38        |
| <i>ArMLO10</i>              | ARADU.WJ2TG/ARAIP.N0DTV           | GBJE01045697                                           | 13        | Chr8/Chr7  | -     | 5.20           | 1.55        | 515        | 9.08                    | 58.72        |
| <i>ArMLO11</i>              | ARADU.AK182/ARAIP.SR8Z2           | GBJE01048686                                           | 15        | Chr8       | +     | 5.64           | 1.68        | 558        | 9.12                    | 63.30        |
| <i>ArMLO12</i>              | ARADU.18BQR/ARAIP.WMV74           |                                                        | 13        | Chr9       | -     | 4.09           | 1.51        | 501        | 8.25                    | 57.75        |
| <i>ArMLO13</i>              | ARADU.SSV2N_48N80                 | GBJE01033068, GBIY01021795                             | 15        | Chr4       | -     | 28.05          | 1.68        | 559        | 9.38                    | 63.91        |
| <i>ArMLO14</i>              | ARAIP.MQE1N                       | GBIX01058238, GBJI01167672                             | 17        | Chr9       | +     | 5.29           | 1.54        | 512        | 8.69                    | 58.50        |
| <b>mean</b>                 |                                   |                                                        | <b>14</b> |            |       | <b>6.46</b>    | <b>1.63</b> | <b>539</b> | <b>8.73</b>             | <b>61.64</b> |
| <b><i>Cajanus cajan</i></b> |                                   |                                                        |           |            |       |                |             |            |                         |              |
| <i>CcMLO1</i>               | C.cajan_46346                     | EZ668429, EZ666134                                     | 15        |            | +     | 8.43           | 1.76        | 586        | 8.9                     | 66.92        |
| <i>CcMLO2</i>               | C.cajan_07194                     | EZ630985.,EZ631564                                     | 15        | CcLG02     | -     | 4.69           | 1.76        | 586        | 9.1                     | 67.34        |



| Gene name                        | Contig name      | Transcript                                       | Exon      | Chr.   | Dir. | Lenght (kb/aa) |             |            | Protein characteristics |              |
|----------------------------------|------------------|--------------------------------------------------|-----------|--------|------|----------------|-------------|------------|-------------------------|--------------|
|                                  |                  |                                                  |           |        |      | Genomic        | CDS         | Protein    | pI                      | kDa          |
| <i>CcMLO3</i>                    | C.cajan_32587    |                                                  | 15        |        | -    | 11.51          | 1.68        | 558        | 9.48                    | 63.9         |
| <i>CcMLO4</i>                    | C.cajan_12516    | EZ676746                                         | 15        | CcLG06 | +    | 4.8            | 1.6         | 531        | 9.18                    | 61.13        |
| <i>CcMLO5</i>                    | C.cajan_34110    |                                                  | 15        |        | +    | 5.85           | 1.69        | 562        | 9.66                    | 65.12        |
| <i>CcMLO6</i>                    | C.cajan_34112    | EZ634497                                         | 15        |        | +    | 7.4            | 1.67        | 557        | 10.12                   | 64.50        |
| <i>CcMLO7</i>                    | C.cajan_21483    | EZ636890                                         | 15        | CcLG04 | +    | 6.15           | 1.72        | 572        | 10.07                   | 65.53        |
| <i>CcMLO8</i>                    | C.cajan_16636    | EZ668567,EZ666340, EZ676653                      | 14        | CcLG08 | +    | 5.08           | 1.47        | 489        | 7.81                    | 56.80        |
| <i>CcMLO9</i>                    | C.cajan_01454    | EZ623710, EZ653599, EZ647598, EZ680636, EZ680914 | 15        | CcLG11 | +    | 5.13           | 1.79        | 596        | 9.25                    | 67.9         |
| <i>CcMLO10</i>                   | C.cajan_18941    |                                                  | 15        | CcLG07 | +    | 3.81           | 1.58        | 525        | 8.12                    | 59.76        |
| <i>CcMLO11</i>                   | C.cajan_18939    |                                                  | 14        | CcLG07 | +    | 5.47           | 1.63        | 542        | 9.89                    | 62.35        |
| <i>CcMLO12</i>                   | C.cajan_36621    | EZ682163, EZ633519                               | 15        |        | +    | 5.75           | 1.7         | 567        | 9.03                    | 64.00        |
| <i>CcMLO13</i>                   | C.cajan_17246    |                                                  | 15        | CcLG08 | -    | 4.99           | 1.7         | 562        | 8.52                    | 64.48        |
| <i>CcMLO14</i>                   | C.cajan_23778    | EZ632699, EZ680401                               | 13        |        | +    | 5.28           | 1.54        | 513        | 9.45                    | 57.64        |
| <i>CcMLO15</i>                   | C.cajan_47280    | EZ658204, EZ65806, EZ675970                      | 13        |        | +    | 6.6            | 1.55        | 515        | 8.85                    | 58.48        |
| <i>CcMLO16</i>                   | C.cajan_13783    | EZ671180                                         | 14        | CcLG10 | +    | 7.37           | 1.77        | 573        | 8.28                    | 65.22        |
| <i>CcMLO17</i>                   | C.cajan_37300    | EZ666312, EZ641386, EZ645440                     | 16        |        | +    | 8.28           | 1.66        | 547        | 8.88                    | 63.03        |
| <i>CcMLO18</i>                   | C.cajan_37291    |                                                  | 14        |        | -    | 13.11          | 1.56        | 519        | 7.68                    | 59.92        |
| <i>CcMLO19</i>                   | C.cajan_09813    | EZ665270                                         | 15        | CcLG03 | -    | 6.54           | 1.49        | 495        | 9.33                    | 57.01        |
| <i>CcMLO20</i>                   | C.cajan_24758    |                                                  | 15        |        | -    | 6.16           | 1.55        | 517        | 9.23                    | 59.8         |
| <b>mean</b>                      |                  |                                                  | <b>15</b> |        |      | <b>6.62</b>    | <b>1.63</b> | <b>546</b> | <b>9.04</b>             | <b>62.54</b> |
| <b><i>Phaseolus vulgaris</i></b> |                  |                                                  |           |        |      |                |             |            |                         |              |
| <i>PvMLO1</i>                    | Phvul.001G175900 | GAMK01034684,GAMK01071155, GAMK01015455          | 15        | Chr1   | -    | 10.97          | 1.5         | 498        | 8.3                     | 57.32        |
| <i>PvMLO2</i>                    | Phvul.002G107600 | GAMK01035468                                     | 15        | Chr2   | -    | 4.46           | 1.61        | 534        | 9.55                    | 61.5         |
| <i>PvMLO3</i>                    | Phvul.002G117900 | GAMK01111725,GAMK01012053                        | 15        | Chr2   | -    | 7.16           | 1.82        | 604        | 9.58                    | 68.77        |
| <i>PvMLO4</i>                    | Phvul.003G271300 | GAMK01039073                                     | 15        | Chr3   | -    | 6.04           | 1.73        | 577        | 9.32                    | 65.7         |
| <i>PvMLO5</i>                    | Phvul.004G071700 | GAMK01040872, GAMK01074602                       | 15        | Chr4   | -    | 6.31           | 1.72        | 573        | 8.76                    | 65.19        |

| Gene name                   | Contig name      | Transcript                                                | Exon      | Chr.  | Dir. | Lenght (kb/aa) |             |            | Protein characteristics |              |
|-----------------------------|------------------|-----------------------------------------------------------|-----------|-------|------|----------------|-------------|------------|-------------------------|--------------|
|                             |                  |                                                           |           |       |      | Genomic        | CDS         | Protein    | pI                      | kDa          |
| <i>PvMLO6</i>               | Phvul.004G071800 | GAMK01030163,GAMK01023790,<br>GAMK01048741, GAMK01043348  | 15        | Chr4  | -    | 10.48          | 1.62        | 539        | 10.09                   | 61.5         |
| <i>PvMLO7</i>               | Phvul.005G082500 | GAMK01116174, GAMK01040070,<br>GAMK01095386               | 15        | Chr5  | -    | 16.62          | 1.64        | 544        | 8.98                    | 62.21        |
| <i>PvMLO8</i>               | Phvul.005G136700 | GAMK01048395, GAMK01056244                                | 15        | Chr5  | -    | 4.21           | 1.66        | 551        | 9.67                    | 64.03        |
| <i>PvMLO9</i>               | Phvul.005G136800 | GAMK01065961, GAMK01098978,<br>GAMK01018577               | 15        | Chr5  | -    | 6.1            | 1.68        | 560        | 10.06                   | 65           |
| <i>PvMLO10</i>              | Phvul.006G133800 | GAMK01046431, GAMK01056998                                | 14        | Chr6  | +    | 4.64           | 1.43        | 474        | 7.11                    | 55.79        |
| <i>PvMLO11</i>              | Phvul.006G216900 | GAMK01044295, GAMK01053693,<br>GAMK01061530, GAMK01054071 | 15        | Chr6  | -    | 4.11           | 1.54        | 512        | 9.1                     | 59.07        |
| <i>PvMLO12</i>              | Phvul.007G093600 | GAMK01033253                                              | 15        | Chr7  | +    | 4.95           | 1.67        | 556        | 8.7                     | 63.35        |
| <i>PvMLO13</i>              | Phvul.009G006800 |                                                           | 14        | Chr9  | +    | 3.03           | 1.66        | 551        | 9.85                    | 63.24        |
| <i>PvMLO14</i>              | Phvul.009G007000 | GAMK01055948,GAMK01088610                                 | 15        | Chr9  | +    | 4.33           | 1.65        | 550        | 8.62                    | 61.7         |
| <i>PvMLO15</i>              | Phvul.009G117900 | GAMK01045539, GAMK01119734,<br>GAMK01064264               | 13        | Chr9  | -    | 5.57           | 1.54        | 513        | 9.34                    | 58.01        |
| <i>PvMLO16</i>              | Phvul.010G034400 | GAMK01051424, GAMK01041048,<br>GAMK01109343, GAMK01017151 | 13        | Chr10 | +    | 5.97           | 1.52        | 507        | 8.71                    | 57.98        |
| <i>PvMLO17</i>              | Phvul.011G073800 | GAMK01113404                                              | 15        | Chr11 | +    | 6.42           | 1.7         | 566        | 9.82                    | 64.85        |
| <i>PvMLO18</i>              | Phvul.011G122800 | GAMK01050130, GAMK01040786,<br>GAMK01049351, GAMK01050286 | 14        | Chr11 | +    | 5.15           | 1.72        | 571        | 8.57                    | 65.85        |
| <i>PvMLO19</i>              | Phvul.011G172300 |                                                           | 15        | Chr11 | -    | 9.14           | 1.64        | 545        | 8.98                    | 62.33        |
|                             | Phvul.009G193200 |                                                           | 6         | Chr9  | +    | 4.38           | 0.3         | 99         | 10.15                   | 22.59        |
| <b>mean</b>                 |                  |                                                           | <b>15</b> |       |      | <b>6.61</b>    | <b>1.63</b> | <b>543</b> | <b>9.11</b>             | <b>62.28</b> |
| <b><i>Vigna radiata</i></b> |                  |                                                           |           |       |      |                |             |            |                         |              |
| <i>VrMLO1</i>               | JJMO01000124     | GBXO01007773                                              | 15        | Chr1  | +    | 6.97           | 1.73        | 577        | 9.15                    | 65.93        |
| <i>VrMLO2</i>               | JJMO01000125     | GBXO01030879                                              | 15        | Chr2  | +    | 4.7            | 1.71        | 568        | 9.74                    | 65.08        |
| <i>VrMLO3</i>               | JJMO01000125     | FF394677, FF398548                                        | 14        | Chr2  | +    | 6.3            | 1.81        | 603        | 8.52                    | 69.19        |
| <i>VrMLO4</i>               | JJMO01000126     | GBXO01029476                                              | 15        | Chr3  | -    | 4.78           | 1.48        | 493        | 8.75                    | 56.44        |

| Gene name      | Contig name  | Transcript                                  | Exon        | Chr.      | Dir. | Lenght (kb/aa) |             |            | Protein characteristics |              |
|----------------|--------------|---------------------------------------------|-------------|-----------|------|----------------|-------------|------------|-------------------------|--------------|
|                |              |                                             |             |           |      | Genomic        | CDS         | Protein    | pI                      | kDa          |
| <i>VrMLO5</i>  | JJMO01000120 | GBXO01004030                                | 15          | Chr4      | +    | 4.78           | 1.68        | 560        | 10.02                   | 65.24        |
| <i>VrMLO6</i>  | JJMO01000120 |                                             | 15          | Chr4      | +    | 5.29           | 1.65        | 548        | 9.51                    | 63.61        |
| <i>VrMLO7</i>  | JJMO01000121 | GBX01064970                                 | 14          | Chr5      | +    | 3.11           | 1.67        | 554        | 9.74                    | 63.6         |
| <i>VrMLO8</i>  | JJMO01000121 |                                             | 16          | Chr5      | +    | 3.42           | 1.57        | 522        | 9.41                    | 58.77        |
| <i>VrMLO9</i>  | JJMO01000121 | GBXO01028231, FF546578,<br>FF546738         | 13          | Chr5      | +    | 5.35           | 1.55        | 515        | 8.57                    | 63.75        |
| <i>VrMLO10</i> | JJMO01000123 |                                             | 15          | Chr7      | +    | 5.29           | 1.72        | 573        | 9.2                     | 65.04        |
| <i>VrMLO11</i> | JJMO01000128 | GBXO01035550,GBXO01044502                   | 15          | Chr8      | -    | 4.79           | 1.67        | 554        | 8.25                    | 63.63        |
| <i>VrMLO12</i> | JJMO01000129 | GBXO01048488, GBXO01048759                  | 13          | Chr9      | -    | 5.53           | 1.55        | 514        | 9.13                    | 58.32        |
| <i>VrMLO13</i> | JJMO01000320 | GBXO01033295, GBXO01073055.<br>GBXO01013847 | 15          | Chr10     | -    | 3.97           | 1.68        | 559        | 8.82                    | 63.98        |
| <i>VrMLO14</i> | JJMO01000320 | GBXO01075545                                | 14          | Chr10     | +    | 4.57           | 1.41        | 469        | 7.62                    | 54.5         |
| <i>VrMLO15</i> | JJMO01000319 | GBXO01055350, GBXO01035975                  | 15          | Chr11     | +    | 3.96           | 1.71        | 569        | 9.03                    | 64.74        |
| <i>VrMLO16</i> | JJMO01000319 | GBXO01055546, GBXO01069063                  | 15          | Chr11     | +    | 4.18           | 1.59        | 528        | 9.49                    | 60.93        |
| <i>VrMLO17</i> | JJMO01000831 | GBXO01053704, GBXO01009906                  | 15          |           | +    | 12.95          | 1.56        | 520        | 10.09                   | 59.55        |
| <i>VrMLO18</i> | JJMO01001841 | GBXO01045250                                | 15          |           | -    | 5.96           | 1.64        | 546        | 9.12                    | 62.52        |
|                |              |                                             | <b>mean</b> | <b>15</b> |      | <b>5.33</b>    | <b>1.63</b> | <b>543</b> | <b>9.12</b>             | <b>62.49</b> |

**Supplementary Table S2.** Online prediction servers and tools used for the analysis of legume *MLO* gene family.

| Resources     | Characteristics and purpose                        | Web address                                                                                                                                                                                 | References                     |
|---------------|----------------------------------------------------|---------------------------------------------------------------------------------------------------------------------------------------------------------------------------------------------|--------------------------------|
| Fgenesh       | ab initio gene prediction program                  | <a href="http://www.softberry.com/berry.phtml?topic=index&amp;group=programs&amp;subgroup=gfind">http://www.softberry.com/berry.phtml?topic=index&amp;group=programs&amp;subgroup=gfind</a> | Solovyev et al. <sup>46</sup>  |
| SignalP       | prediction of signal peptide                       | <a href="http://www.cbs.dtu.dk/services/SignalP/">http://www.cbs.dtu.dk/services/SignalP/</a>                                                                                               | Petersen et al. <sup>59</sup>  |
| TMHMM         | prediction of transmembrane domains                | <a href="http://www.cbs.dtu.dk/services/TMHMM/">http://www.cbs.dtu.dk/services/TMHMM/</a>                                                                                                   | Krogh et al. <sup>27</sup>     |
| Psort         | prediction of protein subcellular localisation     | <a href="http://psort.hgc.jp/form.html">http://psort.hgc.jp/form.html</a>                                                                                                                   | Nakai and Horton <sup>28</sup> |
| Plant-mPloc   | prediction of protein subcellular localisation     | <a href="http://www.csbio.sjtu.edu.cn/bioinf/plant-multi/">http://www.csbio.sjtu.edu.cn/bioinf/plant-multi/</a>                                                                             | Chou and Shen <sup>60</sup>    |
| Interproscan5 | Protein domain identification                      | <a href="http://www.ebi.ac.uk/interpro/search/sequence-search">http://www.ebi.ac.uk/interpro/search/sequence-search</a>                                                                     | Jones et al. <sup>29</sup>     |
| IBS           | Illustrator of biological sequences                | <a href="http://ibs.biocuckoo.org/online.php#">http://ibs.biocuckoo.org/online.php#</a>                                                                                                     | Liu et al. <sup>51</sup>       |
| MEME Suite    | Identification of and Scanning for conserved motif | <a href="http://meme-suite.org/index.html">http://meme-suite.org/index.html</a>                                                                                                             | Bailey et al. <sup>30</sup>    |

**Supplementary Table S3.** Protein characteristics and identity score of legume *MLO* with its closest homologues in *M. truncatula* and *A. thaliana*.<sup>a</sup> Subcellular localization as predicted by the web server Psort<sup>28</sup> and Plant-mPloc<sup>60</sup>. mb and PM stand for membrane and Plasma membrane, respectively.<sup>b</sup> Prediction of Signal peptide (SP) as indicated by SignalP<sup>59</sup>. <sup>c</sup> Number of transmembrane domains (TM) as predicted by TMHMM<sup>27</sup> (T), Psort<sup>28</sup>(P) and Interproscan5<sup>29</sup> (I) web servers.

| Gene name                         | Interproscan prediction |             | Subcellular localization <sup>a</sup> |             | SP <sup>b</sup> | TM domain <sup>c</sup> |   |   | Identity with <i>M. truncatula</i> |            |         |               | Identity with <i>A. thaliana</i> |                       |            |                    |               |      |
|-----------------------------------|-------------------------|-------------|---------------------------------------|-------------|-----------------|------------------------|---|---|------------------------------------|------------|---------|---------------|----------------------------------|-----------------------|------------|--------------------|---------------|------|
|                                   | Pfam Ref.               | name        | Psort                                 | Plant-mPloc |                 | T                      | P | I | M. truncatula gene name            | Blastp hit |         | Pair-wise (%) |                                  | A. thaliana gene name | Blastp hit |                    | Pair-wise (%) |      |
|                                   |                         |             |                                       |             |                 |                        |   |   |                                    | Id.        | E-value | Id.           | Sim.                             |                       | Id.        | E-value            | Id.           | Sim. |
| <b><i>Medicago truncatula</i></b> |                         |             |                                       |             |                 |                        |   |   |                                    |            |         |               |                                  |                       |            |                    |               |      |
| <i>MtMLO1</i>                     | PF03094                 | MLO-related | mb                                    | Cell mb     | No              | 8                      | 7 | 7 | Medtr6g033330                      |            |         |               |                                  | <i>AtMLO6</i>         | 63         | 0.0                | 62.4          | 75.8 |
| <i>MtMLO2</i>                     | PF03094                 | MLO-related | PM                                    | Cell mb     | No              | 6                      | 6 | 7 | Medtr5g022400                      |            |         |               |                                  | <i>AtMLO4</i>         | 51         | 1e <sup>-131</sup> | 45.0          | 62.7 |
| <i>MtMLO3</i>                     | PF03094                 | MLO-related | mb                                    | Cell mb     | No              | 7                      | 7 | 7 | Medtr2g093750                      |            |         |               |                                  | <i>AtMLO6</i>         | 56         | 0.0                | 56.1          | 70.4 |
| <i>MtMLO4</i>                     | PF03094                 | MLO-related | mb                                    | Cell mb     | No              | 7                      | 6 | 7 | Medtr2g028470                      |            |         |               |                                  | <i>AtMLO13</i>        | 60         | 1e <sup>-144</sup> | 55.9          | 68.2 |
| <i>MtMLO5</i>                     | PF03094                 | MLO-related | mb                                    | Cell mb     | No              | 7                      | 6 | 7 | Medtr3g115960                      |            |         |               |                                  | <i>AtMLO5</i>         | 57         | 1e <sup>-175</sup> | 57.3          | 71.2 |
| <i>MtMLO6</i>                     | PF03094                 | MLO-related | PM                                    | Cell mb     | Yes             | 8                      | 7 | 7 | Medtr5g024700                      |            |         |               |                                  | <i>AtMLO8</i>         | 58         | 0.0                | 55.6          | 70.4 |
| <i>MtMLO7</i>                     | PF03094                 | MLO-related | PM                                    | Cell mb     | No              | 6                      | 6 | 7 | Medtr2g006280                      |            |         |               |                                  | <i>AtMLO4</i>         | 68         | 0.0                | 64.9          | 78.4 |
| <i>MtMLO8</i>                     | PF03094                 | MLO-related | mb                                    | Cell mb     | No              | 7                      | 7 | 7 | Medtr3g115940                      |            |         |               |                                  | <i>AtMLO12</i>        | 50         | 1e <sup>-150</sup> | 46.5          | 62.0 |
| <i>MtMLO9</i>                     | PF03094                 | MLO-related | PM                                    | Cell mb     | No              | 6                      | 7 | 7 | Medtr3g118190                      |            |         |               |                                  | <i>AtMLO1</i>         | 65         | 0.0                | 66.8          | 75.0 |
| <i>MtMLO10</i>                    | PF03094                 | MLO-related | PM                                    | Cell mb     | Yes             | 8                      | 7 | 7 | Medtr8g073130                      |            |         |               |                                  | <i>AtMLO8</i>         | 56         | 0.0                | 59.9          | 72.7 |
| <i>MtMLO11</i>                    | PF03094                 | MLO-related | mb                                    | Cell mb     | No              | 7                      | 5 | 7 | Medtr4g079140                      |            |         |               |                                  | <i>AtMLO12</i>        | 42         | 1e <sup>-128</sup> | 38.8          | 59.2 |
| <i>MtMLO13</i>                    | PF03094                 | MLO-related | mb                                    | Cell mb     | No              | 7                      | 8 | 7 | Medtr8g010500                      |            |         |               |                                  | <i>AtMLO1</i>         | 60         | 0.0                | 59.9          | 71.1 |
| <i>MtMLO14</i>                    | PF03094                 | MLO-related | mb                                    | Cell mb     | No              | 7                      | 7 | 7 | Medtr8g010530                      |            |         |               |                                  | <i>AtMLO1</i>         | 63         | 0.0                | 63.8          | 75.0 |
| <i>MtMLO15</i>                    | PF03094                 | MLO-related | mb                                    | Cell mb     | No              | 7                      | 7 | 7 | Medtr2g079500                      |            |         |               |                                  | <i>AtMLO11</i>        | 68         | 0.0                | 67.4          | 78.3 |
| <b><i>Cicer arietinum</i></b>     |                         |             |                                       |             |                 |                        |   |   |                                    |            |         |               |                                  |                       |            |                    |               |      |
| <i>CaMLO1</i>                     | PF03094                 | MLO-related | mb                                    | Cell mb     | No              | 7                      | 7 | 7 | Medtr3g115940                      | 91.9       | 0.0     | 91.9          | 95.7                             | <i>AtMLO12</i>        | 49         | 1e <sup>-150</sup> | 47.0          | 62.1 |
| <i>CaMLO2</i>                     | PF03094                 | MLO-related | mb                                    | Cell mb     | No              | 7                      | 7 | 7 | Medtr6g033330                      | 82.7       | 0.0     | 82.3          | 89.4                             | <i>AtMLO6</i>         | 62         | 0.0                | 62.0          | 75.9 |
| <i>CaMLO3</i>                     | PF03094                 | MLO-related | PM                                    | Cell mb     | No              | 6                      | 7 | 7 | Medtr3g118190                      | 83.7       | 0.0     | 81.8          | 87.1                             | <i>AtMLO1</i>         | 71         | 0.0                | 65.0          | 73.5 |
| <i>CaMLO4</i>                     | PF03094                 | MLO-related | mb                                    | Cell mb     | No              | 7                      | 7 | 7 | Medtr5g022400                      | 83.8       | 0.0     | 79.5          | 86.7                             | <i>AtMLO4</i>         | 50         | 1e <sup>-30</sup>  | 44.8          | 61.0 |
| <i>CaMLO5</i>                     | PF03094                 | MLO-related | mb                                    | Nucleus     | No              | 7                      | 6 | 7 | Medtr3g115960                      | 81.0       | 0.0     | 81.1          | 84.7                             | <i>AtMLO5</i>         | 54         | 1e <sup>-173</sup> | 54.1          | 66.3 |
| <i>CaMLO6</i>                     | PF03094                 | MLO-related | mb                                    | Cell mb     | No              | 6                      | 6 | 7 | Medtr2g093750                      | 83.4       | 0.0     | 83.4          | 88.1                             | <i>AtMLO6</i>         | 62         | 0.0                | 56.7          | 71.0 |
| <i>CaMLO7</i>                     | PF03094                 | MLO-related | mb                                    | Cell mb     | No              | 6                      | 8 | 7 | Medtr8g010530                      | 82.1       | 0.0     | 81.2          | 89.4                             | <i>AtMLO1</i>         | 65         | 0.0                | 64.5          | 74.7 |

| Gene name                           | Interproscan prediction |             | Subcellular localization <sup>a</sup> |             | SP <sup>b</sup> | TM domain <sup>c</sup> |   |   | Identity with <i>M. truncatula</i> |            |         |               | Identity with <i>A. thaliana</i> |                       |            |                    |               |      |
|-------------------------------------|-------------------------|-------------|---------------------------------------|-------------|-----------------|------------------------|---|---|------------------------------------|------------|---------|---------------|----------------------------------|-----------------------|------------|--------------------|---------------|------|
|                                     |                         |             |                                       |             |                 |                        |   |   | M. truncatula gene name            | Blastp hit |         | Pair-wise (%) |                                  | A. thaliana gene name | Blastp hit |                    | Pair-wise (%) |      |
|                                     | Pfam Ref.               | name        | Psort                                 | Plant-mPloc |                 | T                      | P | I |                                    | Id.        | E-value | Id.           | Sim.                             |                       | Id.        | E-value            | Id.           | Sim. |
| <i>CaMLO8</i>                       | PF03094                 | MLO-related | PM                                    | cell mb     | No              | 6                      | 6 | 7 | Medtr2g006280                      | 88.7       | 0.0     | 88.3          | 92.3                             | <i>AtMLO4</i>         | 71         | 0.0                | 64.1          | 76.9 |
| <i>CaMLO9</i>                       | PF03094                 | MLO-related | PM                                    | Cell mb     | No              | 8                      | 6 | 7 | Medtr4g079140                      | 76.8       | 0.0     | 75.3          | 82.4                             | <i>AtMLO6</i>         | 44         | 1e <sup>-123</sup> | 38.6          | 58.9 |
| <i>CaMLO10</i>                      | PF03094                 | MLO-related | PM                                    | Cell mb     | No              | 8                      | 6 | 7 | Medtr5g024700                      | 83.7       | 0.0     | 80.8          | 87.0                             | <i>AtMLO8</i>         | 59         | 0.0                | 54.6          | 69.5 |
| <i>CaMLO11</i>                      | PF03094                 | MLO-related | mb                                    | Cell mb     | No              | 7                      | 7 | 7 | Medtr2g079500                      | 90.7       | 0.0     | 90.6          | 93.8                             | <i>AtMLO11</i>        | 69         | 0.0                | 68.5          | 78.9 |
| <i>CaMLO12</i>                      | PF03094                 | MLO-related | PM                                    | Cell mb     | Yes             | 8                      | 7 | 7 | Medtr8g073130                      | 80.8       | 0.0     | 76.9          | 85.3                             | <i>AtMLO8</i>         | 61         | 0.0                | 60.8          | 74.5 |
| <i>CaMLO13</i>                      | PF03094                 | MLO-related | mb                                    | Cell mb     | No              | 7                      | 6 | 7 | Medtr2g028470                      | 82.4       | 0.0     | 74.4          | 81.2                             | <i>AtMLO13</i>        | 57         | 1e <sup>-146</sup> | 56.9          | 69.4 |
| <b><i>Pisum sativum</i></b>         |                         |             |                                       |             |                 |                        |   |   |                                    |            |         |               |                                  |                       |            |                    |               |      |
| <i>PsMLO1</i>                       | PF03094                 | MLO-related | mb                                    | Cell mb     | No              | 8                      | 7 | 7 | Medtr6g03330                       | 83.3       | 0.0     | 83.3          | 91.0                             | <i>AtMLO12</i>        | 64         | 0.0                | 61.2          | 74.2 |
| <i>PsMLO2</i>                       | PF03094                 | MLO-related | PM                                    | Cell mb     | No              | 7                      | 7 | 7 | Medtr3g118190                      | 88.3       | 0.0     | 88.3          | 92.5                             | <i>AtMLO1</i>         | 70         | 0.0                | 66.4          | 74.5 |
| <i>PsMLO3</i>                       | PF03094                 | MLO-related | mb                                    | Cell mb     | No              | 8                      | 6 | 7 | Medtr4g079140                      | 82.5       | 0.0     | 78.9          | 84.1                             | <i>AtMLO6</i>         | 44         | 1e <sup>-124</sup> | 38.6          | 56.4 |
| <i>PsMLO4</i>                       | PF03094                 | MLO-related | mb                                    | Cell mb     | No              | 7                      | 7 | 7 | Medtr2g079500                      | 91.1       | 0.0     | 91.1          | 95.8                             | <i>AtMLO11</i>        | 69         | 0.0                | 68.6          | 79.6 |
| <b><i>Lupinus angustifolius</i></b> |                         |             |                                       |             |                 |                        |   |   |                                    |            |         |               |                                  |                       |            |                    |               |      |
| <i>LaMLO1</i>                       | PF03094                 | MLO-related | mb                                    | Cell mb     | No              | 6                      | 7 | 7 | Medtr6g03330                       | 74.1       | 0.0     | 73.8          | 84.9                             | <i>AtMLO6</i>         | 63         | 0.0                | 62.3          | 76.4 |
| <i>LaMLO2</i>                       | PF03094                 | MLO-related | mb                                    | Cell mb     | No              | 7                      | 7 | 7 | Medtr6g03330                       | 73.2       | 0.0     | 72.9          | 84.1                             | <i>AtMLO6</i>         | 61         | 0.0                | 60.6          | 75.5 |
| <i>LaMLO3</i>                       | PF03094                 | MLO-related | mb                                    | Cell mb     | No              | 7                      | 6 | 7 | Medtr5g022400                      | 76.4       | 0.0     | 66.6          | 75.6                             | <i>AtMLO4</i>         | 50         | 1e <sup>-124</sup> | 40.8          | 55.7 |
| <i>LaMLO4</i>                       | PF03094                 | MLO-related | mb                                    | Cell mb     | No              | 7                      | 6 | 7 | Medtr2g093750                      | 68.2       | 0.0     | 63.9          | 75.5                             | <i>AtMLO6</i>         | 60         | 0.0                | 56.7          | 70.5 |
| <i>LaMLO5</i>                       | PF03094                 | MLO-related | mb                                    | Cell mb     | No              | 7                      | 6 | 7 | Medtr2g028470                      | 66.0       | 0.0     | 63.6          | 71.5                             | <i>AtMLO13</i>        | 55         | 1e <sup>-142</sup> | 52.0          | 64.8 |
| <i>LaMLO6</i>                       | PF03094                 | MLO-related | PM                                    | Cell mb     | No              | 7                      | 6 | 7 | Medtr3g115960                      | 75.4       | 0.0     | 73.1          | 80.1                             | <i>AtMLO5</i>         | 62         | 1e <sup>-167</sup> | 57.4          | 72.3 |
| <i>LaMLO7</i>                       | PF03094                 | MLO-related | PM                                    | Cell mb     | No              | 7                      | 7 | 7 | Medtr3g115960                      | 75.0       | 0.0     | 74.6          | 82.3                             | <i>AtMLO5</i>         | 57         | 1e <sup>-171</sup> | 57.2          | 70.9 |
| <i>LaMLO8</i>                       | PF03094                 | MLO-related | PM                                    | Cell mb     | Yes             | 9                      | 8 | 7 | Medtr5g024700                      | 70.7       | 0.0     | 68.0          | 79.0                             | <i>AtMLO8</i>         | 58         | 0.0                | 56.9          | 71.4 |
| <i>LaMLO9</i>                       | PF03094                 | MLO-related | mb                                    | Cell mb     | Yes             | 9                      | 7 | 7 | Medtr8g073130                      | 69.0       | 0.0     | 65.7          | 76.1                             | <i>AtMLO8</i>         | 60         | 0.0                | 55.4          | 69.0 |
| <i>LaMLO10</i>                      | PF03094                 | MLO-related | mb                                    | Cell mb     | Yes             | 8                      | 7 | 7 | Medtr5g024700                      | 69.1       | 0.0     | 67.2          | 77.4                             | <i>AtMLO8</i>         | 59         | 1e <sup>-177</sup> | 54.9          | 68.9 |
| <i>LaMLO11</i>                      | PF03094                 | MLO-related | PM                                    | Cell mb     | Yes             | 8                      | 7 | 7 | Medtr8g073130                      | 75.6       | 0.0     | 68.9          | 78.1                             | <i>AtMLO8</i>         | 61         | 0.0                | 57.6          | 71.8 |
| <i>LaMLO12</i>                      | PF03094                 | MLO-related | PM                                    | Cell mb     | No              | 6                      | 4 | 7 | Medtr2g006280                      | 79.4       | 0.0     | 78.4          | 85.3                             | <i>AtMLO4</i>         | 67         | 0.0                | 61.0          | 74.5 |
| <i>LaMLO13</i>                      | PF03094                 | MLO-related | PM                                    | Cell mb     | No              | 7                      | 7 | 7 | Medtr3g118190                      | 75.2       | 0.0     | 74.9          | 84.6                             | <i>AtMLO1</i>         | 71         | 0.0                | 66.9          | 76.5 |
| <i>LaMLO14</i>                      | PF03094                 | MLO-related | mb                                    | Cell mb     | No              | 6                      | 7 | 7 | Medtr8g010530                      | 73.0       | 0.0     | 72.2          | 83.7                             | <i>AtMLO1</i>         | 65         | 0.0                | 65.0          | 75.5 |

| Gene name                   | Interproscan prediction |             | Subcellular localization <sup>a</sup> |             | SP <sup>b</sup> | TM domain <sup>c</sup> |   |   | Identity with <i>M. truncatula</i> |            |         |               | Identity with <i>A. thaliana</i> |                       |            |                    |               |      |
|-----------------------------|-------------------------|-------------|---------------------------------------|-------------|-----------------|------------------------|---|---|------------------------------------|------------|---------|---------------|----------------------------------|-----------------------|------------|--------------------|---------------|------|
|                             |                         |             |                                       |             |                 |                        |   |   | M. truncatula gene name            | Blastp hit |         | Pair-wise (%) |                                  | A. thaliana gene name | Blastp hit |                    | Pair-wise (%) |      |
|                             | Pfam Ref.               | name        | Psort                                 | Plant-mPloc |                 | T                      | P | I |                                    | Id.        | E-value | Id.           | Sim.                             |                       | Id.        | E-value            | Id.           | Sim. |
| <i>LaMLO15</i>              | PF03094                 | MLO-related | mb                                    | Cell mb     | No              | 7                      | 7 | 7 | Medtr2g079500                      | 82.6       | 0.0     | 82.4          | 89.6                             | <i>AtMLO11</i>        | 69         | 0.0                | 67.9          | 78.5 |
| <b><i>Arachis spp.</i></b>  |                         |             |                                       |             |                 |                        |   |   |                                    |            |         |               |                                  |                       |            |                    |               |      |
| <i>ArMLO1</i>               | PF03094                 | MLO-related | PM                                    | Cell mb     | Yes             | 8                      | 7 | 7 | Medtr8g073130                      | 73.0       | 0.0     | 66.9          | 77.3                             | <i>AtMLO8</i>         | 63         | 0.0                | 58.6          | 70.7 |
| <i>ArMLO2</i>               | PF03094                 | MLO-related | mb                                    | Cell mb     | No              | 7                      | 7 | 7 | Medtr8g010530                      | 72.5       | 0.0     | 71.1          | 82.2                             | <i>AtMLO1</i>         | 69         | 0.0                | 65.9          | 74.5 |
| <i>ArMLO3</i>               | PF03094                 | MLO-related | mb                                    | Cell mb     | No              | 7                      | 6 | 7 | Medtr4g079140.                     | 60.7       | 0.0     | 59.9          | 72.0                             | <i>AtMLO6</i>         | 41         | 1e <sup>-124</sup> | 39.3          | 57.1 |
| <i>ArMLO4</i>               | PF03094                 | MLO-related | mb                                    | Cell mb     | No              | 6                      | 6 | 7 | Medtr2g028470                      | 67.4       | 0.0     | 63.9          | 73.8                             | <i>AtMLO13</i>        | 56         | 1e <sup>-152</sup> | 54.1          | 67.2 |
| <i>ArMLO5</i>               | PF03094                 | MLO-related | mb                                    | Cell mb     | No              | 6                      | 7 | 7 | Medtr2g006280                      | 82.3       | 0.0     | 82.0          | 88.0                             | <i>AtMLO4</i>         | 66         | 0.0                | 66.6          | 80.0 |
| <i>ArMLO6</i>               | PF03094                 | MLO-related | PM                                    | Cell mb     | No              | 7                      | 7 | 7 | Medtr5g022400                      | 73.5       | 0.0     | 73.7          | 84.0                             | <i>AtMLO4</i>         | 50         | 1e <sup>-125</sup> | 44.0          | 60.3 |
| <i>ArMLO7</i>               | PF03094                 | MLO-related | mb                                    | Cell mb     | No              | 7                      | 6 | 7 | Medtr3g115940                      | 74.1       | 0.0     | 74.6          | 84.5                             | <i>AtMLO12</i>        | 51         | 1e <sup>-155</sup> | 47.5          | 65.0 |
| <i>ArMLO8</i>               | PF03094                 | MLO-related | mb                                    | Cell mb     | No              | 7                      | 7 | 7 | Medtr3g115960                      | 72.6       | 0.0     | 72.7          | 80.3                             | <i>AtMLO5</i>         | 56         | 1e <sup>-169</sup> | 57.4          | 69.8 |
| <i>ArMLO9</i>               | PF03094                 | MLO-related | PM                                    | Cell mb     | No              | 7                      | 7 | 7 | Medtr2g093750                      | 63.4       | 0.0     | 61.3          | 73.4                             | <i>AtMLO6</i>         | 56         | 1e <sup>-177</sup> | 54.4          | 68.3 |
| <i>ArMLO10</i>              | PF03094                 | MLO-related | mb                                    | Cell mb     | No              | 7                      | 7 | 7 | Medtr3g118190                      | 79.6       | 0.0     | 79.0          | 85.9                             | <i>AtMLO1</i>         | 71         | 0.0                | 66.6          | 74.5 |
| <i>ArMLO11</i>              | PF03094                 | MLO-related | mb                                    | Cell mb     | No              | 6                      | 7 | 7 | Medtr2g079500                      | 84.0       | 0.0     | 84.0          | 90.6                             | <i>AtMLO11</i>        | 71         | 0.0                | 69.2          | 79.6 |
| <i>ArMLO12</i>              | PF03094                 | MLO-related | mb                                    | Cell mb     | No              | 7                      | 7 | 7 | Medtr8g010530                      | 63.5       | 0.0     | 62.4          | 76.8                             | <i>AtMLO1</i>         | 63         | 1e <sup>-177</sup> | 59.0          | 71.1 |
| <i>ArMLO13</i>              | PF03094                 | MLO-related | mb                                    | Cell mb     | No              | 5                      | 6 | 7 | Medtr6g033330                      | 69.7       | 0.0     | 68.5          | 81.6                             | <i>AtMLO6</i>         | 60         | 0.0                | 59.6          | 74.2 |
| <i>ArMLO14</i>              | PF03094                 | MLO-related | mb                                    | Cell mb     | No              | 6                      | 7 | 7 | Medtr2g079500                      | 80.6       | 0.0     | 74.7          | 82.3                             | <i>AtMLO11</i>        | 70         | 0.0                | 63.6          | 74.9 |
| <b><i>Cajanus cajan</i></b> |                         |             |                                       |             |                 |                        |   |   |                                    |            |         |               |                                  |                       |            |                    |               |      |
| <i>CcMLO1</i>               | PF03094                 | MLO-related | mb                                    | Cell Mb     | No              | 6                      | 7 | 7 | Medtr6g033330                      | 74.0       | 0.0     | 73.0          | 84.1                             | <i>AtMLO12</i>        | 62         | 0.0                | 61.1          | 72.8 |
| <i>CcMLO2</i>               | PF03094                 | MLO-related | PM                                    | Cell Mb     | No              | 7                      | 7 | 7 | Medtr6g033330                      | 62.3       | 0.0     | 62.0          | 74.6                             | <i>AtMLO6</i>         | 56         | 0.0                | 56.0          | 68.9 |
| <i>CcMLO3</i>               | PF03094                 | MLO-related | mb                                    | Cell Mb     | No              | 7                      | 6 | 7 | Medtr6g033330                      | 71.1       | 0.0     | 70.4          | 80.3                             | <i>AtMLO12</i>        | 60         | 0.0                | 59.8          | 71.9 |
| <i>CcMLO4</i>               | PF03094                 | MLO-related | PM                                    | Cell Mb     | No              | 7                      | 7 | 7 | Medtr5g022400                      | 76.7       | 0.0     | 76.7          | 85.1                             | <i>AtMLO4</i>         | 51         | 1e <sup>-132</sup> | 44.1          | 60.8 |
| <i>CcMLO5</i>               | PF03094                 | MLO-related | mb                                    | Cell Mb     | No              | 7                      | 6 | 7 | Medtr2g093750                      | 71.4       | 0.0     | 69.2          | 77.6                             | <i>AtMLO6</i>         | 59         | 0.0                | 55.1          | 68.5 |
| <i>CcMLO6</i>               | PF03094                 | MLO-related | mb                                    | Cell Mb     | No              | 7                      | 7 | 7 | Medtr2g093750                      | 70.3       | 0.0     | 67.8          | 76.8                             | <i>AtMLO6</i>         | 57         | 0.0                | 57.8          | 71.5 |
| <i>CcMLO7</i>               | PF03094                 | MLO-related | mb                                    | Cell Mb     | No              | 7                      | 7 | 7 | Medtr2g093750                      | 70.6       | 0.0     | 66.4          | 78.0                             | <i>AtMLO6</i>         | 61         | 0.0                | 58.3          | 73.3 |
| <i>CcMLO8</i>               | PF03094                 | MLO-related | mb                                    | Cell Mb     | No              | 7                      | 7 | 7 | Medtr2g028470                      | 72.3       | 0.0     | 67.2          | 76.7                             | <i>AtMLO13</i>        | 57         | 1e <sup>-145</sup> | 53.7          | 67.5 |
| <i>CcMLO9</i>               | PF03094                 | MLO-related | PM                                    | Cell Mb     | Yes             | 9                      | 7 | 7 | Medtr5g024700                      | 76.6       | 0.0     | 73.7          | 83.4                             | <i>AtMLO8</i>         | 59         | 0.0                | 58.3          | 72.3 |

| Gene name                        | Interproscan prediction |             | Subcellular localization <sup>a</sup> |             | SP <sup>b</sup> | TM domain <sup>c</sup> |   |   | Identity with <i>M. truncatula</i> |            |                    |               | Identity with <i>A. thaliana</i> |                       |            |                    |               |      |
|----------------------------------|-------------------------|-------------|---------------------------------------|-------------|-----------------|------------------------|---|---|------------------------------------|------------|--------------------|---------------|----------------------------------|-----------------------|------------|--------------------|---------------|------|
|                                  |                         |             |                                       |             |                 |                        |   |   | M. truncatula gene name            | Blastp hit |                    | Pair-wise (%) |                                  | A. thaliana gene name | Blastp hit |                    | Pair-wise (%) |      |
|                                  | Pfam Ref.               | name        | Psort                                 | Plant-mPloc |                 | T                      | P | I |                                    | Id.        | E-value            | Id.           | Sim.                             |                       | Id.        | E-value            | Id.           | Sim. |
| <i>CcMLO10</i>                   | PF03094                 | MLO-related | mb                                    | Cell Mb     | No              | 7                      | 6 | 7 | Medtr3g115960                      | 80.6       | 0.0                | 80.7          | 87.2                             | <i>AtMLO5</i>         | 59         | 1e <sup>-180</sup> | 59.6          | 75.2 |
| <i>CcMLO11</i>                   | PF03094                 | MLO-related | mb                                    | Cell Mb     | No              | 7                      | 7 | 7 | Medtr3g115940                      | 79.5       | 0.0                | 79.5          | 88.4                             | <i>AtMLO6</i>         | 49         | 1e <sup>-151</sup> | 46.7          | 66.3 |
| <i>CcMLO12</i>                   | PF03094                 | MLO-related | PM                                    | Cell Mb     | Yes             | 8                      | 7 | 7 | Medtr8g073130                      | 77.3       | 0.0                | 69.1          | 77.2                             | <i>AtMLO8</i>         | 64         | 0.0                | 60.5          | 72.4 |
| <i>CcMLO13</i>                   | PF03094                 | MLO-related | PM                                    | Cell Mb     | No              | 6                      | 6 | 7 | Medtr2g006280                      | 83.6       | 0.0                | 83.4          | 89.2                             | <i>AtMLO4</i>         | 64         | 0.0                | 65.4          | 49.6 |
| <i>CcMLO14</i>                   | PF03094                 | MLO-related | mb                                    | Cell Mb     | No              | 7                      | 7 | 7 | Medtr3g118190                      | 78.1       | 0.0                | 78.8          | 87.2                             | <i>AtMLO1</i>         | 71         | 0.0                | 66.8          | 75.8 |
| <i>CcMLO15</i>                   | PF03094                 | MLO-related | mb                                    | Cell Mb     | No              | 7                      | 7 | 7 | Medtr8g010530                      | 76.6       | 0.0                | 76.2          | 84.8                             | <i>AtMLO1</i>         | 64         | 0.0                | 65.0          | 73.8 |
| <i>CcMLO16</i>                   | PF03094                 | MLO-related | mb                                    | Cell Mb     | No              | 7                      | 5 | 7 | Medtr4g079140                      | 69.0       | 0.0                | 68.2          | 77.9                             | <i>AtMLO12</i>        | 42         | 1e <sup>-130</sup> | 42.4          | 60.4 |
| <i>CcMLO17</i>                   | PF03094                 | MLO-related | mb                                    | Cell Mb     | No              | 7                      | 7 | 7 | Medtr2g079500                      | 86.7       | 0.0                | 86.8          | 92.3                             | <i>AtMLO11</i>        | 71         | 0.0                | 70.7          | 80.6 |
| <i>CcMLO18</i>                   | PF03094                 | MLO-related | mb                                    | Cell Mb     | No              | 6                      | 7 | 7 | Medtr2g079500                      | 60.4       | 0.0                | 59.9          | 71.0                             | <i>AtMLO11</i>        | 55         | 1e <sup>-172</sup> | 55.2          | 67.3 |
| <i>CcMLO19</i>                   | PF03094                 | MLO-related | mb                                    | Cell Mb     | No              | 7                      | 7 | 7 | Medtr6g033330                      | 47.4       | 2e <sup>-257</sup> | 41.6          | 59.2                             | <i>AtMLO3</i>         | 52         | 1e <sup>-135</sup> | 46.3          | 66.2 |
| <i>CcMLO20</i>                   | PF03094                 | MLO-related | PM                                    | Cell Mb     | No              | 6                      | 6 | 7 | Medtr6g033330                      | 50.4       | 3e <sup>-164</sup> | 42.8          | 58.9                             | <i>AtMLO6</i>         | 49         | 1e <sup>-135</sup> | 42.4          | 58.2 |
| <b><i>Phaseolus vulgaris</i></b> |                         |             |                                       |             |                 |                        |   |   |                                    |            |                    |               |                                  |                       |            |                    |               |      |
| <i>PvMLO1</i>                    | PF03094                 | MLO-related | PM                                    | Cell Mb     | No              | 6                      | 7 | 7 | Medtr6g033330                      | 48.3       | 2e <sup>-156</sup> | 40.6          | 59.0                             | <i>AtMLO3</i>         | 49         | 1e <sup>-138</sup> | 47.6          | 66.9 |
| <i>PvMLO2</i>                    | PF03094                 | MLO-related | mb                                    | Cell Mb     | No              | 7                      | 7 | 7 | Medtr5g022400                      | 78.4       | 0.0                | 78.6          | 87.4                             | <i>AtMLO4</i>         | 47         | 1e <sup>-130</sup> | 45.6          | 61.9 |
| <i>PvMLO3</i>                    | PF03094                 | MLO-related | PM                                    | Cell Mb     | Yes             | 9                      | 7 | 7 | Medtr5g024700                      | 71.2       | 0.0                | 68.4          | 78.8                             | <i>AtMLO8</i>         | 61         | 0.0                | 58.3          | 72.2 |
| <i>PvMLO4</i>                    | PF03094                 | MLO-related | PM                                    | Cell Mb     | Yes             | 8                      | 7 | 7 | Medtr8g073130                      | 78.7       | 0.0                | 71.7          | 79.3                             | <i>AtMLO8</i>         | 61         | 0.0                | 60.1          | 73.2 |
| <i>PvMLO5</i>                    | PF03094                 | MLO-related | mb                                    | Cell Mb     | No              | 7                      | 7 | 7 | Medtr6g033330                      | 74.3       | 0.0                | 73.9          | 85.7                             | <i>AtMLO12</i>        | 64         | 0.0                | 64.0          | 75.6 |
| <i>PvMLO6</i>                    | PF03094                 | MLO-related | mb                                    | Cell Mb     | No              | 6                      | 7 | 7 | Medtr6g033330                      | 71.3       | 0.0                | 67.7          | 80.6                             | <i>AtMLO12</i>        | 63         | 0.0                | 58.7          | 71.6 |
| <i>PvMLO7</i>                    | PF03094                 | MLO-related | mb                                    | Cell Mb     | No              | 7                      | 7 | 7 | Medtr2g079500                      | 84.3       | 0.0                | 84.1          | 90.3                             | <i>AtMLO11</i>        | 71         | 0.0                | 69.5          | 79.1 |
| <i>PvMLO8</i>                    | PF03094                 | MLO-related | mb                                    | Cell Mb     | No              | 7                      | 7 | 7 | Medtr2g093750                      | 69.0       | 0.0                | 67.9          | 76.1                             | <i>AtMLO6</i>         | 58         | 0.0                | 57.1          | 70.4 |
| <i>PvMLO9</i>                    | PF03094                 | MLO-related | mb                                    | Cell Mb     | No              | 7                      | 8 | 7 | Medtr2g093750                      | 67.2       | 0.0                | 66.4          | 76.6                             | <i>AtMo6</i>          | 59         | 0.0                | 56.1          | 69.1 |
| <i>PvMLO10</i>                   | PF03094                 | MLO-related | mb                                    | Cell Mb     | No              | 7                      | 6 | 7 | Medtr2g028470                      | 68.5       | 0.0                | 63.2          | 72.9                             | <i>AtMLO13</i>        | 59         | 1e <sup>-142</sup> | 53.3          | 67.3 |
| <i>PvMLO11</i>                   | PF03094                 | MLO-related | mb                                    | Cell Mb     | No              | 6                      | 7 | 7 | Medtr2g006280                      | 82.4       | 0.0                | 76.6          | 83.9                             | <i>AtMLO4</i>         | 71         | 0.0                | 62.3          | 73.8 |
| <i>PvMLO12</i>                   | PF03094                 | MLO-related | PM                                    | Cell Mb     | No              | 6                      | 7 | 7 | Medtr6g033330                      | 60.6       | 0.0                | 59.2          | 72.9                             | <i>AtMLO6</i>         | 55         | 0.0                | 53.3          | 69.3 |
| <i>PvMLO13</i>                   | PF03094                 | MLO-related | mb                                    | Cell Mb     | No              | 7                      | 7 | 7 | Medtr3g115940                      | 80.0       | 0.0                | 78.9          | 87.7                             | <i>AtMLO12</i>        | 48         | 1e <sup>-151</sup> | 45.9          | 62.9 |
| <i>PvMLO14</i>                   | PF03094                 | MLO-related | mb                                    | Cell Mb     | No              | 7                      | 6 | 7 | Medtr3g115960                      | 78.9       | 0.0                | 78.9          | 85.4                             | <i>AtMLO5</i>         | 56         | 1e <sup>-176</sup> | 57.2          | 69.9 |



| Gene name                   | Interproscan prediction |             | Subcellular localization <sup>a</sup> |             | SP <sup>b</sup> | TM domain <sup>c</sup> |   |   | Identity with <i>M. truncatula</i> |            |                    |               | Identity with <i>A. thaliana</i> |                       |            |                    |               |      |
|-----------------------------|-------------------------|-------------|---------------------------------------|-------------|-----------------|------------------------|---|---|------------------------------------|------------|--------------------|---------------|----------------------------------|-----------------------|------------|--------------------|---------------|------|
|                             |                         |             |                                       |             |                 |                        |   |   | M. truncatula gene name            | Blastp hit |                    | Pair-wise (%) |                                  | A. thaliana gene name | Blastp hit |                    | Pair-wise (%) |      |
|                             | Pfam Ref.               | name        | Psort                                 | Plant-mPloc |                 | T                      | P | I |                                    | Id.        | E-value            | Id.           | Sim.                             |                       | Id.        | E-value            | Id.           | Sim. |
| <i>PvMLO15</i>              | PF03094                 | MLO-related | mb                                    | Cell Mb     | No              | 7                      | 7 | 7 | Medtr3g118190                      | 78.8       | 0.0                | 78.5          | 86.0                             | <i>AtMLO1</i>         | 70         | 0.0                | 65.4          | 74.2 |
| <i>PvMLO16</i>              | PF03094                 | MLO-related | mb                                    | Cell Mb     | No              | 7                      | 7 | 7 | Medtr8g010530                      | 75.6       | 0.0                | 74.6          | 84.5                             | <i>AtMLO1</i>         | 69         | 0.0                | 65.4          | 74.7 |
| <i>PvMLO17</i>              | PF03094                 | MLO-related | mb                                    | Cell Mb     | No              | 7                      | 7 | 7 | Medtr2g093750                      | 70.6       | 0.0                | 66.3          | 76.7                             | <i>AtMLO6</i>         | 60         | 0.0                | 59.0          | 72.3 |
| <i>PvMLO18</i>              | PF03094                 | MLO-related | mb                                    | Cell Mb     | No              | 7                      | 5 | 9 | Medtr4g079140                      | 68.7       | 0.0                | 67.0          | 76.9                             | <i>AtMLO12</i>        | 42         | 1e <sup>-127</sup> | 40.7          | 58.4 |
| <i>PvMLO19</i>              | PF03094                 | MLO-related | mb                                    | Cell Mb     | No              | 7                      | 7 | 7 | Medtr2g079500                      | 84.7       | 0.0                | 84.5          | 90.3                             | <i>AtMLO11</i>        | 71         | 0.0                | 69.9          | 79.1 |
| <b><i>Vigna radiata</i></b> |                         |             |                                       |             |                 |                        |   |   |                                    |            |                    |               |                                  |                       |            |                    |               |      |
| <i>VrMLO1</i>               | PF03094                 | MLO-related | mb                                    | Cell mb     | No              | 7                      | 7 | 7 | Medtr6g033330                      | 74.7       | 0.0                | 73.4          | 84.5                             | <i>AtMLO6</i>         | 64         | 0.0                | 62.9          | 76.4 |
| <i>VrMLO2</i>               | PF03094                 | MLO-related | mb                                    | Cell mb     | No              | 7                      | 7 | 7 | Medtr2g093750                      | 69.8       | 0.0                | 66.4          | 76.7                             | <i>AtMLO6</i>         | 60         | 0.0                | 59.3          | 72.2 |
| <i>VrMLO3</i>               | PF03094                 | MLO-related | PM                                    | Cell mb     | No              | 8                      | 5 | 9 | Medtr4g079140                      | 68.5       | 0.0                | 63.4          | 73.4                             | <i>AtMLO12</i>        | 42         | 1e <sup>-127</sup> | 38.3          | 55.7 |
| <i>VrMLO4</i>               | PF03094                 | MLO-related | mb                                    | Cell mb     | No              | 6                      | 7 | 7 | Medtr6g033330                      | 47.8       | 2e <sup>-160</sup> | 42.5          | 59.4                             | <i>AtMLO3</i>         | 52         | 1e <sup>-138</sup> | 45.9          | 65.4 |
| <i>VrMLO5</i>               | PF03094                 | MLO-related | mb                                    | Cell mb     | No              | 7                      | 8 | 9 | Medtr2g093750                      | 67.3       | 0.0                | 66.7          | 75.5                             | <i>AtMLO6</i>         | 58         | 0.0                | 57.5          | 71.4 |
| <i>VrMLO6</i>               | PF03094                 | MLO-related | mb                                    | Cell mb     | No              | 7                      | 6 | 7 | Medtr2g093750                      | 69.1       | 0.0                | 67.9          | 76.8                             | <i>AtMLO6</i>         | 56         | 0.0                | 55.7          | 70.8 |
| <i>VrMLO7</i>               | PF03094                 | MLO-related | mb                                    | Cell mb     | No              | 7                      | 6 | 7 | Medtr3g115940                      | 79.8       | 0.0                | 78.4          | 87.1                             | <i>AtMLO12</i>        | 49         | 1e <sup>-152</sup> | 46.9          | 62.4 |
| <i>VrMLO8</i>               | PF03094                 | MLO-related | mb                                    | Cell mb     | No              | 7                      | 6 | 7 | Medtr3g115960                      | 81.0       | 0.0                | 81.3          | 86.9                             | <i>AtMLO5</i>         | 60         | 1e <sup>-177</sup> | 60.6          | 73.4 |
| <i>VrMLO9</i>               | PF03094                 | MLO-related | mb                                    | Cell mb     | No              | 7                      | 6 | 6 | Medtr3g118190                      | 79.3       | 0.0                | 64.7          | 71.9                             | <i>AtMLO1</i>         | 70         | 0.0                | 53.5          | 60.9 |
| <i>VrMLO10</i>              | PF03094                 | MLO-related | PM                                    | Cell mb     | Yes             | 8                      | 7 | 7 | Medtr8g073130                      | 79.3       | 0.0                | 76.7          | 84.0                             | <i>AtMLO8</i>         | 61         | 0.0                | 60.8          | 74.1 |
| <i>VrMLO11</i>              | PF03094                 | MLO-related | mb                                    | Cell mb     | No              | 7                      | 7 | 7 | Medtr6g033330                      | 64.7       | 0.0                | 63.8          | 75.8                             | <i>AtMLO6</i>         | 56         | 0.0                | 55.1          | 70.9 |
| <i>VrMLO12</i>              | PF03094                 | MLO-related | mb                                    | Cell mb     | No              | 6                      | 7 | 7 | Medtr8g010530                      | 74.8       | 0.0                | 74.1          | 83.7                             | <i>AtMLO1</i>         | 65         | 0.0                | 66.7          | 74.6 |
| <i>VrMLO13</i>              | PF03094                 | MLO-related | mb                                    | Cell mb     | No              | 6                      | 6 | 7 | Medtr2g006280                      | 81.0       | 0.0                | 80.6          | 86.9                             | <i>AtMLO4</i>         | 71         | 0.0                | 42.1          | 61.4 |
| <i>VrMLO14</i>              | PF03094                 | MLO-related | mb                                    | Cell mb     | No              | 7                      | 7 | 7 | Medtr2g028470                      | 69.2       | 0.0                | 63.4          | 73.6                             | <i>AtMLO13</i>        | 59         | 1e <sup>-141</sup> | 53.4          | 67.6 |
| <i>VrMLO15</i>              | PF03094                 | MLO-related | mb                                    | Cell mb     | No              | 8                      | 6 | 7 | Medtr5g024700                      | 73.3       | 0.0                | 68.3          | 78.3                             | <i>AtMLO8</i>         | 60         | 0.0                | 56.2          | 69.9 |
| <i>VrMLO16</i>              | PF03094                 | MLO-related | PM                                    | Cell mb     | No              | 7                      | 7 | 7 | Medtr5g022400                      | 78.4       | 0.0                | 78.5          | 87.0                             | <i>AtMLO4</i>         | 49         | 1e <sup>-130</sup> | 44.9          | 60.8 |
| <i>VrMLO17</i>              | PF03094                 | MLO-related | mb                                    | Cell mb     | No              | 7                      | 7 | 7 | Medtr6g033330                      | 73.6       | 0.0                | 66.8          | 78.8                             | <i>AtMLO12</i>        | 65         | 0.0                | 58.9          | 70.6 |
| <i>VrMLO18</i>              | PF03094                 | MLO-related | mb                                    | Cell mb     | No              | 7                      | 7 | 7 | Medtr2g079500                      | 83.8       | 0.0                | 83.8          | 89.9                             | <i>AtMLO11</i>        | 70         | 0.0                | 68.7          | 78.3 |

**Supplementary Table S4.** Conservation in legume sequences of the 73 amino acids previously found to discriminate between monocot and eudicot powdery mildew susceptibility proteins<sup>18</sup>. The comparison was performed by aligning the monocot and dicot powdery mildew susceptibility proteins as in Appiano *et al.*<sup>18</sup> with the corresponding legume MLO sequences from clades IV and V. Colored residues highlight residue varying between monocot and eudicot plant species (red), between clades (blue) or both (green), respectively.

| Localization              | TM1     |     |     |       |    | EC1   |       |         | TM3   |     |     | IC2 |     |     |     |     |     |     |     |        |     |       |
|---------------------------|---------|-----|-----|-------|----|-------|-------|---------|-------|-----|-----|-----|-----|-----|-----|-----|-----|-----|-----|--------|-----|-------|
| Position in <i>HvMLO1</i> | 13      | 25  | 27  | 28    | 32 | 91    | 96    | 125     | 143   | 145 | 146 | 197 | 198 | 178 | 183 | 184 | 185 | 188 | 189 | 194    | 195 | 197   |
| Monocot (Cl. IV)          | P       | A   | M/I | V/I   | V  | A     | W/L/R | G       | T/L   | S   | V   | A/T | S   | A/S | T   | H   | Q   | V   | K   | G      | L   | S     |
| Legume Cl. IV             | Q/K/E   | A/S | F   | V/I   | V  | A/L   | L     | S       | F/L   | S   | V   | S/T | S   | A/S | T/A | H   | Q   | V   | R/K | G      | W/L | R     |
| Eudicot (Cl. V)           | T/E/D   | F   | L/M | L     | I  | V/I/L | H     | Y       | L/I/F | C   | I   | K/R | T   | E   | A/T | R   | D   | G   | R   | S/N/H/ | W   | Q/K   |
| Legume Cl. V              | T/E/D/Q | F/L | L/M | L/V/I | I  | V/I/A | H/N   | Y/E/D/G | L/I   | C   | I/V | K/R | T/S | E   | A   | R/K | D/E | G   | R/Q | S/N    | W   | Q/K/R |

Supplementary Table S4 (continued)

| Localization              | IC2   |       |         |     |     |       |         |     |       |       | TM4   |     |         |     | EC2 |       |     |     | TM5 |     |     |
|---------------------------|-------|-------|---------|-----|-----|-------|---------|-----|-------|-------|-------|-----|---------|-----|-----|-------|-----|-----|-----|-----|-----|
| Position in <i>HvMLO1</i> | 198   | 200   | 202     | 206 | 225 | 229   | 233     | 234 | 241   | 245   | 250   | 260 | 261     | 267 | 271 | 272   | 273 | 274 | 276 | 278 | 279 |
| Monocot (Cl. IV)          | T     | G     | R       | A   | A/Q | N     | S       | Q   | H     | K     | D     | L   | P       | I   | F   | L     | D   | I   | G   | G   | T   |
| Legume Cl. IV             | M/K   | G     | R       | A   | H   | N     | A       | P   | H/Q   | K     | D     | I/M | P       | I   | L   | L/M/V | N   | V   | K   | Y   | T   |
| Eudicot (Cl. V)           | S/N/T | V/I/F | L/M/I   | C   | H   | M/I   | A/T/P   | P   | R/Q   | Q/S/N | E/K/Q | P   | A/V/T/L | V   | L   | T     | N/T | T/S | G   | Y/H | S   |
| Legume Cl. V              | S/N/T | V/I   | L/M/I/V | C/S | H   | M/T/V | A/T/G/S | P   | R/Q/H | E/Q/K | E/K   | P   | I/V/T/P | V   | L   | T/F/L | N/H | T   | G   | Y/H | S   |

Supplementary Table S4 (continued)

| Localization              | TM5 |     |     |     | IC3 |     |     |     |     |     |     |       |         | TM6 |     |       | EC3   |       |       |       |     |     |
|---------------------------|-----|-----|-----|-----|-----|-----|-----|-----|-----|-----|-----|-------|---------|-----|-----|-------|-------|-------|-------|-------|-----|-----|
| Position in <i>HvMLO1</i> | 280 | 284 | 285 | 291 | 303 | 306 | 308 | 313 | 314 | 325 | 326 | 327   | 335     | 336 | 344 | 352   | 354   | 358   | 360   | 361   | 362 | 366 |
| Monocot (Cl. IV)          | L   | S   | F   | L   | M   | A   | E   | A   | S/T | S   | N   | K     | D       | W   | I/T | M     | H     | T     | A     | T     | P   | K/D |
| Legume Cl. IV             | L   | S   | V   | L   | M   | A   | E/Q | A/T | T   | N   | N   | K     | Q/H     | W   | T/I | I/M   | F     | T     | Y     | E     | F   | S   |
| Eudicot (Cl. V)           | Y   | P   | F   | I   | T/S | G   | R/K | G   | D   | G   | D   | D/H   | R/G     | F/L | V   | L/V   | F     | S     | W/Y/L | E/K/D | F   | S/N |
| Legume Cl. V              | Y   | P   | F   | I/V | T   | G/A | R/K | G   | D/E | G   | D   | E/D/H | R/G/D/H | F/L | V   | L/V/M | F/H/Y | S/T/A | L/Y/F | E/Q/D | F   | S/N |

Supplementary Table S4 (continued)

| Localization              | EC3 |     |     | TM7 | C-TERMINAL |       |     |     |     | CaMBD   |     |     |       |       |       |           |       |
|---------------------------|-----|-----|-----|-----|------------|-------|-----|-----|-----|---------|-----|-----|-------|-------|-------|-----------|-------|
| Position in <i>HvMLO1</i> | 374 | 377 | 378 | 394 | 406        | 409   | 413 | 415 | 416 | 418     | 420 | 421 | 429   | 430   | 431   | 434       | 435   |
| Monocot (Cl. IV)          | L   | M   | K   | F   | N/H        | R/K   | E/D | Q   | T   | K       | M/T | R   | E     | K     | K     | R         | D     |
| Legume Cl. IV             | L   | T/V | R   | F   | H          | R/K   | E   | Q   | T   | K       | K   | Q   | D/E   | K/R   | K/R/T | R         | K     |
| Eudicot (Cl. V)           | D   | I   | R   | L   | T/S/K      | P     | G/N | N/R | V   | T       | K   | H   | K     | R/Q/H | V/T/I | G/N       | R/K   |
| Legume Cl. V              | D/E | I/V | R/K | L   | T/S        | P/A/H | N   | N/R | V/L | T/S/K/E | K/R | H   | K/N/E | N/Q/H | V/K/I | G/N/S/K/R | R/K/D |

**Supplementary Figure S1.** Alignment of *M. truncatula* MLO protein sequences. Alignment was obtained with ClustalW<sup>34</sup> with default parameters. Shading represents amino acid conservation at 90%, 70% and 50% respectively. Red Asterisks on top of the alignment show the 30 highly conserved residues previously detected in MLO sequences<sup>33</sup>. MEME conserved motifs are indicated by numbered horizontal bars on top of the alignment while the transmembrane domains (dashed line) and the CaMBD motif are represented below the alignment. Numbered horizontal bar in red represent the localization of the most significant motifs identified previously by Deskmuth *et al.*<sup>15</sup>.

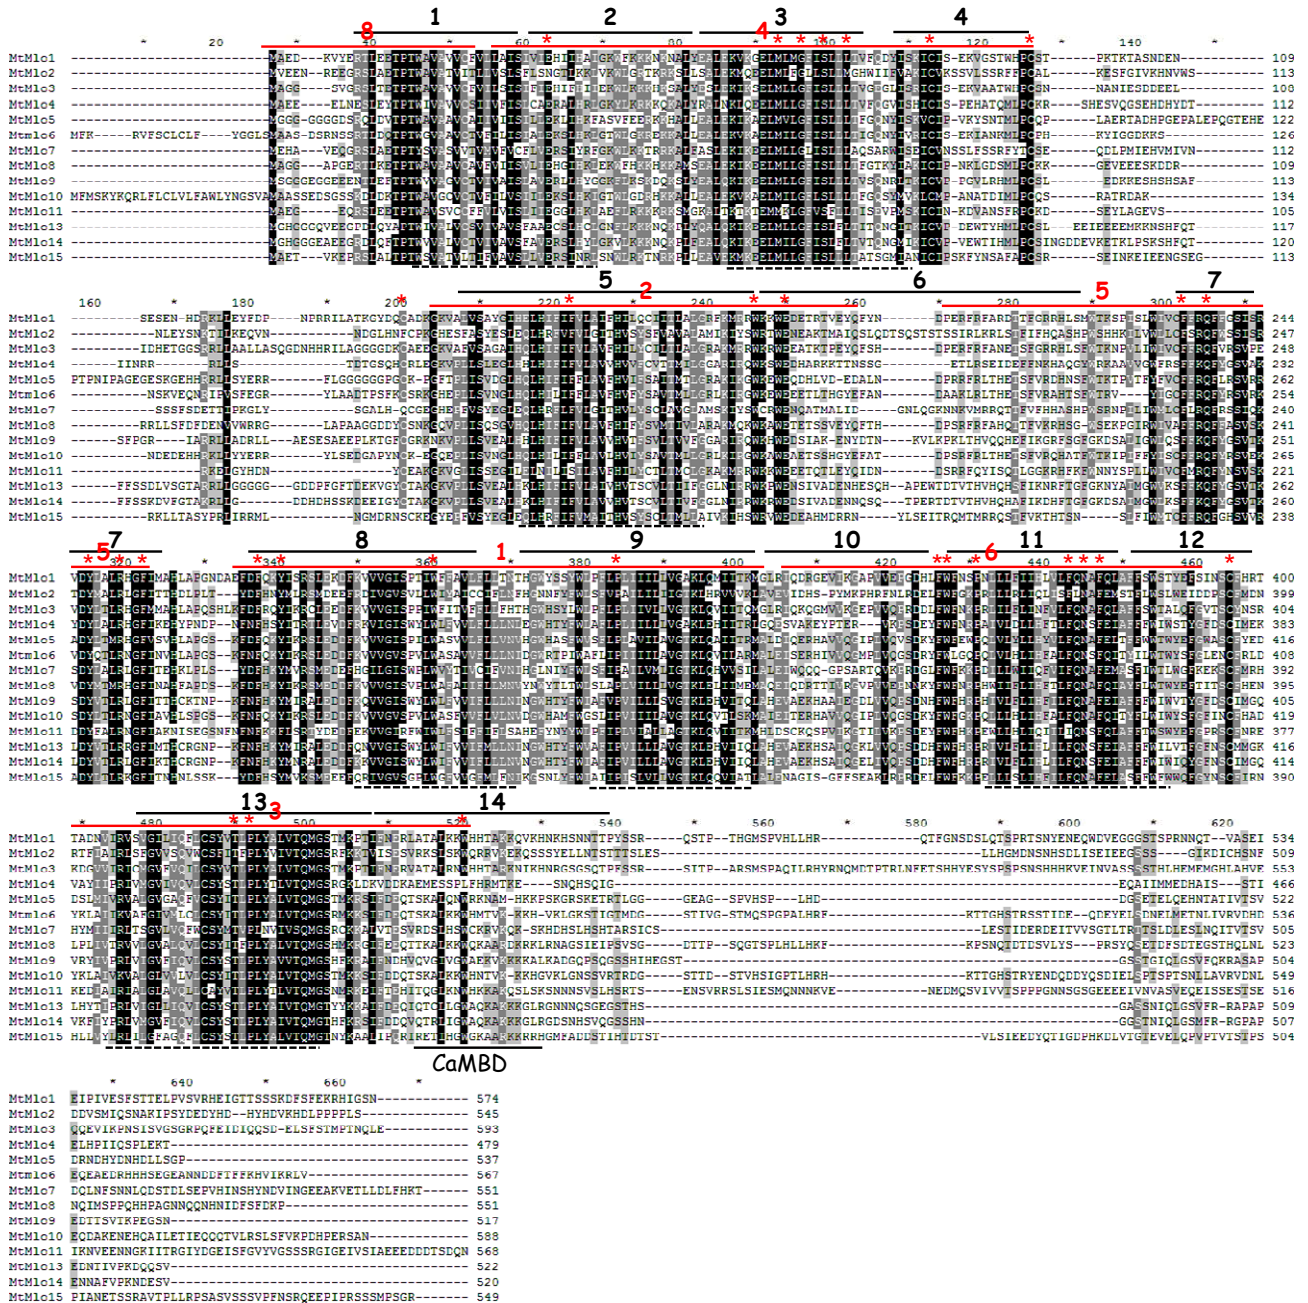

**Supplementary Figure S2.** Phylogenetic relationship of MLO protein sequences. The phylogenetic tree includes all MLO sequences identified in this study with those of *Arabidopsis thaliana*, *Cucumis sativus*, *Solanum lycopersicum*, *Vitis vinifera* and *Hordeum vulgare* (Table 1). The unrooted tree was built with the Neighbor-Joining method on MEGA 6 software<sup>48</sup> and reveals seven well-supported clades. Clade I MLO appears further subdivided in two distinct groups (Ia and Ib). Numbers above branches indicate the percentage of bootstrap replicates supporting this branch. Only bootstrap values higher than 75 are represented.

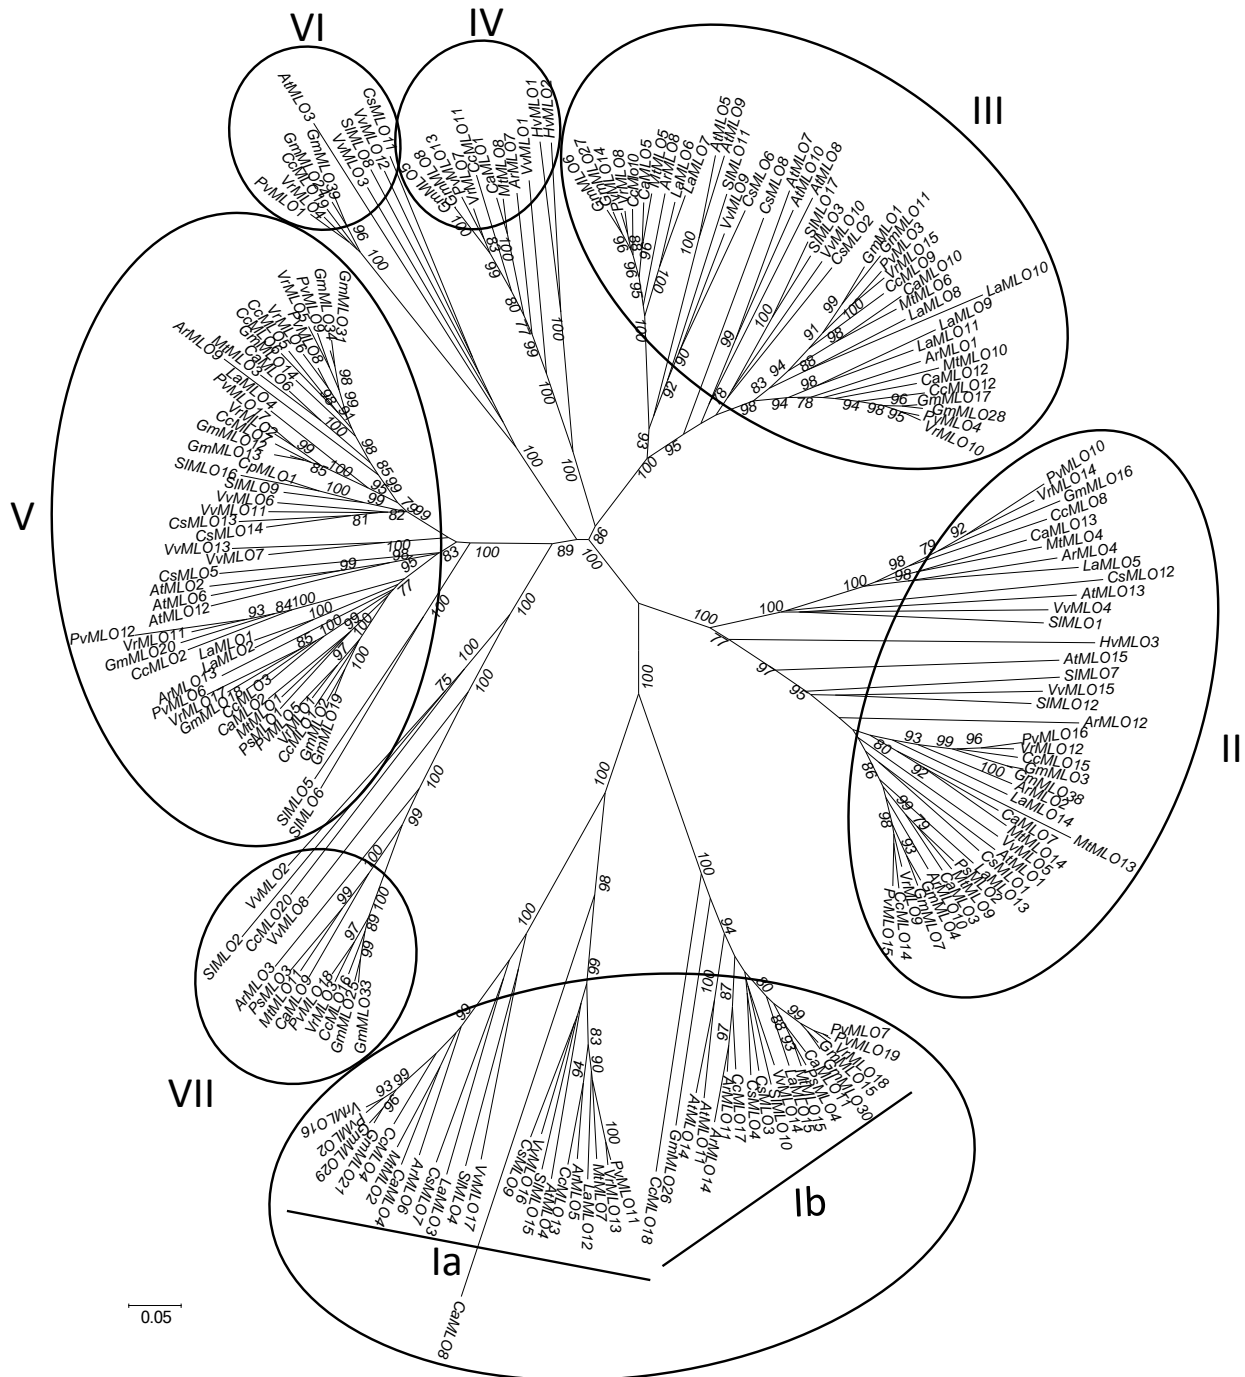



**Supplementary Figure S3.** Alignment of Clade I MLO protein sequences from legume species. Alignment was obtained with ClustalW<sup>34</sup> with default parameters. Shading represents amino acid conservation at 90%, 70% and 50% respectively. MLO-specific motifs are indicated by black horizontal lines. Clade I-specific MEME motifs are shown in red boxes. Transmembrane domains (green dashed lines) and the CaMBD domain (green line) are represented below the alignment. Red asterisks on top of the alignment show the 30 highly conserved residues previously detected in MLO sequences<sup>33</sup>.

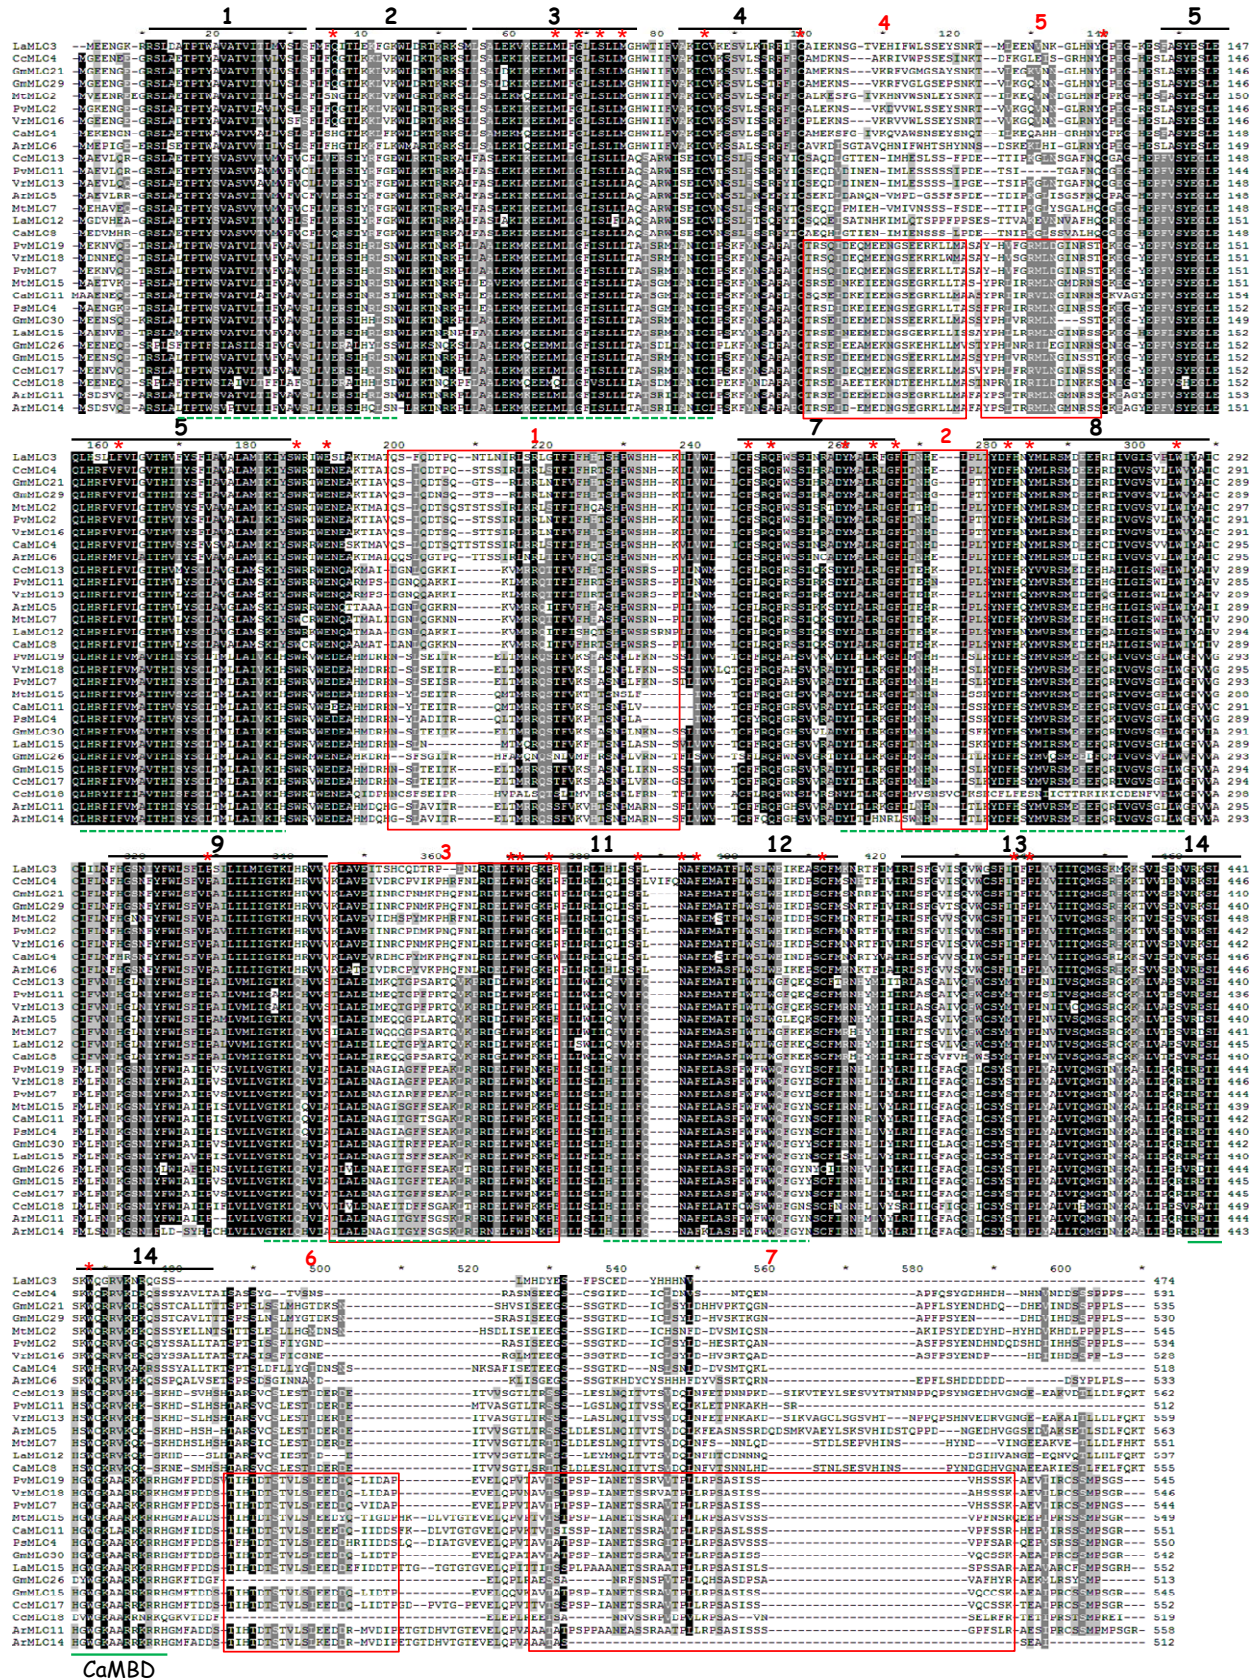



**Supplementary Figure S4.** Alignment of Clade II MLO protein sequences from legume species. Alignment was obtained with ClustalW<sup>34</sup> with default parameters. Shading represents amino acid conservation at 90%, 70% and 50% respectively. MLO-specific motifs are indicated by black horizontal lines. Clade II-specific MEME motifs are shown in red boxes. Transmembrane domains (green dashed lines) and the CaMBD domain (green line) are represented below the alignment. Red asterisks on top of the alignment show the 30 highly conserved residues previously detected in MLO sequences<sup>33</sup>.

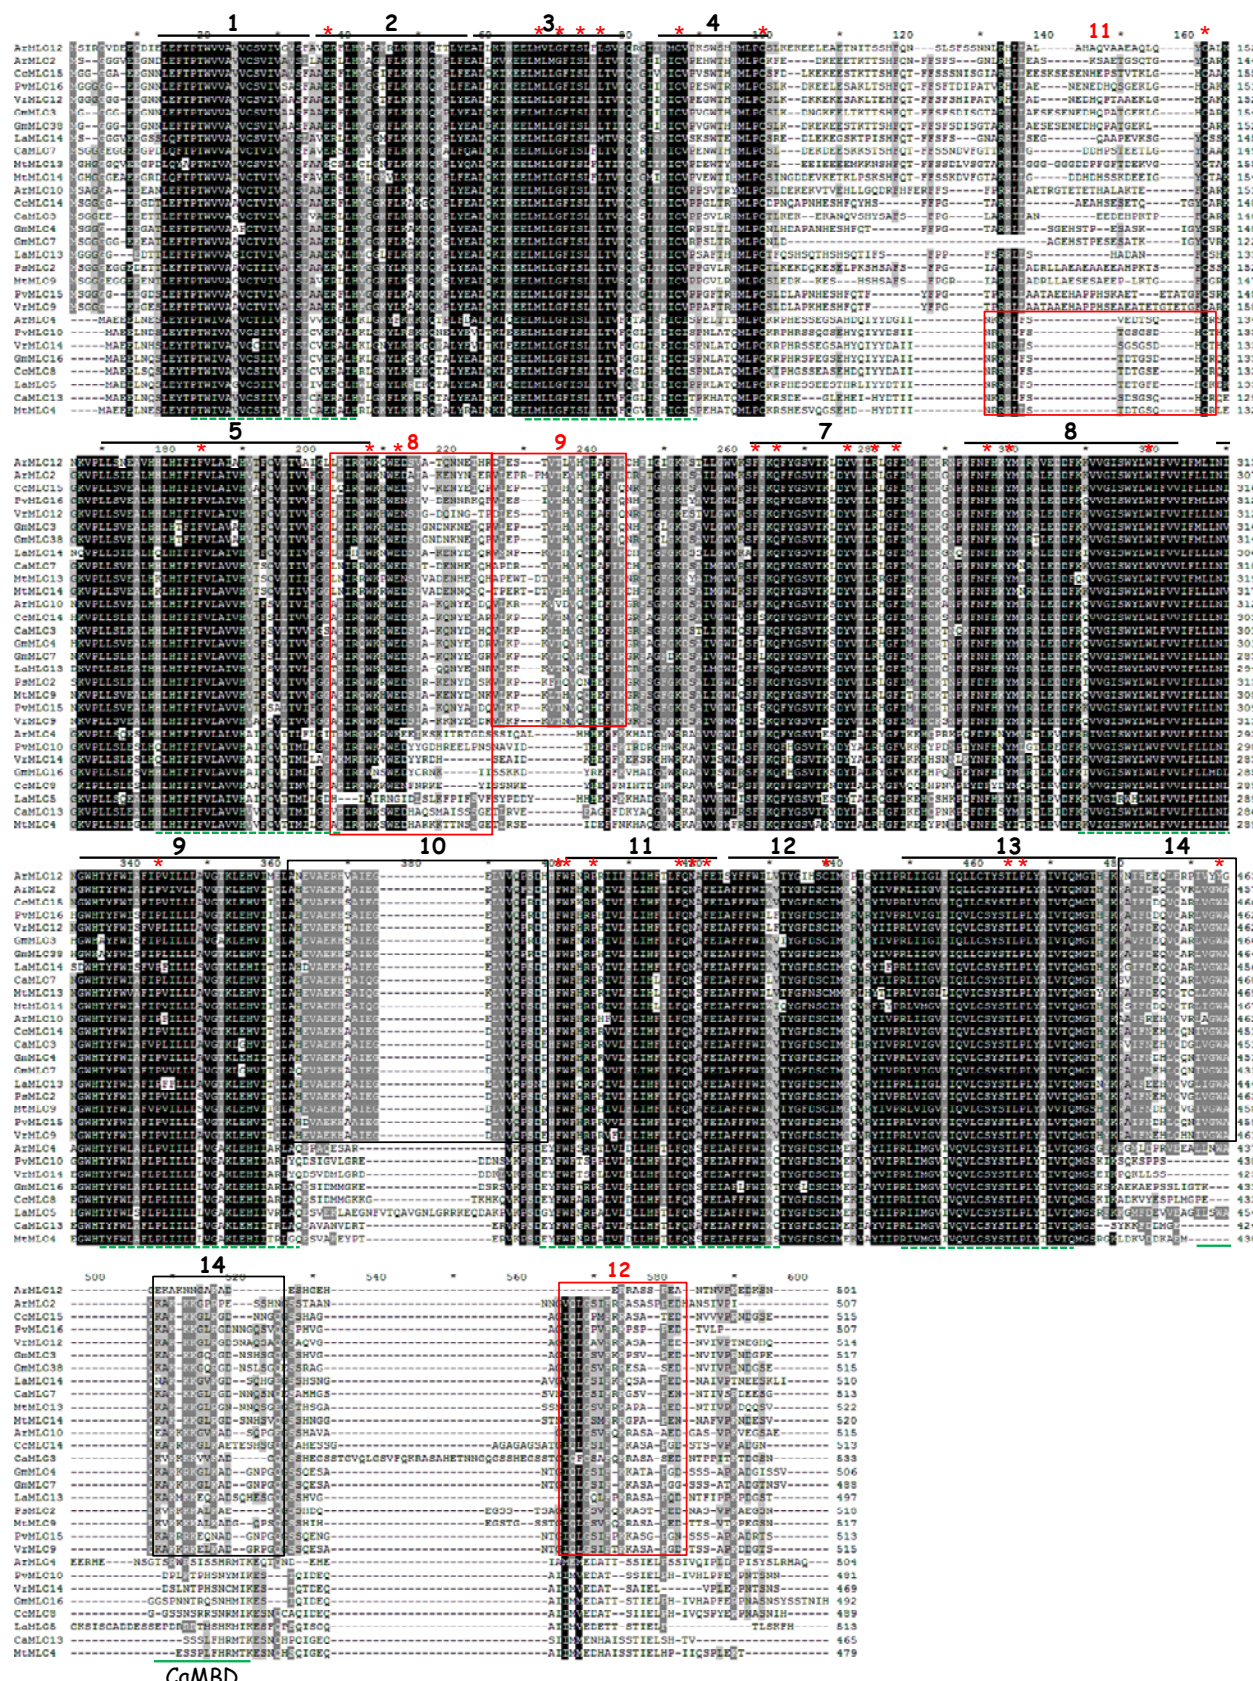



**Supplementary Figure S5.** Alignment of Clade III MLO protein sequences from legume species. Alignment was obtained with ClustalW<sup>34</sup> with default parameters. Shading represents amino acid conservation at 90%, 70% and 50% respectively. MLO-specific motifs are indicated by black horizontal lines. Clade III-specific MEME motifs are shown in red boxes. Transmembrane domains (green dashed lines) and the CaMBD domain (green line) are represented below the alignment. Red asterisks on top of the alignment show the 30 highly conserved residues previously detected in MLO sequences<sup>33</sup>.

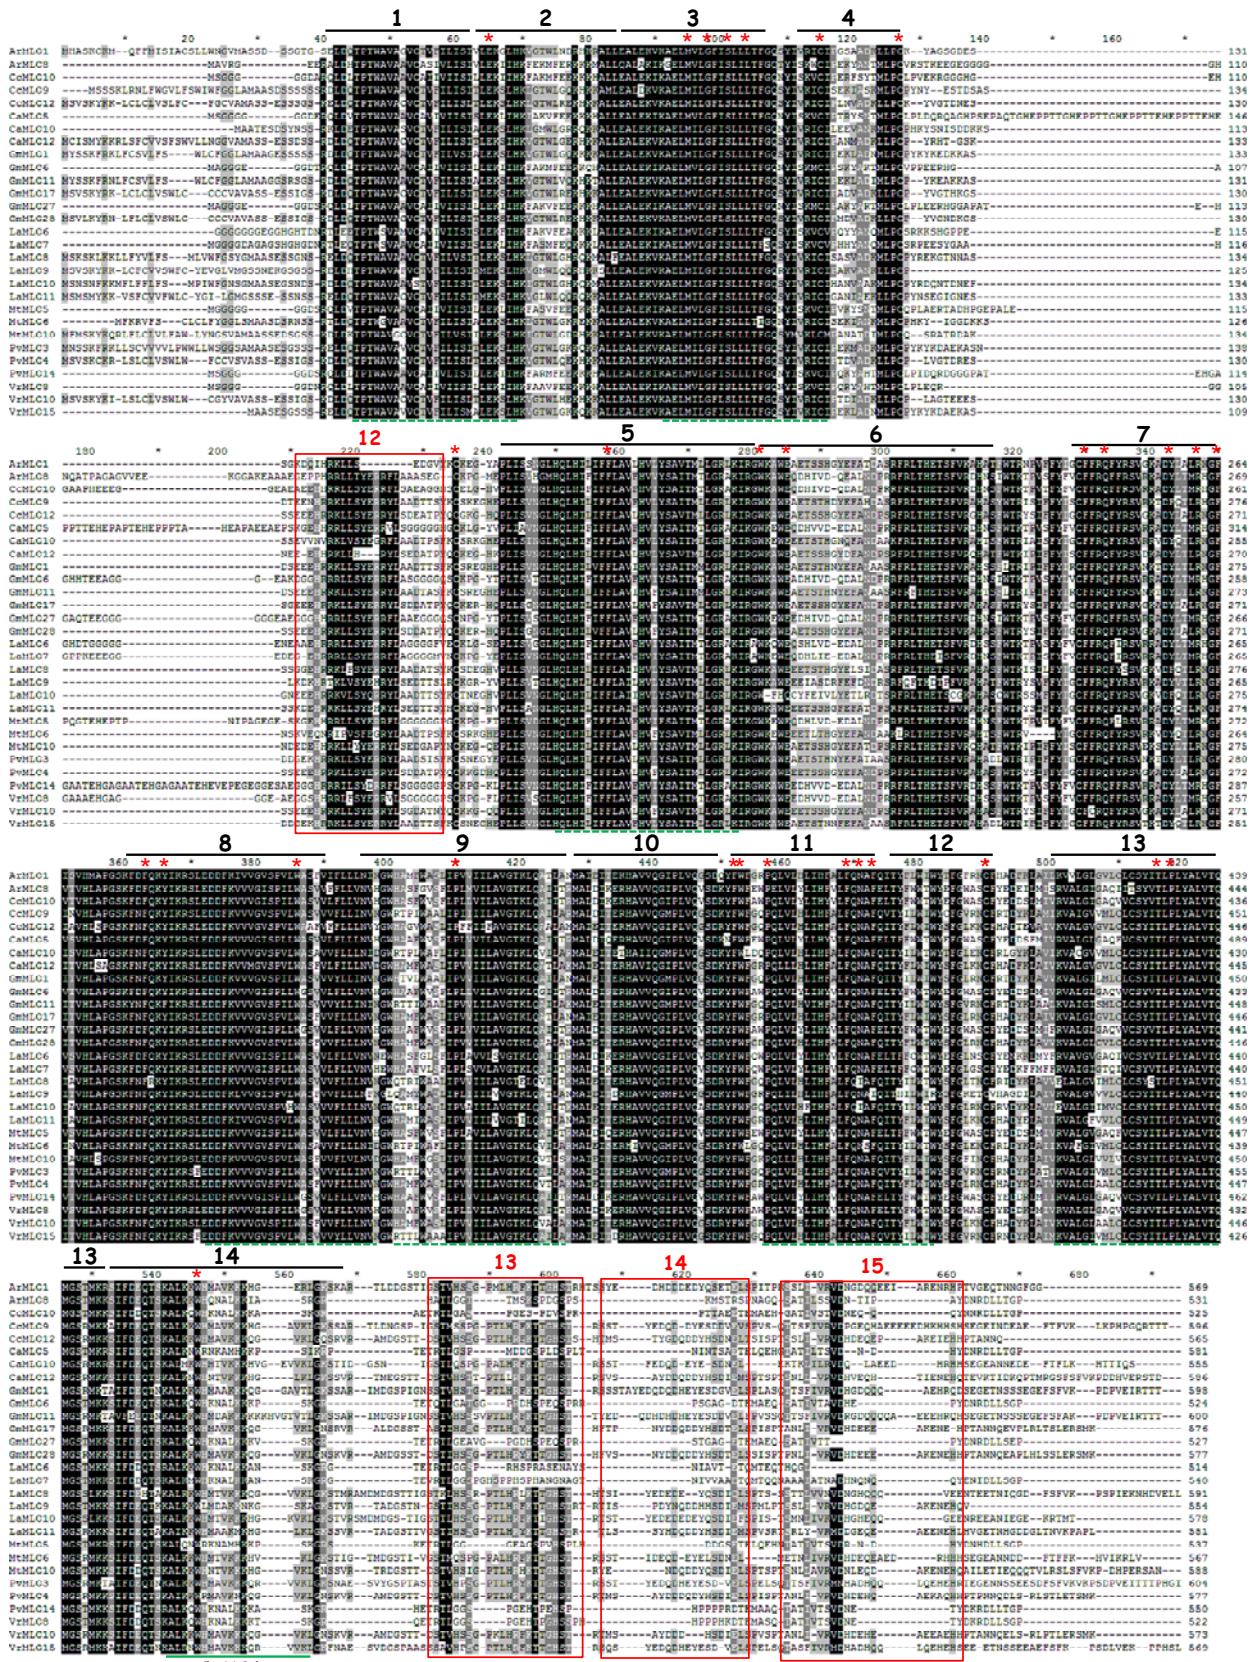

CaMBD



**Supplementary Figure S6.** Alignment of Clade IV MLO protein sequences from legume species. Alignment was obtained with ClustalW<sup>34</sup> with default parameters. Shading represents amino acid conservation at 90%, 70% and 50% respectively. MLO-specific motifs are indicated by black horizontal lines. Clade IV-specific MEME motifs are shown in red boxes. Transmembrane domains (green dashed lines) and the CaMBD domain (green line) are represented below the alignment. Red asterisks on top of the alignment show the 30 highly conserved residues previously detected in MLO sequences<sup>33</sup>. A motif similar to the [DE]FSF tetrad previously identified in Class V MLO sequences by Panstruga<sup>35</sup> is also shown in numbered blue horizontal line below the alignment.

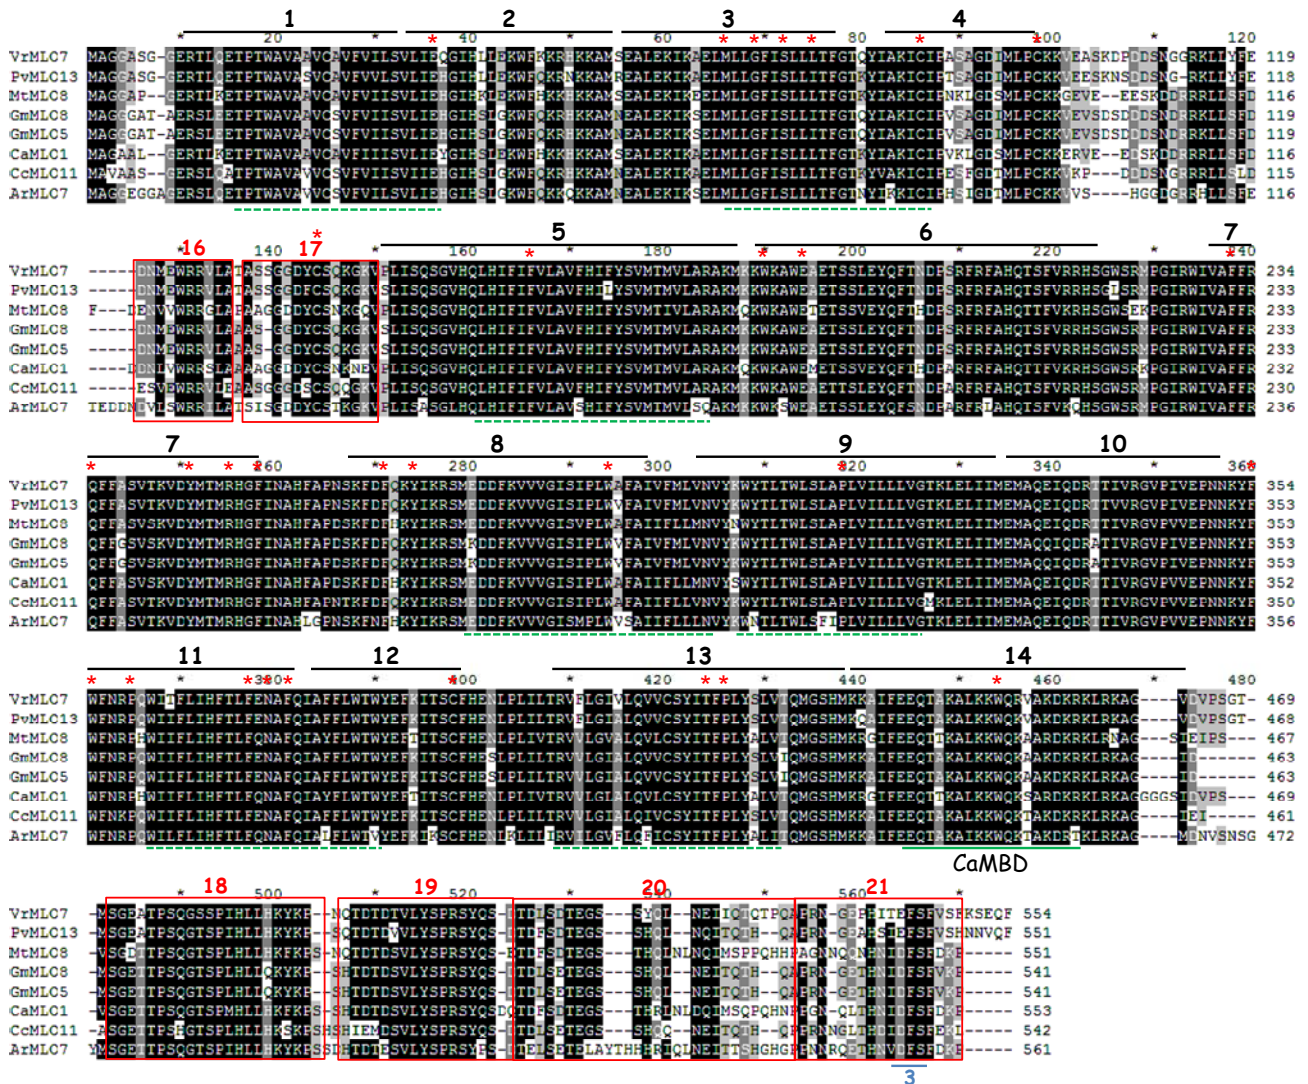



**Supplementary Figure S7.** Alignment of Clade V MLO protein sequences from legume species. Alignment was obtained with ClustalW<sup>34</sup> with default parameters. Shading represents amino acid conservation at 90%, 70% and 50% respectively. MLO-specific motifs are indicated by black horizontal lines. Clade V-specific MEME motifs are shown in red boxes. Transmembrane domains (green dashed lines) and the CaMBD domain (green line) are represented below the alignment. Red asterisks on top of the alignment show the 30 highly conserved residues previously detected in MLO sequences<sup>33</sup>. Conserved motifs identified previously from clade V MLO sequences<sup>16,35</sup> are also indicated by blue lines below the alignment.

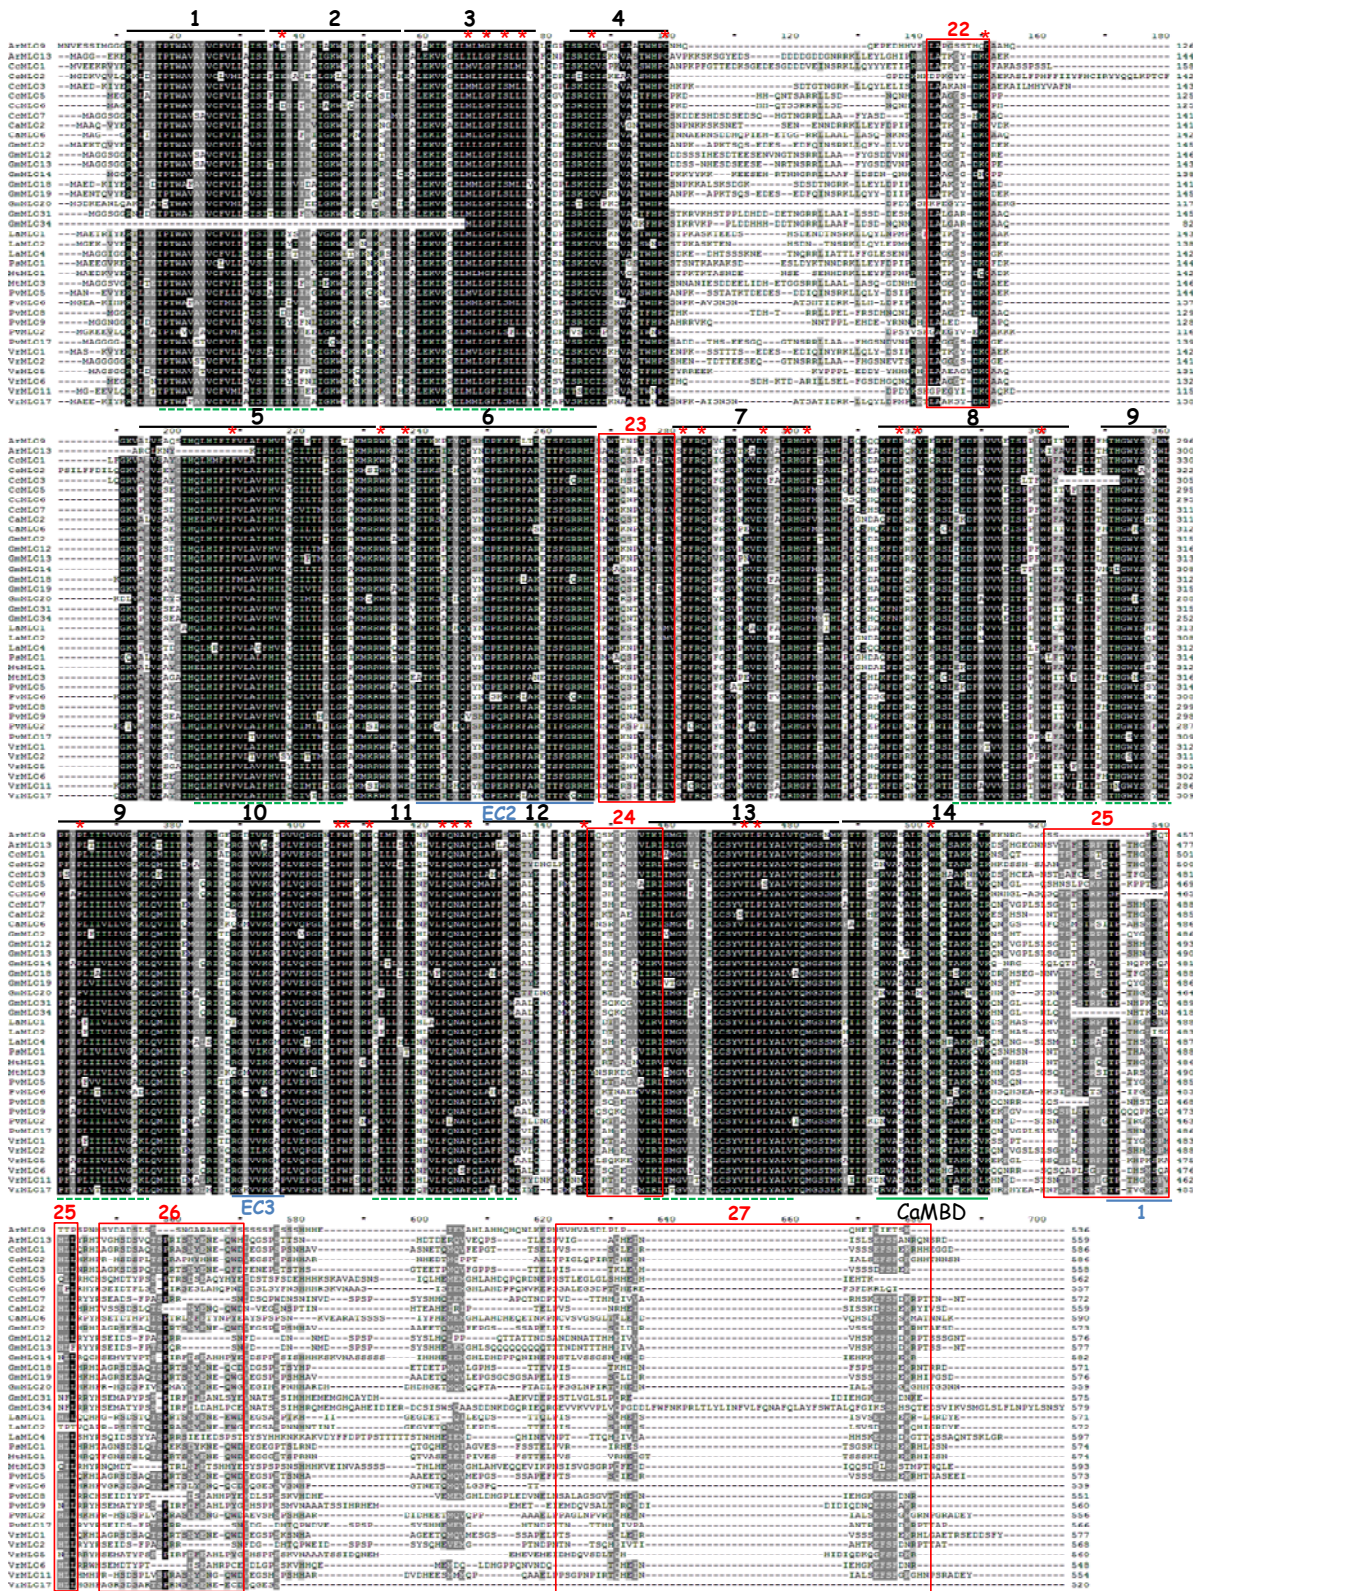



**Supplementary Figure S8.** Alignment of Clade VI MLO protein sequences from legume species. Alignment was obtained with ClustalW<sup>34</sup> with default parameters. Shading represents amino acid conservation at 90%, 70% and 50% respectively. MLO-specific motifs are indicated by black horizontal lines. Clade VI-specific MEME motifs are shown in red boxes. Transmembrane domains (green dashed lines) and the CaMBD domain (green line) are represented below the alignment. Red asterisks on top of the alignment show the 30 highly conserved residues previously detected in MLO sequences<sup>33</sup>. A motif similar to the [DE]FSF tetrad previously identified in Class V MLO sequences by Panstruga<sup>35</sup> is also shown in numbered blue horizontal line below the alignment.

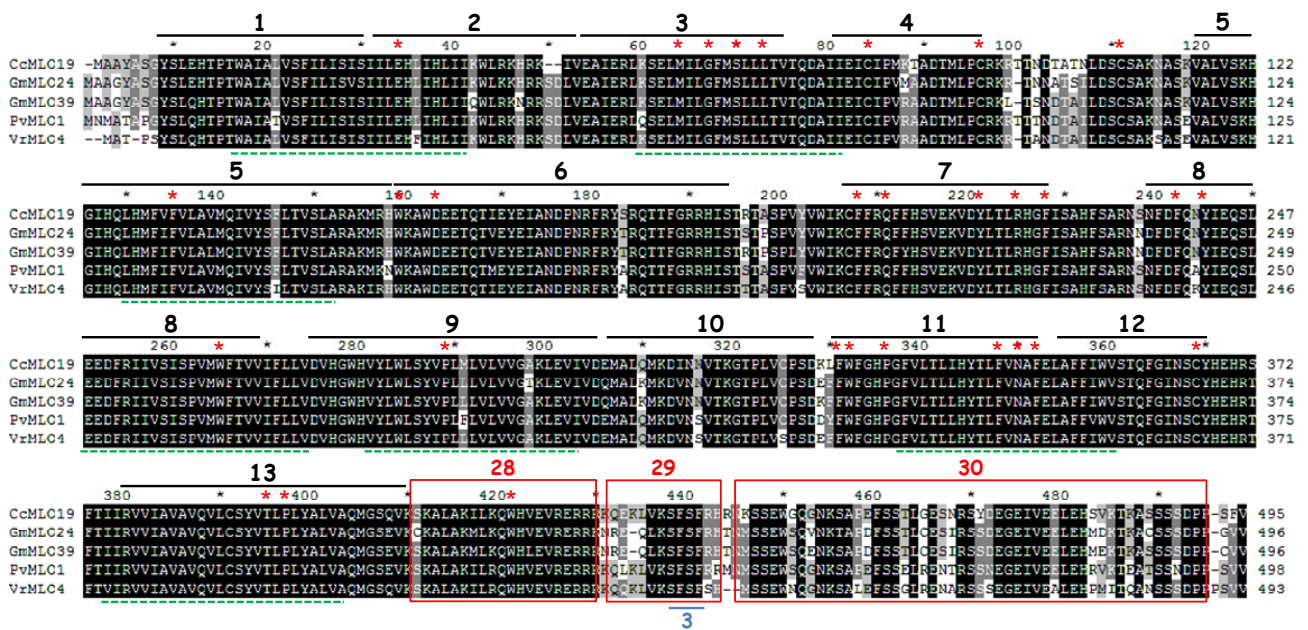

**Supplementary Figure S9.** Alignment of Clade VII MLO protein sequences from legume species. Alignment was obtained with ClustalW<sup>34</sup> with default parameters. Shading represents amino acid conservation at 90%, 70% and 50% respectively. MLO-specific motifs are indicated by black horizontal lines. Clade VII-specific MEME motifs are shown in red boxes. Transmembrane domains (green dashed lines) and the CaMBD domain (green line) are represented below the alignment. Red asterisks on top of the alignment show the 30 highly conserved residues previously detected in MLO sequences<sup>33</sup>.

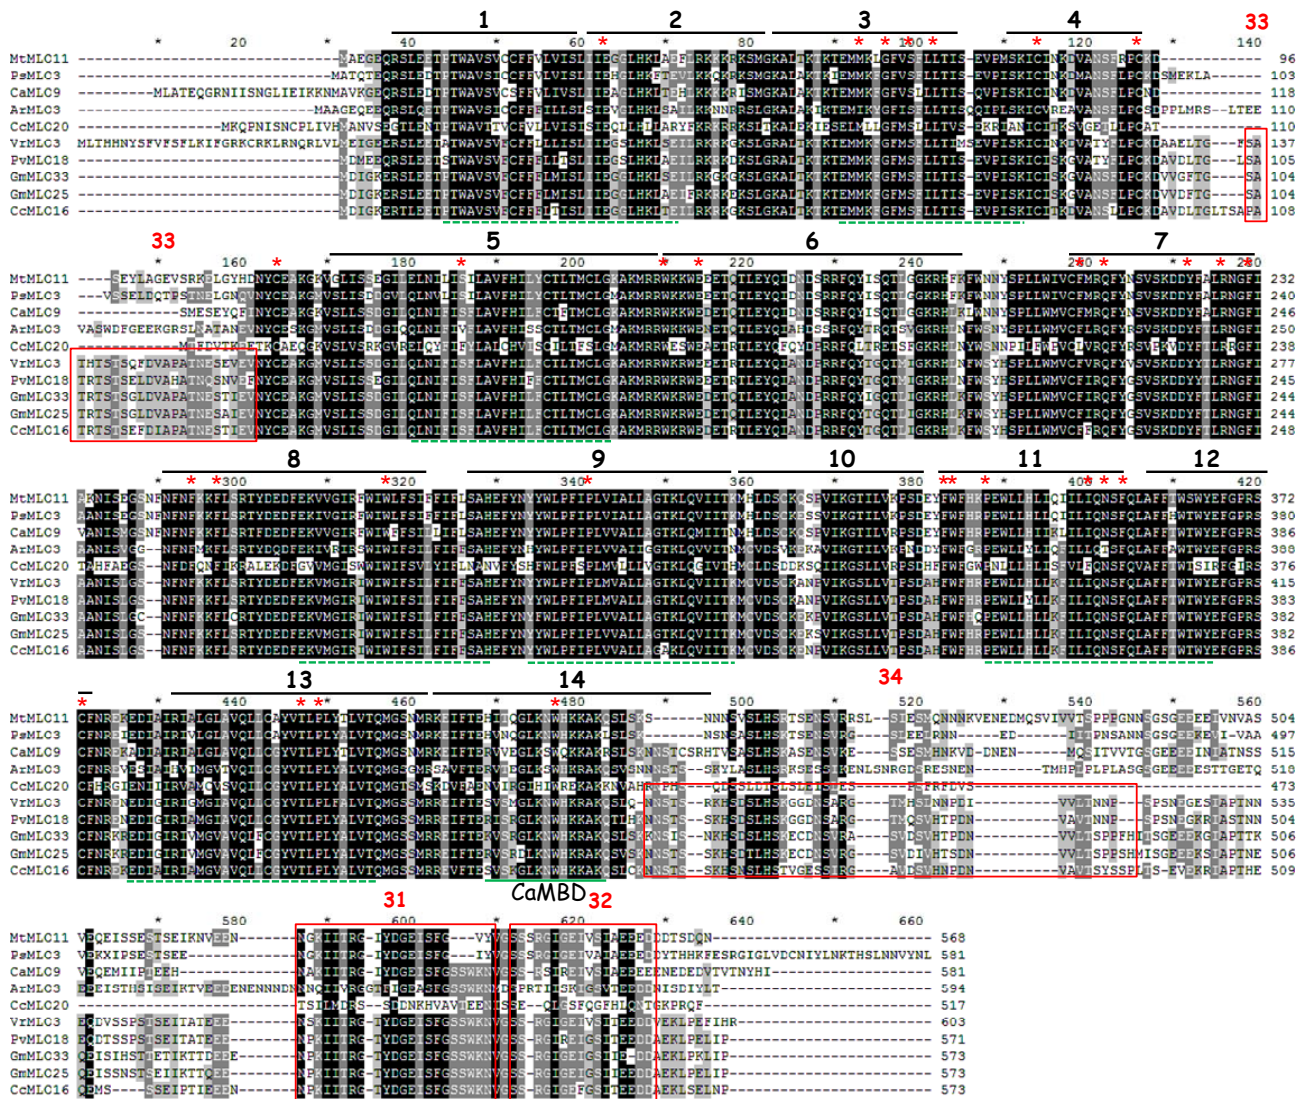

**Supplementary Figure S10.** List of legume *MLO* CDS sequences.

>ArMLO1 ARADU.27DYI

ATGCATGCCCTCAAAGTGCAAAATGCAGTTTTTTTTATGATCAGCATAGCGTGTAGCTTGTATTGGAATGGTGTAAATGGCGTC  
AAGTGATAGCAGTGGGACTGGGAGTGAACCTTGATCAAACACCAACTTGGGCTGTGGCTGGTGTCTGCACCTGTCTTCATCT  
TAAATTTCCATTGTTCTTGAGAAGGGTCTTCACAAAGTTGGAACGTGGCTAAATGATAGGCACAAGAGGGCTCTGCTTGAA  
GCTCTTGAGAAAGTCAAAGCTGAGTTGATGGTTC TAGGCTTCATTTCTCTGCTTTTTGACATTCGGGCAGAGTTACATTGT  
TAGAATTTGTATTCCCTGGCAGTGCCGCGGACAAACTGTTGCCATGTAAATATGCAGGTAGCGGCATGAGAGTAGCGGCA  
AAGATCAAATTCATAGGAAACTTCTATCAGAAGATGGAGTTTATAAATGCAAGGAGGGATACGCGCCGCTTATATCAAGC  
AATGGGTTGCACCAGTTACACATCCTCATATTTCTTTGGCAGTTCTTCATGTGCTTTACAGTGCTGTCACAATGCTTCT  
TGGGAGACTGAAGATACGCGGGTGAAGGCATGGGAGGCAGAGACTTCATCTCATGGCTATGAGTTTGCTACTGATGCTT  
CGAGATTCGGCTAACTCATGAAACATCGTTTGTGAAAGCCCATGCAACTTTTTGGACTAGAAATCCCGTCTTCTTCTAT  
ATCGGTTGCTTCTTTAGACAGTTTTATAGGTCTGTGGGTAAAGCTGACTACTTAGCTCTTCGCAATGGTTTTATCAGTGT  
CCATATGGCTCCTGGAAGTAAATTTGACTTCCAAAAGTATATCAAAGATCCTTGGAGGACGACTTCAAGATAGTTGTTG  
GAGTCAGTCCCTGTCTCTGGGCGTCTGTTCTGTCATTTTTCTACTACTAAATATTAATGGATGGCATGCTATGTTTTGGGCA  
TCCTTAATTCCTGTCTGTGATAATTTTTGGCTGTTGGAACAAAACCTTCAAGCCACATTAGCAAATATGGCTATAGAAATCAC  
AGAAAAGCATGCTGTTGTCCAAGGGATTCTCTTGTTCAGGGCTCTGACCAATATTTTTGGTTCCGGTCGGCCTCAGTTAG  
TTCTTCATCTTATTACATTTTGTCTTTGTTCCAGAATGCATTCCAAATAACATATTTCTTGTGGATATGGTACACTTTTGGG  
TTTAGAAACTGTTTTTCATGCTGACTTCAAGCTTGAATACTTAAAGTAGTTTTAGGGCTTGGAGTGCTATGCCTATGCAG  
TTATATCACGCTTCCGTTATACGCTCTTGTACTCAGATGGGCTCAACAATGAAAAGATCAATATTTGATGAACAAAACAT  
CTAAGGCGCTAAAGAAATGGCACATGGCTGTGAAAAGAAGCATGGAGAGAGGCTAGGGAAGTGAAGGCGCAACCTTG  
GACGACGGAAGTACCATTGGTTCGACGGTGCATTTCTCAGGACCAATGCTACACCGCTTCAAACCACCGGCCACTCGAC  
ACGGCACACTTCATCCTATGAGGACCATGATGATGACGAAGATTATCAATCTGAGACTGAATTGTCTCCCATTACTCCAA  
GATCAAGCTTGATAGTGAGAGTGGATAATGGTGACCAGCAAGAAGAAATAGCAAGAGAAAATAGGCACCCCACTGTTGGA  
GAACAAACCAATAATGGTTTTGGAGGTTAA

>ArMLO2 ARAIP\_Y3LT4

ATGAGCGGCGGAGGCGTGAAGAAGGTAACGATTTGGAGTTCACTCCGACGTGGGTTGTGGCCGTCGTTTGTCTCCGTCAT  
CGTCGCCGTTTCCCTCCTCGCCGAGCGTCTTCTTCACTATGCCGAAAATTTCTTAAGAGGAAGAACCAGAAGCCACTCT  
TTGAAGCTCTCCTCAAAGTCAAAGAAGAGTTGATGCTGATGGGATTTATATCTCTGCTTCTGACGGTAACACAAAATGGG  
ATCATAAGAATCTGTGTGCCAGAGCATTTGGACTCACCACATGCTTCCATGTAAATTTGAGGATAAAGAAGAAGAAAACAAA  
AACAAACATCACATTTTCAAGATTTTTTCTCTTTCTCTGGAAATCTCAGGCACCTTCTGGAAGCTTCCAAATCAGCAGAAA  
CAGGGTCCCAAACCTGGATATTGCGCTCGGAAGGGCAAGGTGCCTCTATTGTCCATTGAAGCCCTTCATCACTTGCATATC  
TTCATTTTTGTGTTAGCTATAGTTTCAATGTAACCTTTTGTGTTCTCACGGTAGTTTTTGGAGGATTAAGAATACGACAGTG  
GAAGAACTGGGAAGACGCTATTGCAAAAAGAAAACATAATTGAGAACGAGTTTTGGAACCAAGGCCAATGGTACTGAAG  
TTCATCAACATGAATTTATAAGGGACCGTTTACAGGTTTTGGCAAAGATTCCGCTATTTTTGGGATGGATGAAATCCTTT  
TTCAAGCAATTTTTTGGATCCGTGACGAAATTAGATTATGTGACATTGAGGCTTGGTTTTATTATGACCCACTGCAGGGG  
AAATCCAAAGTTTTAATTTTCAAGTATATGATTCGTGCTCTTGAAGATGATTTCAAGAAAGTTGTTGGTATAAGTTGGT  
ATCTTTGGATCTTTGTGGTCACTTCTTGTGATTAATATTAACGGTTGGCATAACATATTTCTGGATCGCTTTCATCCCT  
GTCATTGTGCTGCTTGGCGTAGGGACAAAGCTGGAACATGTAATAACCCAATTAGCACATGAAGTGGCAGAGAAGCATGC  
AGCCATTGAAGGTGAATTTGGTGGTTCAACCATCTGATGATCACTTCTGGTTTTACCAGCTTGCATTTCTTCTTCTTGA  
TTCATCTCATCTTTTCCAAAATGCTTTTGGAGATTGCTTTCTTCTTCTGGATTGGGTTACTTATGGGTTTACTCGTGT  
ATAATGGGTCAAGTTTCGTTACATTGTTTCCAAGGCTCATTATTGGGGTATTTATTAGCTTCTATGTAGTTACAGCACTCT  
CCCCTCTATGCTCTCGTTACACAGATGGGAACCTCATTAAAGAAGGCAATATTTGATGAGCAATTACAAGTGAAGGCTTG  
TTGGTTGGGCACAGAAGGCAAAGAAGAAAGGACCAAGACCTGAAAGTTCTCACAACGGTTCTTCAACCGCCGCTAATAAT  
AATGGAGTTCAGCTTGGCTCAATTTTCAAGGAGGCTTCAAGATCTCCCCAGAAGACCATGCCAATTCCATTGTCCAAT  
CTAA

>ArMLO3 ARADU.65SUF

ATGGCGGCGGGGGAACAAGAAGAGCAAAGAAGCCTTCAAGAAACACCAACATGGGCTGTCTCAATCTGCTGTTTCTTCTT  
TATTTTGTATCTTTGTCCATTGAAGTTGGTTTACACAAATTTGAGTGCATTTTTGAAGAAAATAATCGAAGGTCCCTAG  
GGAAGGCTTTGGCTAAGATCAAACAGAGATGATAAAATATGGATTTCATATCGTTTTCTTCTGACAATATCGCAACAAATA  
CCGTTATCCAAAATCTGTGTGAGAGAGGCTGTGGCAAATTTCTTCTTACCATTGATGAGGAGCTT  
AACAGAAGAGGTAGCTTCTTGGGACTTTGGAGAAGAAAAGGACGTTTCAATTAATGCAACAGCAAACGAGGTCAACTATT  
GTGAATCAAAGGGCATGGTTAGTCTGATCTCGGATGATGGAATCCAACAATTAATATCTTTCATCGTATTTCTGGCGGTT  
TTTCATATATCGTCTGCACTCTAACAATGTGTCTTGGAAATGGCCAAGATGAGAAGATGGAAAAATGGGAGAACGAGAC  
TCAAACACTTGAATACCAAATAGCTCATGATTCAGTAGGTTCCAATATACCCGTCAAACATCGGTTGGCAAGCGTCATT  
TGAACTTTTGGAGTAATTTATCTCCCTTACTTTGGATGGTTTGTTTTTTGGAGCAATTTCTATAGGTCAGTCTCAAAGAT  
GATTACTTCACTCTCCGAAATGGATTCAATGACGTAATATTTCTGTAGGGGGCAATTTCAACTTCATGAAGTTCTTCTT  
CCGTACTTATGATCAGGATTTTGAAGAAGATTGTTTCAAGTCAAGTCTGGATTTTCTTCCATCTTCCATCTTATATTCT  
TCTCTGCTCATGAGTTCTATAATCATTACTGGCTTCCATTTATTTCCCTTGTGGTTGCTATAAATGGCGGGACAAAACCTG  
CAAGTGGTTATAACGAACATGTGCGTGGATAGTGTGAAGGAAAAGGCAGTTATCAAAGGAACATTCTTGTGAAACCCAA  
CGATGACTATTTCTGGTTTGGTAGACCTGAATGGCTTCTCTATTTAATTCAGTTTCATCCTTCTTTCAGACCTCCTTTCAAC  
TAGCATTCTTTGCTTGGACTTGGTATGAATTCGGTCCAAGATCATGCTTTAATCGAGAAGTAGAAAGCATTGCCATACAT

GTTATCATGGGCGTAACTGTGCAGATCCTCTGTGGTTATGTCACTCTACCCCTTTATGCTCTTGTACTCAGATGGGTTT  
TGGCATGAGGAGTGTGTATTACAGAGCGCGTAACTGAAGGCCTTAAAAGTTGGCACAAAAGGGCCAAAACAATCAGTTT  
CAAACAACAATCAACTTCAAGCAAATACTTAGCTTCTTTACATTCCAGAAAAAGTGAATCTTCAATAAAAAGAGAATCTA  
AGCAACCGAGGTGATTCAGAGAATCTAATGAAAACACAATGCACCCTCTTCCACTACCTTTGGCTAGTGGAAAGTGGTGA  
AGAAGAGGAAGAGAGTACTACAGGTGAAACACAAGAGGAAGAAATATCAACTCATTCCATTTTCAAAAATCAAACTGTTG  
AGGAAGAAGAGAATGAGAATAATGACGACAACAACAATCAGATTATTGTAAGAGGAGGAACATTTATTGGAGAAGCCTCT  
TTTGGAAAGTAGCTGGAAAAATATGGACAGTCCAAGAACCATTATTTCAAAAATTGGTTCCGTAAACCGAAGAAGATGACAA  
CATTAGTGACATATACCTCACTTGA

>ArMLO4 ARADU.N8G7F

ATGGCAGAAGAAGAACTGAATGAGTCTCTGGAATATACACCAACATGGATTGTAGCTGTTGTTTGCACCATCATTGTTTT  
TATCTCTCTTGTGTGTCGAGCGCGGCCCTCCACAAGCTCGGAAAGTACTTCAAGAAAAAGAACCAAACCTCCATTATTTGATG  
CCTTGCAAAAATTGCAAGAAGAATTGATGCTTTTAGGGTTCATTTCCCTTCTACTAACTGTCTTTCAAACCTGCAATAAGC  
CACATTTGCATCTCACCTGAGCTTACAACCACAATGCTTCCATGCAAGAGGCCACATGAATCGTCTGAAGGTTCCGGCACA  
CGATCAGATCTACTATGATGGTATAATCAACAAAAGAAGGCTTTTTTCTGTTGAAGATACTTCTCAGCATTGTAGGAGTA  
AGGGGAAGGTTCCACTGTTATCACAAGAATCATTGCATCATTGACATTTTCTCTTTGATTGGCTTTAGTACATGCA  
ATATTTCTGTGTCACCACATTTGTTTCTTGGAAATCACAAGGATGCGTCAGTGGAAAGAGATGGGAGGAAGAAATTAAGAGCAA  
AATAACAAGAACAGGAGATTCTAGTAGTATCCAAGCTCTCCATCACCATGAGTTCTTCAAGAAACACGCCGACGGATATT  
GGAGAAGAGCAGCTGTTGTTGGTTGGCTGATATCATTCTTCAAACAATTTTATGGTTCTGTTACTGAATCTGACTACATT  
GCGCTGCGTTATGGATTTATCAAGATATCATTCTTCAAACAATTTTATGGTTCTGTTACTGAATCTGACTACATTGCGCT  
GCGTTATGGATTTATCAAGGAACATTTGCCCGCGCAAACCTCAGTTTGATTTCCACAATTACATGGTGCAGGACACTTGAAG  
TTGATTTCAGAAGAATTGTAGGCATAAGCTGGTACCTGTGGCTCTTTGTTGTGCTGTTTTTGTCTGCTAAATATTGCAGGG  
TGGCACACTTATTTCTGGCTTGGCTTTTTTACCAGTGATAAATTTGCTTCTTGTGGGGGCAAAGTTAGAGCACATCATAGC  
GCGCTTGGCGCAGGAGCCGGCAGGAGTCAAGCTGAGCAGTGTGAAGCCGTGAGTGAATACTTCTGGTTTAGCCGCCAACAC  
TTGTCCTTGACTTGCTTCAATTTCACTTTATTTCAAGAATCTTTTGGATTGCAATTTTTCTTCTGGATCTGGTGCACATAT  
GGATTTGATTCATGCATTATGGAGAAAATATCCTACATCATCCCAAGACTTATAATGGGTGTGATTGTTCAAGTGCTTTG  
CAGTTACAGCACCTTGCCTCTATATACTTGTACTCAGATGGGTAGTGGTTTCAAGAAGGGTATGCTCGATCCGCGGG  
TGGAGGAAGCCCTCTTGAATTGGGCAGAGGAAAGACATGAGAATCCGGCACCAGTAGGTGGCGGAGCATATCATCCCAT  
AGAATGACCAAAGAACAACAACAATGATGAACATGAAATAGCCATGGAGATGGAAGATGCAACAACATCTTCAATTGA  
GCTTCTTAGCAGCATTTGCCAAATTCCTTTGGACAGGCCTATTAGTTATTCTTTGAGACATGCTCAATAA

>ArMLO5 ARADU.U7W18

ATGGCGGAGGTGCTTCGACGAGGTGCTCTCTGGCTGAGACGCCAACATATTCAGTTGCTTCCGTTATTACTGTTATGGT  
CTTCTCTGCTTCGTCGTTGAGCGCTCCATCTACCGCTTTGGAAGTGGTTGAAGAAGACAAGAAGGAAGGCTCTCTTTG  
CATCACTGGAAAAGATTAAGGAAGAGTTGATGCTACTTGGTCTTATCTCTTTGTTGTTGGCACAAAGTGCAAGATGGATC  
TCTGAAATATGTGTGAATTCATCACTGTTCAATAGCGAGTTTTATATTTGTTCTGAAAAAGACCTTGACGCGAACCCAGAA  
TGTCATGCCCCGATGGTTTATCCTTTTCCCCTGATGAAACTGATATTCCAAAGGGACTAATTAGTGGTTCAATCAAT  
GCCCTGCCGGGCACGAGCCATTTGTTTATATGAGGGTCTTGAGCAGCTGCACCGGTTCTTGTGTTGTTCTTGGGATCACT  
CATGTTCTATACAGTTGCTGCGCAGTCCGTTTGGCAATGAGCAAGATTTATAGTTGGCGCAGATGGGAAAAATCAGACCAC  
AGCTGCCGCGGACGGAATCTGCAAGGAAAGAGAAACAAGGTGATGAGGCGGCAGATAACCTTTGTTTTTTCATCATGCTT  
CACATCCATGGAGGAATCCAATACTCATCTGGATGCTTTGTTTCTGCGCCAGTTTAGGAGTTCTATAAAAAAATCA  
GATTACCTTGCACTCCGTTCTGGTTTTTATCACTGAGCACAGATTGCCACTGTATATAATTTTTTATCAATATATGGTTG  
AAGCATGGAAGATGAATTTTATGGCATTCTAGGCATAAGCTGGCCACTTTGGATTTATGCTATAATCTGCATCTTTGTGA  
ACATCCATGGTCTGAATATATACTTCTGGCTGTCAATTTATCCCTGCAATGCTTGTGATGTTGATAGGCACAAAACCTTCAA  
CATGTAGTATCCACTTTAGCACTTGAATTTATGGAACAACAGGGTCCACTTGCTAGGACACAAGTAAAGCCACGTGATGA  
TCTCTTCTGGTTTTAAAAGCCAGAAATACTCCTATGGCTGATTCAATTTGTGATATTTCAGAATGCCTTTGAAATGGCAA  
CATTTATTTGGTCATTTGTGGGACTAGAGCAAAAATCATGCTTTATGAAGAACCATTACATGATCATCATTGCTTTGGCA  
TCGGGTGTTCTTGTTCAGTTCTGGTGTAGCTACATGACAGTGCCTTGAATGTGATAGTTTACAGATGGGATCGCGGTG  
TAAGAAGGCCTAGTAACAGAGAGTGTAGAGATTCAATGACAGTTGGTGTAAAAGAGTAAAACAGAAATCGAAACATG  
ATCACTCGCATCATACTGCAAGATCAGTCTGTTCCCTTGAATCAACAATTGATGAGAGGGATGAGATAACAGTAGTATCT  
GGTACTCTAACTAGAAGCTCTTCCCTTAGACTTAGAGTCTTTGAATCAGATAACAGTAACCTTCACTAGACCAACTCAAAT  
TGAAGCTTCCAACAGCTCCAGAGACCAAGATTCAATGAAAGTGGCCGAGTATTTGTCCAAATCTGTACATATTGACTCGA  
CACAAACCGCCGATAATGGCGAGGACCATGTTGGTGGCAGTGAAGACGTAGCAAAAATCTGAGACTCTTTCTGATTTGTTT  
CAGAAAACATGA

>ArMLO6 ARAIP.HRR0E

ATGATGGAACCAATCGGAAGAAGATCCTTGTGCAAAAACCAACTTGGGCTGTGGCAACTGTTGTCACTATCCTTGT  
TTCTCTTAGTTTTCTTGTTCATGGCACATTAAGAAGTTTTCTTAAGTGGATGGCCAGAACCAAGAGAAAATCTCTGCTTT  
CTGCTCTGAAAAGATCCAAGAAGAATTAATGCTGTTTGGGCTGCTGTGATTGATCATGGGTCAATGGATTATCTTTGTG  
GCGAAGATTTGTGTCAAATCATCAGCATTAAAGCAGCAGGTTCTTCCCTTGTGCAAGTCAAAGACATTTCTGGAACAGCAGT  
GCAACACAATATTTTCTGGCATACTTACACTATAATAACAGTGATTCCAAAGAGAACTCCACATTGGCCTCCGAAAT  
ATTGTCTGAGGGACATGAATCATTGGCTTCTTATGAGAGCCTTGGAGCAGCTTTCATCGCTTTATGTTTGTCTTGGCAATC  
ACACATGTTACATATAGCTTTGTTGCTGTTGCCCTGGCCATGATCAAGATATATAGCTGGAGAACATGGGAAAATGAAGC  
AAAGACTATGGCTTTACAACAAGCTTGAAGGACTCCACAACACTACATCAAGCATAAGATTGAATCGGCTTACAACGT

TCGTCCTTTCACCAAACATCCCATCCCTGGAGTAATCACAAAGTTCTTGTGGCTGCTATGCTTCAGCCGCCAATTCTGG  
AGTTCATCAACTGTGCTGATTACATGGCGTTGCGCTTAGGCTTCATTACTAATCATGAGCTTCCCCTGCATATGATTT  
CCACAACATATGCTGCGAAGCATGGATGATGAATTTCTGACATTGTTGGTGTAGTGTGCTTCTCTGGATATATGCCA  
TATGCTGCATATTTCTAAATTTTTCATGGAAGCAACTTTTACTTTTGGCTTTTCTTTGTTCCAGCAATTTTGATACTCATA  
ATTGGTACTAAATTGCACCGAGTGGTGGTAAAGTGGCTACTGAAATAGTAGATCGTTGCCCTTATGTTAAGCCTCATCA  
GTTTAAATTTGAGAGATGAACCTTTTGGTGGTAAAGCCAAAGGTTTTTGTTCGCGCTTAATACACTTGATATCCTTCTTGA  
ATGCGTTTGGATGGCATCTTTCTTATGGTCCCTTGTGGGAAATCAAAGAACCTTCTTGTTCATGAAAAACAAAACCTTT  
ATTGCAATCCGCTTATCATTCCGGGTAGTCTCACAAAGTATGGTGCAGCTTCATAACATTTCTCTATATGTTATCATCAC  
ACAGATGGGGTCAAGGTTCAAGAAGTCAGTGGTGTGAGAGAATGTGAGAGAATCACTGTCTAAATGGCAGAGAAGAGTGA  
AGCACAAACAGAGTTCCCCTCAAGCAC'TGGT'TTCTGAAACATCTCCATCATCGGATTCTGGTATCAACAATGCAATGGAC  
AAGTTAATCAGTGGGGAAGGAAGCTCCTCTGGAACATAACATGATTATTGTTACTCTCATCATCATTTTTGATTATGTCTC  
TTCCAGAACACAAAGAAATGAACCATTTCTTAGTCATGATGATGATGATGATGATGATTTCATATCCTCTTCCACTTTCTT  
GA

>ArMLO7 ARADU.0YR51

ATGGCAGGAGGAGAGGGAGGAGCAGGAGAAAGATCTCTTCAGGAAACACCCACTTGGGCAGTGGCTGTGGTGTGCAGTGT  
CTTTGTCTATCCTCTCTGTCTTAAATTGAACATGGAATCCATTCTCTTGGAAAGTGGTTTTAGAAAAGCAAAGAAGGCAA  
TGAATGAAGCCTTGGAGAAGATCAAATCAGAATTAATGCTGTTAGGATTCTTATCGCTTCTACTTACATTTGGAACAAAT  
TATATAAAGAAAATATGCATCCCCTCACAGTATTTGGGGACACCATGCTTCCATGCAAGAAGGTGGTTTTACATGGTGGTGA  
TGGTAGGAGACACTTGCCTTTCTTTGAGACGGAGGACGACAATGATGTGTTGTGATGGCGTGCATTCTAGCAACTTCTA  
TCTCCGGCGACGACTATGCTCAACCAAAGGTAAGTGGCACTGATATCTGCTTCAGGGTTGCACCAGTTGCATATATTC  
ATATTCGTCCCTCGCTGTTTCTCACATTTTCTACAGCGTCACTGATGATGGTCCCTATCTCAAGCAAAAATGAAGAAATGGAA  
GCTTTGGGAAGCAGACATCCTCCTTGGAGTATCAATTTCAAATGATCTGCAAGATTGAGTTAGCACATCAAACAT  
CATTTGTTAAACAACATCTCAGGGTGGTCTAGGATGCCCGGAAATTCGATGGATTGTGGCGTTTCTCAGGCAATTTCTTGA  
TCTGTGACCAAAGTTGATTACATGACTATGCGACATGGATTTATAAATGCACATCTTGGTCCAATAGCAAATTCAACTT  
CCATAAGTATATCAAAGATCTATGGAGGACGATTTTAAAGTGGTGTGTTGGTATCAGTATGCCACTTTGGGTTTTCTGCTA  
TCATCTTTCTGCTTTTAAACGTTTATAAATGGAACACGCTCACCTGGCTCTCATTTCATCCCATTAGTGATACTTTTATTA  
GTTGGTACGAAGCTTGGAGCTAATAATAATGGAATGGCGCAAGAAATCCAAGATAGAACCACAATTGTAAGAGGGGTGCC  
AGTGGTGGAGCCAAATAACAAGTATTTCTGGTTCAATCGCCCCCAGTGGATCCTATTCTTGATACACTTCACCTTATTCC  
AGAATGCCTTTTCAAATAGCCCTTTTCTCTGGACAGTGTATGAGTTAAGATCAAGTCTTGTCTCCATGAAAACCTGAAA  
CTAATACTGATAAGGGTATCCTTTGGGGTATTTCTTACAATTCATATGCAGTTATATTACATTTCCCCTCTATGCCCTAAT  
AACCAGATGGGATCACACATGAAGAAAGCAATATTTGAGGAGCAAACAGCAAAGGCCATTAAGAAATGGCAAAGACAG  
CAAAGGACAGAACAAGTTAAGGAAAGCAGGGATGGATAATGTTAGTAACTCAGGTTACATGAGTGGAGAAACAACACCA  
AGCCAAGGAACATCGCCAATTCATTTGCTTCACAAGTACAAGCCTAGTAGCGACCACACAGATACCGAGAGTGTCTCTA  
TTCTCCACGTTTATACCCTTCTGATACTGAGTTATCTGAGACTGAATTAGCATATACTCATCATCATCGTATTCAACTCA  
ATGAGATTACAACATCACATGGACATGGACCTCCAATAACAGACAGGAACTCATAATGTTGATTTTTCTTTTGACAAG  
CCTTAA

>ArMLO8 ARAIP.L2HMX

ATGGCGGTAAGAGGAGAGGAAAGGGCGCTAGATCACACCCCTACATGGGCTGTGCTGCGCTCTGCGCCTCTATCGTCCT  
CATTTCTATAGTGTCTGAGAAAATTATACATAAAATTCGAAAAAATGTTTGAACGTAAAAAGAAGATGGCTCTGTTACAAG  
CACTCGCAAAGATTAAGGCGAGCTTATGGTTTTGGGATTTATTTCTGTTAATATTAACGTTTGGACAAACCTACATTTCC  
AAATGGTGTATTCCCGAGAAGTATGCAAATACCATGCTACCTTGTGTTAGAAGCACGAAGGAGGAAGGCGAAGGCGGCGG  
CGGCGGCCACAACCAAGCTACTCCAGCGGGTGCAGGTTGTTGTGGAAGAGAAGGGTGGTGTAAAGAGGCTGCTGCTGAAG  
GTGAACCGCCCCATCGCAGGCTTTTGACATACGAACGTAGGTTTCTGGCTGCAGCTAGTGAAGGATGTAACCGGGGATG  
GAGCCTCTTATATCTGTGCATGGAATGCATCAATTCACATTTTTCATATTCTTCTTGGCTGTCTTCCATGTGCTATACAG  
TGCCATAACAATGACTCTTGGAAAGAGCAAAGATTCGTGGGTGGAAGGCATGGGAACAGGACCATATTGTGGATCAAGAAG  
CCTTGAATGATCCTAGAAGATTCAGACTTACTCACGAGACATCATTTGTGAGGGATCACAACAGTATTTGGACTAAAAC  
CCAGTTTCTTCTATTTTTGTATGCTTCTTTTCGACAGTTTTTTCAGATCTGTTTCGCAAGGCCGACTATTTGACCATGCGACA  
TGGATTTGTTACTGTTTCAATTTAGCACCTGGAAGTAAGTTTTGATTTTTCAAAAATATATTAAGAGGTCAATAGAAGACGACT  
TTAAGGTAGTTGTGGGAATCAGTCCAATCTTTGGGCATCAGTGGTGTTTTTCTTGGCTTGTAAATGTTTCATGGATGGCAT  
GCTTCCCTTTGGGGTGTCTTTTCTTCCACTAATGGTTATTTCTAGCTGTTGGGACAAAGCTTTCAGGCAATTATAACCCGAAT  
GGCACTTGACATAAAAGAAAGGCATGCTGTAGTGCAGGGGATCCCCTCTTGTTCAGTCTCTGACAAGTACTTTTTGGTTT  
AGTGGCTGAGTTAGTTCTTTATCTCATCCATTTTGTCTCTTTTTCAGAAATGCATTTGAGCTGACATATTTCTGGTGGACA  
TGGTATGAATTTGGTTGGGCATCTTGCCTTTATGAAGATGAAATACTTATGATTAGTAGAGTTGCACCTGGGATAGGAGC  
TCAAATAATCACCAGCTATGTCACCTTCCACTGTATGCATTTGTTACACAGATGGGATCAACAATGAAGAAGTCAATAT  
TTGATGAACAAACATCGAAGGCTCTAAAGAAGTGGCACCAGAATGCTCTGAAGAAGATAGCATCCAGGGGACGCCATGCC  
ACTTTGGGAGGCACCCTATGTCAAAATCGCCGGACGGTTCAACCAGCAAATGTCAACTAGATCCCCAACGCCGGGCA  
GTCAGCCACCATATTGTGAGCGTAGATAAACACTATCCCCGCCTATGACAACCGTGACCTTCTAACTGGACCATGA

>ArMLO9 ARAIP.CFV17

ATGAACGTAGAGAGTAGTATTATGGGTGGTGGAAAGCCTTAGAGGAAACGCCTACTTGGGCTGTGGCTCTTGTGTTGCTT  
TGCTTGTCTTAAATTTCTATTTTTCATGGACCACATCTTCCACCTCATAGCAAATGGTTGAGGAAGAAGCGCAAGAAAG  
CTCTCTACGAGTCACTTGCAAAGATCAAGTCTGAGCTTATGTTAATGGGGTTTCATATCGCTGCTGCTAACGGTGTACAA

GGTCCAATATCGAGGATATGTGTACCGGAAAAGCTTGCTGCCACGTGGCACCCCTGTAATCATCAACAAGAGCCAGAGGA  
CCATCATGTATTTTTACTAGCCCCGGATCATCTACTCATCAATGTGCAGCTCATCAGGGTAAAGTGGCGCTTGTATCTG  
CTCAAAGCATTTCATCAACTGCACATATTTATCTTCGTGCTCGCTCTTTTTCATGTTCTTTACTGCATATTTACTCTCGCT  
TTAGGCACTGCAAAGATGAGAAGGTGGAAACAATGGGAAGAGGAAACAAAGAAACCTGAGTATCAATTTTTACATGATCC  
TGAAAAGTTACAGACTTACGAGGCAGACTTCCCTTTGGGAGGAGACATTTGAGTGTGTGGACCACAAATCTATTCTCGTTT  
GGATTGTTTTGTTTTCTCAGGCAGTTTGTATGCTCAGTACCTAAAGTGGATTACTTGACCTTGAGACATGGGTTTTGTCTATG  
GCACACTTGGCACCTCAAAGTCAGCAGAAGTTTGATTTTTATGCAATACATTGAAAGAACATTGGAAGAGGACTTCAAAGT  
TGTTGTAGAAATCAGTCCCTCCAATCTGGTTCATCACAGTGTGTTTTCTCTGTTTTCACACGCATGGGTGGTACTCTTATC  
TGTGGATGCCTTTTTGTTCTTTGATTATAATTGTAGTAGTTGGAAGCAAGTTGCAAGTGATAATAACAAAGATGGGTCTT  
AGAATTGGAGAAAGAGGAGACATAGTAAAAGGCACACCGGTGGTGCAGCCTGGTGATAACCTCTTCTGGTTTTAAGAAGCC  
TCAACTTATGCTCTACCTCATTAATTTTTGTACTCTTTCAGAACGCTTTTCAGCTTGCTTTCTTTTTCTTGGACTGCGCTTC  
AATTTGGAATGAAATCATGTTTTCCAATCGAAAACAGAGGATGTGGTTATCAAATCTCAATGGGGATATTGGTTCAAATA  
CTTTCAGCTACGTGACTCTTCCACTCTATGCTCTGGTGACACAGATGGGCTCAAATATGAAGCCCACCATATTCAACGA  
AAGAGTAGCATCTGCTTTAAGGAATTGGCACCAAAGCGCCAAGAGAAACATAAAAAAGAAGAACCGTGGTGGATCCTCCT  
TCTCTCAAACCACAACCTCCATCTCCAAACCCTCTTACGACGCTGATTCTCTTTCTGCTCCTCAACGGGGCCAGGGCCCAC  
TCTTGTTTTTCTTCTCGTCTTCTTTTTCCAGTTCATCTCATACCACGAAATTGAAATGGCCCATCTGGCCCATCACCA  
ACACCAGAATCTCAAAGAGCCCAATTCCGTACATGTTGCTTACAGATCTACCCTGCCCAACATGAAATTCAGATTGAAA  
CCAGCAAGTAAT

>ArMLO10 ARADU.WJ2TG

ATGAGTGCCGGAGGTGCAGAAGAGGAGGCGAACCTAGAGTTCCTCCGACGTGGGTTGTGGCCGCGCTTTGCACTGTAAT  
CGTGGCCATTTCCCTCGCCCGCCGAGCGTTTCTCCATTACGGCGGCAAGTTTCTCAAACAAGAACCAGAAGCCCCTAT  
ACGAGGCTCTACAGAAAATCAAAGAAGAGCTGATGCTGCTGGGTTTCAATTTCTCTGCTTCTCACGGTATCGCAAAACGGC  
ATCACTAAAATCTGCGTTCCCTCCGAGCGTGACTCGCTACATGCTCCCCTGCAGCCTCGATGAAAAGGAGAAGGTACCCTG  
GGAGCATTTACTGGGACAAGACCGTTTTCCATTTGCAACGTTTTCTTCTTTTTCCCGAGGCGCTTCTTGGCCGAGACTCGAG  
GGACAGAGACAGAGACACATGCACTCGCTAAGACTGAATTTCTGCGCTCGCAAGAACAAGGTACCTTTATTATCTGTGGAA  
GCGCTGCATCACCTGCACATCTTCAATTTTTGTACTGGCCGTCGTTTATGTCACCTTCTCCGTTTCTACTGTTATTTTTGG  
AGGAGCAAGAATTGCGCAATGGAAGCACTGGGAAGATTCCATTGCGAAGCAGAACTATGAAACAGACCAAGTTTTGAAAC  
GAAAGGTGGTCGATGTTTACGAGCATGATTTTTATCAAAGGTGCTTTTTCGGGCTTTGGCAAAGATTCTGCCATAGTGGGT  
TGGTTGAAATCCTTTTTTAAGCAATTTTTATGGATCTGTTACAAAGTCAGATTATGTCACACTACGGCATGGTTTCAATTAT  
GACCCACTGCAAGGCGAATCCAAAGTTTTAATTTTACAAGTACATGATTCCGGCCCTTGAAGATGATTTCAAGCAGGTTG  
TTGGCATAAGTTGGTATCTTTGGGTTTTTGTGGTCATATTTCTGTTGCTCAATATCAATGGTTGGCATAACATATTTCTGG  
ATAGCTTTTTATCCTTTTCAATCTTCTACTTGGCCGTTGGCACTAAGCTGGAGCATGTGATAACGCAACTAGCTCATGAAGT  
AGCTGAAAAGCATGCTGCCATAGAAGGTGAATTAGTTGTACAACCATCAGATGATCACTTTTGGTTTTCATCGCCCCACT  
TTGTCCTCTTCTTGATCCACTTTTATCCTTTTTCAAATGCTTTTTGAGATAGCATTTTTTCTTTTTGGATATGGGTTACATAT  
GGATTTGACTCTTGTATAATGGGACAAGTTTCGTTACATAGTTCCAAGGCTCATTATCGGAGTATTTATCCAGGTACTATG  
TAGCTACAGCACCCCTACCCTGTATGCAATTGTTACACAGATGGGAACCCATTTAAGGCAGCAATATTTCTGTGAGCATG  
TGCAAGTGAGGCTTGTGTTGGGCACAAGAGGCAAAGAAGAAGAAAGGGTAAAAGCTGATAGCCAGCCTGGTGAAGGA  
AGTTCTCATGCTGTTGCAGGAATTCAGCTTGGATCAGTTTTCCAGAAGAGAGCATCCGCTGCAGAAGACGGTGTCTTGT  
ACCCAAAGTCGAGGGTTCAGCTGAGTAG

>ArMLO11 ARAIP.SR8Z2

ATGTCGGATAGTGTGCAAGAAGCGCGGTGCTTGGCTTGACTCCTACATGGTCTGTTGCCACTGTGTTGACCATCTTTGT  
TGCTGTCTCTTTGCTTGTGGAGCGCTCCATTACCGATTAAAGCAATTGGTTGCGGAAAACATAATCGAAAACCATTGCTTG  
CTGCTTTGGAGAAGATGAAAGAAGAGTTGATGTTGCTTGGATTTCATATCACTCCTACTAACAGCTACCTCAAGAATTATA  
GCCAATATTTGCCCTCCATCAAAGTTCTACAACAGTGTCTTTGCTCCATGCACAAGATCTGAGATCGATGAAGAAATGGA  
AGATAATGGCTCCGAAGGACGTAATTTATGATGGCTTTTGTCTTATCCAAGCTTAACTCGGAGGATGCTGAATGGCATGA  
ATAGAAGCTCCTGCAAAGAGGACGTTATGAACATTTGTGTATGAAAGTCTAGAGCAATTGCACCGGTTTTATTTTT  
GTCATGGCAATAACACATATATCTTACAGTTGCCGTGACGATGTTGTTAGCAATTGTGAAGATTTCATAGTTGGAGAGTGTG  
GGAGGATGAGGCTCATATGGATCAGCATGGATCTTTGGCAGTAATCACGAGAGAGTTGACAATGCGAAGACAATCGTCCT  
TTGTCAGGTTTCATACATCAAATCCAATGGCCAGAAATAGTTTCTCGTTTGGGTGACATGTTTTTTCCGACAATTCGGC  
CATTCGGTGGTTCTGTGCTGACTACCTTACACTTTCGTAAGGATTTTATCTTGAATCACAACCTCACATTAATAATATGATTT  
TCACAGCTATATGGTTCGATCTATGGAAGAGGAATTCCAAAGGATAGTTGGTGTGAGTGGCTTACTCTGGGGATTTGTTG  
TTGCTTTTCATGCTTTTTCAACATTAAGGATCAAATCTCTATTTCTGGATAGCTATCATTCTCTTGTCTTTTTGGTGGGA  
ACAAAGCTCCAGCATGTTATGCAACGTTGGCATTTGGAGAATGCCGGAATCACTGGTTACTTCTCGGGATCAAAGTTGAG  
GCCTCGCAGCAACTTTTTCTGGTTCAATAAGCCTGAACATTTGCTATCCTTGTATCCACTTCAATCTCTTCCAAAATGCGT  
TTGAAATGGCTTCGTTCTTTTTGGTTCTGGTGGCAGTTTGGTTATAATTTCTGCTTTATCAGGAATACATGCTTTGTGTAC  
TTAAGGCTAATCTTAGGTTTTGCAGGACAGTTCTTGCAGTTACAGTACTTGGCCACTATATCGCTCTGTTTACACAGAT  
GGGAACAAACTATAAGGCTGCATTTGATTTCCACAGAGGATAAGGGAGACAATCCATGGATGGGGCAAGGCAGCTAGGAGAA  
AGAGAAGGCATGGTATGTTGCGCGATGATTCCACCATTACACGGACACGAGCACTGTACTATCTCTCGAAGAAGACGAT  
AGAATGGTTGATATCCCTGAAACTGGTACTGACCATGTCACTGGAACCTGAAGTAGAATTACAACCCGTAGCAGCTGCTAC  
GGCTACTCCTTCCGCGCCAGCTGCAAATGAAGCTTCAAGTAGGGCTGCCACACCCTCCTTCCGACCATCGGCTTCAATAT  
CTTCTGTCGGGACCATTTCAGTTTTGAGAGCAGAATCTATTCCAAGATGTTCTTCTATGCCAATGCCAAGTGAAGGTAA



>ArMLO12 ARAIP.WMV74

ATGAGTATTAGAGGTGTTGATGAGGAACAAGACATAGAATTAGAGTTCCTCCGACGTGGGTGGTTGCCGTTGTCTGCTC  
CGTCATCGTTGGCGTCTCCTTCGCCGTCGAGCGCTTCCTTCATTATGCCGAAAGCGTCTTAAGAAGAAGAATCAGACCA  
CACTCTATGAAGCTCTGCTCAAAATCAAAGAAGAGTTGATGGTGTGGGTTTTATTTCTCTGTTTCTATCGGTATCACAA  
CGTGGGATAACAAAATGTGTGTCCCAAAAAGTTGGAGTACCACATGCTTCCATGTAGTCTTAAAGAAAAAGAAGATT  
AGAAGCTGAAACAAAATATTACTTTCATCACATTTTCCAGAATTTCTTTCTTTCTTTCTTTCAATAATCTTAGACACCTTCTTG  
CTCTTGCTCATGCCAAGTAGCCGAGAGGCTCAGCTTCAATACTGTGCTCTCAAGAACAAGGTACCTTTATTATCCAAC  
GAAGCAGTGCATCATCTTCATATCTTCATATTTGTCCCTAGCTATCGCTCATGTAACGTTTTGTGTTCTCACAGTTGCCAT  
TGGATTATTAAGGATACGTCAGTGGAAAGCAATGGGAAGACTCTGTTGCAACTCAAAAACAATGAGACACACCGAGATTTGG  
AGTCAACAGTTACTCTTGTTCACCAACATGCGTTTATCAGAGATCATTTTATAGGGATAGGCAAAAATTCGACCCTACTG  
GGTTGGGTGAAATCTTTCTTCAAGCAATTTTATGGATCTGTGACAAAATTAGATTATGTGACATTAAGGCTCGGTTTTAT  
TATGACCCACTGCAGGCGAAATCCAAAGTTTAAATTTTCCAAAGTACATGATTCTGTGCCGTTGAAGATGATTTCAAGAAAG  
TTGTTGGTATAAGTTGGTATCTTTGGATCTTTGTGGTCTCTTCATGTTGATTAATATTAACGGTTGGCATACATATTTTC  
TGGATTGCTTTTCAATCCCCTCATACTTCTACTTGTGCTGTTGGGACAAAGCTAGAGCATGTGATAATGGAATTAGCAAATGA  
AGTAGCTGAGAGGCATGTAGCCATTGAAGGCGAATTAGTTGTTCAACCATCAGATCATATTTCTGGTTCAACCGTCTCTC  
GCATTAATCTCTTCTTGATCCACTTTACCCTTTTCCAAAATGCTTTTGGAGATTTCTTATTTCTTCTGGATCTTGGTAAC  
TATGGCATCCATTCTGTATAATGGGACCAATTGGTTACATTATCCCACGGCTCATTATTGGGTTATTTATTTCAGTTACT  
TTGTACTTACAGCACACTACCCTCTATGCAATCGTTACACAGATGGGAACCTCATTTTAAAGAAGACATATTTGAGGAAC  
AATGGAAAGACCTATTTGTTTATTTATGGGGGAGAAAAGGCAAAGAATAATGGAGCAAAGCTGATGAAAGCCATGGTGAG  
CATGAAAGAAGGGCATCTTACCTGAGGCCAATACCAATGTCCCCAAAGAAGACAAGTCTAATTGA

>ArMLO13 ARADU.SSV2N\_48N80

ATGGCTGGTGGAGAAAAAGAGCGAACGTTGGAGGAAACGCCAACCTGGGCTGTTGCAATTGTGTGCTTTGTTTTGCTTGC  
TATTTCAATCATCATAGACATATTTATTCATGCTATTGGAAAGTGGCTCAAAGAAAAACAACCTGCTCTTTATGAAG  
CATTAGAGAAGGTTAAAGGAGCTTATCTTGTGGGATTCATATCTCTACTCCTCACGGTGTCCAAAATCCAATTTCT  
AGAATATGCATATCAAAGAATGTTGCTTCAACGTGGCATCCATGTGCTGTCCAAAGAAAAGTAAATCTGGTTACGAAGA  
TTCTGATGATGATGATGGTATGATGGTAATCGTCGAAAACCTTTAGAGTATTTAGGCCACATACCTCGCCGTGTTCTTG  
CTACAAAGGGATACGACAAGTGTGCAGAAAAGGCAAGATGTTTTAAAAAATTATAAAATTTTTTCATATACTACAATGTATT  
ATAACACTAGCTTTGGGAAGAACCAAGATGAGACGATGGAAGAAATGGGAGGACGAAAACAAAACAATTGAATATCAATT  
CTACAACGATCCTGAAAGGTTTCAAGTTTGAAGGGACACAACATTTGGACGAAGACACTTGAGTGCATGGAGTCCGACGT  
CAGTTTCTTATGGATTGTGAGCTTCTTTAGACAATTTCTACGGATCAGTTACTAAAGCTGACTATGTAGCATTACGACAT  
GGATTTATCATGGCACATTTGGCACCAGGAAGTGAAGCCAAATTTGATTTCCAGAAGTATATACATAGATCACTTGAAGA  
GGATTTCAAATCGTTGTAGGAATAAGTCCAATCATATGGATTTTTGCCGTGCTATTTCTGCTGACTCATACTCATGGCT  
GGTACTCTTACTACTGGCTTCCGTTTATCCCATTAACATAATCTTATTAGTGGGTGCTAAGCTTCAAACAATCATAACA  
AAGATGGGACTAAGGATTCAGAAAAGAGGAGAAGTGGTGAAGGTTACCTTTGGTTGAGCCTGGAGATGAACTATTTTG  
GTTCAATCGACCAGGCCTCTTCTCTCTTTGGTTTCATCTTGTCTCTTTCAAATGCATTTTCAAGCTTGCATTTTTGGCTT  
GGAGCACCTATGAATTTCTCGATACATTTTGTCTTTTCAAAAACAACCTGTAGATGTTGTTCTGAGAATTTCAATCGGAGTC  
GTCATTTCAAGTTCTTTGACGCTATGTGACTTTTGGCCCTTTATGCTCTAGTCACTCAGATGGGTTCAACTATGAAAACCAC  
GGTTTTCAATGATAGAGTAGCAACAGCATTTGAAGAAGTGGCACCATAGTGCAAAGAAGCATGTCAAAGATAGTAAGCATG  
GAGAGGGTAACAACAGTGTGACACCATTTCAAGTAGGCCAACCAACCAACTCACGGTCTCTCTCCGGTTTCTCTTTTG  
TATAGGCACACTGTGGGTACAGTGTAGTGTCCAAACCTCCCAAGGATATCCAATATGAAAATGAACAATGGCATCT  
TCAAGGTTCTCTTCAACTACTAGCAACCATGACACTGATGAGAGGCAAGTTGTAGAGCAACCTTCCACACTAGAATCAC  
CTGTATCGGTGCTCAACATGAAATCAACATTAGTTTGTGCGGAATTTCTTTTCAAATAGGCAAAAATAGTAGAGATTAG

>ArMLO14 ARAIP.MQE1N

ATGTCGGATAGTGTGCAAGAAGCGCGGTGCTTGCCTTGACTCCTACATGGTCTGTTCCCCTGTGTTGACCATCTTTGT  
TGCTGTCTCTTTGCTTGTGGAGCGCTCCATTCACCAATTAAGCAATCTGCGGAAAACCTAATCGAAAACCATTGCTTGTG  
CTTTGGAGAAGATGAAAGAAGAGTTGATGTTGCTTGGATTTCATATCACTCCTACTAACAGCTACCTCAAGAATTATAGCC  
AATATTTGCCCTCCATCAAAGTTCTACAACAGTGTCTTTGCTCCATGCACAAGATCTGAGATTGATGAAATGGAAGATAA  
TGGCTCCGAAGGACGTAATTTATTGATGGCTTTTGTCTTATCCAAGCTTAACTCGGAGGATGCTGAATGGCATGAATAGAA  
GCTCCTGCAAAGAGGACAGTTTATGAACCATTCTGTGTCATATGAAGGTCTAGAGCAATTGCACCGGTTTTATTTTTGTCTATG  
GCAATAACACATATATCTTACAGTTGCCCTGACGATGTTGTTAGCAATTGTGAAGATTATAGTTGGAGAGTGTGGGAGGA  
TGAGGCTCATATGGATCAGCATGGATCTTTGGCAGTAATCACAAGAGAGTTGACAATGCGAAGACAATCGTCCTTTGTCA  
AGGTTTACATATCAAATCCAATGGCCAGAAATAGTTTCTCGTTTGGGTGACATGTTTTTTTCAAACAATTCGGCCATTTCG  
GTGGTTTCGTGCTGACTACCTTACACTTTCATAATAGATTATCTTGGAAATCACAACCTCACATTAATAATATGATTTTACAG  
CTATATGGTTAGATCTATGGAAGAGGAATTTCAAAGGATAGTTGGTGTGAGTGGCTTACTCTGGGGATTTGTTGTTGCTT  
TCATGCTTTTCAAACATTTAAAGGATCAAATCTCTTTCTGGATAGCTATCATCCCTGTACCTTGTCTTTTGGTGGGAACA  
AAGCTCCAGCATGTTATTTGCAACATTTGGCATTTGGAGAATTCGGGAATCACTGGTTACTTCTCGGGATCAAAGTTGAGGCC  
TCGCAACGAACCTTTTCTGGTTTCAATAAGCTGAACATTGCTTACTTCTGATCCACTTCTTCTTCCAAAATGCGTTTA  
AATTGGCTTCTGTTCTTTTGGTTCTGGTGGCAGTTTGGTTATAAATTCCTGCTTTTATCAGGAATCACTTGTCTTGTGATTA  
AGGCTAATCTTAGGTTTTCAGGACAGTTTCTCTGCAGTTACAGTACTTTGCCACTCTATGCGCTTCTTACACAGATGGG  
AACAAACTATAAGGCTGCATTGATTCCAGAGAGGATAAGGGAGACAATCCATGGATGGGGCAAGGACGCTAGGAGAAAGA  
GAAGGCATGGTATGTTTGCAGATGATTCCACCATTACACGGACACGAGCACTGTACTATCTCTCAAAGAAGACGATAGA

ATGGTTCGATATCCCTGAAACTGGTACTGACCATGTCACTGGAAGTGAAGTAGAATTACAACCCGGTAGCAGCTGCTACGGC  
TAGTTCTGAAGCTATTTGA

>CaMLO1 LOC101504273

ATGGCTGGAGCAGCTCTAGGAGAAAGAACATTGAAGGAAACACCAACATGGGCTGTGGCTGCCGTTTGTGCAGTGTTCAT  
CATCATCTCTGTATTAATTGAATATGGAATTCATTCACCTTGAAGGAGGTTTTCACAAAAACACAAGAAGGCCATGAGTG  
AAGCCTTGGAGAAAATAAAAGCAGAATTAATGCTATTAGGATTTCATATCCTTGTACTTACATTTGGTACAAAATATATT  
GCAAAGATATGCATCCAGTGAAGTTAGGTGATAGCATGCTTCCATGTAAGAAAAGAGAGAGTGAAGAAGATTCAAAAAGA  
TGATAGGAGGAGGTTACTTTCTTTTGGATGATGATAAATTTGGTATGGAGGAGAAGTTTGGCAGCAGCAGCTGGTGGTGATG  
ACTATTGCTCAAATAAAAAATGAGGTGCCCTTTAATATCTCAATCAGGGGTGCACCAATTGCATATATTTATATTTCGTGCTG  
GCAGTTTTTTCACATTTTCTACAGCGTCATGACTATGGTACTAGCCCAGCAAAAATGCAGAAATGGAAAGCTTGGGAAAT  
GAAACTTCCCTCTGTGGAGTACCAATTTACACATGATCCTGCAAGGTTTCAGATTTGCGCATCAAACCTACATTTGTGAAGC  
GTCACCTCAGGCTGGTCTAGGAAGCCAGGAATACGATGGATAGTGGCATTCTTCAGACAATTCTTTGCGTCTGTGAGTAAG  
GTGGATTACATGACTATGCGTCATGGATTTATTAATGCACATTTTGTCTCCAGATAGTAAATTTGACTTCCATAAATACAT  
CAAAAGATCAATGGAGGACGATTTTAAAGTGGTTGTTGGTATAAGTATTCCATTATGGGCATTTGCGATTATCTTTCTGC  
TTATGAATGTTTACAGTTGGTACACACTCATTGGTTGTCAATGGCGCCACTAGTGATACTTCTATTAGTGGGGACTAAG  
CTTGAACCTCATAATAATGGAAATGGCCCAAGAAATCCAAGATCGAACTACAATTGTAAGAGGTGTACCCGTTGTAGAGCC  
CAACAACAAGTATTTTTGGTTTAAATCGACCCCATTTGGATCATCTTCTTGATTCAATTTACCTTATTCCAGAATGCTTTCC  
AAATAGCCTATTTCTTGTGGACGTGGTATGAGTTTACGATCACATCTTGTCTCCATGAAAACCTTGGCCTAATAGTCACA  
AGGGTTGCTCTTGGGCTAGCCTTACAAGTCCATGTCAGTTACATAACGTTTCTCTCTATGCACTAGTCACACAGATGGG  
ATCACACATGAAGAGAGGAATATTTGAGGAGCAACAACAAAAGCAGTTAAGAAATGGCAAAAAGAGTGCAAGAGATAAGA  
GGAAGTTAAGGAAAGCAGGAGGAGGAGGATCAATAGATGTTTCTTCAAGTGGAGAAAACAACACCAAGTCAAGGAACA  
TCACCTATGCACTTGCCTTCAAAAATCAAACCTAGTAGCCACACAGACACAGATAGTGTCTCTATTCTCCAAGATCATA  
CCAATCTGATCAAACCTGACTTTTTCAGACACAGAGGGATCTACACACCGATTGAATCTGGATCAAATCATGTCAACCCAC  
AACACAATCCACCAGGGAATCAATTAACCTCATAATATTGATTTTTCTTTGATAAGCCTTAA

>CaMLO2 LOC101500098

TTCAATTTCTTAATACAATTTCTTCAAAAATAAACTCCATAAGGACTTTTTGTGTGTTTATGCTTCTACATTTCTTTTG  
AGTATTGCAACAATTTCAAAAAGAAAATATTAATTAATGGCTGCCCAAGTTTATGAACGAACTTTGGAAGAAACACCAACT  
TGGGCCGTTGCAGTTGTGTGTTTTGTGTGCTTGTCTATTTCAATCTTAATTGAACATATTATTTCATGTTATTGGAAAGTG  
GCTAAAAAAGAAACAAAAAATGGTCTCTATGAAGCATTGGAAAAGGTCAAAGCAGAGCTTATGTTATTAGGATTTCATAT  
CATTGCTCCTAACTGTGTTCCAAGATCCTATTTCTAAAATTTGCATATCACAAAAGTTGGAAACACTTGGCATCCTTGT  
TCCAATCCAAATAAAAAGAGTAAATCTAATGAAACATCTGAAAATGAAAATAATGATAGAAGAAAACCTTTTGGAAATATTT  
TGATCCTATACCAAGGCGAATTTCTAGCTACAAAAGGATATGATAAGTGTGTTGATAAGGGTAAAGTTGCTTTAGTTTCTG  
CATATGGAATTCACGAGCTCCATGTGTTCAATTTTTGTGCTTGAATATTTTCATATCCTACAATGCATAATAACATTAGCA  
TTGGGAAGAATCAAGATGAGGCGGTGGAAGAAATGGGAAGATGAGACAAGAAGTGTGGAATATCAATTTCTATAATGACCC  
TGAGAGGTTTCAGTTTGAAGGGACACAACATTTGGACGAAGGCACTTGGACATGTGGTCTCAATCAACCATTTTCATTAT  
GGATTGTTAGCTTCTTCAGACAATTTTTTGGATCTATTAATAAAGTTGATTATTTGGCACTACGACATGGATTTGTGATG  
GCACATCTTGGCCAGGAAATGATGCACAATTTGATTTCCAAAAGTATAAGTAGATCACTTGAAGGATTTTAAAGT  
TGTAGTAGAATAAGTCAACCACTGGTCTTTCGCAGTGTATTTCTTACTAATACTCATGGGTGGTATTCTCATT  
ATTGGCTTCCATTTCCCATTAATTAATTTTATTAGTGGGTGTTAAGCTACAAATGATCATAACAAAGATGGGACTA  
AGGATTTCAAGATAGTGGGAAATAATCAAAGGTGCACCTTTGGTTGAACCAGGAGATCATTTTTCTGGTTCAATCGCCC  
CGATCTTCTTCTTTTTTATTGATTCATCTTGTCTCTTTTCAAGATGCCTTTTCAACTTGCATTTTTTTCTTGGAGTACTTATG  
AATTTCTCCGTAACCTCTTGTCTTCCATAAAAACAACCGCAGAAATTTATCATTAGACTTACACTAGGGGTTGTAATACAAAT  
CTATGTAGCTATTCAACTTTGCTCTTTTATGCTCTAGTCACTCAGATGGGTTCAACCATGAAACCAACAATTTTTTCATGA  
AAGAGTTGCAACAGCACTTAAAAGCTGGCACAACACAGCCAAAAGCATGTGAAAGAAAGCAAACATTTCAAACAACACGA  
CACCATTCTCCAGCAGACCATCAACACCAACTCATGGCATGTCTCCTGTCCACTTACTTCATAGACACACTGTTTCCAGC  
AGTGACAGTCTTCAAACCTTCAACTATGAAAATCAACAATGGGATAATGTTGAAGGATCAAATTCACCAACAATCAACCA  
TACCGAAGCAGATGAAATTCGGATACCAACCGAGTTGCCGTGAAGTAATAGACATGAAATTAGTATTAGTTCAAAGATT  
TTTCTTTGAGAAAGCGATATATTGTTAGCGATTAGAATTTGTAGATATCGAAAACCTAGTTCAATGTATAGCTTTAGTTCAA  
TGTCGTAAGATATAACAGCTTGTTCGAAATCTGCTGCTACAATAGGCCACTATAACTGTACTTGGACAACATTTGTATTAA  
ATAATATATCGCAGAATAATAGCGATTAATTTGTTTGAATTTTACTATATTTTAGTGTGTTGTAGACGCTATTTAATAA  
AACTTTAAGAATGGAGGAAAT

>CaMLO3 LOC101490933

AACAGTTGGCAGCAGCACAGCTTTTAAATTAATTAATAATAATGAATGGCGCTCTGTTACTGATGATAATGTAATTTA  
AAGAAGGGAGAAAAGGTAGAGAGAGAGAGAGAGAGAGAGAGAGAGAGAGAAATGAGTGGTGGAGAAGAAGAAGAGGAGACAACA  
CTTGAGTTCACTCCAACCTGGGTAGTGGCTGGCGTTTTGCACGTGTGATAGTTGCCATTTCCCTCGTCGCTGAGCGTTTGT  
TCACTATGGTGGAAAGTTTCTGAAACGCAAGGATCAAAGCCACTCTACGAGGCTCTCCAGAAGATCAAAGAAGAGTTGA  
TGCTTCTGGGTTTTATTTCACTTCTTCTGACGGTTTTCAAAAACAGCCTCACCAAAATATGCGTTTCTCCAGTGTATTG  
CGCCACATGCTTCTTGTACCCTGAAAGAGAAAGAGAAAGCGAATCAAGTATCACATTATTCTGCTTTCTCTTTTCTG  
ACTTGTAGGCGCATTTCTCGCCAATGAAGAAGATGAACATCTTAAAACCCCTTTCTGTGCTCGCAAGAATAAGGTTCTT  
TATTATCTCTGGAAGCTTTGCATCACCTCCACATCTTTATTTTTGTACTCGCCGTCGTCCACGTACCTTTTTCAGTTCTC  
ACTGTTGTTTTTGGAAAGCGCAAGAATACGTCAGTGGAAAGCACTGGGAAGATTCTATTGCAAAGCAGAATATGATACTCA

CCAAGTTCTCAAACCAAATGACTCATGTTGGACAGCATGAATTTATCAAGGGTCGCTTTTTCGGGTTTTCGGCAAAGACT  
CTACTTTAATCGGTTGGTTGCAATCCTTTTTCAAGCAGTTTTATGGTCTGTGACAAAGTCAGATTATGTGACATTAAGA  
CTTGGTTTTATTATGACCCACTGTAAAACAAACCAAAGTTAATTTTTCAAAAGTACATGATTTCGTGCCCTTGAAGATGA  
TTTTAGGCAAGTTGTTGGTATAAGTTGGTATCTTTGGCTCTTTGTGGTTCATCTTTCTGTTGCTAAATATCAATGGTTGGC  
ATACATAATTTCTGGATTGCTTTTTGTTCCTTATCTTTTACTTGTGTGGGAATAAGCTGGGGCATGTAATAACCCAA  
TTAGTCTCATGAAAGTGGCTGAAAAGCATGCAGCCATAGAAAGTGCATTTGGTTGTAACAACCATCGGATGAACATTTTTGGTT  
TCATCGGCCCGCGTTGTTCTCTTCTTGATTCACCTTTATCCTTTTTCAAATGCTTTTTGAGATAGCATTTTTTTTTCTGGA  
TATGGTTTACATATGGATTTGACTCCTGTATAATGGGGCACATTCGGTACATTGTTCCAAGGCTCGTAATTGGGGTATTT  
ATTCAGGTACTGTGTAGCTACAGCACCCCTACCCTGTATGCACCTGTTACACAGATGGGAACCTACTTTAAGAGGGTAAT  
ATTTAATGAGCATGTGCAAGACGGCCTTGTGGTTGGGCACAAAAGGTAAGAAAGTGGTAAAAGCTGATGGCC  
AAGGAAGTTCTCATGAGGGTTCTAGTACAGGAGTTGAGCTTGGATCAGTTTTCCAGAAGAGGGCATCGGCACATGAGACC  
AATAATGGCCAAGGAAGTTCTCATGAGGGTTCTAGTACAGGAATTCAGTTTGGGTGAGCTTTCCAGAAAAGGGCATCTGC  
ATCAGAAGACAATACTCCTCCTATCACCAAAACCTGATGGATCCAACCTGAGTCTGGTTGTCCAGGTTATGGTAATAAGATG  
AAGCCAATAGGTGGGAGCTGTGCTCTGTAGGCTTGTCTTTTTTGTGAAGTTGTATAACATATTGCAGTTTTCTTTTATCT  
TATTTTCCATGCCAGCGTGGTGGTGGGCATTACTGTAGGCATGGGATGAAAGATGTATATATAGGCTCAAGATTCTAAG  
ATCTGCTAGCACACCTACTTAATAGTTACTGCAACATGTCTTCTGGTTTTTGTCTGTGTGCTTCGCCTAATACTTTCCAG  
TCACCGTACTCTACTCAGAATTGAAAAGCGTTTTCAATTTTTTGTCTGATAAAGTACAAGACAAATTGGAGGGATGGG  
ATTGGGAAGCTTCTTCTCTGTTTGTGTTGCACTTTTGCTTCA

>CaMLO4 LOC101505951

ATGGAGAAAAGAAAATGGAAATGGAAGATCCTTAGCTGAAACTCCAACCTGGGCTGTTGCAACTGTCGTTGCTCTTTTAGT  
TTCTCTTAGTTTCTTATCTCATGGCACATGAAAAAATTTGTTAAGTGGTTGGATAAACTAAGAGAAAATCGCTTCTTT  
CCGCTATGGAAGAGATGCAAGAAGAACAATAGCTTTTTGGGCTTCTGTCTATTGCTGATGGGGCATTGGATTCTTTTTGTG  
GCTAAGATTGCGTTAAGTTCATCAGTATTAAGCAGCAGATTTTTTCCATGTGCAATGGAGAAGAGTTTTGGAATTTGTGAA  
ACAAAGTTGCATGGTCAAATTCAGAATATTCAAATCAAACAATTCTCAAAGAGCAAGCGCATCATGGCAGGCATAATTATT  
GTCCTAAGGGTTCATGAATCATTGCTTCATATGAAAGCCTTGAGCAGCTTCATCGCTTTGTGTTTGTCTAGGGATCACG  
CATGTTTCTTATAGCTTTGTTTCTGTAGCCCCTGGCCATGATCAAGATATAACAGCTGGAGAAGATGGGAAAATGAATCAAA  
GACTATGGCTGTACAAAGTTTACAAGATACTTCACAACTACTTCAACTTCAAGCATAAGATTGAGGAGGCTTAGTACAT  
TCATTTTTCCACCACACATCCCATCCTTGGAGTTCATCACAAGTTCTTGTGTTGGCTGATATGTTTTCAGTCGCCAATTCTGG  
AGTTCCATCAATCGAGCTGATTACATGGCATTCGCGTTAGGCTTCACTAATCATGACCTTCTTAAACATACGATTT  
CCACAACATACATGCTTTCGAAGCATGGATGAGGAATTCGTGTGACATTGTAGGTGTTAGTGTGGTTCTCTGGATATATGCCA  
TATGCTGTATTTTTCTAAATTTTTCATAGAAGCAACTTTTACTTTTTGGCTTTTCTTTGTCCCAGCAATTTTGTATCCTCATA  
ATCGGTACTAAATGTCATCGAGTGGTTGTAAAGTTGGCGGTTGAAGTAAGAGATCATTGCCCATATATGAAGCCTCATCA  
GTTTAACTTAAGAGATGAGCTCTTTTTGGTTTTGAAAACCATGGATTCTTTGAGGTTAATACAATTGATATCCTTCTTGA  
ATGCATTTGAAATGTCAACATTTTTATGGTCTTGTGGGAAATTAATGATCCTTCTTGCTTCATGAACAACCGAACATAC  
GTTGCGATCCGATTGTCAATTCGGGGTTGTCTCACAATCTGGTGCAGCTTCATAACGTTTCTCTCTATGTTATCATTAC  
ACAGATGGGATCAAGATTAATAAATCAGTGATATCTGAAAATGTAAGAAAATCACTATCTAAATGGCATAGAAGAGTGA  
AGGCTAAACGAAGTTCTCTTATGCACCTTACTAAAACATCACCACATCATTGGATTTTCTGCTGTATGGAATTGAC  
AATTCAAATTCAAATAAATCTGCCTTCATCAGTGAGACTGAGGAAGGAAGTTCTCAGGAACAAAAGACAATAGTCTTTT  
TAACCTTGATGATGTGTCAATGACTCAAAAGCTATGA

>CaMl05 LOC101503406

TCCAGAGTCTAAGCGTCACTTGTTCCTCTCCATTCAATTTGCAGTGGTTTTGTAGGTTAGAGTTAGAATAGAATGCAACATA  
GGAAAAACAATTTGATTTACACTTGCATCTGTACATGAATGCAATAACAACAACATATGGAAAACAATTTGGTTCTCTTG  
AACGAATGCACGAGGATGCCATCAAATTAATTTGTATCCTCAATATTTTTTTGATTACATAAAAACCTCGTATTCTTAAACA  
ATTCTCATAATCATCGTTCTAATTTGAATATTAATTTTATTATAATATATCATAATAATAATCAATAATAATGTGCG  
GGAGGAGGAGGAGCGGTGACGAAAGGCAGCTAGATGTAACCTTACATGGGCTGTGCTGCGGTTTGTGCAGTTATTGT  
TATTATTTCCATATCGTTAGAAAACCTACATACATAAAAATCGCAAAGGTGTTTGAAGAGAAAAGAAACATGCTTTGCTAG  
AAGCTTTGAAAAGATTAAAGCCGAGCTTATGGTTTTGGGATTTATTTCTTTGCTTTTTAACATTTGGGCAAAACTACATA  
TCAAAAGTTTGTATTCCAACGAGGTATTCAAATACTATGTTGCCATGTCTTCCCTTGGATCAACGACAAGCTGGTCATCC  
AAGTGAGCCGGCACAAACGGGACATGAGCCTCCAACAACGGGACATGAGCCTCCAACAACGGGACATGAGCCTCCAACAA  
CGGAACATGAGCCTCCAACAACGAAACATGAGCCTCCAACAACGAAACATGAGCCTGCACCAACGAAACATGAGCCTCCA  
CCAACGGCACATGAGGCACCGGCCGAGGAGGCTGAGCCGTCTAAAGGCGAACATCATCGCAGACTCTTATCATATGAACG  
TAGGGTTCTCTCCGGTGGTGGTGGAGGACACGGATGTAATTTGGGGTACGTGCCTCTTATAGCAGTGAATGGGTTACATC  
AATTACATATTTTTCAATTTCTTCTTGGCAGTCTTCCATGTGATATACAGTGCCATTACAATGACACTTGGTAGAGCAAAG  
ATTAAGGATGGAAGGAATGGGAACAGGACCATGTCGTGGATGAAGATGCCTTGAATGATCCTAGAAGATTGAGACTTAC  
TCATGAGACATCATTGTTGAGGGATCACAACAGTTTTTGGACTAAAACACCTGTTTTCTTTCTATTTTTGTATGTTTCTTTA  
GACAAATTTTTAGATCGTTTGAAGGGCTGATTTACTTTGACGATGCGACATGGATTTGTTTTCTTGTCCATTTAGCAGCTGGA  
AGTAAATTTGATTTTTCAAATAATATCAAAGGTCATTAGAAGATGACTTTAAGGTAGTTGTAGGAATCAGTCCACTACT  
TTGGGCATCAGTGGTGTATTTTTGTCTTTTAAATGTCCACGGTTGGCATGCTGCATTTTGGGTTTTCTTTCTTCCACTTG  
TAGTGATTCTAGCTGTTGGAACAAAGCTTCAAGCAATTAACCTCGAATGGCACTTGCATACAAGAAAGACATGCAGTA  
GTGCAGGGGATTTCTTGTGTACAAGTTTCTGACAAGAATTTTTGGTTTTGAATGGCCTCAGTTAGTTCTTTATCTCTCCA  
TTATGTTCTCTTTTCAAGATGCATTTGAGCTGACATTTTTCTGGTGGACATGGTATGAATTTGGTTGGGCATCTTGCTTTT  
ACGAGGATGATAGTTTTATGATTTGTGAGAGTTGCTCTTGGGTTAGGTGCTCAATTTGTTTGCAGCTATATAACACTTCT

CTCTATGCATTAGTGACTCAGATGGGATCGACAATGAAGAGGTCAATATTTGATGAACAAACATCAAAGGCATTGAAAAA  
TTGGCGTAACAAAGCAATGCATAAGAAACCATCAATCAAACGTCCAACCTGAAACAAGAACATTAGGTAGTCCAATGGATG  
ATGGGTCACCATTGGATTCTCCATTAACAAATATAAACACAAGTGCAGAAACAGAATTGCAGGAACATGGCACAGCTACC  
ATACTCACTAGTGTGGATAATGACCACCTATGATAACCGTGACCTTCTAACTGGACCCTGATTCACTCACACTTTATACAT  
AAATACAATATGTTGAATCAATCAATCAAACCTACAAATGCAGGGCTATGGTAATTCATTAATGTAAATAATAACCCATT  
TGTGCACCTTGGGTTCAATAGAGTTTGTCTACTAGTAGAATTAGCAAACCTACCCTAAGCCATTGCATATATAATTTTGT  
GCACCACAGTTCAGATTAGTTGCTATATATATATGCTTGTAAACTAAT

>CaMLO6 LOC101492588

ATGGCAGGAGGAAGAAGCTTAACTGAAACGCCTACTTGGGCTGTTGCCGTTGTTTGCTTTGTTATACTCTCTATTTCTAT  
CATCATTGAACACATTTTCCACATCATAGGAAAGTGGTTGAAGAACAAGCACAAAAGTGCCTTGTATGAGTCACTTGAAA  
AAATCAAATCAGAGCTTATGTTATTGGGGTTCATATCATTGCTCCTAACTATAGGAGAAGGTTTAAATATCAAAAATATGT  
ATATCAGAAAAGGTTGCAGCCACGTGGCACCCTTGTACCAATAATGCAGAGAGGAATTCGGATGATCACCAACCGATAGA  
ACATGAAACCGGTGGCCGGAGATTACTAGCGGCGTGTGCTTCTCAAACAAAACCTCCCGCCGTATATTGGCTGCCG  
GAGGAATCGACAAATGTGCCGCTCAGGGAAAAGTAGCATTGTGTGCATCAGAGGGAATTCATCAACTCCATATATTTATA  
TTGTGCTGGCTGTTTTTCATGTTCTTTACTGCATACCTACTCTGGCTCTAGGCAGAGCAAAGATGAGAAGGTGGAAACG  
ATGGGAAGAGGAAACCAAGACACTTGAGTACCAATTTTCCATGATCCTGAAAGATTAGATTGCTAGTGAGACTTCAT  
TTGGAAGAAGACACTTGAGTTTCTGGACAAAAATCCTGTCTCATTGGATTGTTTGTCTTTTAGGCAATTTGTAAGG  
TCAGTTCCTGAAGTGGATTACTTGACCTTGAGGCATGGATTTATGATGGCACATTTGGCGCCCCAAAGTCACCAAAAATT  
CGACTTTAGACATTTATCAAAAGATGTTTGGGAAGAAGACTTCAAAGTTGTGGTAGAAATCAGTCTCCAATCTGGTTCA  
TCACAGTGTGTTCCCTTGTTCACACTCATGGCTGGCCTTATCTGTGGCTACCATTTGTACCTTTGATTATTGTC  
CTATTAGTTGGGACAAAGTTGCAAGTGATAATAACTCAAATGGGGCTTAGAATTCAAAACAAGGAATGGTGGTAAAGGG  
AGAGCCAGTGGTGCAACCTGGGGATGACCTATTTCTGGTTTAGCAAACCTCGACTTATTCTCCACCTTATTAATTTTGTG  
TCTTTCAGAATGCCCTCCAGCTTGTCTTTCTTTTCTCATGGACTGCGCTTCAATTTGGGTTGACGTCCTGTTTCAATTCGCGT  
ACAGAGGATGTAGTCATTAGAATATCCATGGGGGTCTTTGTTCAAATCCTTTCAGCTACGTCACTCTTCTCTCTATGC  
TCTTGTGACACAGATGGGTTCAACCATGAAGCCAGCCATATTCAACGAAAGAGTAGCCACAGCTCTAAGGAATTGGCACA  
ACACCGCAAAGAAGCACATAAAGCAGAACCCTGGATCGGGGTTTCAAAGCCCAATGTCAACAAGATCCATAACTCCGGCC  
CATTTCTATGTCCCGGCCACATCCTTCTGCTTACCACAGCGAAACGGACACACACCCACCACATCTCCAACAAGACT  
CAACTTTGAGACCTATAATCCCTACGAGGCCTATTCACCCTCACCCTCCAACAAGGTTGAGGCCCGTGCTACTTCTTCTA  
GCTCAATTTATTTTTCATGAAATGGAAATGGGTCACTTGGCTCATGATCATGAACAAGAGACCAACAAGCCCAATTGTGTT  
TCTGTGGGCTCAGGCCTGACTCAACTTGAGATTGATGTCCAACACAGCGACGAATTTTCAATTTCTAAAATGGCCACAAA  
TAACTTAAAATGA

>CaMLO7 LOC101501959

TTGCAGTTGTAACATTAAGTCATAAACACAAACAATAAAAGTAGTTAATGTTGTTGAAATTCAAATATTGACACACACAC  
AACATGAGTGGTGGTGGAGAAGGAGGTGAAGAAGGACCAGATTTGCAATTTACTCCAACATGGGTTGTTGCTCTTGTGTTG  
CACTGTTATTGTTGCCGTTTCATTTGCGGTTGAACGTTCTCTTCAATTATGTTGGCAAGTTTCTCAAGAAGAAAAACAAA  
AAGCACTCTTTCAAGCCTTGCAAAAAATCAAAGAAGAGTTGATGTTATTGGGTTTTATTTCTCTGTTTCTGACGGTAACA  
CAGAAATAGAATTACAAAAATATGTTTCCCTGAGAATGGACTCATCATATGCTTCTTGTAGTCTTGATGAAAAGATGA  
AGAATCCAAAAAATCCACTTACATTTTTCAGACTTTTTCTCTTCCAATGATGTTTTCGGCCTACTAGGCGCCTTTTAG  
GTGATGACCATCCATCAACAGAAGAAACACTTGGATATTGTGCTGCTAAGGGCAAGGTGCCTCTATTATCAGTGGGAAGCA  
CTGCATCATCTGCATATCTTTATTTTTGTCTTAGCTGTTGTTTCATGTGACTTTCATGTGTTTTGACTATAGTTTTTGGAGG  
ATTAATATTTCTGTCGGTGGAAAGCACTGGGAAGACTCTATTACAGATGAAAATCATGAAACACAACATGCGCCAGATCGAA  
CTGTGACTCATGTTTCATCAACATGCTTTTATCAAGGATCATTTTACTGGTTTTGGCAAAGATTCTGCTATAATGGGATGG  
GTGAGATCCTTTTTCAAGCAATTTTATGGATCTGTTACAAAGTTGGATTATGTGACATTAAGGCTTGGTTTTATTATGAC  
TCACTGTAAGGCAAATCCAAAGTTTAAATTTTACAAATACATGAATCGTGCCCTTGAAGATGATTTCAAAAAAGTTGTTG  
GTATTAGTTGGTATCTTTGGGCTCATGTGGTCTCTTTTTGTTGCTTAAATATCAATGGTTGGCACACATATTTCTGGATT  
GCTTTTATTTCTCTCATTTCTTACTTGTGCTGTTGGAACAAAGCTAGAACATGTAATAATTCAATTAGCTCATGAAGTAGC  
TGAAAAACATACAGCCATAAAGGTGAATTAGTTGTTCAACCATCAGATGATCACTTCTGGTTTTCATCGTCCACGCATCG  
TCCTCTTCTTGATTCACTTGATCCTTTTTCCAAAATTTCTTTTGGAGATAGCATTCTTTTTTTGGATACTGGTCACATATGGT  
TTTGATTCATGTATAATGGGAAGAATTCGCTACATTATCCAAGGCTCATTATTGGGGTATTTATTTCAGCTGCTATGTAG  
TTATAGTACCCCTACCATTGTACGCCTTGTCCACACAGATGGGAACCTCAATTTAAGAGTGTTATATTTGATGAGCAAGTAC  
AAGCAAGGCTTGTGGTTGGGCACAAAAGGCAAAGAAGAAAGGATTAAGAGGTGATAATAACCAATCTAATCAAGAAAAGT  
GCTCATCATGGTTCAAGTGTAAATATTCAGTTAGGGTCAATATTTAGAAGAGGATCAGTCCCAGAAAACAATACTATTGT  
TTCTAGAGATGAAGAGTCTGGATGAAAAATAGTCATGTAACAAAATGTTAATAGTTATTATATATTAATATTTTTTT  
TTAA

>CaMLO8 LOC101508058

CTTCATTCAACTAATAATCAAAAATAAAAACAAAACACTCTCAGTAGCTTCTTTTTTCTTCTTGGATCCCATCTACCACT  
TATTTCTGTGTTTTTTTTTTTCAATGAAAGGTTTTAAACTTTTTGTCATTAGAACTAAAGGGTTGAACTGTGCTGTGTTGATG  
TGAATAAGAAAAAATTAATGGAGGATGTTATGCATAGAGGTGCTTCTCTGGCTGAGACACCTACATATTCAGTTGCATCT  
GTTGTTACTGTCTATGGTCTTTGTCTGCTTCTTGGTTTCCAGCGTTCTATCTACCGCTTTGGAAAGTGGTTGAAGAAGACAAG  
AAGGAAGGCACTTTTTGTCTTCACTGGAGAAAATTAAGGAAGAGCTGATGCTGCTTGGACTTATCTCTTTGTTGTTGGCAC  
AAAGTGCAGGTTGGATCTCTGAAATTTGTGTAAATTCATCGCTTTTTTCCAGCAGTGCATTTTATACCTGTGCCGAACAACAC

CTTGGCACGATTGAGAATATCATGATTGAAAACCTCTTCCTCTTTACCTGATGAACTAATATTCCAAAGGGACTAAGTAG  
TGTCGCACTTCATCAATGTGGAGAGGGCCATGAACCAATTTGTTTCATATGAAGGTCTTGAGCAGCTGCACCGGTTTTTAT  
TTGTTCTCGGGATTACTCATGTTCTGTATAGTTGTCTGGCTGTGCTTTAGCGATGAGCAAGATCTATAGTTGGTGCAGA  
TGGGAAAATCAGGCTGCAATGGCAACTGATGCAAAATTTGCAAGGAAAGAAAAACAAGGTGATGAGGCGGCAAATAACCTT  
TGTTTTCCATCGCACTTCTCATCCGTGGAGCAGGAGTCCAATACTAATTTGGATGCTATGTTTTCTGCGTCAGTTTTAGGA  
GTTCTATACAAAAATCAGATTACCTTGGCTCCGGTCTTGGTTTTCATCACTGAACTAATAAATGGCCATTTGATATAAATTT  
CATAAAATATATGGTTTCGAAGCATGGAAGACGAATTTTCATGCCATTCTAGGAATAAGCTGGCCACTTTGGATTTATACCAT  
AGTTTGCATATTTGTGAACATACATGGTCTGAATATATACTTCTGGATCTCCTTTATCCCTGCAATTCTTGTGCATGATAA  
TAGGTACAAAACCTTCAACATGTTGTATCTACTCTAGCACCTGAAATCAGAGAGCAGCAGGGTCCATCTGCTAGAACA  
GTAAAGCCACGCGACGGTCTTTTTTTGGTTCAAAAAACCAGATATATTTGTTATGGCTAATACAGTTTGTGCATATTTTCAGAA  
TGCCTTTGAATGGCTTCATTTATTTGGACATTTGTGGGGATTTAAAGAAAAATCATGCTTCATGAGACACCATTACATGA  
TCATCATTCGGTTGACGTCGGGTGTTTTTTGTTTCTGAGTAGCTATATGACAGTGCCACTTAATGTAATAGTTTCA  
CAGATGGGATCGCGATGTAAGAAGGCGCTAGTGACAGAGAGTGAAGAGAATCATTGCACAGTTGGTGTAAAGAGAGTAAA  
ACAGAAGTCTAAGAATGAGTCTATGCACTCACATACAGCTAGATCAGTATGTTTCTTAGAGTCAACAATCGATGAGAGGG  
ACGAGATAACTGTGGTATCCGGCACATTATCTCGAACCACTTTCATTAGACTTAGAGTCTTTGAATCAGATAACAGTTACT  
TCAGTAGACCAGCTGAACCTTTGTGACATCTAACAATCTCCATGATTCAACCAATTTGTCCGAATCTGTACATATTAATTC  
GCCATACAATGATGGAGACCATGTTGGCAATGCAGAGGAGGCTAAAATGAGAGCACTCTTTTTGAATGTTTTCAGAAAA  
CATGATAAATTTTATGTTTTCATATTTAAGTTCTACTGCATTTCAAGCTGGTATCTATAGATTAGTATATATAGATATGA  
AAATCATTTCTCGAACCTATGAAGTATAGTTGTATATATATAAACAATGTT

>CaMLO9 LOC101495573

GTAATTTTTCTTTCTTTCTCATGTTAGCTACTGAGCAGGGGAGAAAACATAATTAGCAACGGTTTTAATTGAAATTAAGAAG  
AACATGGCTGTTAAAGGAGAACAAGATCTCTTGAAGATACACCAACATGGGCTGTCTCAGTTTGTAGTTTCTTTGTTCT  
AATTGTATCTTTGATCATTGAAGCTGGACTCCACAAATTTGACTGAGCATCTAAAGAAAAAGAAAAGAATATCCATGGGGA  
AGGCTTTGGCTAAAACATAAAGATGATGAAATTCGGTTTCGTGTCACTTCTTCTGACAATATCGCAAGTGCCAATA  
TCCAAAATCTGTATCAACAAGGATGTGGCGAATTTCTTCCATACCATGTAATGATTCTATGGAGTCGGAATATCAGTTTCA  
CAATTTATTTGTGAAGCAAAGGGCAAGGTTAGTCTTCTTCAAGTATGGAATTTCTGCAGCTAAATATCTTCATATCCTTTT  
TGGCAGTGTTCATATACTTTTTTGCACATTCACGATGTGCCCTTGGAAAGGCCAAGATGAGAAGATGGAAAAAATGGGAG  
GACGAGACTCAAACACTCGAATATCAGATAGATAATGATTCAAGAAGATTTCCAGTATATAAGTCAAACATTTGGGTGGCAA  
GCGTCATTTGAAATTTATGGAATAACTATTTCTCCGTGCTGTGGATGGTGTGTTTTATGCGGCAGTTCTATAATTCAGTCT  
CAAAGATGATTACTTTGCTCTACGAAATGGGTTTCAATTTGAGCAAAATTTTCAATGGGAAGCAATTTCAATTTCAATTTT  
AAGAAATTTCTTTCCCGTACTTTTTGACGAAGATTTTGAAGAAGTTCGTTGGAATCAGATTTTGGATATGGTTTTTCTCCAT  
ACTTCTCATATTCCTTAGTGCACATGAGTTTTATAACTACTACTGGCTTCCATTTATTCCACTTGTGGTTGCTCTCCTTG  
CGGGACTAAACTGCAATGATAATAACGAATATGCATCTTGATAGTTGCAAGCAAAGCCAGTGATCAAAGGAACCATA  
CTTGTAAGACCAAGTATGAATATTTCTGGTTTTATCGACCCGAATGGCTTCTCCATATAATCAAATTAATCCTTATACA  
AAATTCCTTTCAACTTGCATTTTTTCACTTGGACTTGGTATGAATTTGGTCCAAGGTCTTGCTTCAATAGAGAAAAAGCAG  
ACATTTGCCATAAGGATTTGCATTTGGGTTTAGCTGTACAGCTACTATGTGGTTATGTTACTCTGCCCTTTTATACACTTGT  
ACTCAGATGGGGTCTAACATGAGGAAGGAAATTTTACGGAGCGTGTGTTGAAGGTCTAAAAAGTTGGCAAAAAAAGGC  
TAAGAGATCACTTTTCAAAAAACAACCTCACTTGTAGCAGACACACAGTTTTCAGCTTCTTTACATTTCAAAGCAAGTGAGA  
ATTCAGTAAAGAGTCTTTCAGAGAGTATGCACAATAAGTTGATGATAATGAAAACATGCAATCAATAACAGTGGTACACA  
GGAAGTGGAGAGGAAGAAGAGATAAATTTGCAACTAATAGTAGTGTGTTGAGCAAGAGATGATAATACCAACTGAGGAACA  
TAAATGCTAAGTATCACCAGAGGAATCTATGACGGTGTAGATCTCATTGGAAGCAGTTGGAAGAATGTTGGTAGTAGCA  
GGAGCATAAGGAAAATTTGTTTCAATAGCTGAAGAAGAAGAAGAAAATGAAGATGAAGATGTCACTGTACAAAATACCAC  
ATTTGATTTTCATAGGAATTTGGACTTATAATATTTATTTCAATAAAAAATAAAACAAAACCTGATTCTTAAGCAATAACTA  
TCA

>CaMLO10 LOC101494654

ATGGCTGCAACTGAAAGTGATAGTTACAATAGTTCAAGAAAACCTTGATGAGACACCAACATGGGCTGTTGCTTCTGTTT  
CACTGTTTTTCAATTTTATGATATCCATAGCTCTTGGAGAAGAGTCTTACAAAATTTGGGAATGTGGTTAGGAAGAAGGCAAAGA  
AGGCTTTGCTTGAAGCTTTGGAAAAAATCAAGGCTGAGTTGATGATTTTGGATTCAATTTCACTGTTATTGACTTTTGGG  
CAGAAATACATTTGAAGAATATGTATTTTGAAGAAGTTGCAAAACAAAATGTTGCCATGTCCACATAAAATATAGTAATAT  
AAGTGATGACAAGAAATCAAGTAGTGAAGTGGTAAATGTTAGGAACTTGTGTCTTATGAAGGTAGATTTTTAGCTGCTG  
ATACTCCCTCTTTAAATGCAGCAGGAAGGGGCATGAACCTCTTTTATCTATCAATGGATTGCACCAGTTACACATCTTC  
ATATTTCTTCTTAGCTGTCTTTTATGATGCTTTTATAGTGTATCACAATGCTTCTTGGGAGACTTAAGATACGTGGATGGAA  
GGAATGGGAGGAAGAGACTTCAACTCATGGTAATCAATTTGCCAATGATGCTGCAAAATTTAGGCTCACACATGAAACAT  
CATTTGTAAGAGCTCATAACAGTTTGGGACAAGGATTTGCTATCTCCTTCTATATTTGGTTGTTTTCTTTAGACAATTTTAT  
AGGTCTGTTTCGTAGGGTTGATTTACCAAACTTTGGCAACTGGATTTTATCAGTGTCCATAGCTGCTGGAAGTAAATTTAA  
TTTCCAAAAGTATATCAAAAGATCATTAGAAGATGACTTCAAAGTAGTTGTGGGAGTAAGTCTGTTCTCTGGGCATCAG  
CGTAGTTTTTCTGCTCCTAAACATTTGATGGTTGGCGTACTCCGTTATGGGCATTCTTAATTTCAATTTATTATAATTTT  
GCTGTTGGAACAAAACCTTCAAGTAAATATTAGCAAGGATGGCTCTTGAATAACAGAAAACATGCAATTTTCAAGGAAT  
GCCTCTTGTTCAGGATCAGACAAATACTTTTGGTTAGATCAACCTCAGTTAGTTCTTTCATCTTATCCATTTTGGCTTTG  
TTCAGAAATGCATTTCAAATAACATATATATTTGTGGACATGGTATACTTTTGGGCTGGAAAATTTGTTTCCGTTTGGGCTAC  
AACTTTGCCGTTATAAAAGTTGCTTGGGGGTTGTGATGCTATGTCTCTGCAGCTATATTACCCTTCCATTTATATGCTCT  
TGTGACTCAGATGGGTTCAAGGATGAAGAGGTCAATATTTGATGAACAAACATCAAAGCATTAAATGAAATGGCACATGA

CTGTGAAAAAGAAGCATGTAGGAGAAGTAGTCAAACCTTGGAAAGTCAACCATTGATGGTAGCAACATTGGATCAACATTG  
CAATCCCCCTGGACCAGCACTACACCGTTTCAAACCTACTGGACATTCAACTCGCTCTTCAACTTTTGAGGATCAAGATGA  
ATATGAATCTGATAATGAATTGGAAAAAATAAATTTGATTTCTAAGAGTTGATCAACTAGCAGAAGAAGATCATAGGCATC  
ATAGTGAGGGAGAAGCTAATAATGAAGATGAGTTTCACTTTTCTCAAGCATACTACTATTCAAAGTTGAG

>CaMLO11 LOC101511064

ATGGCAGCAGAGAATGAACAAGAAACAAGGTCAATTGGCCCTTGACTCCTACATGGTCTGTTGCAACTGTGTTGGCCATCTT  
TGTTGCTGTCTCTTTGCTTGTGCGAGCGCTCCATTAACCGTTTAAAGCATTGGCTTCGAAAACTAATAGAAAACCTTGC  
TCGAAGCTTTGGAGAAGATGAAAGAAGAGTTGATGTTGCTCGGATTTATATCTCTCCTACTTACTGCTACCTCTGGCATG  
ATAGCAAATATTTGCATTCGGTCAAAGTTCTACAATAGTGTCTTTGATCCCTGCTCTCAATCTGAGATTGATAAAGAAAT  
TGAAGAGAATGGCTCCGAAGGACGTAAACTATTGATGGCTGCTTCTTACCCACGCATAATTAGAAGGGTGTGAAATGGAA  
TAAATAGAACTCCTGCAAAGTGGCAGGTTATGAACCGTTTGTTCGTATGAAGGCCTAGAGCAGTTGCATCGGTTTCAAT  
TTTGTGATGGCGATCACACACGTATCTTACAGTTGCCTAACAATGTTGTTAGCCATTGTGAAGATTACAGTTGGAGAGT  
GTGGGAGGAGGAGGCTCACATGGATCGACGCAATTTAACAAGAAATTTACTAGGCAGATGACTATGCGAAGGCAATCAA  
CCTTTGTCAAGTCTCATACATCAAATCCATTAGTCAATTTGGATGACATGCTTTTTTTCGACAATTTGGGCGTTCTGTGGTT  
CGCGCTGACTACCTTACACTTCGAAAAGGCTTCATCATGAATCACAACCTTTTCATCAAATATGACTTCCACAGCTACAT  
GGTTCGATCTATGGAGGAGGAATTCCAAAGGATAGTTGGTGTGAGTGGCCTACTCTGGGGATTTGTTGTTTGTTCATGC  
TTTTCAACATTAAGGATCTAATCTATATTTCTGGATAGCTATCATTCCCTATATCTCTTGTCTTTTGGTGGGAACAAAA  
CTACAACAAGTTATTGCAACCTTAGCATTTGGAGAATGCTGGAATTAACCGTTTTCACCTCAGGAGCTAAGTTGAGGCCTCG  
CGATGAACTTTTTTGGTTTTAAAAGCCTGAGCTATTACTTTCCCTAATCCATTTTCTCTTCCAGAATGCATTTGAAT  
TGGCTTCATTTCTTTTGGTTTTGGTGGCAGTTTGGATATAATTCCTGCTTTATTAGAAACCACCGCCTTGTTTATTTAAGG  
CTAATCTTGGGGTTTGGCCGACAGTTTCTTTGCAAGTTACAGCACCTTGGCCTCTATGCTCTCGTCACCCAGATGGGAAC  
AACTATAAGGCAGCATAATCCACAGAGGATAAGGGAACCAATTCATGGATGGGGCAAAATAGCTAGGAGGAAAAGAA  
GACATGGCATGTTTCAATGATGACTCCACAGCTTACATACAGATAACAAGCAGTATTGTCTATTGAAGAAGAGGATCAAATA  
ATAGATGATTCCTTTAAAGACCTTGTCTACTGGTACTGGAGTAGAATTAACAACAGTAAAAACTGTTACATCTATCTCTTC  
ACCTATTGCTAATGAACTTCAAGTAGGGCTGTTACGCCACTCCTCCGACCCTCCGCTTCACTATCTTTCATCAGTACCGT  
TCAGTTCTAGACACGAACCAGTTATAAGATCCTCCTCTATGCCAAGTGAAGATAA

>CaMLO12 LOC101496809

TTTTCAATTAGTTTGGCAAAAAAATAATAATAAAAAAATATCAATAAATTCACGCGCTTATGAACAGACCATTTTCCTT  
TTCAAAAAACCAACTCCAATCAGATAAACTATTACCTTTTTCTCATTTCTAAACCAACCCATATGATCTTTTTACTTGC  
TTTTAATTTTCACTTTTTTTTTCTTCTCTTTTTCCCTCAGTTCTGTGATCATTTTTGAATTTGGGTTGTTGTGTTTGTATTG  
GTTTACCTATGTGTATATCAATGTATAAAAAAAGGTTGTCTTTTTGTGTGGTTTTCATTTTCATGGGTGTTGTTAAATGG  
AGGTGTGGCTATGGCTTCAAGTGAAGTAGTGACAGTTCTAGAGACCTTGATCAAACACCAACATGGGCTGTTGCTTGTG  
TTTGCCTGTTTTTTCATCTTGATTTCCATTACTCTTTGAGAAAAGTATTCACAAAGTTGGAACGTGGCTGGGAGAGAGGCAC  
AAGAAGGCTTTGCTTGAAGCTCTGGAAAAAGTCAAAGCTGAATTTGATGATTTTAGGTTTCATTTTCATTGCTTTTTGACTTT  
TGGGCAGAGCTACATTGTTAGAATATGTATTCCTGCCAATATGGCAGACAAATTTGTTGCCATGTCCATATAGACATAACG  
GATCAAAAAATGAAGAGGAGCATCACAGGAACTTCTACATAGATATTTATCAGAAGATGCTACACCTTACCAATGCAAG  
GAGGACACAAGCCCTTATATCTGTTAATGGATTGCACCAGCTACACATCCTCATATTCTTCTTAGCAGTCTCCTCATGT  
GTTATACAGTGTCTCACAATGCTTCTTGGGAGACTAAAGATACGAGGATGGAAGGCATGGGAGGCGGAGACATCGTCTC  
ATGGATATGACTTCGCAACAGTCCCTTCAAGATTCCGGCTTACACAGAAACATCATTTGTTAGACAGCATGCCACTTTT  
TGGACAAAAATTCGAATCTTCTTCTATATAAGTTGCTTCTTTCAGACAGTTTTATAGGTCTGTGGATAAGGCTGACTACTT  
GACTCTTTCGCAACGGATTTATCACCGTCCACTTGTGAGCGGGAAGTAAATTTAAGCTTCAAAAAATATATCAAAAGATCGT  
TGGAGGATGACTTCAAGGTAGTTATGGGAGTCACTCCTGTCTTTGGGCTTCATTTGTTCTTTTTATCCTTCTAAATGTT  
GATGGATGGCATGCTATGTTTTGGGCATCTCTGATTTCCCGTTGTTATAATTTGGCCGTTGGAACAAAACTTCAAGCCAC  
CTTGGCAAAGATGGCTATTGAAATCACAGAAAGACATGCAGTTATCCAAGGAATTCCTCTAGTCCAAGGCTCAGACAAAT  
ATTTTTGGTTTTGGTCGCCCCAGTTACTTCTTTCATCTTATCCATTTTGCCTTGTTCAGAATGCCTTTCAAATAACATAT  
TTCTTGTGGATATGGTACTCTTTTGGGCTGAAAAATTTGTTTTCATGCTGATTTCAAACCTTGCATAGTCAAAGTAGCTTT  
AGGGGTTGGGGTGTATGCCTCTGCAGCTATATCACTCTTCCATTATATGCTCTTGTACTCAGATGGGATCAAGAATGA  
AAAAATCAATATTTGATGAACAAACGTCAAAGGCTTAAAAAATTTGGCACAATACTGTGAAAAAGAAGCATGGACTTAAA  
CTAGGAAAGTCAAGTGTCCGAACCATGGAAGGAAGCACCACCGATTCAACAGTTCACTCTACAACCCCCACGCTACTGCG  
TTTCAAAACAACAGGTCACCTCAACTCGCTCTGTTTTCAGCCTACGATGACCAAGACGATTACCATTCTGATATTGAAATGT  
CTCCGACATCACCAACATCAAACCTTGTCTTGAAGAGTAGATCATGTTGAGCAACATAACAATAGAAAATGAACATCAAACC  
GAGGTCAAAACCATTTGATAAACAACCAACAATGAGAGGTAGCTTCTCATTTGTCAAGCCTGATGATCATGTGGAAAAGAAG  
CACAGATTAATTAATAGCATCACAAGTTACTTCAATGAACCATTTTTTCTTGTTAGCTTATATATACAGAGAGAGAGAG  
AGATTTCTAGATATTAGTAATACTAAAATTAGATAAAGTAAGTTTTGTACATTTCTTTTTTATTTCTTAGATAATTTTTGT  
GCATTTGAAACTTTACTCTGGATCCAAATCATGCTGCTTATAGTTAAAAGCTTTATTATGAGCAATGCCTAATTTTAATT  
TTACTTA

>CaMLO13 LOC101510624

AAAGAATTGTCTTCAACTATCTCTCTGCCAAAACGTATTGCTAAAAAACATGGCCGAAGAAGTGAACCAGTCTCTTGAA  
TATACACCAACATGGATTGTTGCGGTTGTTTGTCTCCATCATTTGTTTTCTCTCTCTGTGCGCTGAGCGTGCCTTCACTA  
CCTTGGAAAGTTCTTGAAGAAGAGAAGTCAGACAGCATTATATGAAGCCTTAAACAAAATTTGGAAGAAGAGTTGATGCTTT  
TAGGTTTCAATTTCCCTTCTCTTAAACCGTCTTTCAAGGTCTAATAAGCGACATTTGCATCACACCTAAGCATGCAACTCAA

ATGCTTCCATGCAAGAGGTCTGATGAAGGTTTAGAGCATGAGATACACTATGATACTATAATCAACAAAAGAAGGCTTTT  
TTCTTCAGATTCCGGTTCGCAGCATTTGTAGGCAAGAGGGGAAGGTACCCTGTTATCACTGGAAGCATTGCATCATCTTC  
ACATTTTCATCTTTGTATTGGCTGTTGTACATGTAGTATTCTGTGTGGTAAACAATGATTCTTGGAGGTGTAAGGATCCGT  
GAGTGGAAAAGCTGGGAAGATCATGCTCAGAGTATGGCAATAAGTTCAAGTGGTAAAACCTTTAGAGTAGAGGAAGCTGG  
GTTCTTCGATAAAATGCTCAAGGGTATTGGAGAAAAGCAGCTGTTGTTGGTTGGCTGAGATCATTCTTCAAACAATTCT  
ATGGATCTGTTACAAAGTACGACTACCTTGCCTGCGCTGCGCATGGATTATCAAGGAACACTGCCGAAACAAGCCAGTTTT  
GATTTTCATAGTTTATATGATAAAGGACACTTGAAAATTGACTTCAAAGAGTTGTAGGCATAAGTTGGTACCTGTGGCTGTT  
TGTTGTGCTGTTTTTGTCTGTTGAATCTTGAAGGCTGGCACACTTATTTCTGGTTAGCCTTTTTACCATTGATAAATTCTAC  
TTCTTGTGGGGGCAAAGTTAGAGCATATAATCACTCGTTTTAGCCCAAGAGGCGGTAGCAAATGTAGACCGGACTGAACGA  
GTGAAACCATCCGATGAATACTTTTTGGTTTGGCCGCCCGCCATTGTCCTACACTTACTTCACTTCACTTTGTTTTCAAAA  
CGCGTTTGAGATCGCATTTTTCTTCTGGATTGGTGCACATATGGATTGATTGATGCATTATGGAGAAAATAGCCTACG  
TCATCCCAAGACTTATAATGGGTGTAATTGTTCAAGTGCTTTCAGTTACAGCACCTTGCCTTTTACTACTATTGTA  
CAGATGGGTAGCAGTTACAAGAAGTTGATGATATGGGGGAATCATCTTCTTGTCCATAGAATGACCAAAGAATCAAA  
TCAACATCCTCAAATGGTGAACAATCAATTATCATGATGGAAAATCATGCTATATCATCTACAATTGAGCTTTACATA  
CTGTCTAATCTCCTTTGGAGAGACCTAATACATTCAATACTTTATTCTTATT

>CcMLO1 C.cajan\_46346

ATGGTGAAGAAAAGCGAGTTTATGAACGAACACTAGAGGAAACACCAACATGGGCTGTTGCAGTCGTGTGTTTTGTGTT  
GCTTGTATTTCAATCCTCTTAGAACATATTTATCATGCGATCGGAAAGTGGTTCAAAGGAAAAACAAGAATGCTCTTT  
TTGAAGCGTTGGAAAAGGTTAAAGGAGAGCTTATGGTGTAGGATTCATATCCTTGATGCTAACTGTGTTGCAAGATCCA  
ATTTGCAAGATCTGTGTGTCCTCAAAGGTTGCATCTAGTTGGCATCCTTGTGCCAACCCAAAACCATTTGGTACA  
GGATAAATCTGGTGAAGATGAATCTGGTGTATGATGACGTTGAGATCAATTCTAGGAAACTCCTCCAATATTTATGAAA  
CCATACCAAGGCGTGTCTGGCTACAAAAGGATATGACAAAATGCTTTGCAAAGGCAAGTTCAACATCTTCACTGTTGTTT  
GAAAAGTGGCTTTTTGTTTTCAGCATATGGGATTACCAGCTCCATATGTTTTATCTTTGTGCTAGCTATTTTCCATATCTT  
ACAAATGCATTGTGACACTGACTTTGGGAAGAACCAAGATGAGAAAATGGAGGGCATGGGAAAATGAAACGAAAACCATG  
AATATCAATTTTTATAATGATCCTGAGAGGTTGAGTTTTGCAAGGGATACGACATTTGGAAGAAGGCACTTGA  
AGTCACTCAGCATTTTTCTTGGCTATAGTTAGTTTTCTTTCGACAATTCATTGGATCTGTCAATAAAGTTGACTATTTAAC  
ATTACGCCATGGATTTATCACTGCGCATCTGGCACCAGGAAGTATGCAAGATTTGATTTTTCAGAAGTATATCCAGAGAT  
CACTTGAGGAAGATTTTAAAGTTGTAGTGGGAATAAGCCCAATCATATGGTTCTTTGCGGTGCTATTTCTGTTGACTAAT  
ACTCATGGGTGGTACTCTTATTTATTTGGCTTCCATTTATGCCATTAATTATAATCTTATTAGTTGGTGTAAAGCTACAAAT  
GATCATAACAAAGATGGGACTGAGGATTCAGACAGAGGGGAAGTTGTGAAAGGTGCACCTGTGGTTGAGCCAGGAGATG  
ACCTGTTCTGGTTTAAACCGTCCACGCCCTCCTCCTCTTCTGATTATCTTGTGCTCTTTTCAAGATGCTTTTCAACTGGCA  
TTCTTTTCTTGGAGTACTTATGAATCTCCATAGACTCTTGTCTCCATGAAACAACCTGTAGATATTGTATAAGACTTGC  
AATGGGGATTATCATAAAGTTTTATGCAGCTATGTGACTTTGCCTCTGTATGCTCTAGTGACACAGATGGGTTCAACCA  
TGAAGCTACAATTTTCAATCAGAGAGTAGCATCAGCACTGAAGAAGTGGCACAACACTGCCAAAAGCAAATAAAAAAC  
AGTAAGCAAACCACACCATTTCTCAAGCAGGACATCAACTCCAACACATGGTATGTCTCCTATTATCTGCTACAGAGACA  
CCTTGTGTTAGAAAGTGCAGTGCACAAACATCTCCAAGGGCATCCAACATGAAAATGAACAATGGGATCTTGAAGGCT  
CACCTTCCCAAGCAACCATGCAGTAGCATCTAATGAGACCCAGATGCAAGTTTTTGAACCAGGCACAACCTTCAAGATTG  
CCTGTCAGCTCTCAACTTGAATCAGAGTTAGCTCCTCAGAATTTTCTTTGAGAAGAGACATCATGAGGGAGGTGATTA  
G

>CcMLO2 C.cajan\_07194

ATGCTTGTATTTCAATCTTCATTGAACATGCTATTGAATCACTTGGAAAGTTGTTAAAAAAGAAACACAAAAAGGCTCT  
TCATGAAGCGCTGGAAAAGGTTAAAGGAGAGCTTATGCTGCTTGGATTATATCCTTGCTCCTAGTGGTGTGTTGAAGATC  
GTATTTCTGATATCTGCATCTCAAAGAAGCTGCATCCTCATGGCATCCTTGTGGTCCCGATGATAAGCATAAAGATCCA  
AAAGGATATTATGACAAATGCGCTGAAAAGGCAAGCTTATCCCTCATTTTTTTTATAATTTACTTTTATTGATTGATA  
TTACCAACAATTTAAAGCCTACATGTTTTCTTCAATTTTATTTTTTATGATTTTTGCAAGGTAAAGTTGCTTTTGTGCTG  
AATATGGGATTCACCAGCTCCATATATTCATCTTTGTGCTTGTATTTTTTATATCCTACAGTGCATCATAA  
ACTCACTTTGGGTAGAACTAAGATGTCAATATGGAGGATGTGGGAAGACGAATCAAAGAGTCTTGAACATCAGTTCTACCATGATCC  
TGAGAGGTTGAGTTTTGCTAGGGATACAACATTTGGACGAAGGCACTTGAAGTCACTGATGAGTGCATCACC  
AATTTCTTATGGATAGTTAGCTTCTTCAAGCAATTTCTATGGGTGAGTTAATAAAGTTGATTATATGGCGTTACGGC  
ATGGATTATCGTG  
GCACATCTGACTCCAGCAAGTGAAGGCAAAATTTGATTTCCAGAACTATATCAAGAGAACACTTGAAGAGGATTTTGTAGT  
TGTGGTGGGCATAAGTCCAATCATGTGGTTCTTTGCGGTGCTAATCCTGCTCACAAATACTCATGGGTGGTATGCTTATT  
TCTGGCTTCCATTTATCCATTAATTATAATCTTGTGTTGGTGGGAACAAAGCTACAAATGATCATAACAGATATGGCACTA  
AGGATTCAGATAGGGGGGAAGTGGTAAAGGTGCACCTCTGGTTGAGCCAGGAGATGAATTGTTCTGGTTCAATCGTCC  
CCGCTCGTCTCTCTTTGATTCAACTTGTCTCTTTTCACTGCTATGCTGCAGAATGCATTTCAACTAGCGTTTTTTGCTT  
GGAGCATAATGACAAATGGGTTAAAAATAAACTTTGCTTCCACAGAATCTGCAGATATTGTCAATTAGACTTACAATG  
GGGTTCTCACACAAGTTCTATGCAGCTACGTCACTTTACCTCTTTATGCTCTAGTACACAGATGGGTTCAACCATGAA  
ACCAACAATTTTCAATGACAACGTAGCAGCAGCACCTAAAGAAGTGGCATCACACCGCTAGAAAGCATATAAAACACAAGG  
ATTCGAGTCAATCTGCAGCCAACACACCATTTCTCAAGCAGGCCAGGAACCTCCAACACATGGCATGTCTCCAGTTCACTG  
CTTCACAAACACCTTAGACACAGTATAGTCTCTAATTTCTCCAAGGGCACCTCATTACCATAATGAACAATGGGATGT  
TGAAGGGTCACTTCCCAAGTCATCATGCAAGAAATCATGAAGACACCATGCAGCCTCCAACAGCAGAATTGACTCCTA  
TTGGACTCCAACCTATTAGGACTCAACATGAAATCAACATTGCTTTGTCTGAATTTTCAATTTGGGAGGGGACACCACACT  
AATAATAGTAACTAG

> CcMLO3 C.cajan\_32587

ATGGCCGAAGACAAAATTTATGAACGATCGCTTGAGGAAACACCAACCTGGGCGGTTGCAGTTGTATGTTTTGTGCTGCT  
TGCTATTTCAATCATCATAGAACATATTTATTCATGCGATTGGAAAGTGGTTCAAAAAGAAACACAAAAGTGCTCTTTATG  
AATCGTTGGAAAAGGTCAAAGGAGAGCTTATGATGCTAGGATTCATATCCATGCTCCTAACTGTGTTTCAAGGTTCCACTT  
TCTAAGATCTGCATATCGCAAAAATGTTGCATCCACGTGGCATTCCGTGTCAACAACCAAAAATCTGCACACTGGCACCAATGG  
TAGGAAACTCCTCCAATATTTGGAACCTCATATCTCGGCGTGTCTTAGCTGCGAAAGCAAATGACAAATGTGCTGAAAAGG  
CAATTTTGATGCATTATGTTGCATTTAATTTGCAGGGAAGAGTTGCTTTTTGTTTCGGCATATGGGATTACCAGCTCCAT  
ATATTCATATTTGTTCTAGCTGTTTTTTCATATCCTACAATGCATTATAACACTAGCTTTGGGAAGAACTAAGATGAGACG  
CTGGAAGAAGTGGGAAGATGAAACAAAGACAATTTGAATATCAATTTCTATAATGATCCTGAAAGGTTCCAGGTTCCGAAAAG  
ACACAACATTTGGACAAAGGCACCTTAAATACGTGGAGTCACTCATCAATTTTATTATGGATAGTTAGCTTCTTCCAGGCAA  
TTCTTTGGATCTGTTAAGAAAGTTGACTATTTTCGCATTACGTGATGATTTTATTACCGCACATCTGGCACCAGGAAGTGA  
TGCAAGATTTGATTTCCAGAAGTATATCAAAGATCACTCGATGAGGATTTTAAAGTTGTCTGGGAATAAGTTTAACTT  
TTTGGTTCTATGGGTGGTATTCTTATTACTGGCTTCCATCTATCCCATTAATTATAATCTTATTAGTGGGTGCTAAGCTA  
CAAAGATCATAACAAAATGGGACTGAGGATTCAAGACAGAGGGGAAGTAGTTAAGGGTGCACCTGTGGTTGAGCCAGG  
AGATGACCTGTTCTGGTTCAACCGTCCACGCTCCTTCTTCTCATCATTACCTTGTCTCTTTCAGAATGCCTTTCAAT  
TAGCACATTTTGCATGGAGTACATATGAATTTCCATAAACTCTTGCTTCCACAGATCAACAGCAGATATTGTGATCAGA  
CTTACAATGGGGGTTGTACATAAAGTTCTATGCAGCTATGTGACCTTGCCCTTTTATGCTCTAGTCACACAGATGGGTTT  
AACCTTGAAACCCACCATTTTCAATGAAAGAGTAGCAGCAGCATTGAAGAAGTGGCACCATGCTGCCAAAAACCATGTGA  
AAGACAGCAAGCACTGCGAGGCTAATAGTACCACAGCATTCTGCAGCAGGTCAACCCCAACATTTGGCATGTCCCCT  
GTTCACTGCTAAACAGACACCTTGTCTGGCAAAAGTGATAGTCCACAACTTCTCCAAGAATCCAACACTACGAAAATGA  
ACAATTTGATTTTGAAGTGAACCTTCCACAAGCACCCATTGAGGAACAGAGGAGACCCCAATGCAAGTTTTTGGGCCAC  
CTTCGACAACAGAATTCCTATTAGCACTAAGCTTGAAGTCCACGTTAGTTTATCAGATTTTTCTTTTGAGAAGTAA

>CcMLO4 C.cajan\_12516

ATGGGGGAAGAAAATGAAGAAGGAAGATCCTTAGCTGAAACCCCCACATATGCTGTGGCAACTGTCATCACTGTCTTGGT  
TTCTCTCAGTTTCTTGTTCAGGCACGTTAAAAAATTAGTAAAGTGGTTAGACAAAACCAAGAGAAAATCTCTGCTTT  
CTGCTCTGGAAAAGATCAAAGAAGAATTAATGCTTTTTGGACTTCTGTCAATTGCTGATGGGTCAATTGGATTATTTTTGTG  
GCAAAGATTTGTGTTAAGTCACTCGGTATTGAGCAGCAGATTTTTTCCATGTGCAATGGACAAGAATTTGCGAAACGTAT  
TGTTTTGGCCAAGTTCAGAATCTATAAATAAAACAGATTTCAAAGGACTAGAGATCTCTGGCCGGCATAATTATTGTCTG  
AGGGTCAATGAATCATTTGGCTTCTTATGAAAGTCTTGAACAGCTTCACTCGCTTTGTGTTTGTCTTGGGGTCACCCATATT  
ACCTATAGCTTTTATGCTGTTGCCCTGGCCATGATCAAGATATATAGCTGGAGAACATGGGAAAATGAAGCAAAGACTAC  
TGCTATACAAAGCATAAAGATACTCCACAAAGTACATCAAGCATAAGATTGAGGCGGCTTAGTACATTCATCTTCCACC  
GTACATCCCATCCTTGGAGTAATCACAAAATTTAGTTTGGCTGCTATGTTTCAGCCGCCAATTTTGGAGTTCCATTAC  
CGAGCTGATTACATGGCATTTGCGCTTAGGCTTCAATACCAATCATGAGCTTCCCCTAACATACGATTTCCACAACATATAT  
GCTTCGAAGCATGGACGAGGAATTTCTGTGACATAGTTGGTGTAGTGTGCTTCTCTGGGTATATGCCATCTGCTGTATTT  
TTCTAAATTTTACGGAAGCAACTTTTACTTTTGGCTTTCCTTCGTTCCAGCAATTTTGTATCCTCATAATTGGTACTAAA  
TTGCATCGAGTGGTGGTAAAGTTGGCTGTTGAAATTTGTAGATCGTTGCCAGTTATCAAACCTCACCGGTTTAACTTAAAG  
AGATGAGCTATTTTGGTTTGGAAAGCCTAGGTTTCTGTTACGGTTAATAACAATTTGATATCCTTCTTGGTTATCTTTTACA  
ATGCATTTGAAATGGCAACATTTTATGGTCCCTGTGGGAAATTAAGATCCTTCTTGGCTTCAATGAGCAACCACACTTT  
ATCGTGTACCGCTTGTCTTTCGGGTCATCTCCCAAGTCTGGTGCAGCTTTATAACGTTTCTCTCTATGTCTATCATCAC  
ACAGATGGGGTCAAGGTTCAAGAAGACTGTGGTCACTGAAAATGTAAGAAAATCACTCTCTAAATGGCAGAGAAGAGTGA  
AGGACAGACAAAGTTCTCTTATGCAGTCTTACCAGCAATATCAGCATCGTCATATGGAACACTGTGTCTAATTTCCCGTGCC  
TCAAATAGTGAGGAAGGAAGCTGCTCAGGGATTAAGATATTTGTCTTGATAATGTGTCAAACACCCAAAGAAAATGCACC  
ATTTCAAAGTTATGGAGATCATCATGATCATAATCATAATGTAACGATGATTCATCTTCCCCTCCTCCATCTTGA

>CcMLO5 C.cajan\_34110

ATGGAAGGAAGAAGCTTAGCGGAAACACCTACTTGGGCTGTGGCTGTTGTTTTGTTTTGTTTTGCTCTCCATATCTATCTT  
CATTGAGCACATCCTCCATCTCATAGGAAAGTGGTTGAAGCAAAGCAGAAAAGTATCTATACGAGTCACTTGAAAAGA  
TCAAATCAGAGCTTATGTTATTGGGGTTCATATCGTTGCTACTAACAGTAGGACAAGGTGTAATATCGAGGATTTGTATA  
ACGAAAAGGTTGCCGACACATTTACCCCTGCCCAAAGGATCATCATCAAACACTAGTGCCCGGAGATTACTTTCCGA  
TAACCAAATCACCGTCTGATTTTGGCGGCCGGAGGAAGTGACAAGTGTCTCCGGGTAAAGTCCCCTTTGTGTCTATCGG  
AGGGCATTCATCAACTCCATATATTTATCTTTGTGCTCGCTGTTTTTACGCTCCTTTACTGCATACTTACTCTGGCTTTG  
GGTAGGGCAAAGATGAGAAGGTGGAACGATGGGAAGAGGAAACCAAGACAGCAGAGTACCAATTTTACACGATCCTGA  
ACGTTTCAAGTTTGGCAGGGAGACCTCGTTTGGGAGAAGGCACCTGAAATTTCTGGACCCAAAATCTTGTCTTGTTTGGA  
TTGTTTTGTTCTTACAGGCAGTTTCGTACGTTTCAAGTAAAGTATATTTGACCTTGGAGGATGGATTTATGATGGCT  
CATTTGGGGCTCAAAGTCAATGAAATTCGACTTTTCGACAATATCAAAGATCTTTGGAAGAGGACTTTCAAAGTTGT  
CGTCGAAATCAGTCTCCAATATGGTTTCACTACCGGATTTTTTCTCTGTTTAACTACTATGGCTGGTATTCTTATCTAT  
GGCTGCCATTTGTTCTTTGATTATCATTCTATTAGTTGGAACCAAGTTGCAAGTATCATAACAAAGATGGGTCAAAGA  
ATTGAACAAAGAGGAGAGGTAGTAAAGGGCGTGCCACTAGTGCAACCTGGAGATGACCTATTCTGGTTTAAAAACCTCG  
ACTTATTCTCTACCTCATTAATTTTGTGCTTTTTCAAATGCTTTTTCAAATGGCCTTCTTTTTCATGGACTGCGCTTCAAGT  
TTAGGATGACATCTTGTTTTCAATCCGAAACAAAGGATATGGCAATCAGAATCTCAATGGGGGCTTCTGTTCAATTCCTT  
TGCAGCTATGTGACCTTCTTCTTCTATGCTCTCGTCACACAGATGGGTTCAACGATGAAGCCAACCATATTCAGCGGAAG  
AGTAGCGAAGGCTTTAAGGAAGTGGCACCACACAGCGAAGGAGCACGTAAGCAGAACCCTGGATTGCAATCACATAACT



CTTTGCCATGCAAGCCCACAACCCCAAGCCCCCTACGTCCCCGGCCCAACTCCTTCGCCACTGCCACAGTCAAATGGAC  
ACCTATCCCCTCATCTCCGACAAGATCCGATTCGGAGGCCAATACCACTACGAGATCGATTCAACCTCATTCTCCGACGA  
GCATCATCAGAAATCCAAGGCTGTTGCTGATTCTAATTCATTCAGCTCCATGAAATGGAAATGGGCCACCTGGCCCATG  
ATCAACCACAGAGGGACAATGAGCCCAGCTCTACCCTTGAGGGTTTAGGTCTGAGTCACCACGAGATTCATATTGAACAT  
ACCAAATAA

>CcMLO6 C.cajan\_34112

ATGGCAGGAAGAAGCCTAGAGGAAACGCCACTTGGGCTGTGGCCGTTGTTTGCTTCGTTTTGCTCTCCATATCTATCTT  
CATCGACCACATCTTCCATCTCATTGCAAAGTGGTTGCAAAAAGAAGCACAAAAAAGCTCTATTTGAGTCACTCGAAAAA  
TCAAATCAGAGCTTATGTTATTGGGGTTCATATCGTTGCTACTAACAGTAGGACAAGGTGTAATATCGAGGATTTGTATA  
ACAGAAAAGGTTGCCGACACATTTACCCCTGCCCAAAGGATCATCATCAAACCAGTAGTCGCCGGAGATTACTTTCCGA  
TAACCAAATCACCGTCGTATTTTGGCGGCCGGAGGAACCGACAAGTGTCCCCACGGTAAAGTCCCCTTTGTCTCATCGG  
AGGGTATTCACCAACTACATATATTTATCTTCGTGCTCGCTGTTTTTTCATGTCTTTACTGCATACTCACTCTGGCTTTA  
GGTAAAGCAAAGATGAGAAGGTGGAACGATGGGAAGAGGAAACCAAGACAGCAGAGTACCAATTTTACACGATCCTGA  
ACGGTTCAGATTTGCAAGAGAGACATCGTTTGGGAGAAGACACTTGAATTTTGGACCCAAAATCCTGTCTTTGTTGGA  
TTGTTTGTCTTTCAGACAGTTTGTACGATCAGTTCCTAAAGTAGATTATTTGACCTTAAGGCACGGATTTATGATGGCA  
CATTTGGGGTCTCAAAGTACCAGAAATTCGACTTTTCGGCAATATATCAAAGATCTTTGGAAGAGGATTTTAAAGTGGT  
TGTGAAATCAGTCCCTCCAATATGGTTCATCGCAGTGTCTTTTCTCCTGCTTAATACTCATGGTTGGTACTCTTATATAT  
GGCTACCATTTGCTCTTTGATTATCATCTTTTAGTTGGAACCAAATTAAGTGTATCAACAAAGATGGGTCAAAGA  
ATTGAACAAAGAGGAGAGGTCTATAAGGGCATGCCACTAGTGAACAGGGGATGATCTATTTTGGTTTAAAAACCTCG  
ACTTATCTCTACCTCATTAATTTTGTGCTCTTTTCAAGATGCTTTTTCAGCTTGCTTACTTTTTCATGGACCGCGCTTCAAT  
TTGGCGTGAAATCTTGTTCCTCCATCCATACAGAGGATTTGCTGTATCAGAATCTCAATGGGGCTCTTTGTTCAATTCCTT  
TGCAGTACGTGACTCTTCTCTCTATGCTCTCGTGACACAGATGGGATCGAGATGAAGGCAACCATATTCAGTGAAG  
AGTGGCGGAGGCTATAAGGAAGTGGCACCCACCGGCGAAGAAGCAGATAAAAAATAACCATGGGCTGGCCTCACAGTCAC  
AGACCCCTTTCTCAAGCAGGCCACAAGCCCGGCCATCCCTTCGCCACTACCGCAGTGAATAGACACCTTCTCTCA  
TCTCCAATAAGATCCGAGTCTTTGGCCCATCAGCCCAACGACATTGATTCACTCTCATACTTTAACTCACATCATCACAG  
GTCCAAGGTTAATGCTGCTTCTATCTCAATGAAATGGGTACCTGGCCCATGATCCACCACAAAATGTGAAAGAACCCA  
GCTCTGCCCTTGAGGGCTCAGACCCGACTCAACACGAGAGGGAATTTTCATTTGATAAAAAGATTACAAATTTAA

>CcMLO7 C.cajan\_21483

ATGGCAGGAGGAAGTGGAGGAAGGAACCTGGAGGAAACGCCTACATGGGCAGTCTCAGCTGTTTGCTTTGTTTTGATCAC  
AATATCTATAATCATCGAGCATATCATCCATCTCATAGGAAAGTGGTTGAAGAAGAAGCACAAAAGAGCTATGTACGAGT  
CACTTGAAGATAAAAATCAGAGCTTATGTTATTGGGGTCTTATCGTTGCTTCAACGGTGGGACAAGGTCCAATATCA  
AGGATATGTATATCGGAAAAAGTTGCAGGGACATGGCACCTTGCAGCAAGGACGACGAAAGCCATGACTCAGATAGTGA  
AGATTGCAACACGGAACCAATGGTCTGATGGTTGTTAGCGGCGTTCATGCTTCGGACACGCGGCGTCTTTTGGCCGGAG  
GAGGAAGCCACAAGTGTGCCAGGGTAAAGTCCCCTTGTGTCTATCGGATGGCATTCACTCCATATATTTATCTTC  
GTGCTGGCTGTTTTCCATGTTCTTTACTGCGTCTACTATGGCTCTGGGTAGAGCAAAGATGAAAAGGTGGAACGATG  
GGAAGAGGAAACCAAGACACCTCAGTACCAATTTTACACGATCCTGAGAGATTGAGATTTGCGAGGGACACATCGTTT  
GAAGAAGACACTTGAGCTTCTGGACCAAAAATCCTGTCTCATGTGGCTGTTTTGTTTTCTTTAGGCAGTTTGTGCGGTCA  
GTTCTTAAAGTGGATTACTTAACCTTGAGACATGAGATTTATAATGGCACATTTGGCTCCTCAAAGTCACTCAAATTTGA  
TTTTAGGAAAATACATAAAACGATCCTGGACGAGGATTTCAAAGTTGTGTTGGAATCAGTCTCCTCATTCTGGTCTTCG  
CAGTGTGTTTTCTCCTCTTAAACACTCATGGGTGGTACTCTTATCTGTGGCTGCCATTTATCCCTTTGATTATCATCTTG  
TTGGTTGGAACCAAGTTGCAAGTATCATAACCGAGATGGGCCAAGAATTAACAAAGGGGAGAGGTACTGAAGGGCGT  
GCCTTTGGTGAACAGGGGATCATTGTTCTGGTTTAAACAGACCAGGCCCTTATTTCTTACCTCATCAATTTTGTGCTAT  
TTCAGAAATGCTTTCCAGCTGGCTTTTTTCTCATGGTCTGCGCTTCAATTCGGGATTCGATCATGTTTCCATTTCGATACG  
GAGGATGTGGTATCAGAATCACAATGGGGTCTGATTCAAATCCTGTGCAGCTACGTCACTCTTCTCTACGCTCT  
AGTAACACAGATGGGTTTCGACAATGAAGGCAACAATTTTCAACGAAAGAGTGGCGGTTGCGCTGCGGAACTGGCACAAA  
CCGCGAAGAAGCACATAAGACAGAACCAGGCGTGGGACCGTGTGCTGTTGTCGGGGACACCAACGTCAAGCAGACCCACAACG  
CCGAGTACCACATGTCCCAGTGCACCTCCTACGATACTACCGTTCGGAAGCGGATAGCTTCCCTGCTTCTCCTCGAAG  
GTCTAAGTTGGATTCCCAACCTTGGGATAATAGTAACATCAACGTTGATTCCCCTTCTCCTTCTTACTCCCACCACCAAT  
TGGAAATGGCTCCACAAACCAATGACCCACCGTTGACACAACGCACCATGAGATTGTTGTTGCACGTATAGCAAGGAG  
TTTTCTTTGATAAAAAGACCTACTACTAATAATACGTAA

>CcMLO8 C.cajan\_16636

ATGGCAGAAGAAGTGGAGGAGTCTCTGGAATATACACCAACATGGATTGTGCGGTTGTTTGGCTCCATCATTGTTTTCAT  
CTCTCTTTGTGTTGAGCGTGTATTCACCGCTGGGAAAGTACCTAAAGAAAAAAGATCAGACTGCATTGTATGAAGCCT  
TACAAAAATGGAAGAAGAATGTATGCTTTTGGGTTTCAATTTCCCTCCTATTAACCGTATTTCAAGGTCTAATAAGTCAT  
ATTTGCATTTACCAAATCTTGCAACCCAAATGCTTCTTGAAGATACCTCATGGGTCTTCAAGACTTCAGAGCATGA  
TCAGATATACTACGATGCTATAATAAACAGACGAAGGCTTTTTTCAACAGACACCGGTTTCAAGCATTGTAGGCAGAAGG  
GGAAGATTCCATTGCTATCACTGGAATCATTACATCATCTTACATTTTTATCTTTGTATTAGCTGTTGTACACGCAGCA  
TTCTGTGTCATCACAATGGTCTTTGGAGGTGCAAGGATCCGGCAATGGAAGAAGTGGGAGAATTTTAAAGGAAGGAGTA  
CATAAGTTCAAATAAAGAGTACCATGAGTCTTCAATATACATACTGATGGACATTGGAGAAGAGCAGCTGTTGTTAGTT  
GGCTGAGATCATCTTCAAGCAATTTTTTGGCTCTGTTACGAAGAATGACTACCTTGCAGTACGGATTTGTCCAG  
CAACACCACCCAAACGTTCCGGAGTATGATTTTTATGATTACATGCAGCGGACACTTGAAGTTGATTTCAAAAAGTTGT

AGGCATAAGCTGGTACCTGTGGCTCTTTGTTGTGCTGTTTTGCTGTTGAATCTTGAAGGATGGCACACTTATTTCTGGT  
TAGCCTTTTTACCATTGATACTTCTACTTCTTGTGGGGGCAAAGTTGGAGCACATAATCGCTCGTTTGGCTCAGGAATCA  
ATTGATATGATGGGAAAAGAAAGGTACCAAACATAAAACAAGTGAAGCCATCAGATGAATACTTTTGGTTTGTCTCGCCCAGC  
TCTAGTCCCTTGACTTACTTCACTTTCATTTTTGTTTTCAAACCTCTTTTGTAGCTTGCATTTTTCTTCTGGATTTGGTGTACTT  
ATGGATTTGATTCATGCATTATGGAGAAAATATCTTACATAATCCCAAGACTATAATAGGTGTAATTTGTTCAAGTGCCTT  
TGCAGTTACAGCACCTTGCCCTTTGTACACTCTCGTACTCAGATGGGTAGCAAATAAAGGCTGATAAGGTGATGAATC  
TCCATTGATGGGGCCTGAAGGTGGCTCCTCCAATTCAAGGGCGGTCCAACCCGATGATCAAAGAATCAAACCAATGTGCTC  
AAATTGATGAACAAGCAATAATCATGGTGAAGATGCAACATCTATAATTGAGCTTCCCCACATTGTCCAATCTCCGTAT  
GAGAGACCTAATGCATCCAATATTCACTAA

>CcMLO9 C.cajan\_01454

ATGAGTAGTTCAAAGTTGAGAAACCTGTTCTGGGGTGTGTTGTTTTCATGGATATGGTTTTGGAGGTTTTGGCCATGGCGGC  
AAGTGACAGTAGCAGCAGCAGCTCCAGAGACCTGGACCAGACACCAACGTGGGCCGTTGCTGCTGTGTGCACTGTTTTCA  
TTTTGATATCCATAACATTGGAAAAGAGTCTCCACAACTTGGCACGTGGCTTGGACAAAAGCATAAGAAGGCTATGCTG  
GAAGCTCTGGATAAGGTCAAAGCTGAGTTGATGATTTTTAGGGTTCATTTCACTTCTTTTACTTTTGGGCGAGAGCTATAT  
TGTCAAAAATATGCATTTCTGAAAAGATCGCATCCAAAATGTTGCCATGTCCATATAACTATGAGAGTACCGATAGTGCCT  
CAGATACTGAAGAGAACCATCGTAGGAACTTCTGTCTATATGAACGTAGATATTTAGCTGCTGATACTACCTCGTACAAA  
TGCAGCAAAGGAGGGACATGAGCCACTTTTTATCTGTCAATGGATTGCACCAGTTACACATCCTCATATTCTTCTTAGCAGT  
TTTTCATGTGCTTTACAGTGTCTATCACAATGCTCCTTGGAAAGACTAAAGATACGTGGTTGGAAGGCATGGGAGGCAGAGA  
CTTCTACTCATGATTATGAGTTCGCTCATGATGCTTCAAGATTTAGGCTTACACATGAAACATCATTGTGAGGGCCCAT  
GCAAGTTATTTGGACAAGGATTTCCATCTTCTTCTATATTAGCTGCTTCTTTAGGCAGTTTTATAGGTCTGTCCGTAAGAC  
TGACTTCCAGACTTTGCGCCACGGGTTTTCAATGTCCACCTGGCTCCTGGAAGTAAATTTAATTTCCAAAAGTATATCA  
AAAGATCATTAGAAGATGATTTCAAGGTGGTTGTGGGAGTCAGTCTGTCTTGGGCATCAGTTGATGTTTTTCTACTC  
ATCAATGTTAATGATGGCGTACTCCAATTTGGGCGAGCTTAATCCCTATTATTATAATTTTGGCCGTTGGAACAAAAC  
TCAAAGCCATATTGGCCAGGATGGCTCTTGTATATCACCGAAAGACATGCAGTTGTCCAAGGAATGCCTCTTGTCCAAGGCT  
CAGACAAAATACTTTTTGGTTTTGGTCCAGCCACAGTTGGTCTTTCATCTTATCCATTTTTGCTTTGTTCCAGAATGCGTTCCAA  
GTAACATATATCTTGTGGATATGGTATTGTTTTGGGGTGAAGAACTGTTTTCCGTAAGTACTGACTACAAGCTTGCCATGATAAA  
AGTAGCTATAGGGGTTGTGATGCTATGCCTCTGCAGCTATATCACCTTCCATTATATGCTCTTGTAACTCAGATGGGTT  
CAAGGATGAAGAAAGCAATATTTGATGAGCAAACAAGCAAGGCTCTAAAGAAATGGCACATGGCTGTGAAAAAGAAGCAT  
GGAGCAGTGAAGCTGGGAAAGTCGAGTGCACGTACCTTAGATAATGGAAGCCCCATTGGTTCAACAATGAGCTCCCCTGG  
GCCACACTGCACCGTTTTCAAACAACCCGGCCACTCAACCCGCTCTTCAACGTACGAGGATCAAGACGATTATGAGTCCG  
ATGATGTTGAGGTGTCTCCCGTGTGCGAAACAACCTAGCTTCAATTGTAAGAGTGGATCCTGGTGGCAACATGCAGAAGAA  
GAAGAAGAAGATCATAAACACCATAGTGCATAGTGAAGGAGAAATCAACGATGAAGCTGAATTCACCTTCGTCAAACCTCAA  
ACCTCATCTGGGCAAAGAACCACCACGTAG

>CcMLO10 C.cajan\_18941

ATGTCGGGAGGAGGAGGCGGTGACGCCAGGCAGCTAGATCTCACGCCAACATGGGCTGTGCTGCGGTTTTGCGCAATCAT  
CGTTATCATTTCTATACTCTTGGAAAAAATCATAACAAATTCGCTAAGATGTTTTGAAGAGAAAAAATCATGCATTGC  
TAGAAGCTCTTGAGAAGATTAAGGCCGAGCTAATGATCTTGGGATTTATTTCCCTGCTCTTGACATTTGGGCAAAAAC  
ATTTCTAAAGTGTGTATACCGGAGAGGTTTTTCATACACGATGCTTCCCTGTCTTCCCGTTGAGAAGCGTGGAGTGTCA  
TGGCGAACATGGAGCTGCACCGCATGAAGAGGAGGGGGTGGAGCTGAAGCTGAAGAGCATCACCGCAGGCTTTTATCAT  
ATGAACGTAGTTTTCTAAGTGTGAAGCTGGAGGCCACAGTTGTGAGTTGGGGCACGTGCCTCTTATATCAGTGAACGGG  
TTGCATCAGTTGCACATTTTTTATATTTTTCTTGGCTGTTTTCCATGTGATATACAGTGCCATAACAATGACGCTTGAAG  
AGCAAAGATTCGTGGATGGAAGGCATGGGAACAGGACCATATCGTGGATCAAGATGCCTTGAATGATCCTAGAAGATTCA  
GGCTTACTCACGAGACATCATTTGTGAGGGATCACAACAGTTTTTGGACTAAAACACCAGTTACCTTCTATTTTTGTATGC  
TTCTTTTCGACAATTTTTTTCAGATCTGTTCTGTTAGGGCCGACTATTTGACCATGAGACATGGTTTTTGTGACTGTCCATTTAGC  
ACCCGGAAGTAAGTTTTGATTTTTCAGAAATATATCAAGAGGTCAATTAGAAGATGACTTTAAGGTAGTTGTAGGAATCAGTC  
CAATCTTTTGGGCATCAGTGGTGTATTCTTGTCTTGTGAATGTCCATGGATGGCATGCTTCAATCTGGGTGTCTTTTCTT  
CCACTATTGGTGAATTTGCTGCTGTTGGAACAAAGCTTCAAGCAATTATCACTCGAATGGCACTTGACATAAAAAGAAAGGCA  
TGCTGTAGTGCAGGGGATCCCTCTTGTGCAAGTCTCTGACAAGTATTTTTGGTTTTGCATGGCCTCAGTTAGTTCTTTATC  
TCATCCATTATGCTCTTTTCAGAATGCATTTGAGCTGACGTACTTCTGGTGGACATGGTATGAATTTGGTTGGGCTTCT  
TGCTTTTACGAGGATGATAGTCTCATGATTGTGAGAGTAGCTTGGGATAGGAGCTCAAGTTGTTTTGAGCTATGTAC  
ACTTCCACTCTATGCATTTGTAACACAGATGGGATCAACGATGAAGAAGTCAATATTTGATGATCAAACATCGAGGGCTC  
TGAAACAGTGGCATAAGAATGCTCTGAAGAAGAAAGCATCCAAGGGACGAGCGGAAACTCGAACGTTAGGTGCGAGTCCA  
GGAGAGTCGCCGGATGTTTTGCCACGGCCAACGACGGCCGAAGAAACAGAAATGGCTGAGCATGGCGCCACCATTGTGAG  
CACCGTCGATAACGAACAACAACAGTACAATAACCGCGACCTTCTAACTGGACCATGA

>CcMLO11 C.cajan\_18939

ATGGCTGTTGCAGCTTCTGGAAAAGAAGCTTGCAGGCAACACCCACATGGGCAGTAGCTGTTGTTTTGTTGAGTTTTTGT  
CATTATCTCTGTATAAATTGAACATGGAATCCATTCACTTGGAAAAGTGGTTTTCAAACACGACATAAGAAGGCCATGAATG  
AAGCGTTGGAGAAAATCAAAGCGGAATTAATGTTGCTAGGATTCATATCCCTATTACTTACGTTTTGGTACAAAGTATGTT  
GCAAAGATATGCATTTCTGAATCATTTGGTGCACCATGCTGCCATGCAAGAAGGTGAAACCAGATGATGACTCAAATGG  
CAGAAGGAGACTACTTTCTTTGGACGAGAGCGTGAATGGCGTGCAGTTTTAGAAGCTGCGTCTGGTGGTGGTACTCTT  
GCTCACAACAGGGTAAAGTGCCTTTGATATCTCAGTCAGGGGTGCATCAGTTACATATATTTATATTCGTGCTGGCTGTT

TTTCACATTTTTTACAGCGTCATGACTATGGTGCTAGCCCCGAGCAAAAATGAAGAAATGGAAGGCTTGGGAAGCGGAAAC  
AACCTCCCTGGAGTATCAATTTACAAATGATCCTGCAAGGTTGAGGTTTGCATCAAACATCATTTCGTTAGGCGTCACT  
CTGGTTGGTCTAGGATGCCAGGAATTCGATGGATAGTGGCATTCTTTAGGCAATTTTTCGCTCTGTGACTAAAGTGGAT  
TACATGACTATGCCGCACGGATTTATTAACGCACATTTTGTCTCCCAATACCAAATTTGACTTCCAAAAATACATTAAG  
ATCCATGGAAGACGACTTCAAAGTGGTGTAGGCATAAGTATCCGCTATGGGCTTTTGAATCATCTTTCTGCTTGTCA  
ACGTTTACAAATGGTACACGCTCAGTTGGCTATCATTAGCGCCGCTAGTGATACTTTTATTGGTGGGCATGAAGCTGGAA  
CTTATAATCATGGAAATGGCCCAAGAAATCCAAGATCGAACCCACAATTTGTTAGAGGAGTACCTGTTGTAGAGCCAAACAA  
TAAGTACTTTTTGGTTTAAACAAGCCTCAGTGGATTATCTTCTTAATCCATTTTACCTTATTTCGAGAACGCCTTCCAAATAG  
CCTTTTTCTTGTGGACATGGTATGAGTTTAAAGATCACATCTTGTCTCCATGAAAACCTTGCCATTAATACTAACAAGGTT  
GTCCTTGGGATAGCCTTGCAAATTTGTATGCAGTTACATAACATTTTCTCTATTCCCTAGTAACACAGATGGGGTCTCA  
CATGAAGAAAGCAATATTTGAGGAGCAAACAGCAAAGGCCTTAAGAAATGGCAAAGACAGCAAAGGATAAGAGGAAGT  
TAAGGAAAGCAGGGATAGAAATAGCTTCAGGAGAAACAACACCAAGCCACGGGACATCACCCTGCATTTGCTTACAAG  
TCAAAGCCAAGCCACAGCCACATAGAAATGGACAGTGTCTCTATTCTCCACGATCGTACCAATCTGATACTGACTTGTC  
TGAGACAGAGGGATCCTCACACCAACAAAATGAAATAACACAAACACATCAACCTCCAAGGAATAATGGACTAACTCATG  
ATATCGATTTTTTCATTTGAGAAGCTTTAA

>CcML012 C.cajan\_36621

ATGTCGTCTCAAAGTACAAAAGCTGTGCCTTTGTCTTGTTCATTGTTCTGCTTTGGTTGTGTGGCTATGGCTTCTAG  
TGAGAGTAGTAGTGGTTCCAAAGAGCTTGATCAGACACCAACATGGGCTGTGGCTTGTGTCTGCACTGTTTTTCATCTTGA  
TTTCCTTAACTCTGGAGAAAAGCCTTCACAACTGGGAACGTGGCTACGGGAAAAGCACAAGAAGGCTTTGCTTGGAGGCT  
TTGGAAAAGGTCAAAGCTGAGTTGATGATCTTGGTTTCTTTTATTGCTTCTGACTTTCCGGCAGAGTTACATTGTTAG  
AATATGTATTCCTCTCAATGTGGCAGACAAATTTGTGCCTTGTAAAGTATGTTGGTACCACAATGAATCAAGTAGTGAAG  
AGGAACACCGTAGGAAGCTTCTTTTATGAACGCAGATATTTGTGATGAAGCTACCCCTTATCAATGCGGCAAGGGA  
CATCAGCCACTTATATCTGTGAATGGATTGCACCAGTTACACATCCTCATATTCTTCTTAGCTGTCTTTCATGTGCTTTA  
CAGTGTCTCACAAATGCTTCTCGGAAGACTAAAGATTTCGAGGATGGAAGGCATGGGAGGCAGAAACTTCATCTCATGGTT  
ACGAGTTTGCCTAATGATCCTTCAAGATTCCGGCTTACACATGAAACATCGTTTGTGAGAGGTCATGCTTCATTTTGGACA  
AGATATTCAATCTTCTTCTATATAGGATGCTTCTTTAGACAATTTTATAGGTCTGTGGGCAAGGCTGACTACTTGGCTTT  
GCGCAATGGATTTCATCGCTGTCCACCTGTCTCCTGGAAGTAAATTTAACTTCCAAAAGTATATCAAAGATCCTTGGAGG  
ATGACTTCAAGGTAGTTGTTGGAGTCACTCCTGTCTCCTGAGCAGCATTGTTTTTTTTCTGCTTCTAAATGTTTATGGA  
TGGCATGCTGGGGTATGGGCATCCTTAATTCCTTTTTTTATAATTTTTGCTGTTGGAACCAAACCTTCAAGCCGATTTGGC  
AATGATGGCTATTGAAATCACAGAAAGACATGCTGTTGTACAAGGGATTCTCTTGTTCAGGCTCAGACAGATATTTTT  
GGTTTGGTCAGCCTCAGTTAGTTCTTTCATCTTATCCATTTTGTCTTGTTCAGAAATGCATTCCAGATAACATATTTCTTG  
TGGATATGGTATTCTTTTGGGCTGAAAACCTGTTTCCATGCTGACACTGAGGTTGCAATAGTGAAGTAGCTTTAGGGGT  
TGGAGTTCTTTGCCTCTGCAGCTACATCACCCTTCCATTATATGCTCTTGTACTCAGATGGGATCAAGAATGAAAAAAT  
CAATATTTGATGAACAAACATCAAAGGCGTTAAAGAAATGGCACATGGCTGTGAAAAGAAGCAAGGAGTGAACACTAGGG  
CAATCCAGAGTGCAGCCATGGATGGAAGCACCACAGATTCAACAGTACACTCTTCTGGCCCCACACTACACCGTTTCAA  
AACCCTGGTCACTCAACTTCTCACACCATGTCAACCTACGGTGACCAAGATGATTACCATTCTGATAATGAATTGACTT  
CCATTTCAACCAACATCAAGCTTGATAGTAAGAGTGGACCATGATGAGCAAGAACCAGCAAAAAGAAATTTGAACACCACCC  
ACAGCCAACAATCAATAG

>CcML013 C.cajan\_17246

ATGGCAGAGGTGCTGCAGCGAGGTCGCTCTCTGGCTGAGACACCAACGATTCAGTTGCCTCTGTTGTTACTGTCTATGGT  
CTTTGTCTGCTTCTTGGTTGAGCGTTCAATCTACCGCTTTGGAGAGTGGTTGAGGAAAACAAGAAGGAAGGCACTTTTTG  
CTTCACTGGAGAAAATTAAGGAAGAGTTGATGCTGCTTGGGCTTATCTCTTTGTTGTTGGCACAAAGTGAAGGTGGATC  
TCCGAAATTTGTGTGGATTTCATCCTTTTTAGCAGTCGATTTTATATTTGTTCTGCACAAGACCTGGGCACGACTGAGAA  
TATCATGCACGAAAGCTTGTCTCTTTCCCTGATGAAACTACTATTCCAAAGGCTTAAATAGTGGAGCATTCAACCAAT  
GTGGAGCGGGCCATGAACCATTTGTTTCATATGAGGGCCTTGAGCAGCTGCACAGGTTCTTATTTGTTCTTGGGATCACT  
CATGTTATGTATAGTTGTCTGGCAGTTGGTTTAGCAATGAGCAAGATCTATAGTTGGCGCAGATGGGAAAATCAGGCTAA  
GATGGCAATCGATGGAACCTTGAAGGAAAGAAAATAAAGGTTATGAGGCGGCAGACAACATTTGTTTTCCATCACACAT  
CTCATCCATGGAGCAGGAGTCCAATCCTAAACTGGATGCTCTGTTTTCTACGTCACTTTAGGAGCTCTATACAAAATCA  
GATTACCTTGCCTCCGTTTAGGTTTTCATCACTGAACACAAATTTGCCGTTGTCTTATAATTTTATAAATATGTGGTTG  
AAGCATGGAAGATGAATTTTATGCCATTTTAGGAATAAGCTGGCCACTTTGGCTTTATGCCATAGTCTGCATCTTTCGTGA  
ACATCCATGGTCTGAATATATACTTCTGGCTATCATTTATCCCTGCAATTTCTGTCTGTTGATAGGGACAAAACCTTCAA  
CATGTTGTATCCACTTTAGCACTTGAATTTATGAAGCAGACAGGTCATCTGCTAGGACACAAGTGAAGCCGCGGATGA  
TCTTTTTTGGTTTCAAAGCCAGATATACTGTTATGGCTGATACAATTTGTCTATTTTTCAGAAATGCCTTTGAAATGGCAA  
CATTTATTTGGACATTTGTTGGGATTTCAAAGAACAATCGTCTTCCAGCAAAACCATTACATGATCATCACTCGGTTGGCT  
TCTGGTGTCTTGTTCATTTCTGGTGTAGCTATATGACAGTCCCTGAAATATTATAGTTTCTCAGATGGGATCTCAGATG  
TAAGAAGGCCTTAGTAGCTGAGAGTGTTCGAGAGTCTGTCATAGTTGGTGTAAAAGAGTAAAACAAGTCAAGTCAAGCATG  
ACTCGGTGCATTACACACCCGCAAGATCAGTGTGTTCCCTCGAATCAACAATTTGATGAGAGGGATGAAATAACAGTTGTA  
TCCGGTACTCTAACTCGAAGTTTCATCCTTAGAGTCTTTGAATCAGATAACAGTGACTTTCAGTAGACCAGCTGAACTTTGA  
GACTCCCAACAATCCAAAAGATTCAATTAAGGTGACCGAGTATTTGTCTGAGTCTGTGTATACTAATACTAATAATCCCC  
CACAAACCGTCATACAACGGGGAAGACCATGTTGGCAATGGAGAGGAAGCAAAAAGTTGACACTCTTCTTGATTTGTTTCAG  
AAGACATGA

>CcML014 C.cajan\_23778

ATGAGTGGTGGAGGAGGAGAAGAGGGAGATACTCTGGAGTTCCTCCGACATGGGTAGTGGCCGCCGTTTGCACAGTGAT  
TGTGGCCGTTTCCCTGGCCGCCGAGCGCTTCCCTCCATTACGGAGGAAAGTTTCTGAAAGCCAAGGGCCAGAAGCCGCTCT  
TCGAAGCTCTCCAGAAGATCAAAGAAGAGCTGATGCTGTTGGGTTTCATTTCCCTACTTCTGACGGTTACACAAAACGGC  
ATTACCAAATCTGCGTTCACCCGGTTTGACCGCCACATGCTTCCGTGTACCCCAACCAAGCTCCAAACCACGAATC  
TCATTTCCAGTATCATTCGTTTTTCCCTGGAACGCCAGACGCTTCTCGCCGAGGCCCACTCCGAGTCCGAGACTCAGA  
CTGGTTACTGCGCTCGCAAGCAAGGTACCTCTGTTATCTTTGGAGCACTGCATCACCTCCACATCTTTCATTTTTGTC  
TTGGCTATCGTGCATGTCACCTTTTCCCTACTCACCGTTGTCTTTGGAGGCGCCAGAATACGTGAGTGGAAACACTGGGA  
AGATTCAATCGCAAAAACAGAATTACGAGACAGCCGAGTTCGAAACC GAAGGTGACTAATGTTCAACAGCATGATTTTA  
TCAGGGGTCGTTTTGCTGGTTTCGGCAAAGACTCTGCCATCGTTGGTTGGTTGGTATCCTTTTCAAAAACAATTTTATGGG  
TCTGTGACAAAATCAGATTATGTGACATTACGGCATGGTTTCATCATGACCCACTGCAAGTGAACCCAAAGTTTAATTT  
TCACAAGTACATGATCCGTGCCCTCGAAGATGATTTCAAGCAAGTTGTTGGTATAAGTTGGTATCTGTGGCTCTTTGTGG  
TTATCTTCTTGTGCTTAATATCAATGGTTGGCATAACATATTTCTGGATTGCTTTTTATTCCCCTCATCCTTTTACTAGCT  
GTGGGCACTAAGCTGGAGCATGTAATAACCCAACCTAGCTCATGAAGTAGCTGAAAAGCATGCAGCCATAGAAGGTGACTT  
AGTTGTGCAGCCATCAGATGAACACTTTTTGGTTTTTCATCGGCCCCGAGTCGTCTCTTCTTGTATTCACTTTATCCTTTTTTC  
AAAATGCTTTTTGAAATAGCATTTTTTTTTTCTGGATATGGGTTACATATGGATTGACTCCTGTATAATGGGACAAGTTTCGT  
TACATTGTTCCAAGGCTCGTTATTGGGGTATTTATTTCAGGTACTATGTAGCTACAGCACCTTGCCACTCTATGCAATTGT  
TACGCAGATGGGAACTCACTACAAGAGGGCAATATTTCAATGAGCATTGCAACAAAACATTGTTGGTTGGGCACAAAAGG  
CAAAGAGGAGGAAAGGACTAAAAGCTGAGACTGAGAGCCATTTCTGGCCAAGGAAGTGTCTATGAGAGTTCTGGTGCTGGT  
GCTGGTGCTGGTTCTGCTACAGGAATCCAGCTTGGGTCAATTTTCAAGAAGGCATCTGCGCCAGGAGACAGTACCTCTGT  
CCCCAAAGCCGATGGTAACTGA

>CcML015 C.cajan\_47280

ATGGGTGGTGGTGGAGCTGAAGAAGGGAACAATTTGGAATTCCTCCACTTGGGTTGTTGCTGTTGTTTGTCTGTGCAT  
CGTTGCTGTTTCAATTTGCCGCTGAGCGTTTTATTCACTATGGAGGGATTTTTCTCAAGAAGAAGAATCAGAAGCCACTCT  
TTGAAGCTCTGCAAAAAGATCAAAGAAGAGTTGATGCTGTTGGGATTTATTTCTCTGCTACTGACAGTAACACAAAATGGG  
ATAGTCAAAAATTTGTGTTCCAGTGAGTTGGACTCACCATATGCTTCCCTGCAGCTTCGATCTTAAAGAAAAGGAGGAATC  
AACAAAACCACATCACATTTTTCAGACTTTTTTTTTCTTCTCTAATATTTCTGGCATAGCTAGACGCCTTTTLAGAAGAGA  
GTAAGAGTGAGAGTGAGAATCACGAACCATCAACAGTGACAAAACCTGGACACTGTGCTGCCAAGGGCAAGGTTCTCTG  
TTATCCGTGGAGGCATGTCATCACTTGCATATCTTTATTTTTGTCTTAGCTATCGTCCATGTAGCATTTTGTGTTCTCAC  
TGTAAGTTATTGGAGGGTTACAAATTCGTGAGTGAAGCACTGGGAAGACTCTATTGTAAGGAAAATTATGAAACACAAC  
CAGTTCTTGAACCAACAGTGACTCATGTTCAAGAACACGCTTTTCATTCAGAATCGTTTTACTGGTTTTGGCAAAGATTCT  
GCTGTTCTAGGTTGGGTGAAATCATTTTTTCAAGCAATTTTATGGATCTGTGACAAAATTAGATTATGTGACATTGAGGCT  
TGGTTTCATTATGACCCACTGCAGAGGAAATCCAAAGTTTAATTTTTCATAAATACATGATTTCGTGCCCTTGAAGATGATT  
TCAAAAAGTTGTTGGTATAAGTTGGTATCTTTGGATATTTGTGGTTCATCTTCTTGTGTTGCTTAATATCAATGGTTGGCAC  
ACATATTTCTGGATTGCTTTTCATTCCTGTCACTTCTTCTACTTGTGTGGGTACAAAGTTGGAGCATGTAATAATTCAATT  
GGCTCATGAAGTAGCTGAGAAGCATTACGCCATAGAAGGTGAATTAGTTGTTCAACCAAGAGATGATCACTTTTGGTTCA  
AACGACCCACATTTGCTCTTCTTGTATTCACTTCATCCTTTTCCAAAATGCTTTTGGATAGCATTTTCTTCTGGATA  
TGGGTCACATATGGCTTTGACTCCTGTATAATGGGAAAAGTGCCTTACATTGTTCCAAGACTCGTTATTGGGGTATTTAT  
TCAAATACTAATGTAGCTACAGCACCCCTACCCTTTATGCAATCGTTACACAGATGGGAACCTCACTTTAAGAAGGCTATAT  
TTGATGACCAAGTGAAGCAAGCAGACTTGTGGTTGGGCACAAAAGCAAAAGAAAAGGATTAAGAGGTGATAACAATGGA  
CAAGGAAGTTCTCATGCAAGTGTGGAATTCAACTAGGACCAATGTTTAGGAGAGCTTCTGCCACAGAAGACAACGTTGT  
TGTTCCCAGAAATGATGGGTCTGAATGA

>CcML016 C.cajan\_13783

ATGGACATAGGAAAAGAAAGAACTCTTGAAGAAACGCCAACATGGGCTGTCTCAGTATTTTGCTTCTTCTTTCTTACAAT  
ATCTTTGATCATTTGAGGGTGGTCTTTCACAAATGACTGAGATTTAAGGAAGAGGAAAGGAAAATCCTTGGGGAAGGCTT  
TGACAAAACCAAACAGAAATGATGAAATTCGGTTTCATGCTCTTCTTCTCACAAATATCGGAAGTGCCCATATCCAAA  
ATCTGCATACCAAGGATGTGGCAAATTCCTTCTTACCATGTAAAGATGCTGTGGACTTAACAGGATTAACCTCAGCACCC  
AGCTACTCGCACTTCAACCTCTGAATTTGACATAGCACCTGCTACCAACGAATCCACAATTGAGGTCAACTATTGTGAAG  
CAAAGGGAATGGTTAGTTTAAATTTCAAGTATGGAATTCGCAAGTAAATATATTATCTCGTTTTTGGCGGTGTTTAC  
ATCTTGTCTGCACATTGACAATGTGCCCTTGGTAAGGCAAAGATGAGAAGATGGAAAAGATGGGAGGACGAGACTCGAAC  
ACTTGAATATCAGATAGCTAATGATCCAAGAAGATTCAGTATACAGGTCAAACATTGATTGGCAAGCGTCATTTGAAAT  
TCTGGAGCTACCATTCTCCTTTGCTTTGGATGGTTTGTCTTTTTTCGGCAGTTCATGTTTCAGTCTCAAAAAGATGATTAC  
TTACTCTACGAAATGGGTTTATTGACGCTAATATTTCTTTAGGCAGCAATTTCAACTTCAAGAAATTTCTTTCTCGAAC  
TTATGATGAAGATTTTGAAGGTTATGGGAATCAGGATTTGGATCTGGATTTTCTCCATCTTTTCAATATTTTTCAGCG  
CACATGAGTTCTACAATTTACTACTGGCTTCCCTTTTATTTCCACTTGTGGTTGCTTTACTTACTGGGGCAAAAACCTCAAGTC  
ATAATAACAAGATGTGTAGATAGTTGCAAGGAAAACCCAGTATCAAAGGAAGTCTACTTGTAAACACTAGTGTGATGC  
ACATTTCTGGTTTTCATGACCTGAATGGCTTCTCCATTTACTCAAATTCATCCTTATCCAGAACTCCTTTCAACTTGCAT  
TCTTACCCTGGACTTGGTATGAATTTGGTCCAAGGCTTGTCTTCAATCGAGAAAAAGAGGACATTGCCATAAGGATTGCC  
ATGGGTGTAGCTGTGCAGCTCCTTTGTGGTTATGTGACACTGCCCTTTTATGCACCTGTTACTCAGATGGGTTCTAGCAT  
GAGGAGAGAAGTTTTCACTGAGAGTGTCTCCAAGGGCTCAAAAATGGCACAAAAGGCTAAACAATCTCTGTGTAATA  
ACAACCTCAACTTCAAGCAAACACTCAAATTTCTTGCATTCACAGTAGGTGAGAGTTCAATAAGAGGAGCAGTGGATAGT  
GTGCATAACCCAGATAATGTAGCAGTCACTAGCTATTTCTTCTCCCTCACCTCAGAGGTGGAAAAGAGAATTGCACCAAC

CCATGAGCAAGAGATGTCAAGTTCAGAAATCCCAACTATTGAGGAAGAGAATAACCCCAAGATCATCACCAGAGGAACCT  
ATGACGGTGAGATCTCATTTGGGAGCAGCTGGAAGAATGTGGGAAGTAGCAGGGGAATTGGAGAATTTGGTTCAATAACT  
GAAGAAGATGATGCTGAAAAATTTGTCTGAGTTGAATCCATAA

>CcML017 *C. cajan*\_37300

ATGGAAGAGAATGTACAAGAAACACGGTTCGTTGGCCCTTGACTCCTACATGGTCTGTTGCTACTGTGTTGACTGTCTTTGT  
TGCTGTATCTCTACTTGTGGAGCGCTCCATTACCCGTTTAAAGCAATTGGCTACGTAAAACATAATCGAAAACCATTTGCTTG  
CTGCTTTAGAGAAGATGAAAGAAGAGTTGATGTTACTCGGATTTATATCACTCTTATTAACAGCTACCTCACGCATGATA  
GCCAATATTTGCATTCTTCAAAGTTCACAAATAGTGC'TTTTGGCCCATGCCTAGATCTGAGATTGATGAACAGATGGA  
AGAGAATGGCTCTGAAGAGCGTAAATTTGTTGATGGCTTCTGTTTATCCACACTTATTTAGGAGGGTGTGAATGGAATAA  
ATAGAAGCTCCTGCAAAGAGGGTTATGAACCATTTGTTTATGAAGGTCTAGAGCAGTTGCACCGGTTCAATTTTTGTC  
ATGGCGTAACGCATATATCTTACAGTTGCCTAACAAATGTTGTTGGCCATTGTGAAGATTACAGTTGGAGAGTGTGGGA  
AGATGAGGCTCACATGGATCGGCATAATTCATTAACGAAATTACAAAAGAGTTGACTATGCGAAGGCAATCGACCTTTG  
TCAAGTCTCATGCATCAAATCCATTGGTCAAAAATGGTTCCTCATTTGGGTGACATGCTTTTTCCGACAATTTGGACGT  
TCTGTGGTTCGTGCTGATTACCTTACGCTTCGCAAAGGCTTCATCATGAATCACAACTTTTATTAAAATATGATTTTCA  
CAGCTACATGGTTCGATCTATGGAAGAGGAATTCCAAAGGATAGTTGGTGTGAGTGGCCCACTCTGGGGATTTGTTGTTG  
CCTTCATGCTTTTTTAACATTAAGGATCTAATCTTTATTTCTGGATAGCTATCATTCTGTATCTCTTGTGCTCTTGGTG  
GGAACAAAGCTACAGCATGTTATTGCAACCTTGGCATTGGAGAATGCTGGAATTACAGGGTCTTCTCAGAAGCAAAGTT  
GAGGCTCCTGATGAAC'TTTTCTGGTTTAAACAAGCCTGAAC'TATTGCTGTCTTGTATCCATTTTATTCTCTTCCAGAATG  
CATTTGAGCTGGCTTCGTTCTTTTGGTTTGGTGGCAGTTCGGATATAAATTCCTGCTTTATTAGGAATCACCTTCTCCTT  
TATTTAAGGCTAATCTTGGGGTTTGCAGGACAGTTTCTTTCAGCTACAGCACCTTGCCTCTATGCACTTGTACACA  
GATGGGAACAACTATAAGGCAGCACTAATCCCTCAGAGGATAAGAGAAACAATTCATGGATGGGGTAAGGCAGCTAGGA  
GGAAGAGGAGCATGGTATGTTACATGATGACTCCACCATTATACAGACACAAGCTGTGTGCTATCGAAGAAGAT  
GATCAATTAATTGATACCCCTGGAGACCCCTGTCACTGGCCCTGAAGTAGAATTGCAACCAGTAACAACCTGTTACATCTTC  
CCCTTCTCCCATTTGCTAATGAAACTTCAAGTAGGGCTGTTACACCCCTCCTAAGACCCTCTGCCTCAATATCTTCAGTGC  
AATGCAGTTCCAAAACGGAAGCAATTCAGATGCTCCTCTATGCCAAGTGAAGATAA

>CcML018 *C. cajan*\_37291

ATGGAGGAGAATGAACAAGAATCACGACCATTGGCTTTTACTCCAACATGGTCTATTGCTATTGTCTTAAACATTTTTCT  
TGCTTTTTCTTGTCTTCTAGAGCGTGCCATTACCATTTAAGCGATTGGTTGAAGAAAACGAATCAAAGCCCTTTCTTG  
CAGCATTGGAAAAATGCAAGAAGAGATGCAGCTGCTTGGATTTGTATCACTTCTATTAATAGCTACCTCAGACATGATA  
GCAAATATTTGCATTCCAGAGAAGTTCACAAATGATGCTTTTGTCTCCATGTACTAGATCCGAGATTGCTGAAGAAACGGA  
AAAGAATGACACAGAAGAGCATAAATTTGTTGATGGCTTCCACTAACCACGCGTAATTAGGAGAATATTGGATGACATAA  
ATAAAAAATCTTGAATGAGGGTTATGAAC'TTTTGTTCACATGAAGGTCTAGAGCAATTGCACCGTTACATTTTTATC  
ATAGCTGTAACACACATATCTTTTCAAGTTGTCTCAAAATGTTGTTAGCAATTGTGAAGATTACAGTTGGAGAACGTGGGA  
GAATGAGGCTCAAATAGATCCACACAATTTGTTCA'TTTTCTGAAATCCCAAGACATGTGCCAGCACTAAGTCAAACATCCT  
TAATTATGGTTCATAGATCAAATCCATTGTTTACAGAAACACTTTCCCTCATTTGGGTGGCTTGTTTTTTACGACAATTTTGG  
AATCTTTGGTTCGCAGTAATATCTTACACTTCGCAAAGGCTTCATCATGGTATCCAATCTGTTTGTCTGAAGTCTAA  
ATGTTTCTTATTCGAAAGCAACATAATATGCCTACTAGAAAAATAAAATTTGTGACGAAAAATTTGTCCCCTCTGGG  
GATTTGTTGTGCTCTCATGCTATTCAACATTAAGGATCAAATCTCTATTTCTGGATAGCTATCATTCCAATTTTTCTA  
GTTCTTTTAGTTGGAACAAAGCTACAGCATGTTGTTGTAACCTTGGTATTAGAGAATGCTGAAATAACTGATTTCTCTC  
TGGAGCAAAGTTGACACCTCGTGAAC'TTTTCTGGTTTAAAGAAGCCGAACTACTACTTTCTTGTATTCAATTCATTC  
TCTTTCAGAATGCATTTGAGTTGGCTACATTCTGTTGGTCTGGTGGGAGTTTGGAAACAGCTCTTGTCTTAAACAGGAAT  
CATCTCCTCGTGTATTCGAGGCTAATCTTGGGGTTTCA'TTGGACAGTTTATCTGCAGCTACAGTACTTTGCCCTCTATGC  
ACTTGTACACATATGGGAACAAACTATAAGGCAGCATTAATTCAGAGAGTGAAGGGCGACAATTGATGTCTGGGGGA  
AGGCAGCAAAGAGAAACAGAAAGCAAGGCAAGGTCACTGATGACTTTGAATTAGAGCCACTAAGGGAAGAAACTTCAGCA  
AATAATGTTTCAAGTAGGCCAGTTGACCCCGTCTTCGACCCTCTGCTTCAAGTTAACTCAGAACTCCGTTTTAGAACAGA  
AACAAATCCAAGATCTACTTCTATGCCAAGAGAAATATAA

>CcML019 *C. cajan*\_09813

ATGGCAGCATATGCATCTGGTTATTCTCTAGAACACACTCCAACATGGGCAATTGCTCTTGTTCCTTCAATCTTATCTC  
CATCTCAATCATCTTGGAGCATCTCATTCTATCTCATAATCAAATGGTTGAGGAAACATCGGAAGATAGTTGAAGCAATAG  
AGAGGCTTAAATCAGAGTTGATGATCTTAGGATTCATGTGCTTTTGTGACAGTAACTCAAGATGCCATAATTGAAATC  
TGCATACCAATGAAGACTGCAGATACTATGCTTCCATGTGCTAAACGTACTACAAATGATACCGCAACAAATTTGGATTC  
TTGCACTGCCAAAAATGCAAGTAAGTTGCTTTAGTATCAAACATGGAATTCATCAACTTCATATGTTTCTGTTTTGTTT  
TAGCTGTATGCAAAATCGTGTACAGTTTCTCACCGTTTCTCTGGCAAGGGCCAAGATGAGGCCTGGAAGCTTGGGAT  
GAAGAGACTCAAACAATCGAATATGAAATGCCAAACAGCCCTAATAGATTAGATTCAGAGGCAACAACACTTCGGAAG  
ACGACACATATCTACTCGTACGGCATCACCATATGTTTGGATTAAAGTGTTTTTTTCAGACAGTTCTTCCATTCAGTAG  
AAAAAGTTGATTATCTCACCTGAGGCATGGTTTTCATATCAGCACACTTTTTCAGCTAGGAACAGCAACTTCGATTTCCAA  
AATTACATTGAACAGTCACTTGGAGGAAGATTTGAGAATCATAGTGAACATTAGCCCTGTGATGTGGTTTACCCTTGTAT  
TTTTTTGCTCGTGGATGTACATGGCTGGCATGTATACCTCTGGTTATCCTATGTTCCCTCATGCTGGTTCTGGTTGTGG  
GAGCTAAACTTGAAGTCATTTGTCGACGAAATGGCTTCTCAAATGAAGGATATCAATAATGTAACCAAAGGGACCCCACTT  
GTTTGTCCAAGTGACAAACTCTTCTGGTTCCGCCATCCAGGATTTGTGTTAACTCATACATTACACTTTATTTGTGAA  
TGATTCGAGCTTGCCTTCTTTATATGGGTATCAACACAGTTTGAATAAATTTCTGCTACCACGAACACAGATCATTTA

CAATCATAAGAGTGGTGATAGCGGTCGCAGTTC AAGTGCTATGCAGCTACGTTACTCTCCCCCTCTATGCATTAGTGGCG  
CAGATGGGTTCCACAAGTGAAGAGCAAAGCGTTGGCTAAAATCTGAAGCAGTGGCATGTTGAGGTGAGGGAGAGAAGGAG  
GAAGCAAGAAAAGCTTGTGAAGTCTTTTAGTTTTAGGCACAGAAATAAGTCCTCAGAATGGGGCCAAGGAAATAAGAGTG  
CCCCTGAGTTTTCTCCACTCTAGGTGAAAGCAATCGTTCCTATGACGAAGGAGAAATTGTAGAAGAATTGGAGCATTCCG  
GTGAAAACCAAGGCTAGCTCGTCAAGTGATCCACCTAGTTTTGTCTAA

>CcMLO20 C.cajan\_24758

ATGAAGCAGCCCAACATCTCTAATTGCCCTCTTATCGTACATATGGCGAATGTTTCAGAGGGAACCTTTAGAAAACACACC  
AACATGGGCTGTGACAACAGTTTTGCTTCGTATTGCTAGTAATCTCTATTTCCATTGAGCAGTTGCTCCATCTTTTGGCCA  
GGTATTTCAAAGGAAGAGGAGGAAGTCACTCCTAAGGCCCTTGAAAAGATCGAATCAGAATTGATGCTTCTGGGTTTC  
ATGTCCTGCTGCTAACGGTGAGTGA AAAACGGATTGCAAATATTTGCATAACAAAGAGTGTGGTGA AACTCTTCTTCC  
CTGCGCAACCATGACTTTTTGACGTGACCAAGGAAGAAACAAAATGTGCCGAGCAGGGCAAAGTATCATTGGTGTGAGGA  
AAGGTGTCCGAGAGTTGCAGTACTTCATCTTTTATCTGGCTTTGTGTGATGTTATTTCTTGCATTCTCACCTTTAGTCTT  
GGAATGGCGAAGATGAGACGATGGGAGTCTTGGGAAGCAGAACTAGAACATTGGAATATCAGTTTCAATATGATCCACG  
GAGTTTTCAGCTCACACGTGAGACATCATTGGGAAGCGGCATCTTA ACTATTGGAGTAACAACCCCTATACTGTTTTGGC  
CTGTCTGTCTTGTTAGACAATTTTATAGATCTGTCCCAAGGTTGATTACTTCACTCTTCCGACGTGGATTATCACGGCC  
CATTTTGCAGAAGGAAGTAACCTTTGACTTCCAAAATTTTATTAACGGGCTTTGGAGAAAGATTTTGGAGTGGTAATGGG  
ATAAGCTGGTGGATTTGGATCTTCTCTGTACTGTACATATCTTGAATGCAAATGATTCTACAGCCATTTCTGGTTAC  
CGTTTAGTCCGCTAATGGTGTCTTTGTGGTGGGAACAAAGCTACAAGGCATTGTAACACATATGTGTTTGGATAGTGAT  
GACAAATCCCAAATAATCAAAGGAAGTTTGTCTGTGAGGCCAGTGACCCTTTTTCTGGTTTGGATGGCCCAATCTGCT  
GCTTCATCTCATTAGCTTCGTATTGTTTCAGAATTCCTTCCAAGTAGCATTTTTTACATGGACTTCGATCCGATTCCGGGA  
TCAGATCATGTTTTCATCGAGGAATTGAGAATATCATATAAGGGTAGCAATGTGTGTTTTCGGTACAAATCTCTGTGGC  
TATGTAACACTACCTCTCTATGCTTTGGTAACTCAGATGGTACTCAATGAGCAAGGATGTGTTTGGCGGAGAATGTGAT  
TAGAGGCATCCACATTTGGCTGTGAGAAGGCCGAAAAGAATGTGGCTCATAGGAATCCACATTCACAAGACTCATCTTTAG  
ACACTTCCCTTTGCTTGA AATTTCACTAGAGTCACCTTCTTTGAGTTTTGATGATCCACCTCCATTTTAATGGATCGT  
TCATCAGATGATAATAAGCACGTGGCTGTTACGGAAGAAAATATATCGAGTGAACA ACTAGGTTCAATTTCAAGGATTTCA  
TCTGCAAAACACAGGAAAACCAAGGCAATTTTGA

>LaMLO1 AOCW01137726\_AOCW01137727

ATGGCTGAAACCAGAATTTATGAAAGAACGTTAGAGGAAACTCCAACATGGGCTGTTGCAGTTGTTTGGCTTCGTGCTGCT  
TTTTATTTCAATCATCATTGAATATAGTATTCATGCTGTTGGAAAGTGGTTCAA AAAAGAAGCACAAGAAAGCTCTCTATG  
AAGCGTTGGAAAAGGTCAAAGGAGAGCTTATGCTGCTAGGATTCTTATCCTTGCTCCTAACAGTGTTACAAGATCCAATA  
TCTAAGATATGTATATCAAAAAATGTTGCATCTACTTGGCATCCTTGTCTACTCCAAGGCAAGTAAA ACTGAAGAAGA  
TTCTCATTCTGATGAAAATGATACTAATTCAGAAAGCTCCTCCAATATTTGAACCCCATGCCACGGCGTTTTCTAGCTA  
CGAAAGGATATGATAAATGCGCTGCAAAGGGAAAAGTTGCTTTTTGTTTTCTGCATATGGGGCTCACCAGCTCCATATATTC  
ATCTTCGTGCTAGCCATTTTTCATATCCTACAATGCATTATAACTCTGGCTTTGGGAAGAACTAAGATGAGACGCTGGAA  
GACATGGGAAAATGAAACAAGGACTATTGAACATCAGTATTATAATGATCCTGAAAGGTTCCAGGTTTGGCGAGGGACACAA  
CATTTGGACGAAGACACTTGA AAAAATGGAGTGAGTCATCAATTTCTTTATGGATGGTTAGCTTCTTCAGACAATTCATT  
GGATCAATTAATAAAGCTGATTATTTTGCATTAAGGCAGGATTTATCATGACACATTTGGCACCAGGAAGTGATGCAAA  
ATTTGATTTCCAGAAGTATATCAATAGATCACTTGAAGAGGATTTAATGTTGTGGTGGGAATAACTCCACTCATATGGT  
TCTGTGCTGTGTTATCTTACTGACTAATACTCATGGGTGGTATTCTCATTTTTTGGCTTCCATTTATCCCATTTCATCATA  
GTCTTATTTGGTTGGTACTAAGTTACAAATGATCATAACAAAGATGGGACTGAGGATTCAAGATACAGGAGAAGTGGTTAG  
GGGTGCACCTTTGGTTTCAGCCAGGAGATGAGTTGTTCTGGTTCAATCGTCCACGCTTCTTCTTTTTTAATTCATCTTG  
CTCTCTTTCAGAATGCATTCCAATTTGGCATTTTTTACTTGGAGTACTTATGAATTTGGCTTACACTCTTGGCTTCCATGAT  
ACTACTGCAGATATTTGTCATCAGAGTAACAATGGGGGTTCTGGTACAATTCCTTATGCAGCTATGTA ACTTTGCCTCTTTA  
TGCTCTAGTCCACACAGATGGGTTCAACAATGAAACACACAATTTTCAATGATAGAGTAGCAACAGCACTAAAGAACTGGC  
ACCACACAGCCAAAAGCATGTA AAGACAGCAAGCATGCTAGTGCCAATGTCACACCATTCTCAAGCCGGCCAACCACC  
CCGACACATGGCTTATCTCCGGTACACCTGCTGCAACAGCATCACGGCCGAGTGATAGCACACAAACCTCTCCAAGGAC  
CTCAA ACTATGAAAATGAAGAGTGGGATATTGAAGGGTCAGCTTCCCAACCAACATATTATAGGAGAAGGAGATGAGA  
CACAAATTTTGGAGCAAGATTCAACAACACAATTTGCCTATTAGCTCTCAACATGAAATCAGCATAAGTGTATCAGAATTT  
TCTTTTGGAAAGCGGCTTCATAGAGATTATGAGTAG

>LaMLO2 AOCW01065981\_AOCW01147792

ATGGGTGAAAAAGTTTATGAACGAACGCTTGAGGAAACACCAACATGGGCTGTTGCAGTTGTTTGGCTTTGTACTGCTTTT  
TATTTCAATCATCATTTGAATATATTTATTCATGCTATTTGGAAAGTGGTTCAA AAAAAACCACAAGAAAGCTCTTTATGAAG  
CATTGGAAAAGGTGAAAGGAGAGCTTATGCTGCTAGGGTTCTTATCCTTGCTCCTAACAGTGTTCCAAGAACCAATTTCT  
AAGATCTGTGTATCAAAAAATGTTGCATCTAGTTGGAATCTTGTCTACTCCAAGGCTAGTAAA ACTGAGAATGATGATC  
TGATAATACCAATCTTAGGAAGCTCCTTCAATATTTGGAACCCATGCATAGGCGAATTTCTAGCTACAAAAGGATATGATA  
AATGTGCTGAAAAGGAAAAGTTGCTTTTTGTTTTCTGCATATGGGATTACCAGCTCCATATATTTCATCTTTGTGTTAGCT  
ATTTTTCATATCCTACAATGCATTATAACATTAACCTTTGGGAAGAACTAAGATGAGAAGGTGGAAAACATGGGAAGATGA  
GACAAGAACTATTGAATATCAGTACTACAATGATCCTGAGAGGTTTCA GATTTGCGAGGGACACAACATTTGGACGAAGGC  
ACTTAAATAAATGGAGCGAGTCATCAATTTCTTATGGATGGTTTGGCTTCTTCAGACAATTCATTGGATCAATCAGTAAA  
GTTGACTATTTTTGCATTAAGGCATGGATTTATCATGGCACATCTGGCACCAGGAAATGATGCAAAATTTGATTTCCAGAA  
GTATATCAATAGATCACTTGAAGAGGACTTTAATGTTGTGGTGGGATAACTCCAATCATATGGTTCTTTACTGTGTTAT

TTCTGCTGACTAATACTCATGGGTGGTATTCTCAATTCTGGCTACCATTTCATCCCATTTCATTATAGTCCTATTAGTTGGT  
GCTAAGCTACAAATGATCATAACAAGGATGGGACTGAAGATTCAGATAGAGGAGAGGTGGTGAGGGGTGCACCTCTGGT  
TCAGCCAGGAGATGAGTTGTTTTGGTTCAATCGACCCGAGGTTCCCTTCTCTTTTTGATTTCATCTTGTCTCTTTTTCAGAAATG  
CATTCCAAC TAGCATTTTTTACTTTGGACTACATATGAATTCACCTTTGTACTCTTGTCTCCATGATACTACTGCAGATATT  
GTCATAAGAGTAACAATGGGGGTTGTGGTACAAATTCATGCAGCTATGTGACTTTACCCTTTATGCTCTAGTCACACA  
GATGGGTTCAACCATGAAACACACAATTTTTCAATGATAGAGTAGCAACGACTGAAGAGCTGGCACCACACAGCCAAAA  
AGCATGTCAAAGACAGCAAGCATGCTAGTGTACACACTTTTTCAAGCAGGCCAGCAACCCCAACACACGGGCTT  
ATCTCCGGTACACCTACTGTACAGGCACCACGGCCAGTGATAGTACACAACTTCTCCAAGGGCATCAAACATGAAAA  
TGAAGAGTGGGGTATTGAAGGGTACAGCTTCCCCAAACAACCATAATACTATAAACATAGGTGAAGGATATGAGACTCAA  
TGCAAGTTCTGGAGCCAGATTCAACAACAGAATTGCCTATTAGCTCTGAACATGAAATAAGCTTAAGTGTATCAGATTTT  
TCTTTTGAGAAGCAGCACATTGGTAGAGATTATGAGTAG

>LaMLO3 AOCW01159416

ATGGAAGAAAATGAAAAAGAAGATCCTTGGATGCTACCCCACTTGGGCTGTAGCAACTGTCACTCTAATGGTTTC  
TCTTAGTTTCATGTTTCAAATCACATTAGAAAAATTTGGAAAGTGGTTGGACAGAATAAGAGAAAATCTATGCTTTCTG  
CTCTTGAAGAGTCAAAGAAGAACTGATGCTTTTTGGGCTGCTTTCCTATTGATGGGTTCATTGGACTATTTTTGTGGCA  
AAGATTTGTGTCAAGGAATCAGTATTA AAAAACCAGATTTATTCCATGTGCAATAGAAAAGAATTCTGGAACAGTGAACA  
CATTTTCTGGCTGAGTTT CAGAATATTCAAATAGAACAAATGCTAGAAAGAAAATGTGAACAAGGGTCTGCATAATTATTGTC  
CTGAGGGTAAGGAATCATTCGCATCTTATGAAAGCCTTGAGCAGCTTCATTTCGTTACTGTTTGTCTTGGGGTCACTCAT  
GTTTTCTATAGCTTTTATTGCTGTTGCCTTGGCCATGATCAAGATATATAGCTGGAGAATATGGGAAAGTATGCAAAAGAC  
TATGGCTACACAAAGCTTCCAAGATACTCCACAAAATACATTAACATAAGGTTGAGTCGACTCGGTACATTCATCTTTC  
ACCACACATCTCATCCC TGGAGTCATCACAAAATCTTGTTTGGCTGCTATGTTTCAGTCGTCAATTCTGGAGTTCTATC  
AACCGAGCTGATTATATGGCATTGCGCTTTGGCTTCATTACCAATCATGAGCTTCCCTAACAATATGATTTCCACAATA  
TATGCTTCGTAGCATGGATGAAGAGTTTTCGTGACATTTGTTGGTATTAGCGTGCCACTATGGATATATGCCATATGCTGCA  
TTATTTCTAAATTTTTCATGGAAGCAATATTTACTTTTTGGCTTTCCTTCCATCAATTCTGATTCTCATGATTGGTACT  
AAGTTGCACCGTGTGGTGGTAAAGTTAGCTGTTGAAATAACGAGTCATTGCCAAGACACAAGACCTCTTAACCTAAGAGA  
TGAGCTCTTTTGGTTTGGAAAACCCAACTTCTATTGCGGTTAATACATTTGATATCATTCTTGAATGCTTTTGAATGG  
CAACATCTTATGGTCCCTGTGGGAAATTAAGAGGCTTCTTGTTTTATGAAGAACCGAACGTTTATTATGATCCGTTTG  
TCATTTGGGGTTCATCTCCAAGTCTGGGGCAGCTTTATAACATTTCTCTCTATGTTATCATCACACAGATGGGGTCAA  
GATGAAGAAGTCTGTGATATCTGAAAATGTAAGAAAATCACTCTCTAAATGGCAGGGAAGAGTGAAGAACAGGCAAGGTT  
CCTCTTTGATGCATGACTATGAATCATTTCCAAGTTGTGAAGATTATCATCATCATAATGTATAAG

>LaMLO4 AOCW01114694\_AOCW01136624

ATGGCAGGAGGAATCGGAGGAAGAACTTAGAGCAAACCTTACTTGGGCCGTGCGAGTTGTTTGTGTTTGTGTTTGTGTTT  
AATTTCTATAACCATCGAGCACACCATTTCATCTCATAGGAAAGTGGTTGACGAAGAAGAACA AAAAGATCTCTGTACGAGT  
CACTTGAAAAGATAAAAATCAGAGCTTATGTTGTTAGGTTTCATATCGTTGCTCCTAACAAATAGGACAAAAGTCTAATATCA  
AAGATATGTATATCAGAAAAAGTTGCGCGTACATGGCATCCATGTAGCGATAAAGAGGACCACACGAGTTTCATCAAAAA  
CGAACTAATCAACGGAGATTAATAGCGACGACGTTGTTCTTTGGTTTGGAGAGTGA AAAATCCACGACGAGTTTTAGCGG  
GAGGAGGAAGCGATAAATGTGGAAGGGTAAAGTCCCGTTTGTGTCAACGGATGGTATTTCATCAACTCCATAGATTTATC  
TTCGTGCTGGCTGGTTTTTACGTCCTTTACTGCTTTCATTTGACTCTTGGAAGAGCAAGATGAGGAGGTGGAAGCA  
ATGGGAAGAGGAACTAAGACACTTGAGTACCAATTTTCATATGACTCTGAGAGATT CAGATTTGCAAGGGACACATCGT  
TTGGGAGAAAGACACTTGAGTTTTCTGGACAAAAATCCTCTTCTCATTGGATTGTTTGTGTTTCTTCAGGCAATTTGTGCGG  
TCAGTGCCTAAAGTGGATTACTTGACCTTGAGACATGGATTTATCACGGCACATTTGGCTCCACAAAAGTCAACAGAAGTT  
CGATTTTCTGTAATAATATAAAAAGATCGTTGGAAGAGGATTTCAAAGTTGTAGTAGGAATTAGTCTCTATTCTGGTTCT  
TCGCAGTCATGTTTCTCTCTTCAACACTCATGGCTGGTACAGTTATTTATGGCTTCCATTTATCCCTTTGATTATAATC  
TTATTAGTTGGAACCAAGCTTCAAGTGATCATAACGAAGATGGCTCTTAGTATTCAACAAAGAGGAGAGGTCTGAAGGG  
TATGCCATTGGTGAACCTTGGGGATCACCTCTTTTGGTTTAAACCGACCTAGTCTTATTCTTACCTCATCAATTTTGTTC  
TCTTT CAGAATGCATTCAGCTTGCCTTCTTTGCATGGACTTCGTTTGAATTTGGGATTAATCTGCTACCATTTCGCAT  
ACAGAGGATGTGGTGATTAGAATCTCAATGGGGTCTCATTCAAATTCATGCAGCTACGTTACACTTCTCTCTATGC  
TCTTGTACACAGATGGGTTCAAGCATGAAGGCATCTATATTCAACGAAAGGATAGCCATGGCCCTACGAAATTGGCACC  
ATAGAGCAAAGAAACACAAAAACAGAACCAGAAATGGTTTCATTATCAATGACCCCAATATCAAGTAGGGCTACAACCCCA  
ACTCATTCTATGTCCCCTACCCATCTTTTAAAGCCACTATCGTTCCCAAATAGATAGCTCTTATTATGCCTCTCCAAGAAG  
ATCCATTGAAATAGAAGATTTCTCTTCTACTTCTTACTTCTTACCACCACAAGAATAAAAAGGCTAAGGTTGATTATTTTT  
TTGATCCAACCTCTTCTACTACTACTACTTCAACTAATCACCATGAAATTGAAATGGACCAACATATTAATGAAGTA  
AACCCCACTACCACACAACATGAGATTGTTATTGCACATCATAGCAAGGAGTTTTTCATTGATAAAGGAACTACACAATC  
AAGTGCACAAAATACTAGCAAAC TAGGTAGATGA

>LaMLO5 AOCW01127929

ATGGCTGAGGAACTGAACCAATCTCTGGAATATACACCAACATGGATTGTTGCTGGTGTGTTGCTCCATCATTGTTTTCAT  
CTCTCTAATTGTTGAGCGTTGCCCTTCACTGGCTTGGAAAGTACTTAAAGCGTGAAAAGCAGACTGCATTATATGAGGCCT  
TAATAAAAATTGCAAGAAGAATTGATGCTTTTTAGGGTTCAATTTCCCTTCTATTA ACTGTGACTCAAAAATATAATAAGTGAT  
ATATGCATCCCACCTAAGCTTGCAACCCAAATGCTTCCATGCAAGAGGCCCTCATGAGTCTT CAGAAGAATCAACACATAG  
ATTGATCTACTATGATACTATAATCAACAGAAGAAGGCTTTTTTCTACAGAACTGGTTTTGAGCATTGTAAGGAAAAGG  
GAAAGGTTCCGCTATTATCGCAAGAAGCATTACATCATCTTACATTTTTCATCTTTGTATTGGCCATTGTACATGCAATA

TTCTGTGTCACCACAATGCTTCTTGGAGATCATCTATATATAAGAAATGGAATTGACTTGTCTCTTAAATTTCCAATTTT  
CTCGGTTTTTTTCGTATCCAGATGATTACCATCATCATGAGTTCCTCAAAAAACATGCTGATGGATATTGGAGAAGAGCAG  
CTGTTGTAGGCTGGCTGATATCATTCTTCAAGCAGTTTTATGGTCTGTACTGAATCCGACTACACTGCACTGCGTCAA  
GGATTCATCAAGGAACATTGTTTACACAAAACCTGATTTAATTTTCAACAAGTACATAATGCGGACGCTAGAAGTTGATTT  
CAAAAAAATGTAGGCATAAGGTGGCACCTGTGGCTTCTTGTGTACTGTTTTTGTCTAAATCTTTCATGGTTGGCACA  
CTTATTTCTGGCTATCTTTTACCATTGATAAATCTACTTGTGCTGGGGCAAAGTTAGAGCACATAATAGTTCTGTTTA  
CGCAGGAATCGGTAGAAAAAATTTGGCAGAGGAATAATTTTGTACACAAGCTGTGGGAAACTTGGGGAAAGAAAAGAACA  
AGATGCAAAAACCTGTGAAACCATCAGATGGATACTTCTGGTTTAAACCGCCCTGCCCTTGTCTTGACTTACTTCATTTCA  
CTTTGTTTTCAGAACTCTTTTTGAGATTGCATTTTTCTTTTTGGATTTGGTGCACATATGGATTTGATTCATGCATCATGGAG  
AAAATAGGCTACATCATCCCAAGGATTATAATGGGTGTAATTTGTTCAAGTGTCTTGCAGTTACAGTACCTTGCCTTTGTA  
CACTCTTGTGACTCAGATGGGTAGCAGATTCAAGAAGGGTATGTTTGTAGAGGTGGTTGAGGCAGGTATTTTGTAGTTGGG  
CTGGAAAATCTATAAGTGGAGCTGATGATGAGTCTCTGAACCTGATAGAAGGAGGACCATGTCTCACAAAATGATCAAA  
GAATCATTTCAACCTTCTCAAATTAGTGGACAAGCAATCATCATGGTGAAGATGAAACAACATCTACAATTGAGCTTCC  
TACATTGTCAAAGTTCCATTGA

>LaMLO6 AOCW01133085

GGTGGTGGTGGTGGTGGCGGCGAAGGTGGTCCAGGTCACACTGATAACAGAACTCTAGAGGAGACACCTACGTGGTCTGT  
CGCCATGGTTTTGTGCAGTTATCGTTATCATTCTATATCGTTGGAGAAATTTATACATAAATTCGCAAAGGTGTTTTGAAG  
CAAAAAAGAAGCTTGTCTTGTCTGGAAGCTCTTGAAGAATTAAGCAGAGCTTATGGTTTTGGGATTTATTTTCATTGCTC  
TTAACATTTGGCCAATCCTACATTTCTAAAGTGTGTGTTCCCTCAGTATTATGCAAATCAAATGTTACCATGTAGTCGGAA  
GAAGTCACATGGGCCCTCCAGAGGAAGGGCACGATACGGGTGGTGGTGGTGGTGGTGAATGAAGCCGCGGAACATCGTCGCA  
GGCTTTTGTATATGAACGTAGGTTTCTAGCTGGTGGTGGTGGATTTGTGAGTGTAAATTTGGGATCTGAGCCTCTTATA  
TCCGTGGGAGGTTGCATCAGTTACACATTTTCAATTTCTTGGCTGTCTTCCATGTGATATACAGTGCCTAACAAT  
GACTCTTGGAAAGTCAAGATTCTGTCATGGAAGCAATGGGAACAGAGCCATCTCGTTGATGAAGACGCCTTGAATGATC  
CCAGAAGATTACAGCTTACTCATGAAACATCATTGTGAGGGATCACAGCAGTTTCTGGACAAAACACCAGTTTCTTCTC  
TATTTTGTATGTTTTCTTTGACAATTTATCAGATCTGTTTCTAGGGCAGACTACTTGACCATGCGACATGGATTTGTGTC  
TGTCCATCTAGCACCTGGAAGTAAGTTTTGATTTTCAAAGTACATCAAAGGTCAATAGAAGATGACTTTAAGGTAGTTG  
TGGGAATCAGTCCAATACTTTGGGCTTCAAGTGGTGTATTCTTGTCTTGTAAATGTGAATGAATGGCACGCATCATTGGG  
TTGTCCTTTCTTCCACTAGCCGTGGTCTGTCTGTTGGAACAAAGCTTCAAGCGATTATAACTCGAATGGCACTTGACAT  
AAAAGAAAGGCATGCTGTAGTGCAGGGTATCCCTCTTGTGCAAGTCTCTGACAAGTACTTTTGGTTTTCAATGGCCTCAGT  
TAGTCTTTTATCTCATTCAATATGTCTCTTTTCAAGATGCATTTGAGCTGACATTTTTCTGCTGGACGTGGTATGAGTTT  
GGCTTGAATCTTGTCTTTTACGAGAATAAAAAATTTGATGTATTTTCAAGATTTGCTGTTGGGGTTCGGAGCACAAATCGTGTG  
TAGCTATGTCACACTTCCACTCTATGCGCTGGTTACTCAGATGGGATCAACAATGAAGAAGTCAATATTTGATGATCAAA  
CATCTAGAGCACTGAAAAAGTGGCATAAGAATGCTCTGAAGAAGGCAAATTCAAAGGGTCTGGTACAGAAATTAGAACA  
TTGGGTGGGAGCCCAAGACATTCACCACGTGCAAGTGAATGCTTATTCTAACATTGCAGTAACAGAAACACAGATGAC  
TGAACAAACCCACCAAGGATTATAA

>LaMLO7 AOCW01138453

ATGGGTGGAGGTGGAGATGCAGGTGCAGGTTCTCATGGTCATGGTGATAACAGAACTCTAGAGCAAACCTTACATGGTC  
TGTTGCTGCTGTTTTGTGCAATTATTTGTTATCATTCTATATCATTGGAGAACTTATACATAAATTCGCATCGATGTTT  
AACAAAAAAGAAGCTTGTCTTTGTTAGAAGCTCTTGAAGAATTAAGCTGAGCTTATGGTTTTGGGATTTATTTTCATTG  
CTCTTAACATTTAGCCAATCCTACATTTCTAAAGTGTGTGTTCCCTCATCATTATGCAAATCAAATGTTGCCATGTTCTCG  
TCCGGAAGAGTCTGATGGAGCAGCACATGGACCCTCTAAAGAGGAGGAGGGTGGCGAGGATGAAGGCGAACATCGTCGAA  
GACTTTTTATCGTATGAACGTAGATTTCTTGTCTGGTGGTGGTGGAAATGGTCAATTGTAAACCGGGATATGAGCCTCTTATA  
TCTGTGAATGGGTGTCATCAGTTACACATTTTCAATTTCTTGGCTGTCTTTCATGTGATATATAGTGCATAACGAT  
GACGCTCGGAAGAGCGAAGATTCGTGCATGGAAGGAATGGGAACAAGATCATCTCATTGAAGAAGACGCCTTGAATGATC  
CTAGAAGATTCAGGCTTACTCATGAGATTTCAATTTGTGAGGGATCACAAAGTCTTGGACAAAACACCAATTTCTTCTC  
TATTTTGTATGTTTTCTTTGACAATTTATCAGATCCGTTTCTAGGGCAGACTACTTGACCATGCGACATGGATTTGTGTC  
TGTCCATTTAGCACCTGGAAGTAAGTTTTGATTTTCAAAGTACATCAAAGGTCAATAGAAGACGACTTTAAGGTAGTTCG  
TCGGAATCAGTCCACTACTTTGGGCATCAGTGGTGTATTCTTACTTGTGAATGTGCATGAATGGCACGCTGCATTCGTG  
TTGCTTTTTCTTCCATTATCGGTGGTCTGGCTGTTGGAACAAAACCTTCAAGCAATTATAACTCGAATGGCACTTGACAT  
AAAAGAAAGGCATGCTGTAGTACAGGGTATCCCTCTTGTGCAAGTTTTCGGACAAGTACTTCTGGTTTTCAATGGCCTCAGT  
TAGTCTTTTATCTCATTCAATTTTGTCTCTTTTCAAGACGATTTGAGCTGACATTTTTCTGCTGGACATGGTATGAGTTT  
GGCTTGGGTTCTTGTCTTTTACGAGGATAAATTTTTATGTTCTTCAAGATTTGCTATTGGGATCGGAACACAGATCGTGTG  
AGCTATGTCACACTTCCACTCTACGCGCTTGTACTCAGATGGGTTCAACAATGAAGAAGTCAATATTTGATGACCAAAC  
ATCGAAGGCGCTGAAAATGTGGCATAAGAATGCTCTGAAGAAGGCAAATTCGAAGGGGCGTGGTACAGAAGTTTCAACAT  
TAGGTGGGAGTCCAGGACATTCACCACCGCATTCACCACACGCAAATGGAAATGCTGGCACTAACATAGTAGTAGCAGCA  
GAAACACAAATGACTCAACAGAACGCTGCCGCTATAGCCACCAACGCCGATCATAATCAAACCAGCAGTATGAAAACAT  
TGACCTTCTAAGTGGGCCTTGA

>LaMLO8 AOCW0114634

ATGCTAAGTCAAAGTTGAAAAAATGTTATTTTTATGTTCTGTTTTCAATGCTGGTCTGGTTTGGAAAGTTATGGTATGGC  
GGCAAGTGAAGTAGTGGTAATTCGAGAGAGCTTGTATCAGACACCAACTTGGGCTGTTGCTGCTGTGTGCACTGTTTTTA  
TCTTGGTTTTCCATTACTTTGGAGAAGAGTCTTCAATAACTTGGAACTGGCTAGGACATAGGCAAAAGATGGCTCTGTTT



GAAGCACTAGAAAAGGTTAAGGCTGAGCTTATGATTTTAGGTTTCATTTCACTGCTTTTGACTTTTCGGGCAGAGTTACAT  
AGTCAAAATATGCATTAGTGCAGTGTGCGGATAAAATGCTGCCATGTCCATATAGAGAAAAAGGCACCAACAATGCAT  
CAAGTAGTGGAGGGGAACACCGTAGGAACTTTTTCTTATGAACGTAGATATTTAGCTGCTGATGTACCTCGTACAAA  
TGCAGCGACGAGGGACATGTGCCACTTCTATCTGTGAATGGATTGCACCAGTTACACATCCTCATATTTCTTTAGCAAT  
CATTCATGTGCTTTACAGTGTCTGTCAAAATGCTTCTTGGGAGGCTAAAGATACGTGGCTGGAAGGCATGGGAGGAGGAGA  
CTTCAACTCATGGGTATGAGTTATCCATGTCTTCAAGATTCAAGCTTACTCATGAAACATCATTTTGTGAGAGCCCAT  
GCAAGTTTTTGGACGAAGATTTCAATCTTATCTATATTTGGCTGCTTCTTTAGGCAGTTCTATAGTTCTGTGGGCAAGGT  
TGATTTCCAAACTTTGCGCAATGGGTTTATCGCTGTCCACTTAGCCCCTGGAAGTAAATTTAACTTCCGAAAGTACATCA  
AAAGATCCTTGGAAAGATGACTTCAAGGTAGTTGTGCGAGTCAGTCCGTACTCTGGGCATCAGTTGTAGTTTTCTGCTC  
CTAAATGTTAATGGATGGCAAACCTCGAATTTGGGCAGCCTTAATTCCTGTGTATAATTTTGGCTGTTGGAACAGA  
TCAAGTCATATTGACAAAGATGGCTCTTGAATCACAGAGAGACATGCAGTTGTTCAAGGGATTCTCTTGTTCAGCCT  
CGGACAGATACTTTTGGTTTTGGTTCAGCCTCAATTAGTTCTCCATCTTATCCATTTTGTCTTGTTCAGATTGCATTCCAA  
ATAACATATATCTTGTGGACATGGTACTCATTTGGGCTAACAACTGTTTCCGTATTGACTACAAGCTTGCAGTTGTTGA  
ATTAGCTTTAGGGGTCAATTATGCTATGCCCTCTGCAGCTACAGTACCCTTCCATTATATGCTCTTGTACTCAGATGGGTT  
CAAGTTTGA AAAAATCAATATTTGATGAACATACAGCCAAAGCATTAAAGGAAATGGCACATGACAGTAAAAAAGAAGCAG  
GGAGTAGTAAAGCTAGGAAAATCCACCATGCGAGCCATGGACATGGATGGAAGCACCACCATTGGTTCAACAAAACCTGCA  
TTCTTCTCGACCCACACTTACCCTTTAAAAACTACTGGCCATTCAACTCACACATCAATATATGAGGATGAAGATGAAT  
ATCAATCTGATATTTCAATTGTCTCCAACATCATCGTCAACGACCTTGGTTGTAATGTGGATAATGGTCATCAGCAACAA  
GTAGAAGAAAATACTGAAGAAACCAACATTTCAAGGTGACTTCTCATTTGTCAAGCCTAGCCCTATAGAAAAGAACCATGA  
CGTAGAATTATTATAA

>LaMLO9 AOCW01154130

ATGTCTGTCTCAAAGTACAAAAAGCTATGTTTTTGTGTGGTTTCTTGGTTCTGTTATGAAGTTGGTTTTGGTTATGGGTTT  
TTCAAATGAGAAGGGTAGTGGAAAGTTCTAGAGAACCTTGATCATACACCAACATGGGCTGTTGCATTTGTTTGCAGTGT  
TCATCTTAATATCCATAACTATGGAGAAGAGTCTTCAAAAAGTTGGAATGTGGCTCCAACAAAGGCACAAGAAGTCTCTC  
CTTGAAGCTCTAGAAAAAGTCAAAGCTGAGCTGATGATTCTTGGTTTTCACTGCTTTTGACATTCGGGCAGAGATA  
CATTTGTTAGAATATGTATTCGGCCAAAGTTGCTAACAACTGTTGCCATGTCCACTCAAAGACAAACATCGCACGAAAC  
TAGTCTCTTATGAACACAGATATTTATCAGAAGATACTACCTCTCTCCGATGCAAGGGGAGATACGTGCCTCTTCTATCT  
GTCACCTGGATTGCACCAGTTACACCTTCTTCTATTTCTTCTTAGCAATCCTTCATGTTCTTTACAGTGTGTGACAATGCT  
TCTCGGGAGGTTAAAGATACGTGGATGGAAGGCATGGGAGGAGGAGATTGCATCTGATAGGTTTGGTTTTGACAATGATC  
GCTCAAGTTCCAGTTTACTCATGATACGCCATTTGTGAGAGCTCATGCCACTTTTTGGACACGATATTCAGTCTTCTTT  
TATATCGGCTGCTTCTTTAGACAGTTCTATAGGCTGTGTGCGTAAGGCCGATTACGTGACTTTGCGCAATGGATTTATCAC  
TGTCACCTTGTCTTGGCAGTAAATTTAACTTCCAAAAGTATATCAAAGATCCTTGGAGGATGACTTCAAGCTAGTTG  
TCGGAATCAGTCCGTCTTGGGCATCGTTTTGTTGTTTTCTGCTCCTAAATTTAATGGATTGCAAGCTATGATTGG  
GCATCCTTAATTCCTCTTATTATAATTTTGGTAGTCGGAACAAAACCTTCAAGCCACATTGGCAAATATGGCTATTGAAAT  
CACAGATAGACATGCAGTTGTTCAAGGGATGCCCTTGTTCAGGGCTCGGATAAAATATTTTGGTTTTGGTTCGGCCGCAAT  
TAATCTTTCATCTTATCCACTTTGCCCTTGTTCAGAACGCGATCCAAATAACGCATATCTTGTGGATACGGTATTCTTTT  
GGGAAGGAAACCTGTGTCCATGCAGGCGACATACTTGCAATAGTGAAAGTAGCTTTAGGGGTTGTGGTCTTATGCCTTTG  
CAGCTATATCACTCTTCCATTGTATGCTCTAGTAACCTAGATGGGATCAACGATGAAAAAGTCGATATTCGATGAACAAA  
CAAAGAAAGCCTTAAAGAAATGGCTCATGGATGCGAAAAAGAATAAAGGATCGAAAGCTGGAAAATCCACTGTGAGAACT  
GCAGATGGAAGCACCAATGGTTCTACAATACATTTCACTGGACCTACACTACACCGATTCAAACCTCGGGTCACTCAAC  
TCGAACTCGAACTATATACCCGATTATAACCAAGATGATCACCATTCTGATATCGAAATGTCTCCGATGTTACCAACAT  
CAAGTTTAAATTTAGAGTGGATCATGGTGACCAAGAAGCAAAAAGAAAATGAACACCAAGTGTAG

>LaMLO10 AOCW01039454\_AOCW01039455

ATGTCTAACTCAAACCTCAAAAAAATGTTTTTATTTTTTCTGTTTTCAATGCCAATCTGGTTTTGGAAATTTCTGGTATGGC  
TGCAAGTGAAGGTAGCAATGATTCAAGGGATCTTGATCAGACACCAACTTGGGCTGTTGCAGCTGTGTCCACAGTTTTTA  
TATTGATATCCATTACCTTGGAGAAGAGTCTTCAAAAATTTGGAACATGGCTAGGACATAAGCAAAAAATGGCTCTGCTC  
GAAGCACTAGAGAAGGTCAAAGCTGAGCTAATGATTTTAGGTTTCATTTCACTGCTTTTAACTTTTCGGGCAAAGTTACAT  
TGTCAGAATATGTATTCATGCAAATGTTGCGGCCAAAATGTTGCCATGTCCATATAGAGATCAAACACCGACAATGAAT  
TTGGTAATGAAGAGGAACATCGTAGGAAAGTTCTGTCTTACCAACGTAGATATTTAGCTGCCGACACTACCTCCTACAAA  
TGCACCAACGAGGGACATGTTCCACTTCTATCTGTGAATGGATTGCACCAATTACACATCCTCATATTTTTCTTAGCAAT  
CATTCATGTGCTTTACAGTGTCTGTCAAAATGCTTTTGGGGAGACTAAAGATACGTGGATGGTTTTCATCAATGTTACTTTG  
AAATAGTGTATATGAGACATTTGAGAGATACTTCAAGATTTAGGCTTACTCATGAAACATCATGTGGGAAAGCCCATGCC  
AGTTGTTGGACAAGGAGTTCAATGTTCTTCTATATTTGGCTGCTTCTTTAGGCAGTTCTATAGGCTGTGTGGGTAAGGTTGA  
TTTCCAAACTTTGCGCAACGGGTTTCAATCGCTGTCCACTTAGTCTGGAAGTAAATTTAACTTCCAAAAGTACATCAAAA  
GATCATTTGGAAGATGACTTCAAGGTAGTTGTGGGAGTCACTCTGTCCATTTGGGATCAGTTGTAGTTTCTGCTCCTA  
AATGTTAACGGATGCAAACTCGGCTTTGGGCAACCTTAATTCCTGTTGCTATAATTTTGGCTTTGGAACAAAACCTTCA  
AGCCATATTTGACAAAGATGGCTCTTGAATCACGGAGAGACACGCGGTTGTTCAAGGGATACCTCTTGTTCAGCCCTCAG  
ACAGATACTTTTTGGTTTTGGTTCAGCCTCAATTAGTTCTTCACTTTATCCATTTTGTCTGTTCCAGATTGCTTTCCAAATA  
ACATATATCTTGTGGACATGGTATTCTTTTGGGCTTAGAAAATGTTTTCGTGTAGACTACAAGCTTGCAGTTCTTGAAGT  
AGCTTTAGGGATCATTTATGGTATGCCCTCTGCAGCTACATTTACCCTTCCATTATATGCTCTTGTAAACACAGATGGGTTCAA  
GTTTGA AAAAATCAATATTTGATGAACAAACATCGAAGGCATTAAAGAAATGGCACATGACAGTAAAAAAGAAGCATGGA  
AAAGTGAAGCTAGGAAAATCCACCGTGCAGCATGGACATGGATGGAAGCACCATTGGTTCAACAAACATTGCACCTCTTC

TGGACCCACACTTCACCGTTTTCAAAACTATTGGCCACTCAACTCGCACATCAACATATGAGGATGAGGATGAGGATGAGT  
ATCAGTCTGATATTGAATTTTCTCCCATATCAACATCAATGAACTTGATAGTAAAAGTAGATCATGGTCATGAGCAACAA  
GGAGAAGAAAATAGGGAAGAAGCAAACATAGAAGGCGAGAAAAGAACCATGACATAG

>LaMLO11 AOCW01135152

ATGTCTATGTCTATGTACAAAAAGGTTTTCATTTTTGTGTTGTTTTTTGGTTATGTTATGGAATATTAGGAATGGGTTCTTC  
AAGTGAGAGTAGTAACAGTTCAAGAGAACCTTGATCAGACTCCAACCTGGGCTGTGGCTTGTGTTGCACTGTTTTTCATCT  
TGATTTCCATAACTATGGAGAAGAGTCTTACAAAAGTTGGATTGTGGCTCCAACAAAGGCAGAAGAAGGCACTGCTTGAA  
GCTCTTGAAAAAGTGAAAGCTGAGCTGATGATTCTAGGCCTCATTTCACTGCTTCTGACTTTTCGGACAAAGCTACATTGT  
TAGAATATGCATTGGGGCCAACATTGCAGAGAAAACGTGTACCTTGTCCATATAAATTCGGAAGGTATCGGAAATGAATCAA  
GTAGCAAAGATGAACATCGTAGGAAAACCTCTCTTATGAACACAGATATTTATCAGAAGATACTACCTCTTACCATTGC  
AAGGAGGGACATGTGCCACTTCTATCTGCCAATGGATTGCACCAGTTACACATTCTCATATTCTTCTTAGCAATTTTTCA  
TGTTCTTTACAGTGTCTGCACAATGCTTCTTGGGAGATTAAAGATACGTGGATGGAAAGCATGGGAGGAGGAGACTTCAT  
CTCATGGGTTTGAGTTCCGCCACCGACCTTCAAGATTCCGGCTTACTCATGAAACATCATTGTGAGAGCTCATGCCACT  
TTTTGGACAAGATATTCAATCTTCTTCTATGTTGGCTGCTTCTTTAGACAGTTCTATAGGTCTGTGCGTAAGGCTGACTA  
CCAGACTTTGCGCAATGGATTTATCGCTGTCCACCTGGCTCCGGGAAGTAAATTTAACTTCCAAAAGTATATCAAAAAGAT  
CCTTGGAGGATGACTTCAAGATAGTTGTAGGAGTCAGTCTGTCCCTTGGGCATCGGTCGTTGTTTTCTGCTCTTAAAC  
GTTAACGGTTGGCATGCTATGATTTGGGCGTCTTAATTCTGTTGTTATAATTTTTGGTTGTTGGAAACAATACTTCAAGC  
CACATTGGCAAATATGGCTATTGAAATCACAGAAAGGCATGCAGTTGTTCAAGGGATACCTCTTGTTCAGGGCTCCGATA  
AATATTTTTGGTTCCGTCGTCGCGAGTTAGTTCTTATCTTATTCATTGTCCTTGTTCAGAAATGCATTCCAAATAACA  
TATTTCTTGTGGATATGGTATTTCTTTTGGGCTGAAAAACTGTTTCCATGCAGATTATGAGCTTGCAATAATAAAGTAGC  
ATTAGGTTCCGTGGTCCATGCCCTTGCAGCTACACTCCTTCCATTGTATGCTCTAGTAACCTCAGATGGGATCAAGAA  
TGAAAAAATCGATATTCGATGAACAAAACAGCCAAAGCATAAAGAAATGGCACATGGCTGCGAAAATGAAGCACGGACT  
AAGCTAGGAAAGTCCAGCGTGCAGCCGAGATGGAAGCACGACGGTTGGTTCTACAATACTCGTCTGGACCCACACT  
ACACCGTTACAAAACCTACTGGTCACTCAACTCGCACCTTGTCAAGCTATCACGATCAAGATGATTACCATTCCGATATCG  
AAATGTCTCCCGTCTCACGAACATCAAGTTATATGTGAGAATGGATGATGGTGAGCAAGAAGCCGAAGAAAATGAACAC  
CTCCATGTAGGCGAAACCAACCATGGAGATGATGGCTTGACAAATGTCAAGCCTGCTCCCTTATGA

>LaMLO12 AOCW01152069

ATGGGAGATGTGCATGAGGCAGGTAGGTCTCTAGCTGAGACACCTACATATTCAGTTGCTTCAGTTATTACTGTCTATGGT  
CTTCTCTCTCTTCTTAGTTGAACGATCTATCTACCGCTTTGGAAAGTGGTTGAAGAAGACAAGAAGGAAGGCACTTTTTG  
CTTCACTTGCCAAAATTAAGGAAGAGCTCATGCTGCTTGGCCTTATCTCCTTGTCTTGGCACAAAGTGAAGGTGGATT  
TCTGAAATTTGTGTAGATTCCCTCACTTTTCACTAGTCAATTTTATACCTGCTCTCAACAAGAAATAAGTGCCACCAATCA  
CAAAATCATGCTTCAAACCTTCTCCCCCTTCCCTCCAAGTGAATCAACTACTGTTGCAAAGGAAGTAAATAATGTTGCAT  
TTCATCAATGTAGAGAGGGGCATGAACCATTTGTTTCATATGAGGGTCTTGAGCAGCTGCATCGGTTCTTATTTGTTCTT  
GGCATCACTCATGTTCTCTACAGTTGTCTCGCAGTTGGCTTAGCAATGAGCAAGATCTATAGTTGGCGCAAATGGGAAAA  
CCAAGCTACCATGGCAGCCGATGGAAATCTGCAAGCAAAGAAAATCAAAGTATGAGGCGGCAGATAACCTTTATTTCTC  
ATCAAACCTTCTCATCTTGGAGCAGAAGCAGGAATCCCTTACTAATCTGGATGCTTTGTTTTCTACGTCAAGTTAGGAGT  
TCTATACAAAAATCCGATTACCTCGCACTCCGCTTGGTTTCACTGAACACAAATGGCCCTGTATATAAATTTTCA  
TAATTATATGGTTTCGTAGCATGGAAGACGAATTTCAAGCCATTTAGGAATAAGCTGGCCGCTTTGGATTTATGCTATAG  
TCTGCATCTTTGTGAATATCCATGGAATGAACATATACTTGGCTCTCATTATCCCTGCAGTGGTTGTCTGTTAATA  
GGACAAAACCTTCAAACATGTTGTATCAACTTTAGCAATTGAAATATTGGAGCAAACAGGTCCATATGCTAGGACACAAGT  
AAAGCCACGTGACGATCTGTTTTGGTTCAAAAAACCAGATATACTGTATGGCTCATAACAATTTGTGATGTTTCAAGATG  
CCTTTGAAATGGCAAGTTTTCTTTGGACATTGTGGGGTTTCAAAGAACAATCATGCTTTCATGAGAAATCATTACATGATC  
ATCATTCGGTTGACTTCTGGTGTCTTGTTCAGTTCTGGTGTAGCTACATGACAGTGCCCTCAATGTAATTTGTTTCTCA  
GATGGGATCCCGTTGTAAGAAGGCGTTGGTGGCGGAGAGTGTAGAGAGTCAATGCATAGTTGGTGCAAGAGAGTGAAAC  
AGAAGTCCAAGCATGATTTCTTGCATACAGCTAGATCAGTGTGTTCTATTGAATCAACAATTTGATGAGATAACAGTAGTA  
TCTGGTACTTTAACTAGAAGCTCTTCCCTTAGAGTATATGAATCAGTTAACAGTAACTTCACTAGACCAGCTCAACTTTCA  
CACTTGTGATAACAACAATCAAGATTCAATCCATGTTGCCAATGGAGAGGAACAAAATGTTTCAAGACTCCTTCAATTTAT  
TTCAGAAGACATGA

>LaMLO13 AOCW01152789

ATGGGTGGTGGTGGTGGTGAAGATACGACTTTGGAGTTCACTCCGACGTGGGTAGTGGCTGGCATATGCACAGTGATCGT  
GGCCATTTCCCTAGCAGCGGAGCGTGTCTTCAATATTGCGGTTTGTTCCTAAAAAGGAAGAATCAGAAGCCTCTTTATG  
AAGCTCTCCAGAAGATCAAAGAAGAACTCATGCTGCTGGGTTTTATATCCCTACTATTGACGGTCACACAAAACAGCATC  
ACCAAAATCTGCGTTCCATCTGCTTTCACTCATCATATGCTCCCTTGCACTTTCCAATCTCATTACAAAACCCATTTCTCA  
TTCTCAAACCATCTTCTCTTCTTCCCTCCATTTTCTAGGCGCTTCTTTCTCATGCCGATGCCAATTTCTGCTCTCAAGG  
ACAAGTACCTTTGCTATCTCTGGAAGCAATAACATCACCTTACATCTTTATCTTTGTCTCCTAGCTATGTTCCATGTCACC  
TTCTCTGTTCTCAACCGTCTTTTTTGGAGGAACAAAATACGTGAGTGGAAAGCACTGGGAAGATTCAATAGCACAAACAGAA  
CTACGAAAACAAATCGAGTTCTGAAGCCAAAGGTGACAAATGTTCAACAACATGATTTTATCAAGGGTCGTTTTTCTGGTT  
TCGGCAAAGATTCTGCTTTAATGGGTTGGTTGCTATCTTTTTTCAAGCAATTTTATGGATCTGTGACAAAATCAGATTAT  
GTGACATTACGACTTGGCTTCAATATGACCCATTGCAGGGGAAATCCTAAGTTTAAATTTTCAACAAGTACATGATTTCGTGC  
CCTCGAAGATGATTTTCAAGACAAGTTGTTGGGATAAGTTGGTATCTTTGGGCTTTTGTGGTCTCTTCTTGTGCTTAAATA  
TCAACGGTTGGCACACATATTTCTGGATTGCTTTTCAATCTTTCTTTCTGTTACTTGTGTTGGCACTAAGCTGGAGCAT

GTAATAACCCAAATTGGCTCATGAAGTAGCTGAAAAACATGCAGCCATAGAAGGTGAATTAGTTGTTTCGACCATCAAATGA  
CCACTTTTGGTTTTCAGCGGCCCCAGATTGTCCTCTTCTTGATTCACTTCATACTTTTCCAAAATGCTTTTGAGATAGCAT  
TTTCTTCTGGATATGGGTACTTACGGATTGACTCCTGTATAATGGGTCAAGTCCGTTACATTATCCGAGGCTCATT  
ATTGGGCTATTTATTCAGGTACTATGTAGCTACAGCACCCTGCCACTCTATGCGATTGTTACACAGATGGGAACAACTA  
TAAGAAGGCGATATTTGAGGAGCATGTGCAAGTGGGGCTTATTGGTTGGGCACAAAAGGCAAAGATGAAGAAAGAACAGA  
AAGCTGATAGCCAACATGAGTCTGGGCAAGGAAGTCTCATGTAGGAATTCAGCTTGGTCAATTATTTCCCAAAAAGGGCA  
TCTGCACCACAAGACAATACTTTTATCCCACCCAAACCTGATGGATCCACCTGA

>LaMLO14 AOCW01138218

ATGAGTGGTGGGGGTGTGGAAGAAGGAAGTAGTTTGCAGTTTACACCAACATGGGTTGTTGCTTTAGTTTGTAGTGTAAT  
TGTGCTGTTTTCACTTGTGTAGAAGCTTACTTCAATTATGGTGGAAATGTTTCTTAAGAAGAAGAATCAGAAGCCACTTT  
ATGAAGCTCTTCAGAAAATCAAAGAAGAGCTGATGCTGTTGGGTTTTCATATCACTGCTTATGACTGTATCACAAAATTCA  
ATATCCAAAATCTGTGTTTTCAAAGAGTTGGACTGAGCATATGCTTCCATGTAGCCGTGAGGATTTAGAAAAAGAAGGATC  
AAAAACACCAATTTTACATTTTTCAGACATTTTTCTCATTCTCTGGCAATGCTAGGCGCTTACTTTCTGAGGGCCAAGCAG  
CACCTGAGGTCAAATCTGGATATTGCTCAAGTAAGAACCAAGTACCTCTATTATCCATTGAAGCACTGCATCAACTGCAT  
ATCTTTATATTTGTCCTAGCTATAGTTTCACTGTAACCTTCTGTGTTCTAACCATTGTTTTTGGAGGATTAATAATACATGA  
GTGGAAGAATTGGGAAGATTCCATAGCGAAAAGAAAACACGAAACACAGCGAGTTATGAATCCTAAGGTGACTCATGTTT  
AGCAGCATGCTTTTTATCAAGGATCATTTTACGGGTTTTCCGGCAAAGATTCGAGTCTTCTGGGTTGGGTGAAAGCTTTTTTTC  
AAGCAATTTTATGGGTCAGTGACAAAATTAGATTATGTGACATTAAGGCTTGGTTTTATTATGACCCATTGCAGAGGAAA  
TCAAAAAGTTTAAATTTTACAAGTACATGGTTCGTGCCCTTGAAGATGATTTCAAGATAGTTGTTGGTATAAGTTGGTATC  
TTTGGATCTTTGTGGTCCCTCTTCTTGTGCTTAATATCAGTGATTGGCATAACATATTTCTGGATTTTCAATTCGTTCCATTC  
ATCTTCTGCTATCAGTGGGCACAAAAGTTGGAGCATATAATAACCCAAATAGCACATGATGTAGCTGAAAAGCATGCAGC  
CATAGAAGGTGAACTTGTTGTACAACCATCAGATGATCACTTCTGGTTCCATCGTCCCTACATATGTTTCTCTTCTTCTGATT  
ACTTTATCCTTTTTCCAAAATGCTTTTGGATTTGAGATTGCATCTTTTTTCTGGATATGGGTTACATATGGCTTTGACTCTTGTATA  
ATGGGACAAGTCAGTTACATTTTTTCTAGACTCATTATTGGGGTATTTATTCAAGTACTATGTAGTTACAGCACCCTGCC  
ACTGTATGCAATTGTTACACAGATGGGGACTCACTTTAAAAAGGGAATATTTGATGAACAAGTGCAAGCACGCCTTGTG  
GTTGGGCACAAAATGCAAAGAAGAAAGGAGTAAAAGGTGATAGCCAACATGGTGAAGGAAGTTCTCATAGCAATGGTGCT  
GTTGGAGTTCACTAGGGTCAATTTTCAAGAAGCAATCTGCACCAGAAGACAATGCAATTGTCCCAACAAATGAAGAGTC  
CAAGTTAATATAG

>LaMLO15 AOCW01116641

ATGGCAGAAAATGTAGAAGAAACACGGTCGCTGGCCATGACTCCTACATGGTCTGTTGCCACTGTGTTGACTGTCTTTGT  
TGCTGTCTCCTTGTGTTGGAACGCTCCATTACCCGTTTAAAGCAATTGGCTGCGTAAAACATAATCGAAATCCGTTGTTG  
CAGCTTTGGAGAAGATGAAAGAAGAGTTGATGTTGCTTGGATTTATATCACTGCTATTAACGGCTACCTCACGCATGATA  
GCCAATATTTGCATTCATCAAAGTACTACAATAGTGCTTTTGTCTCCATGCCTAGATCTGAGATTAATGAAGAAATGGA  
AGATAATGGCTCCGGAGAACGTAATTTGTTGATCTCTTCGGCCTACCCACACTTACTTAGGAGGATGTTGAATGGCATAA  
ACAGAAGCTCCTGCAAAGAGGGTTCATGAGCCGTTTCTTTCGTACGAAGGTCTAGAGCAGTTGCACCGATTCAATTTTTGTC  
ATGGCCGTAACACATATATCTTACAGTTGCCGTGACAATGCTGTTAGCAATTGTGAAGATTACAGTTGGAGAGTGTGGGA  
GGATGAAGCTCACATGGATCGGCACAATTCGTTAAATATGACTATGCAAAGGCAATCAACATTTGTCAAGTTCCATACAT  
CAAATCCGTTGGCCTCGAACAGTGTCCCTCGTCTGGGTGACATGTTTTTTCCGACAATTTGGGCAATTTGTTGTTCTGTTGCT  
GACTATCTTACGCTTCGCAAAGGCTTATCAGCAATCACAACTCTCAAAGAAATATGATTTTTCATAGCTACATGATTTCG  
ATCCATGGAAGAGGAATTCCAAAGGATAGTTGGTGTGAGTGGCCATCTCTGGGGATTTGTTGTGGCTTTTTCATGCTTTTCA  
ACATCAAAGGATCTAATCTCTATTTCTGGATAGCTGTCAATCCCATATCGCTTGTACTTTTGGTGGGAACAAAGCTACAA  
CATGTTATCGCAACCTTGGCTTTGGAGAATGCTGGAATCACTAGTTTCTTCTCAGAAGCAAAGTTGAAACCTCGTGACGA  
GCTTTTCTGGTTTAAAAAGCCTGAACATTTGCTGTTCTTGTATCCATTTCAATCTCTTCCAGAATGCATTTGAATTGGCTT  
CATTCTTTTGGTTCTGGTGGCAGTTCCGGATATAATTCCTGCTTTATTAGTAATCATCTTCTGGTGTATATAAGGCTAATC  
TTGGGTTTTTGCAGGACAATTTCTTTGCAGCTATAGCACCTTGCCACTTTATGCATTTGTTACACAGATGGGAACAACTT  
TAAGGCTGCAATAATTCACAGAGGATAAGGGAGACAATTCATGGATGGGGTAAGGCAGCTAGGAAAAAGAGAAGACATG  
GCATGTTCCCGACGATTCACAGATTCATACAGACACAAGCACTGTATTGTCCATCGAAGAAGACGATGAATTTATCGAT  
GATACTCCTACAACCTGGCACTGGCACTGGCACTGGAGTAGAATTACAACCAATAACAACCTATTACTTCTTCCCTTTACC  
CGCTGCTGCAAATGAACTTCGAGTAGGGCCGCGACACCCCTGCTTCGACCCTCTGCCTCAATATCTTTATCATCTCCAT  
CTAGCGGAGAGCAGAAGCAGTTGCAAGATGCTTCTCTATGCCAAGTGAAGACATTGA

>MtMLO1 Medtr6g033330

ATGGCTGAAGATAAAGTTTATGAAAGAACTTTGGAAGAAACACCAACTTGGGCTGTTGCAGTTGTGTGTTTTGTGTTGCT  
TGCTATTTCAATCGTAATGAACATATTTATCATGCTATTGGCAAGTGGTTCAAGAAGAAAAACAAAATGCTCTTTATG  
AAGCATTGAAAAAGTCAAAGGAGAGCTTATGTTGATGGGATTTATATCCTTGTCTCTAACTGTGTTCCAAGATTATAT  
TCCAAAATATGCTATCAGAAAAGTTGGATCAACTTGGCATCCTTGTTCCTCCTCAAAAACAAAACATGCATCTAATGA  
TGAAAATTTCTGAGAGTGA AAAACCATGATAGAAAACCTTGGAAATATTTTGTATCCTAACCTTAGGCGAATTTCTGCTACAA  
AAGGATATGATCAATGTGCTGATAAGGGTAAAGTTGCTTTGGTTTTCTGCATATGGAATTCATGAACCTCATATATTCATT  
TTTGTGCTGGCAATATTTCATATTTTACAATGTATAATAACACTAGCTTTGGGAAGATTCAAGATGAGGAGGTGGAAGAA  
ATGGGAGGATGAAACAAGAACCCTTGAATATCAATTTCTATAATGATCCTGAGAGGTTTAGGTTTGAAGGGACACAACAT  
TTGGAAGAAGCACTTGGATGTTGGACCAAGTACCCATTTCAATTATGGATTGTTTGTCTTCTCAGACAATTTCTTTGGA  
TCTATTAGTAGAGTTGATTATTTGGCACTAAGGCATGGATTTATCATGGCACATCTTGCCCCAGGAAATGACGCAGAATT

TGATTTCCAAAAGTATATTAGTAGATCACTTGAAAAGGATTTTAAAGTTGTAGTGGGAATAAGCCCAACTATCTGGTTCT  
TTGCACTGCTATTCTTCTTACAAATACTCATGGGTGGTATTCTTCTTATTGGCTTCCATTTCTCCCACTAATTATAATA  
TTATTAGTAGGAGCTAAGCTACAAATGATCATAACAAAGATGGGACTAAGGATTCAAGATAGAGGAGAAGTAATCAAGGG  
TGCACCTGTGGTTGAGCCAGGAGATCACCTTTTTTGGTTCAATAGTCCCAACCTTCTTCTTTATAAATTCATCTTGTTC  
TCTTTCAGAATGCCTTTCAACTTGCATTTTTTCTTGGAGTACATTAATTTCTTATAAATTTCTTGTCTCCACAGAACA  
ACTGCAGATAAATGTCATTAGAGTCTCAGTAGGGATTTTAAATACATAATTTCTATGTAGCTATGTCACTTTGCTCTTTTGC  
TCTAGTCACACAGATGGGTTCAACCATGAAACCAACCATTTTTTAAATGAAAGATTGGCAACAGCACTCAAGAAATGGCACC  
ACACAGCCAAAAGCAAGTCAAACACAACAAACATTGAAACAACAACACCGTACTCAAGCAGACAATCAACCCCAACA  
CATGGCATGTACCTGTTTCTTCTACATAGACAAACTTTTTGGCAACAGTGACAGTTTACAAACTTCTCCAAGGACTTC  
TAACTATGAAAATGAGCAATGGGATGTTGAAGGAGGAGGATCAACTTCACCAAGAAAACAACCAACAGTAGCATCTGAGA  
TTGAGATACCAATTTGTCGAGTCAATTTTCGACAACCTGAATTGCCGGTTAGCGTTAGACATGAAATCGGCACAACCTCAAGT  
TCAAAAAGATTTTTCTTTTCGAGAAGCGACACATCGGTAGCAATTA

>MtMLO2 Medtr5g022400

ATGGTGGAAAGAAAATAGAGAAGAAGGTAGATCCTTAGCCGAGACCCCTACTTGGGCTGTTGCAACTGTCATCACTCTTTT  
GGTTTCTCTTAGTTTCTTGTCTAATGGCACATTGAAAAAATTGGTTAAGTGGTTGGGTAGAACTAAGAGAAAATCCCTTC  
TCTCCGCTTTGGAAAAATGCAAGAAGAATTGATGCTTTTTGGACTTCTGTCAATTGCTGATGGGCCATTGGATTATTTTT  
GTGGCAAAGATTTGTGTCAAGTCATCAGTATTAAGCAGCAGATTTTTTCCATGTGCACTGAAAGAGAGTTTTTGAATTGT  
TAAACATAATGTGTGGTCCAATTTAGAATATTTCAAATAAAACAATTTCTCAAAGAGCAAGTGAACAATGATGGTCTGCATA  
ATTTCTGTCCTAAGGGTCATGAATCATTGTCTTATGAAAGTCTTGAGCAGCTTCATCGCTTTGTGTTTGTCTTGGG  
ATCACTCATGTTTCCATAGCTTTGTGTCTGTTGCACTAGCCATGATCAAGATATATAGCTGGGAAACTTGGGAAAATGA  
AGCAAAGACTATGGCTATACAAAGCTTACAAGTACTTCAAAAGTACTTCAACTTCAAGCATAAGACTGAAGCGGCTTA  
GTACATTCATTTTTCCAAAGCATCTCATCCTTGGAGTCAACAAAATTTCTTGTGGCTGCTATGTTTTCAGTCCGCAA  
TTCTGGAGTTCCATCAGTCGACTGATTACATGGCATGCGCTTAGGCTTACTTACTACTCATGACCTTCTCTAACATA  
CGATTTCCACAACCTACATGCTTGAAGCATGGACGAGGAATTCGCTGACATCGTAGGTGTTAGTGTGCTTCTCTGGATAT  
ATGCCATATGCTGTATTTTTCTAAATTTTTCATGGAAACAACTTTTACTTTTTGGCTTTTCTTTGTCCCGCAATTTTTGATC  
CTCATAATCGGTACTAAATTTGCATCGAGTCGTGGTAAAATTTGGCTGTTGAAGTAATAGATCATAGTCCGTATATGAAGCC  
TCATCGGTTTAACTTAAAGAGATGAACTCTTTTGGTTTGGAAAACCAAGGCTTCTATTGAGATTAATACAATTTGATATCCT  
TCTTGAATGCGTTTGAATGTCAACATTTCTTATGGTCCCTGTGGGAAATTTGATGATCCTTCTTGTCTCATGGACAACCGA  
ACATTCATTGCGATCCGCTTATCGTTTGGGGTCGTCTCGCAAGTTTGGTGCAGCTTCATAACTTTTCTCTGTATGTTAT  
CGTCACACAGATGGGATCAAGATTCAAAAAACAGTGATATCTGAGAGTGTAAAGAAATCATTATCTAAATGGCAGAGAA  
GAGTGAAGGAGAAACAAAGTTCCCTTATGAACCTTAAATACATCAACAACAACATCATTGGAGTCTTTACTGCATGGA  
ATGGACAATTCAAATCACTCTGACTTAAATCAGTGAGATTGAGGAAGGAAGTTCTCAGGAATAAAAGATATTTGTCATTC  
TAACTTTGATGATGTGTCAATGATTCAAAGCAATGCAAAAATTTCCAAGTTATGATGAAGATTACCATGACCATTATCATG  
ATGTA AACATGATTTGCCTCCCCCTCCACTGTCTTGA

>MtMLO3 Medtr2g093750

ATGGCAGGAGGAAGCGTTGGAAGAAGCTTAACTGAAACACCTACTTGGGCCGTTGCAGTTGTTTGTCTTTGTTATACTTTTC  
TATTTCTATCTTCATTGAACACATTTTCCACATCATAGAAAAGTGGTTGAAGAAGAAGCATAAAAAGTGCCTTGTATGAGT  
CACTTGA AAAAGATCAAATCAGAGCTAATGTTACTAGGGTTCAATCATTGCTCCTAACAGTAGGAGAAGGTTAATATCA  
AGAAATATGTATATCAGAAAAAGTTGCAGCCACATGGCATCCATGTAGCAACAATGCAAATATTGAATCAGATGATGAAGA  
GTTAATAGACCATGAAACCGGTGGCAGCCGAGATTACTAGCCGCGTTGCTTGTCTTCAAGGCGACAATCACCACCGTA  
TTTTGGCTGGTGGAGGAGGTGACAAATGTGCAGAAGAGGGAAAAGTAGCATTGTTATCAGCAGGGGCCATTCACTCAACTC  
CATATATTTATATTTGTGCTTGTGTTTTTTCATATCCTCTACTGCATACTTACTCTGGCTCTAGGTAGAGCAAAGATGAG  
AAGGTGGAAAAGATGGGAAGAGGCAACCAAGACACCTGAGTACCAATTTTACACGATCCTGAAAGATTGAGATTGCGTA  
ACGAGACTTCGTTTGGAAAGAAGACACTTAAAGTTTCTGGACCAAAAATCCTGCTCCTCATTGATTGTTATGTTTTTTTAGG  
CAATTTGTAAGGTCAGTTCCGTAAGTGGATTACTTGACCTTAAAGGCATGGATTTATGATGGCACATTTGGCTCCTCAAAG  
TCACCTGAAGTTTACTTTAGACAATACATCAAAGATGTTTGGAAAGAAGACTTCAAAGTTGTTGTTGGAATCAGTCTC  
CAATTTGGTTCATCACAGTGTCTTCCCTCCTGTTCCATACTCATGGGTGGCACTTATCTATGGCTACCATTTCTTCTCCT  
TTGATTATTGTCTATTAGTTGGAACAAAGCTGCAAGTATCATAACTCAAATGGGTCTTAGAATTCAAAAACAAGGAAT  
GGTGGTAAAGGTTGAGCCAGTGGTGAACCTAGGGATGACCTTTTTGGTTTAAACAACCTAGACTTATTCTCTTCTCTTA  
TTAATTTTGTACTCTTTTCAAGATGCCCTTCCAGCTTGTCTTTTTTTCATGGACTGCTTTCATTTTGGGGTGACATCCTGT  
TACAAATTCACGTAAGATGGTGTGTCATTAGAATTTGCATGGGAGTCTTCGTTCAAATCCTTTGCAGCTACGTCACTCT  
CCCTCTCTATGCTCTCGTGACGCAGATGGGTTTCGACCATGAAACCAACCATATTCAACGAAAGAGTAGCTACAGCTCTAC  
GGAATTTGGCACCACACCGCAAGGAAGAACATAAAGCACAACCGTGGATCGGGCTCTCAAACCCCAATTTTCAAGTCCGGTCC  
ATAACTCCGGCACGTTCAATGTCCTCCGGCCCAATCCTTCTGTCATTACCGCAACCAATGGACACTCCAACAAGACTCAA  
TTTTGAGACCAGTCAACCTATGAATCTTATTCACCTTCACTTCCAACCTCACACCACCACAAGGTTGAGATCAATGTTG  
CTTCTTCCAGCTCAACTCATCTTCAATGAAATGGAAATGGGTACCTAGCCCATGTTGAACAACAAGAAGTCATTAAGCCC  
AATAGTATTTCTGTGGGCTCAGGCCGGCTCAATTTGAAATTTGATATCCAACAGAGTGTGAACCTCTCATTTTTCAACAAT  
GCCCAACAATCAATTAGAATGA

>MtMLO4 Medtr2g028470

ATGGCAGAAGAAGAACTGAACGAGTCTCTTGAATATACACCAACATGGATTGTTGCAGTTGTTTGTCTCCATCATTGTTTT  
CATCTCTCTGTGCGCTGAGCGTGCCCTTACCAGCTTGGAAAGTACTTAAAGAGGAAAAAGCAGAAAGCATTATATAGAG

CCTTGAATAAAATTGCAAGAAGAGTTGATGCTTTTAGGGTTCATTTCCCTTCTCTTAACCGTCTTTCAAGGTGTAATAAGT  
CACATTTGCATCTCACCTGAGCATGCAACCCAAATGCTTCCATGCAAGAGGTCTCATGAATCTGTTCAAGGTTTCAAGACA  
TGATCACATGATACTATAATCAACAGAAGAAGGCTTTTATCCACAGATACTGGTTCGACGACTGTAGGCTAGAGGGGA  
AGGTACCCTGCTATCACTGGAAGGATGTCATCACCTTACATATTCATCTTTGTATTGGCTGTTGTACATGTAGTTTTTC  
TGTGTCAACAATGATTTCTGGAGGTGCAAGGATCCGTCAGTGGAAAAGCTGGGAGGATCATGCTAGGAAGAAGACGAC  
AAATTCGAGTGGTGAACCTTTAGATCAGAGATAGACGAGTCTTCAACAACATGCCAGGGGTATTGGAGAAAAGCAG  
CTGTTGTTGGTGGTTTAGATCATTTCTTCAAACAATTTTATGGCTCAGTTGCAAAATATGACTACCTTGCCTTGCACAT  
GGATTTATCAAGGAACACTACCCGAACGATCCCAATTTTAATTTTCATAGCTACATCACGAGGACACTTGAAGTTGACTT  
CAGAAAAGTTATAGGCATAAGTTGGTACCTGTGGCTCTTTGTTGTGCTTTTTTTGCTGTTGAATCTTGAAGGGTGGCACA  
CTTATTTCTGGTTAGCCTTTTTTACCATTAATAATTTCTACTTCTTGTGGGGCAAAGTTAGAGCACATAATCACTCGATTA  
GGCCAGGAGTCGGTAGCGAAGGAATATCCAACCTGAACGAGTGAAGCCATCAGATGAATACTTTTGGTTTAAACCGCCGGC  
CATTGTCCCTCGACTTACTTCACTTCACTTTGTTTTCAGAACTCTTTTGGATCGCGTTTTTTCTTTTGGATTTGGTCCACAT  
ATGGATTTGATTCATGCATTATGGAGAAAGTAGCCTACATCATCCCAAGAATTGTAATGGGTGTAATTGTTCAAGTGCTT  
TGCAGTTACAGCACCTTGCCCTTTTACACTCTTGTCACTCAGATGGGTAGTAGGGGTAAACTTGACAAGGTTGATGATAA  
GGCGGAAATGGAATCGTCTCCCTTGTTCACAGAATGACCAAAGAATCAAACCAACATTCTCAAATTTGGTGAACAAGCGA  
TTATCATGATGGAAGATCATGCAATATCATCTACAATTTGAACCTCACCCCTATTATTCAATCTCTTTGGAAAAGACCTAA

>MtMLO5 Medtr3g115960

ATGGGAGGAGGAGGAGGAGGCGGTGACTCCAGACAGCTAGATGTGACTCCTACATGGGCTGTGCGCCGGTGTGCGAT  
CATCGTTATCATTTCCATACTCTTAGAGAACTCATAATAAATTCGCATCGGTGTTTGAAGAGAGAAAAGAAGCATGCTC  
TCCTAGAAGCTCTTGAAGAATTAAGCTGAGCTTATGGTTTTGGGATTTATTTCAATTGCTATTAACATTTGGACAAAAC  
TACATATCAAAAGTGTGTATTTCCAGTAAAATATTTCAAATACTATGCTACCATGTCAACCCCTGGCTGAAAGGACAGCTGA  
TCATCCAGGCGAACCCGGCCTTGAAGCTCAAGGGACTGAACACGAGCCTACACCGAACATACCCGGCTGGAGAGGGTGAAT  
CTAAAGGTGAACATCATCGCAGGCTCTTATCATAACGAACTGAGGTTTCTCGGCGGTGGTGGTGGAGGGCCGGGATGTAAA  
CCGGGTTACGCCTCTTATATCAGTGGACGGGTTACATCAGTTACATATTTTCAATTTCTTCTTGGCTGTCTTCCATGT  
GATATTCAGTGCCATTACAATGACACTTGGTAGAGCAAAGATTAAGGTTGGAAAAGAATGGGAGCAAGACCATTTGGTCCG  
ATGAAGATGCCTTGAATGATCCTAGAAGATTCAGGCTTACTCATGAGACATCCTTTGTGAGGGATCACAACAGTTTCTGG  
ACAAAACACCTGTTACTTTCTATTTTGTATGCTTCTTTTCGACAGTTCTTAAGATCGGTTTGAAGGGCAGACTACTTAAC  
AATGCGACATGGATTTGTTTCTGTCCATTTAGCACCTGGAAGTAAGTTTGAATTTCAAAAATATATCAAGAGGTCATTAG  
AAGATGACTTTAAGGTAGTTGTAGGAATCAGTCCAATACTTTGGGCATCAGTGGTGTATTTTGTCTTGTAAATGTCCAC  
GGTTGGCATGCTTCAATTTGGGTGTCTTTTCTTCCACTAGCAGTGATTTCTAGCTGTTGGAACAAAGCTTCAAGCAATTAT  
AACTAGAATGGCACTCGACATAAAGAAAGACATGCAGTAGTGCAGGGGATACCTCTTGTACAAGTCTCTGACAAGTATT  
TTTGGTTTGAATGGCCTCAATTAGTTCTTTATCTCCTCCATTATGTCTCTTTTCAAGATGCATTTGAGCTGACCTTTTTTC  
TGGTGGACATGGTATGAATTTGGGTGGGCATCTTGTCTTTATGAAGATGACAGTCTTATGATTGTTAGAGTTGCTCTTGG  
GGTGGGTGCTCAATTTGTTTGCAGCTATATCACACTTCCCTCTCTATGCACTCGTCACACAGATGGGATCAACGATGAAGC  
GGTCAATATTTGACGAGCAAACATCAAAGGCATTTGCAAAACTGGCGTAAAAATGCAATGCATAAGAAACCATCAAAAAGGA  
CGCTCGAAGGAACTCGAACATTTAGGAGGAGGAGAAGCGGGGTCACCTGTGCATTCCCGTTACATGATGATGGCTCTGA  
AACCGAATTGCAGGAGCATAACACAGCTACTATAGTGACCAGTGTGGATCGTAATGATCACTATGATAACCATGACCTCC  
TAAGTGGACCGTAA

>MtMLO6 Medtr5g024700

ATGTTCAAGAGGTTATTTTCTGTTTGTGCTCTTCTATGGAGGATTATCCATGGCTGCAAGTGATAGTAGGAACAGTTC  
AAGAACACTTGATCAAACACCAACATGGGGTGTGCTGCAGTTTGCACCGTTTTTCATCTTGATATCCATAGCCCTTGAGA  
AGAGTCTTCACAAATTAGGAACGTGGTTAGGAAAAAGAGAAAAGAAGGCTCTGCTTGAAGCTCTAGAGAAGGTCAAGGCT  
GAGTTGATGATTTTAGGATTCATTTCACTGTTATTAACATTTGGACAGAATTACATTGTCAGAATATGTATTTCTGAAAA  
AATTGCAAAACAAAATGCTACCATGTCCACATAAATATATAGGTGGTGATAAGAAATCAAATAGTAAAGTGAACAAAATA  
GGATACCAGTGTCTTTTGAAGGTAGATATTTAGCTGCTGATACTCCCTCCTTCAAATGCAGCAGGAAGGGACATGAACCA  
CTTTTATCTGTGAATGGACTGCATCAGTTACACATCCTCATATTTCTTCCCTAGCAGTCTTTTATGTGTTTTACAGTGTCTGT  
CACAATGCTTCTTGAAGACTCAAGATACGTGGATGGAAGGAATGGGAGGAAGAGACTTTAACTCATGGTTATGAGTTTG  
CGAATGATGCTGCAAACTCAGGCTCACTCATGAAACATCATTTGTTAGAGCTCATAACAAGTTTTTGGACTAGGGTTTAT  
ATTGGCTGTTTCTTTAGACAGTTTTATAGGTCTGTTTCGTAAGGTCGATTACCAGACTTTGCGCAATGGATTTATTAACGT  
CCATCTAGCTCCCGGAAGTAAATTTAATTTCCAAAAGTATATCAAAAAGATCATTAGAAGATGACTTCAAAGTAGTTGTGG  
GAGTAAGTCTGTTCTCTGGGCATCAGCTGTAGTTTTCTTGTCTCTAAACATTTGATGGATGGCGTACTCCAATATGGGCA  
TTCTTGATTTCAAATTAATATAATTTTGGCTGTTGGAACAAAACCTTCAAGTGATATTAGCAAGAATGGCTCTTGAAATCTC  
AGAGAGACATATAGTTGTACAAGGAATGCCCTTGTTCAGGCTCAGATAGATACTTTTGGTTAGGGCAACCTCAATTAG  
TTCTTCACTTATCCATTTTGTCTTTGTTTCAAGATTTCAATTAACATATATCTTGTGGACATGGTATTTCTTTTGGT  
CTGAAAAATGTTTTCCGTTTGGACTATAAGCTTGCCTTATAAAAAGTACTTTTGGGATTTGTATGCTATGCCTTCTGCAG  
CTACATTAACCTTCCCTTATATGCTCTTGTAAACACAGATGGGTTCAAGGATGAAAAAATCAATTTTGTATGAACCAACAT  
CCAAGGCGTTAAAGAAATGGCACATGACTGTGAAAAAGAAGCATGTAAAGCTAGGAAAGTCCACTATAGGAACCATGGAT  
GGTAGCACCATTTGTTGGATCAACAATGCAGTCCCTGGACCAGCACTTCCCGTTTTCAAGACTACTGGCCACTCGACACG  
ATCTTCAACCATTGATGAACAAGATGAATATGAATATCTGATAATGAGTTGATGGAAACTAACTTGAATTGTAAGAGTTG  
ATCATGATGAGCAAGAAGCAGAAGATAGGCATCATCATAGTGAGGGAGAAGCCAATAATGATGATTTCACTTTCTTCAAG  
CATGTCATTAAGAATTTAGTTTTAA

>MtMLO7 Medtr2g006280

ATGGAACATGCTGTGGAGCAAGGTCGTTCTCTAGCTGAGACACCTACATATTCAGTTGCCCTCCGTTGTTACTGTCATGGT  
CTTTGTTTGGCTTCTTGGTTGAGCGTCTATCTACCGTTTTGGAAAGTGGTTGAAGAAGACAAGAAGGAAGGCACTTTTTG  
CTTCTCTGGAGAAAATTAAGAAGAGCTGATGCTGCTTGGGCTTATCTCTTTGTTGTTGGCACAAAGCGCGAGATGGATC  
TCTGAAAATTTGTGTAATTCATCACTTTTCAGCAGTCGATTCATACCTGCTGAACAAGACCTTCCCATGATTGAGCA  
TGTGATGATTGTAAACTTTTCATCTTTCTCTGATGAAACTACTATTCCTAAGGGGCTATATAGTGGTGCACCTCCATCAAT  
GTGGAGAGGGTCATGAACCAATTTGTTTTCATATGAAGGCTTGAACAGCTGCACCGGTTTTTATTTGTTCTCGGGATCACT  
CATGTTCTGTATAGTTGTCTCGCTGTTGGTTTTAGCGATGAGCAAGATCTATAGTTGGTGCAGATGGGAAAATCAGGCTAC  
CATGGCTCTTATTGATGGAAAATTTGCAAGGTAAGAACAACAAGTGATGAGGCGGCAAAACAACCTTTGTTTTCCATCATG  
CATCTCATCCCTGGAGCAGGAATCCTATACTGATATGGATGCTATGTTTTCTGCGTCAGTTTAGGAGTTCTATACAAAAA  
TCAGATTACCTTGCACCTCCGCTTGGTTTTCATCACTGAACATAAATTGCCATTATCATATGATTTTTCATAAATATATGGT  
TAGAAGCATGGAAGACGAATTTTCATGGCATTCTAGGAATAAGCTGGCCGCTTTGGGTTTTATACTATAGTCTGCATCTTTG  
TGAACATCCATGGTCTGAATATATACTTCTGGCTCTCCTTCATCCCTGCAATTCCTGTGATGTTAATAGGTACAAAACCT  
CAACATGTTGTATCCATTTTAGCACCTGAAATCTGGCAGCAGCAGGGTCTTAGTGCCAGAACAAGTAAAGCCGCGCGGA  
TGGTCTTTTTTGGTTCAAAAACCAGATATATTGTTATGGATCATACAGTTTGTGATATTTTCAAGATGCCTTTGAAATGG  
CCTCATTTATATGGACATTTGTGGGGATTTAAAGAAAAATCATGCTTCATGAGACACCATTACATGATCATCATTCGGTTG  
ACATCAGGCGTCTTGTTCAGTTTTGGTGTAGCTATATGACAGTGCCCCCTGAATGTAATAGTTTTACAGATGGGATCGCG  
ATGCAAGAAAGCTCTAGTGACGGAGAGTGTAGAGATTCCTTACACAGTTGGTGTAAAGAGAGTAAAACAGAAGTCTAAGC  
ATGATCATTCGCTGCATTCACATACTGCTAGATCAATATGTTCCCTTAGAATCAACGATCGATGAGAGGGACGAGATAACA  
GTGGTATCCGGCAGCTAACTCGAACAACCTTCCTTAGACTTAGAGTCTTTGAATCAGATAACAGTAACTTCAGTAGACCA  
GCTGAATTTTTCTAACAATCTTCAAGATTCACCGATCTGTCCGAACCCGTACATATTAATTCGCACACTACAACGATGTTA  
TCAACGGAGAGGAGGCTAAAGTTGAGACTCTTCTTGACTTGTTCACAAAACATGA

>MtMLO8 Medtr3g115940

ATGGCCGGAGGAGCTCCTGGGAAAAGAACATTGAAGGAAACACCAACTTGGGCTGTTGCTGCTGTCTGCGCAGTGTTCGT  
CATCATCTCAGTATTAATTGAACATGGAATCCATAAACTTGAAGGTTGTTTTCAAAAAACATAAGAAGGCCATGAGTG  
AAGCCTTGGAGAAAATCAAAGAAGAATTAATGCTGTTAGGATTCATATCCTTGTACTTACATTTGGTACAAAATATATT  
GCAAAGATATGCATCCCTAATAAGTTAGGTGATAGCATGCTTCCATGTAAGAAGGGGAAGTTGAAGAAGAGTCAAAAAGA  
TGATAGGAGAAGGTTACTTTCTTTTGTATTTGATGAGAATGTGGTATGGCGTCGAGGTTTTGGCACCTGCAGCCGGTGGTG  
ATGACTATTGCTCAAATAAAGGTCAAGTGCCTTAAATATCTCAATCTGGGGTGCACCAATTGCATATATTTATATTTGTG  
CTAGCCGTTTTTACATTTTCTACAGTGTGATGACTATAGTCTTAGCTCGAGCAAAAATGCAGAAGTGAAGGCTTGGGA  
AACAGAAACATCATCCGTGGAGTACCAATTTACACATGATCCTTCAAGGTTTCAAGTTTTGCGCATCAAACACTACATTCGTTA  
AGCGTCACTCAGGCTGGTCTGAGAAGCCAGGAATAAGATGGATAGTGGCATTCTTACAGACAATTTTTTGCCTCGGTGAGT  
AAGGTGGATTACATGACTATGCGGCATGGGTTTTATTAACGCACATTTTGTCTCTGATAGCAAATTCGACTTTTATAAATA  
CATCAAAGATCAATGGAGGACGATTTTAAAGTGGTTCGTTGGTATAAGTGTTCCTTTATGGGCTTTTTGCGATCATTTTTT  
TGCTTATGAACGTTTACAATTTGGTACACGCTCACTTGGTTATCATTAGCGCCGCTGGTGATACTTTTATTAGTGGGCACA  
AAGCTTGAACCTGATAATCATGGAATGGCTCAAGAAATCCAAGATCGTACTACAATTTGAAGAGGTGTGCCCGTGGTGA  
GCCAACACAAGTATTTTTGGTTTTAATCGCCCCATTTGGATCATCTTCTTGTATTCAATTTTACCTTATTCCAGAATGCTT  
TCCAAATAGCCTATTTCTTGTGGACTTGGTATGAGTTTACAATCACATCTTGCTTCCATGAGAATTCGCACTAATAGTG  
ACAAGGTTGTCTTGGGGTAGCCTTACAAGTCCATGCGATTACATAACATTTCTCTCTATGCATCTAGTGACACAGAT  
GGGATCTCACATGAAGAGAGGAATATTTGAGGAGCAAAACAACAAGCACTTAAAAAATGGCAAAAGGCAGCAAGAGATA  
AGAGGAAGTTAAGGAATGCAGGATCAATAGAGATTCTTCAAGTGGTGGAGACACAACACCAAGCCAAGGAACATCACCT  
TTGCCTTGTCTTCAAGTTCAAACCTAGTAACCAAAACAGACACAGATAGTGTCTATATTCTCCAAGATCATACCAATC  
TGAAACTGATTTTTTCAAGACACAGAAGGATCTACACACCAATTAATTTGAATCAAATTTATGTCACCACCTCAACACCATC  
CTGCAGGGAACAATCAACAAAATCATAATATTGACTTCTCATTTGATAAGCCTTAA

>MtMLO9 Medtr3g118190

ATGAGTGGTGGAGGTGAAGGAGGAGAAGAAGAAAACACACTTGAGTTTACACCGACGTGGGTAGTTGCCGGTGTATGCAC  
TGTGATTGTTGCCATTTCACTTGGCGTGGAGCGTCTTCTTCACTATGGTGGAAAGTTTCTTAAAAGTAAAGACCAAAAGT  
CACTTTACGAAGCTCTTCAAGAAGATCAAAGAAGAGTTGATGCTTTTTGGGTTTTCAATTTCTTCTTCTTACTGTTTCTCAA  
AATCGTCTTACCAAAATATGTGTTCTCCCGGTGATTGCGTCACATGCTTCCATGTAGTCTTGAGGACAAAAAAGAATC  
ACATTCGCATTCAGCTTTCTCTTTTCTGGTAGAATTGCAAGACGTCTTCTCGCAGATCGCCTCCTTGCAGAATCGGAAT  
CAGCAGAAGAACCCTTAAAACCTGGTTTTCTGCGGTGCGAAGAACAAGGTTCTTTTATTATCTGTGCAAGCTTTGCATCAC  
CTCCACATCTTCAATTTTTGTTCTCGCTGTTGTCCACGTCACCTTCTCCGTTCTCACTGTTGTTTTTGGTGGCGCAAGAAT  
ACGTCAGTGGAAAGCACTGGGAAGACTCTATTTGCAAGGAGAATTATGATACTAACAAAGTTCTCAAACCAAGTTGACTC  
ATGTTCAACAACATGAGTTTATCAAGGGCCGCTTTCTGGTTTTCGGCAAGACTCTGCTCTCATTTGGTTGGTTGCAATCC  
TTTTTCAAGCAATTTTATGGCTCTGTGACAAATCAGATATGTACATTAAGACTTGGTTTCAATTCAGCCACCACTGAA  
GACAAACCCAAAGTTTTAATTTTCAACAAGTACATGATTCGTGCCCTTGAAGATGATTTCAAGCAAGTTGTCGGCATAAGTT  
GGTATCTTTGGCTCTTTTGTGGTCACTTCTTGTGTTTAAATATCAATGGTTGGCATACATATTTCTGGATTGCTTTCTGTT  
CCTGTTATTCTTTTTACTTTTTCCGTGGGAACAAAGCTGGAGCATGTAATAACCAACTAGCTCATGAAGTAGCTGAAAAGCA  
TGCAGCCATAGAAGGTGACTTAGTTGTACAACCATCAGATAATCACTTTTTGGTTTTCATCGGCCTCACATCGTTCTCTTCT  
TGATTCATTTTATCTCTTCCAAAATGCTTTTTGAGATAGCATTTTTTTTTCTGGATATGGGTTACATATGGATTTGACTCC  
TGTATAATGGGACAAGTTCTGTTACATTTGTTCCAAGGCTCGTTATTGGGGTATTTTATTCAGGTACTATGTAGCTACAGCAC  
CCTACCCTCTACGCAGTTGTTACACAGATGGGAAGTCACTTTAAGAGGGCAATATTTAATGACCATGTGCAAGTGGGCA

TTGTTGGCTGGGCAGAGAAGGTAAAAAGAAGAAAGCACTAAAAGCTGATGGCCAGCCTAGCCAAGGAAGTTCTCATATT  
CATGAGGGTAGTACTGGTAGTACTGGAATTCAGCTTGGTTTCAGTTTTCCAGAAGAGGGCATCAGCTCCCGAAGACAC  
TACTTCTGTAACCTAAACCTGAGGGGTCCAACCTGA

>MtMLO10 Medtr8g073130

ATGTTTATGTCTGAAGTACAAGCAAAGGTTGTTTTTATGTCTGGTTTTATTTGCATGGTTGTACAATGGAAGTGTGGCTAT  
GGCGGCTTCAAGTGAAGACAGTGAAGTTCTAAAGACCTTGATAAGACACCAACATGGGCTGTTGGTTGTGTTTTGACTG  
TTTTTCATCTTGGTTTTCTATAATTCCTTGAGAAAAGTCTTCACAAAATTGGAACGTGGCTGGGAGATAGGCACAAGAAGGCT  
TTGCTTGAAGCTTTGGAGAAAAGTCAAAGCTGAATTGATGATTTTTAGGTTTTCTTTCTTTGCTTTTGACGTTTTGGACAGAG  
CTACATGGTTAAATTTATGCATGCCGCAATGCGACAGACATAATGCTGCCATGTCAATCTAGAGCTACCCGCGATGCAA  
AAAATGATGAAGATGAACATCATAGGAACTTCTCTATTATGAGCGCAGATATTTATCAGAAGATGGTGCCCTTACAAC  
TGCAAGGAGGGACAAGAGCCCTTATATCTGTCAATGGATTACACCAGTTACACATCCTCATATTTTTCTTAGCCGTCCT  
TCATGTGATATACAGTGTCTCACAAATGCTTCTCGGGAGACTAAAGATACGAGGATGGAAGGCATGGGAGGCAGAGACTT  
CGTCTCACGGATATGAGTTTTGCCACTGATCCTTCAAGATTCGGTCTTACACATGAAACATCATTGTTAGACAACATGCC  
ACTTTTTGGACTAAAATTCCAATCTTCTTCTATATTAGTTGCTTCTTTAGACAGTTCTATAGGTCTGTGAGAAAATCTGA  
CTACCTGACTCTGCGCAACGGATTTATCGCGGTCCACCTCTCACCGGGAAGTAAATTTAACTTTCAAAAATATATCAAAA  
GATCCTTGGAGGATGACTTCAAGGTGGTTGTTGGAGTCAGTCTGTCTTTGGGCATCATTGCTTGTGTTTTCTTGTCTTA  
AATGTTGATGGATGGCATGCTATGTTTTGGGGATCCTTAATTCCTGTCAATTATAATTTGGCTGTTGGAACAAAACCTTCA  
AGTCACATTTGTCAAAGATGGCCATTGAAATCACAGAAAGACATGCTGTGGTCCAAGGGATTCCCCTTGTTCAGGCTCAG  
ACAAAATTTTTGGTTTTGGGAAGCCTCAGTTGCTTCTTACCTTATCCATTTTGTCTTGTTCAGAATGCGTTTTCAATA  
ACATAATTTCTTGTGGATATGGTATTTCTTTGGGTTTCATAAATTTGTTCCATGCTGATTACAAGCTTGAATAGTCAAAGT  
AGCTTTAGGGCTCGTGGTGTCTAGTCTCTGCAGCTACATCACCCTTCCATTATATGCTCTTGTACTCAGATGGGATCAA  
CAATGAAAAAATCAATATTTGATGACCAAAACATCAAAGGCTTAAAAAATGGCACAATACTGTGAAAAAGAAGCATGGA  
GTGAAACTAGGAAACTCGAGCGTGCAGAACCGGGACGGGAAGCACCACCGATTCAACAGTGCACCTTATTGGTCCCCTCT  
ACACCGTACAAAACCTACCGGTCACTCAACTCGCTACGAAAACGACCAAGATGATTACCAATCTGATATTGAATTGTCTC  
CCACATCACCACATCAAACCTTACTAGCAGTAAGAGTAGATAATCTTGAGCAAGATGCAAAAAGAAAATGAACACCAAGCC  
ATCTTAGAAACCATTGAACAACAACAACCGTTTCTACGTAGCTTGTCAATTTGTCAAGCCTGATCATCCGGAAAGAAGCGC  
GAATTAA

>MtMLO11 Medtr4g079140

ATGGCGGAAGGAGAACAAAGATCTCTTGAAGAAACCCCAACATGGGCTGTCTCAGTTTTGTTGCTTCTTTGTTCTTGTAT  
ATCATTGATCATTGAAGGAGGTCTCCACAAATTTGGCTGAGTTTTTGGAGAAAAGAAAAGAAAATCCATGGGGGAAGGCTT  
TGACCAAACTAAAACAGAAATGATGAACTCGGTTTTCGTGTCAATTTCTTCTGACAATATCGGAAGTGCCAATGTGCGAAA  
ATTTGCATCAACAAGGATGTAGCAAATTCCTTTCAGGCCATGTAAGATTCTGAATACTTAGCAGGTGAAGTTTTCAAGAAA  
AGAATTGGGATACCACGACAACCTATTGTGAAGCAAAGGGCAAGGTAGGGCTAATTTCAAGTGAAGGAATCCTGGAGCTAA  
ATATCTTAATCTCCATTTTGGCAGTCTTTCATATCCTTTACTGCACATTAACGATGTGTCTTGGGAAGGCTAAGATGAGA  
AGATGGAAAAAATGGGAGGAGGAGACTCAAACCTTGAATATCAGATAGACAATGATTCAAGAAGATTCCAGTATATAAG  
TCAAACATTTGGGTGGCAAGCGTCATTTTAAATTTCTGGAATAATTAATTTCTCCCTTGTGTGGATTGTCTGTTTTATGCGGC  
AGTTCTATAATTCAGTCTCAAAGATGATTACTTTGTCTTACGAAATGGGTTTATTGCAAAAAATATTTCTGAAGGCAGC  
AATTTTAAATTTCAACTTCAAGAAATTCCTTTCCCGCACTTATGACGAAGATTTGAGAAGGTTGTTGGAATCAGGTTTTG  
GATCTGGCTTTTTTCCATATTTTTCCATATTTCTTACGCGCACACGAGTTTTATAATTACTACTGGCTTCCATTTATTCCAC  
TTGTGATTGTTCTTCTTTCGCGGGACTAAACTGCAAGTAATAATAACAAGATGCACCTTGATAGTTGCAAGCAAAGCCCT  
GTGATCAAAGGAACCATACTTGTAAAACCAAGTATGAATATTTTTGGTTTTTATAAACCTGAATGGCTTCTCCATTTAAT  
CCAAATCATCTTATCCAGAATCTCTTCAACTTGCATTTTTCACTTGGAGTTGGTATGAATTTGGTCCAAGGTCTTGTCT  
TCAATAGAGAAAAAGAGGACATTGCCATAAGGATTGCATTTGGGTTTAGCTGTTTCCAGCTTCTTTGTGCTTATGTCACTCTA  
CCCCTTTATACACTTGTCACTCAGATGGGGTCTAACATGAGAAAGGAAATTTCACTGAGCATATTACTCAAGGTCTAAA  
AAATTTGGCATAAAAAGGCTAAGCAATCTCTTTCCAAAAGCAACAACAATTCAGTTTTCTTTACATTCAGAACAGTGAGA  
ATTCAGTAAGAAGATCTTTATCTATAGAGAGTATGCAGAATAACAATAAGGTGGAAGATGAAGACATGCAATCAGTAATA  
GTGGTACTAGTCTCTCTCTGGTAACAATTTCTGGAAGTGGAGAAGAGGAAAGAGATTGTTAATGTAGCGAGTGTGAGCA  
AGAGATATCAAGTGAATCAACTTCAAGAAATTAAGAATGTTGAGGAAAATAATGGTAAGATCATCACCAGAGGAATCTATG  
ACGGTGAAGATCTCTTTGGAGTTTTATGTGGGTAGTAGTAGCAGAGGCATAGGGGAAATTTGTTTCAATAGCTGAAGAAGAA  
GATGATGATACTAGTGATCAAAATTA

>MtMLO13 Medtr8g010500

ATGGGTCATGGTGGAGGACAAGTTGAAGAAGGACCCGATTTGCAATATGCTCCTACATGGATTGTTGCCCTTGTGTTGCGAG  
CGTCATCGTCGAGTTTTCAATTCGCCGTGAATGTTCTCTTCAATTTGCTTGGCAACTTTCTTAAAGAAGAAAAACCAAAAAC  
CACTTTATCAAGCCCTACAGAAAATTAAGAAGAGTTGATGCTGTTGGGATTCATTTCTCTATTTCTGACTATAACACAA  
AATGGGATAACA AAAATTTGTGTTTCTTCTGATGAGTGGACTTATCATATGCTTCTTGTAGTCTTGAGGAGATAGAAGAAGA  
AGAGATGAAAAAAAATTCACATTTTTCAGACTTTTTTCTTCTCGGATCTTGTGTTTCTGGCACTGCTCGGCGCCTTCTTGGTG  
CGGTTGGCGGTGGTGTATGATCCATTTCGGATTACGGATGAAAAAGTTGGATACTGCACTGCCAAGGGAAAAGTACCTCTA  
TTATCTGTGGAAGCATTGCATAAACTGCATATCTTTATTTTTGTCTTAGCTATTGTTTTCATGTGACTTCTTGTGTTTTGAC  
TATTATTTTTGGAGGACTAAATATTCGTGATGGAAGCCCTGGGAAAATTTCTATTGTTGCAAGATGAAAACCATGAATCAC  
AACATGCACCCGAATGGACGGATACGGTACTCATGTTTATCAGCATTCTTTTATAAGAATCGTTTTTACTGGTTTTGGC  
AAAAATTTATGCTATAATGGGATGGGTGAAATCAATTTTTCAAGCAATTTTATGGATCAGTGACAAAGTTGGATTATGTGAC

ATTAAGGCGTGGTTTTTCATTATGACTCATTGTAGGGGAAATCCAAAGTTTAATTTTTCACAAGTACATGATCCGTGCACTTG  
AAGATGACTTCCAAAACGTTGTTGGTATTAGTTGGTATCTTTGGATCTTTGTGGTCATATTTATGTTGCTTAATATCAAT  
GGTTGGCACACATACTTTTTGGGTGCTTTTCATTCCCTGTCATTCTACTACTTGTCTGTGGGAACAAAGCTTGAACATGTAAT  
AATTCAATTAGCACATGAAGTGGCTGAGAAGCATTACAGCCATAACAAGGCAAATTAGTTGTTCAACCATCAGATGATCACT  
TCTGGTTTCATCGTCCTCGCATCGTCCCTCTTCTTGATTCAATTTGATCCTTTTCCAAAATCTTTTGAGATAGCATTCTTT  
TTCTGGATACTGGTAAACATTTGGCTTTAATTTACATGGTATGGGAAAACCTTACATTACACTATTTCAAGGCTCGTTATTGG  
GTTATTGATTCAAGTCATATGATAGTTATAGTACCCTACCCTCTATGCAATTGTTCACACAGATGGGAACCTTACTATAAGA  
AAGCCATATTTGATGAGCAAATACAAACATGTCCTTCTGGTTGGGCACAAAAGGCAAAGAAGAAAGGATTAAGAGGTAAT  
AATAACCAATCTGGTGAAGGAAGTACTCACAGTGGTGAAGCAGTAACATTACAGTTAGGATCTGTGTTTGAAGGGCACC  
TGCTCCAGAAGACAACACCATTGTCCCTAAAGATCAACAGTCTGTATGA

>MtMLO14 Medtr8g010530

ATGGGTCATGGTGGAGGAGAAGCTGAAGAAGGAAGAGATTTGCAATTTACACCTACATGGGTTGTTGCTCTTGTGTTGCAC  
TGTCATCGTCGCTGTTTCATTCCGCGTGGAAACGTTCTCTTCATTATCTTTGGCAAGGTTCTTAAGAAGAAAAATCAGAAAC  
CACTCTTTGAAGCCTTACAAAAAATCAAAGAAGAGTTGATGATTTTGGGTTTTATTTCACTGTTTCTAACGGTAACACAA  
AATGGGATGATAAAAAATTTGTGTTCCGGTAGAATGGACTATTTCATATGCTTCCCTGTAGTATTAATGGGGACGATGAAGT  
CAAAGAAACAAAAATTACCATCCAAGTCACATTTTTCAGACTTTTTTCTCTTCCAAGGATGTTTTTGGCACTGCTAAGCGCC  
TTCTAGGTGACGATCACGATCATTTCGTCCAAAGATGAAGAAATTGGATACTGTACTGCCAAGGGAAAGGTGCCTCTATTA  
TCTGTGGAAGCATTGCATAAACTGCATATCTTTATTTTTGTTCTAGCTGTTGTTTCATGTGACTTCATGTGTTTTGACTAT  
GTTTTTTGGAGGATTAATATTCGTCGGTGGAAAGCGCTGGGAAGACTCAATTGTTGCAGATGAAAACAATCAATCACAAA  
CCCCGAAACGGACGGATACGGTGACTCATGTTTCATCAACACGCTTTTATCAAGGATCATTTTACTGGTTTTGGCAAAGAT  
TCTGCCATAATGGGGTGGTTGAAATCATTTTTCAAGCAATTTTATGGATCTGTGACAAAAGTTGGACTATGTGACATTAAG  
GCTTGGTTTTCATTAAGACTCATTTGAGGGAAAATCCGAAGTTTAAATTTTACAAGTACATGAACCGTGCCTTGAAGATG  
ATTTCAAGAAAGTTGTCGATATTAGTTGGTATCTTTGGATCTTTGTGGTCATATTTTTGTTGCTTAATGTCAATGGTTGG  
CACACATATTTTTGATTGCTTTTCATTCCCTGTCATTCTTCTTCTTGTCTGTGGAAACAAAGCTTGAACATGTAATAATTCA  
ATTAGCACATGAAGTAGCTGAAAAGCATTACAGCCATAACAAGGTGAATTAATTGTTCAACCATCCGATGATCACTTCTGGT  
TTCATCGTCCCTCGCATTGTCTCTTCTTGTATTCAATTTGATCCTTTTCCAAAATCTTTTGAGATAGCATTCTTTTTTTGG  
ATATGGATAACAATATGGCTTTAACTCATGTATAATGGGACAAGTCAAGTTCATTTATCCAAGGCTTGTATGGGGGTATT  
TATTCAGTGCATGTAGTTATAGTACCCTACCATTGTATGCAATTGTTACACAGATGGGAACCTCACTTTAAGAGATCCA  
TATTCGACGATCAAGTACAAACACGACTTATTGGTTGGGCACAAAAGGCAAAGAAGAAAGGATTAAGAGGTGATAGCAAC  
CATTCTGTCCAGGAAGTTCTCATAATGGTGAAGTACTAACATTACAGCTAGGGTGCATGTTTCAGAAGAGGACCTGCCCC  
AGAAAACAATGCCTTTGTCCCTAAAAATGATGAGTCTGTTTTGA

>MtMLO15 Medtr2g079500

ATGGCAGAAACTGTAAAAGAACCAAGGTCATTGGCCTTGACTCCTACCTGGTCCGTCGCCACTGTGTTGACCATCTTTGT  
TGCCGTCCTCTTTGCTTGTGGAGCGCTCCATTAATCGTTTAAAGCAATTGGCTGCGGAAAACATAAGAAAACCTTTGCTTG  
AAGCTGTGGAGAAGATGAAAGAAGAGTTGATGTTGCTCGGATTTATATCCCTCCTACTTACTGCTACATCTGGCATGATA  
GCCAATATTTGCATTTCCATCAAAGTTCATAATAGTGCTTTTGTCCGTCCTAGATCTGAGATCAATAAAGAAATCGA  
AGAGAATGGCTCCGAAGGACGTAATTTATGACGGCTCTTATCCACGCTTAATTAGAAGGATGTTGAATGGAATGGATA  
GAACTCCTGCAAAGAGGTTATGAACCATTGTTTCGTACGAAGGCTTAGAGCAGTTACATCGGTTTCAATTTTTGTCATG  
TCGATAACACATGTATCTTACAGTTGCCTAACAATGTTGTTAGCCATTGTGAAGATTACAGTTGGAGAGTGTGGGAGGA  
TGAGGCTCACATGGACCGCGCAATTTATTTATCTGAAATTAAGTAGGCAGATGACTATGCGAAGGCAATCGACTTTTGTCA  
AGACTCATAACATCAAATTCATTATTCAATTTGGATGACATGTTTTTTCCGACAATTTGGGCATTCTGTGGTTTCGTGCTGAC  
TACCTTACACTTCGCAAAGGCTTTCATCACGAATCACAACTTTTCATCAAAATATGATTTCCACAGCTACATGGTTAAATC  
AATGGAAGAGGAATTCCAAAGGATAGTTGGTGTGAGTGGCCACTATGGGGATTTGTTGTGCGTTTTCATGCTTTTCAACA  
TTAAAGGATCAAATCTCTATTTCTGGATAGCTATCATTCCATATATCGCTTGTCTTTTTGGTGGGAACAAAGCTACAGCAA  
GTCATTGCAACCTTAGCATTTGGAGAATGCTGGAATTAGTGGTTTTCTTTTCCGGAAGCTAAGTTGAGGCCTCGCGATGAACT  
TTTCTGGTTTTAAAAGCCTGAACATTTACTGTCCTTAATCCATTTTCAATCTCTTCCAGAATGCTTTTGAATTGGCTTCAT  
TCTTTTGGTTCTGGTGGCAGTTTCTTTGTCAGCTACAGCACCTTGCCACTTTATGCACTCGTTACACAGATGGGAACAAACTATAA  
GGCAGCATTAATTCACAGAGGATAAGGGAAACCATTTCATGGATGGGGTAAAGCAGCTAGGAAGAAGAGAAGACATGGTA  
TGTTCCGCCGACGACTCCACCATTTCATACAGACACAAGCACTGTATTGTCTATTGAAGAAGACTATCAAACAATCGGTGAT  
CCACATAAAGACCTTGTCACTGGCACTGAAGTAGAATTAACAACAGTACCAACTGTTACATCAACCCCTTACCTATTGC  
TAACGAAACTTCAAGTCGGGCGGTTACGCCCCCTCCTTCGACCCCTCAGCTTCAGTATCTTCATCAGTACCATTCAATTCTA  
GACAAGAAGAACCAATTCGAAGATCCTCCTCTATGCCAAGTGAAGATAA

>PsMLO2

ATGAGTGGCGGTGGTGAAGGAGGAGAAGATGAAACAACACTTGAGTTCACTCCCACGTGGGTTGTTGCTGCCGTTTGTAC  
TATAATCGTCGCCATTTCACTCGCTGCTGAACGCTCTCCTTCACTATGGTGGAAAATATCTCAAACGCAAAGATCAAAAAC  
CACTTTACGAAGCTCTCCAGAAAATCAAAGAAGAGTTGATGCTTCTCGGTTTTCAATTTCTTCTTCTCACSGTTTCCCAA  
AACGGACTCACCAAAATATGYGTTCTTCCCGGTGATTGCGTCACATGCTTCCYTGTACTCTYAAGGAGAAGGATCAGAA  
AGAGTCTGAACTTCCCAAATCACATTCGCTTTTCTTTTCCCCGGAATCGCACGGCGTCTTCTCGCCGATCGTCTCCTAG  
CAGAAGCGGAAGCAGCAGAAGAGGCTCATCCGAAAACCTCTTTCTGCTCTAGCAAGAGCAAGGTTTCTTTGTTGTCTCTT  
GAAGCTTTGCATCATCTCCACATCTTCATTTTTGTTCTCGCCGTCGTTTCATGTTACTTTTTTGGTTCTCACCGTTGTTTT



TGGAGGCGCCAGAATACGTCAGTGAAGCGCTGGGAAGATTCTATTCGAAAAGAGAATTATGATACTAGTAAAGTTCTCA  
AACCAAAGTTTACTCAGGTTCAAATCATGAATTTATCAAAGGTCGCTTTTCTGGTTTCGGCAAAGACTCTGCTTTAATT  
GGTTGGTTGCAATCCTTTTTCAAGCAGTTTTATGGTTCTGTGACAAAATCAGACTATGTGACATTAAGACTCGGGTTCAT  
TATGACTCACTGCAAGACAAACCCAAAGTTTGAATTTTACAAGTACATGATCCGTGCCCTTGAAGATGATTTCAAGATAG  
TTGTTGGCATAAGTTGGTATCTTTGGCTCTTTGTGGTCATCTTGTGTTAAATATCAATGGTTGGCATAACATATTTTC  
TGGATTGCTTTTCAATCCAGTTATTTTACTTTTCTGTGGGAACATAAGCTGGAACATGTAATAACCCAACACTAGTATGA  
GGTAGTGAAAAACATGCAGCCATAGAAGGTGACTTTGGTTGTAAAACCATCAGATTGGTCACTTTTGGTTTTCATCGACCCC  
ACATCGTTCTCTTCTGATTACCTTTATCCCTTTCCAGAATGCTTTTGGATAGCATTTTTTTTTCTGGATATGGGTACG  
TATGGATTTGATTCTGTATAATGGGACAAGTTCTGTTACATTGTTCCAAGGCTTGTGATTGGGGTATTTATTCAAGTACT  
GTGTAGCTACAGCACCTTACCACCTATGCAGTTGTACACAGATGGGAACTCACTATAAGAGGGCAATATTTAATGAGC  
ATGTGCAAGTGGGCTTGTGGTTGGGCAGAGAAGGTAAAAAGAAGAAAGCACTAAAAGCTGAAAGCCAAGGAAGTTCT  
CATGATCAAGAGGGTAGTAGTACTAGTGCAGGAATTCAGCTTGGGTGAGTTTTCCAGAAGAAGGCATCAACTCCKGAAGA  
CAATGCGTCGGTTCCCAAAGCTGAGGGGTCCAACCTGA

>PsmLO3

ATGGCCACACAAACAGAACAAGATCTCTTGAAGATACCCCAACATGGGCTGTCTCAATTTGTTGCTTCTTTGTCTTGT  
TATATCTTTGATCATTGAACACGGTCTCCACAAATTCACTGAGGTTCTGAAGAAACAGAAAAGAAAATCTATGGGGAAAG  
CTTTGGCTAAAACATAAATAGAAAATGATGAAATTTGGTTTTGTGTCAATTTTGTGCTGACAATATCGGAAGTTCCAATATC  
AAAAATATGCATCAATAAGGATATGGCAAATTCATTTCTACCATGTAAGATTTCTATGGAGAAGTTAGCAGTATCATCAG  
AATTAGATCAAACACCTTCTACCAATGAGTTGGGAAACCAAGTCAACTATTGTGAAGCTAAGGGAATGGTTAGTCTAATT  
TCAGATGATGGAGTCCACAGCTAAATGTCTTAATCTCAATTTTGGCAGTGTTCATATCCTTTACTGCACATTAACCAT  
GTGCTTGGGATGGCAAAGATGAGAAGATGGAAAAATGGGAGGAAGAGACACAAACACTTGAATATCAGATAGATAATG  
ATCAAGAAGATTCCAGTATATAAGTCAAACATTAGGTGGAAAACGACATTTAAATTTCTGGAATAATTTACTCCCTTG  
CTCTGGATAGTATGTTTTATGCGACAGTTCTATAATTCAGTCTCGAAAGATGATTACTTTGCTCTTCGAAATGGGGTTCAT  
CGCAGCAAACATTTCTGAAGTCAGCAATTTTCAATTTCAACTTTAAGAAATTTCTTTGCGCACTTACGATGAAGATTT  
TGAGAAAATTTGTTGGAATCAGGTTTTGGATCTGGCTTTTCTCCATATTTTTTCAATTTTCTTAGTGCACATGAGTTTTATA  
ATTACTATTGGCTTCCATTTATTCCACTTGTGATTGCTCTACTTGTGGGACTAAAACGCAAGTGATAATAACAAAGATG  
CATCTAGATAGTTGCAAAGAAAGTTCTGTGATCAAAGGAACCATACTTGTAAAACCAAGTGATGAATATTTCTGGTTTTCA  
TCGACCCGAATGGCTTCTCCATTTTACTCCAAATCATCTYATCCAGAACTCCTTTCAACTTGCATTTTTTTCACATGGAC  
TTGGTATGAATTTGGTCCAAGGCTTGTCTCAATAGGGAAATAGAGGACATTGCTATAAGGATTGTATTGGGATTAGCT  
GTTCACTTCTTTGTGCTTATGTCACTCTTCCCTTTATGCACCTGTCACTCAGATGGGGTCTAACATGAGAAAGGAGAT  
TTTCACTGAGCATGTGAATCAAGGCTTAAAAACTGGCATAAAAAGGCTAAGCTGTGCTTTTCGAAAACAGTAACTCGG  
CTTCTTTACATTCAAAACAAGTGAGAATTCAGTAAGGGGGTCAATAGAGGAGTTGCGGAATAATGAAGACATCATAACA  
CCTAATTCAGCCAACAACCTCTGGAAGTGGAGAGGAAAAAGAAGTAATTGTAGCTGCTGTTGAGAAAGMGATACCAAGTGA  
ATCTACTTCAGAAGAGAATGGTAAGATCATCACCAGAGGAATCTATGACGGTGAGATCTCGTTTTGGAATCTATGTGGGAA  
GTAGTAGCAGAGGTATAGGGGAAATTTGTGCTATAGCTGAAGAAGAATAGATGATTACACTCATCAAAATTTGAATCCA  
GAGGGATTGGTCTTGTAGATTGTAATATTTATTTGAATAAAAACCTCATTCGTTAAACAATGTCTATAATCTTTGA

>PsmLO4

ATGGCAGAGAATGGAAGAAACAAGGTCATTGGCCTTGACTCCTACCTGGTCTGTTGCCACTGTGTTGACCATCTTTGT  
TGCTGTTTTCTTTGCTTGTGGAGCGCTCGATTAACCGTTTGGCAATTTGGCTGCGGAAAACATAAGAAAACCTTTGCTTG  
AAGCTTTGGAGAAGATGAAAGAAGAGTTGATGTTGCTCGGATTTATATCTCTCTACTTACTGCTACCTCTGGCATGATA  
GCCAATATTTGCATTCCATCAAAGTTCTATAATAGTGTCTTTGCTCCATGCCTAGATCCGATATCGATAAAGAAATCGA  
AGAGAATGGATCCGAAGGACGTAATTTGTTGACGGCGTCTTCTTTCCCTCGCTTAATTAGAAGGATGTTGAATGGAATCA  
ACAGAAGCTCCTGCAAAGAGGGTTATGAACCATTTGTTTCGTATGAAGGTCTAGAACAGTTGCATCGGTTCAATTTTGTCT  
ATGGCGATAACACATGTATCTTACAGTTGCCTAACAAATGTTATTGGCCATTGTGAAGATTACAGCTGGAGAGTGTGGGA  
GGATGAGGCTCACATGGATCGGCGCAATTTATTTAGCTGATATTACTAGGCAGCTGACTATGCGAAGGCAATCGACCTTTG  
TCAAGCTCATAACATCAAACCCATTAGCTATTTGGATGACATGCTTTTATCGACAATTTGGGCGATCTGTGGTTCTGTGCT  
GACTACCTTACCCTTCGCAAAGGCTTCATCATGAATCACAACCTTTTCAAAAATATGATTTTACAGCTACATGGTTCTG  
ATCTATGGAAGAAGAATTCAAAAGATAGTTGGTGTGAGTGGCCACTCTGGGGATTTGTTGTGCGTTTTCATGCTTTTCA  
ACATTAAGGATCTAATCTATACCTTCTGGATAGCTATCATTCCATATCTCTTGTCTCTTGGTGGGAACAAAGCTACAG  
CAAGTTATTGCAACATTAGCACTGGAGAATGCTGGAATTTGCTGGTTTTCTTCTCAGAAGCTAAGTTGAGGCCTCGCGATGA  
ACTTTTCTGGTTTTAAAAGCCTGAACTATTACTTTCCATAATCCATTTCAATCTCTTCCAGAATGCATTTGAATTTGGCTT  
CATTTCTTTGGTTCTGGTGGCAGTTTGGATATAACTCCTGCTTTATTAGGAATCACCTCCTTGTTTATTTAAGGCTAATC  
TTGGGATTTGCCGGACAGTTTCTTTGACGCTACAGCACCTTGGCACTTTACGCACTCGTTACACAGATGGGAACAAATTA  
TAAGGCAGCATTAATTCACAGAGAATAAGGGAACCAATTCATGGATGGGGTAAAGCAGCTAGGAAGAAGAGAAGACATG  
GTATGTTCCCTGACGACTCCACCTTTCATACGGACAGCAGCACTGTATTGTCTATTGAAGAAGACGATCATCGAATAATC  
GACGATTCCTTCAAGACATTTGCCACTGGCGTTGAAGTAGAATTACAACCAAGTAAACAGCTGTTACGGCCACCCCTTCCCC  
TATTGCTAACGAAACTTCAAGTAGGGGTATTACGCCCTTCTTCCAGCCCTCAGCTTCACTATCTTATCAGTACCATTCA  
GTGCTAGACAAGAACCAGTTTTCAAGATCCTCCTCTATGCCAAATGGAAGATAA

>PvMLO1 Phvul.001G175900

ATGAACATGGCAACAGCACCCGGATATTTCTCTACAACACACTCCAACATGGGCAATCGCCACTGTTTCTTCTTATTCTTAT  
CTCAATCTCAATCATCTTGGAGCATCTCATTCTTATAATCAAATGGTTGAGGAAACACAGGAAGAGCGATTTGGTCTG

AAGCAATAGAGAGGCTTCAATCAGAGTTAATGATCTTAGGATTCATGTGCGCTTTTGTAAACAATAACTCAAGACGCCATA  
ATAGAAATCTGCATTCAGTGAGGGCTGCAGATACTATGCTTCCATGTCGAAAACGTACTACTACCAATGATACTGCAAT  
TTTGGATTCCTGCAGTGCCAAAAATGCCAGTGAGGTTGCTTTAGTGTCAAAACATGGAATCCATCAACTTCACATGTTTA  
TTTTTGTCTGGCTGTGCATGCAAATTTGTGTACAGTTTTCTCACAGTTTTCTCTGGCAAGGGCTAAGATGAAGAACTGGAAA  
GCTTGGGATGAAGAGACTCAAACAATGGAATATGAAATGGCAACGCCCTAATAGATTCAGATACGCAAGGCAAAACAAC  
ATTCGGAAGACGCCACATATCTACTAGTACGGCATCACCAGTGTTTGTTTGGATTAAATGTTTTTTCAGACAGTTCTTTTC  
ATTCAGTAGAAAAAGTTGATTTACCTCACCTCAGGCATGGTTTCATATCAGTCACTTTTTCAGCAAGAAAACAGCAACTTC  
GATTTCCAAGCTTACATTGAACAGTCACTAGAGGAAGATTTTCAAGATCATAGTGAGCATTAGCCCTGTGATGTGGTTTAC  
TGTGTTTATTTTTTGTCTCGTGGATGTACACGGTTGGCACGTATATCTCTGGTTATCCTATGTTCCCTCTTCTGGTTT  
TGGTTGTGGGAGCTAAACTTGAAGTCAATGTGCGATGAAATGGCTCTTTCAGATGAAAGATGTCAACAGTGTAAACAAAGGG  
ACCCACTTGTGTGTTTCCAAGTGACGACTACTTCTGGTTTGGCCATCCAGGATTTGTGTTAAACTTCTACATTACACTTT  
ATTCGTGAATGCATTCGAACTTGCCTTCTTCGTATGGGTATCAACACAGTTTGAATAAAATCTTGTCTACCACGAACACA  
GAACATTTACAATCATAAGGGTGGTGATAGCGGTGGCAGTTCAAGTCTATGCAGCTATGTTACTCTTCCCTCTATGCA  
CTAGTGGCACAGATGGGATCAGAAGTGAAGAGCAAAGCTTTGGCTAAAATCTGAGGCAGTGGCATGTTGAAGTGAAGGGA  
GAGAAGGAGGAAGCAACTAAAACCTTGTGAAGTCTTTTAGTTTTCGCCGCATGAATATGTCCTCAGAATGGAGCCAAGGAA  
ATAAGAGTGCCCTGAATTTCTTCCGAACTACGTGAAAACACTCGTTCCTCTAATGAAGGAGAAATTTGTGGAAGAATTG  
GAACATAGGGTGA AAAACAGAGGCAACCTCGTGAATGATCCACCTAGTGTGTCTAA

>PvMLO2 Phvul.002G107600

ATGGGGAAAAGAAAATGGCGAAGGAAGATCCTTAGCTGAAACCCCCACCTATGCAGTGGCAACTGTGATCGCTGTCTTGT  
TTCTCTTAGTTTCTTGTTCAGGGCACGTTAAAAAAGCTGGTAAAGTGGTTGGACAGAACCAAGAGAAAATCTCTGCTTT  
CTGCTCTGGAAAAGATCAAAGAAGAATTTGATGCTTTTTGGGCTCTATCATTGTTGATGGGTCAATGGATTATTTTTGTG  
GCAAAGATTTGCGTTAAGTCTTCGGTATTAAGCAGCAGATTTTTCCGTGCGCATTTGAAAAGAATTTCTGTGAAAGATGT  
TGTCTGGTTGAGTTAGAATATTTCAAATAGAACAGTTTAAAGGGCAAGTGAATAATGGTTTGAATAATTTGCCCCTG  
AGGGTCGCGAATCATTGGCCCTTATGAAAGTCTTGAGCAGCTTCATCGCTTTGTGTTTGTCTTGGGATAACCCATGTT  
ACCTATAGCTTTCTTGTCTGTTGCCCTGGCCCTTATCAAGATATATAGCTGGAGAACATGGGAAAACGAAGCAAAGACTAT  
TGCTGTACAAAGCATTCAAGATACTTCACAAAGTACATCAAGCATAAGATTGAGGCGGCTTAATACATTATCTTTTACC  
ATACATCCCATCCTTGGAGTCATCACAAAATTTCTGTTTGGCTGCTATGCTTCAGCCGCCAATTTTGGAGTTCCATTAT  
CGAGCTGATTACATGGCATTTGCGCTTAGGCTTCATTACTAACCATGATCTTCCACAACATAACGATTTCCACAACATAT  
GCTTCGAAGCATGGATGAAGAATTTCTGTGACATAGTTGGTGTAGTGTACTTCTCTGGGTATATGCAATCTGCTGTATTT  
TCCTAAAATTTTACGGTAGCAACTTTTACTTTTGGCTTTCTTCTGTTCCAGCAGTTTTGATCCTCATTATTGGTACTAAA  
TTGCATCGAGTGGTAGTAAAGTTGGCTGTTGAAATAATAAATCGTTGCCAGATATGAAACCTAACCAATTTAACTTAAG  
AGATGAGCTCTTTTGGTTTGGAAAGCCCAGGTTCCCTATTACGGTTAATTCAATTGATTTCTTCTTGAATGCATTTGAAA  
TGGCTACATTCCTATGGTCTCTGTGGGAAATTAAGATCCTTCTTGCTTCATGAACAACCGAACCTTTATTGTGATTGCG  
TTGTCATTCGGGGTCATCTCCCAAGTCTGGTGCAGCTTTATAACGTTCCCTCTCTACGTTATCATCACACAGATGGGCTC  
AAGGTTCAAAAAGACCGTGGTCTCTGAAAATGTGAGAAAATCACTCTCTAAATGGCAGAGAAGAGTGAAGGGGAGACAAA  
GCTATTTCTTGCACCTCTTACTGCAACATCACCACATCAATTAGTTCTTTTATCTATGGAAACGATCGTGCCTCAATC  
AGTGAGGAAGGAAGCTCCTCAGGGACTAAAGATATTTGTCTCTTATCTTATGATCATGAGTCAAGGACTCAAGCAAATGC  
ATCATTTCCAAGTTATGAAAATGATCATAATGATCAGGATTTCTCATGATATAATCCATCATTATCTCCCCCTCCACTGT  
CTTGA

>PvMLO3 Phvul.002G117900

ATGAATAGTTTCAAGTTTAGAAAAGCTGCTTTCTTGTGTGGTAGTGGTGTGCTTGGTGGTTATTATGGTCTGGAGGTTT  
GGCCATGGCAGCGAGTGAAAGTGGCAGCAGTTCCAAAGAGCTCGACCAGACACCAACGTGGGCGGTTGCTGTGCTGCA  
CTGTTTTTCAATTTGATATCCATAACACTCGAAAAAGTCTCCACAAAGTTGGGACGTGGCTTGGAAAAAAGCAAAAAGAAG  
GCTTTGCTCGAAGCTCTGGAGAAGGTCAAGGCTGAGTTGATGATTTTGGGTTTCATTTCACTGCTTTTACTTTTGGGCA  
GAGCTACATTTGCAAAAATATGATTTCTGAAAAGATGGCAGACAAAATGTTGCCATGTCCATATAAATAAAGGATGCTG  
AAAAGGCATCAAATGATGATGGAGAGAAACATCGTAGGAAACTTTTGTCTTATGAACGTAGATATTTAGCAGCTGATAGT  
ATCTCGTTTAAATGCAGCAATGAGGGATACGAGCCACTTTTATCCGTGAATGGTTTGCACCAGTTACACATCCTCATATT  
CTTCTTAGCAGTCTTACATGTGCTTTACAGTGCATCACAATGCTTCTTGGAAAGACTAAAGATACGTGGATGGAAGGCAT  
GGGAGGCAGAGACTTCAACTCATAATTATGAGTTCCGCACTGCTGCTTCAAGATTTAGGCTTACTCATGAAACATCGTTC  
GTGAGAGCCCATGCCGATTTATGGACAAGGATTTCCATTTTCTTATATTGGCTGCTTCTTTAGGCAGTTTTATAGGTC  
TGTAATAAAGACGGATTACCTGACTTTGCGGAACGGGTTTATCACTGTACACCTGGCTCCTGGAAGTAAATTTAATTTCC  
AAAAGTATATCAAAGATCATTTGAAGATGACTTCAAGGTGGTTGTAGGAGTCAGTCCATCCTCTGGGCATCAGTTGTA  
GTTTACCTTCTCATCAATGTTAATGGATGGCGTACTACACTTTGGGTATCCGTAATTCCTGTTGTTATAAATTTGGCAGT  
TGGAACAAAACCTCAAGCCATATTTGGCAAAGATGGCTATTTGAAATCACCGAAAGACATGCAGTTGTCCAAGGAATGCCTC  
TTGTCCAAGGCTCAGACAAAATCTTTTGGTTTGGTCAGCCAGTTAGTCTTTCATCTTATCCACTTTGTTGTTCCAG  
AATGCGTTCCAAGTAAACATATCTTGTGGATATGGTATTTCTTTTGGGCTTTAGAAAATGTTTTCCGTAATGATTACAAGCT  
TGCAACAATTAAGTAGCTTTTAGGGATTTGTGATGCTATGCCTCTGCAGCTATATCACTCTTCCATTATATGCTCTTTTAA  
CTCAGATGGGTTCAAGGATGAAGACAGCAATATTTGACGAGCAAAACAAACAGGCTCTGAAGAAATGGCACATGGCTGTG  
AAAAAGAAGCAAAGGGTGGTGAAGCTAGGAAAGTCCAATGCAGAATCAGTATATGGAAGCCCCACTGCTTCAACTTCAAC  
AGTGCACCTTCTGGGCCACACTTACCCTTACAAAACCACTGGTCACTCCACCCGCTCTTCAACGTACGAGGATCAAG  
ATCATGAATATGAGTCCGATGTTGAGTTGTGCGCTGAGTTGTCCAAACAACCAGCTTCATTGTGAGAATGAATCATGCT

GATCACCAACAAC TACAAGA ACATGAAC ACCGCACTGAGGGAGAAA CAACTCTAGTGAAGAATCTGATTTCTCATTTGT  
TAAAGTCAAACCTAGTGACCCCTGTGGAATAACCACCACCCACATGGCATATAA

>PvMLO4 Phvul.003G271300

ATGTCGTCTCAAAGTGC AAAAGACTGTCTCTTTGTCTGGTTTCATGGCTGTGGTTCTGTTGTGTGTCTGTGGCTTCGAG  
TGAGAGTAGTATCGGTTCCAAAGACCTTGATCAGACACCAACATGGGCCGTTGCTTGTGTCTGCACTGTTTTTCATCTTGA  
TATCCTTAACTCTGGAGAAAAGCCCTTCACAAAGTGGGAACGTGGCTACAGGAAAAGCACAAGAAGGCTTTGCTTGAGGCT  
TTGAAAAGGTCAAAGCTGAGTTGATGATTCCTTGGTTTCCTTTCACTGCTTCTGACTTTTCGGGCAGAGTTACATTGTTAG  
AATATGTATTCCTACTGATGTGGCAGACAAATTGTTGCCATGTCCGCTTGTGGTACCGACAGAGAATCAAGTAGTGAAG  
AGGAACACCGTAGGAACTTCTTTCTTATGAACGCAGATATTTGTGAGATGATGCTACCCCTTACCAATGCAAGAAGGGA  
GATCATCAACCCTTATATCTGTCAATGGATTGCACCAGTTACACATCCTCATATTCTTCTTAGCAGTCTTTCATGTGTT  
TTACAGTGCTATAACAATGCTTCTTGGGAGACTAAAGATTGAGGATGGAAGGCATGGGAGGAGGAGACTTCATCTCATG  
GATATGAGTTTGCCAATGATCCCTCAAGATTCCGCTTACACATGAAACATCATTTGTGAGAGCTCATGCTTCTTTCTGG  
ACAAGATATTC AATCTTCTTCTACATAGGATGCTTTTTTAGGCAATTTTATAGGTCTGTGGGGAAGGCTGACTACTTGGC  
TTTGCCTAATGGATTTATCACTGTACACCTTGCTCCTGGAAGTAAATTTAACTTCCAAAAGTATATCAAAGATCCTTGG  
AGGATGACTTCAAGGTTGTTGTTGGAGTCAGTCCCTGTCCCTGGGCTTCATTTGTTGTTTTCTGCTCCTAAATGTTAAT  
GGATGGCATGCTATGTTCTGGGCATCCTTAATTCTGTTGTGATAATTTGGCTGTTGGAACAAAACCTCAAGTCACACT  
GGCAAAGATGGCTATTGAAATAACAGAAAGACATGCAGTTGTCCAAGGGATTCTTCTGTTCAAGGCTCAGACAGATATT  
TTTGGTTTGGTTCGGCTCAGTTAGTTCTTCATCTTATCCATTTGCTTTGTTTCAGAACGCATTCCAAAATAACATATTTT  
TTGTGGATATGGTATTTCTTTTGGGCTGAGAAATTGTTTCCATGCTGACTACAAGCTTGCAATTGTGAAAGTAGCATTAGG  
GCTTGGCTCTATGCCCTGACAGCTATATCACCCTCCATTATATGCTCTTGTACTCAGATGGGCTCAAGAATGAAAA  
AGTCAATATTTGATGAACAAACATCAAAGGCAATAAAGAAATGGCGAATGGCAGTGA AAAATAAGCAGGGAGTGA AACTT  
GAAACTCCAAGGTGCGAGCCATGGATGGAAGCACAACCTGATTCAACAGTACACTCTTCTGGCCCCACACTTCACCGTTT  
CAAACTACTGGTCACTCAACTCGCACCATGTGAGCTATGATGATGACCAAGATTACCATTCTGACATTGAGCTGTCTC  
CCATTTCAACCAACGCAAACCTTGATAGTAAGAGTGGACCATGATGAGCACCAAGCAGAAAAAGCTCAACACCACCCAACA  
CCCAACAATCAAGACCTATCACGTTTTGTCAACCCTGGAACAAGCATGAAATAG

>PvMLO5 Phvul.004G071700

ATGGCAAACGAAGTTTATGAGCGAACTCTGGAGGAAACACCAACATGGGCTGTTGCAGTTGTGTGTTTTTTTGCTTCTTGC  
TGTTC AATCGCCATAGAACATCTTATTCATGGTATTTGGAAGTGGTTCAAGAAGAAACAAAAAATGCTCTTTTCGAAG  
CGTTGGAGAAGGTCAAAGGAGAGCTTATGGTGCTAGGATTCATATCCTTGTCTCTAAGTGTGTTGCAAGATCAAATTTCC  
AAGATCTGCGTATCAGAAGAAGTTGCAGCTTTCGTGGCATCCCTGTGCCAACCCAAAGTCTCAACTGCAACAAAACTGA  
TGAGGATGAATCTGATGACATTCAGATAAAATCTAGGAAACTCCTACAACCTTTATGACTCCATACCAAGGCGTATTCTGG  
CTACAAAAGGTTACGACAAGTGTGCTGAAAAGGGAAAAGTAGCTTTTGTTCAGCCTATGGGATTTCATCAGCTGCATATA  
TTCATCTTTGTGTTAGCAATATTTACATCCTACAGTGCATTATAACACTGGGTTTTGGGAAGAACCAAGATGAGAAAAGTG  
GAGGGCATGGGAAAACGAAACCAAGACCATTTGAATATCAATTTTATAACGATCCGGAGAGGTTTCAGGTTTGC AAGGGACA  
CAACATTTGGAAGAAGACACTTGAATCCATGGAGTCAAGTCAACAATTTTCGTTATGGATAGTTAGTTTCTTCCGACAATTC  
TTTGGATCAGCCACCAAAGTCGACTATTTGACATTACGACATGGATTTCATCACGGCGCATCTGGCACCGGGAAGTATGC  
AAGATTTGATTTCCAAAAGTACATCCAAAGATCACTGGAGAAGGATTTAAAGTTGTTGTGGGAATAAGCCCAGTATGAT  
GGTCTTTTGCTGTGCTATTCCTTCTCACAATACTCATGGGTGGTATTCTTCTTATTGGCTTCCATTCCATTTCTTTGTT  
GTAATCTTATTAGTGGGTGCTAAACTTCAAATGATCATAACAAAGATGGGACTGAGGATTACAGACAGAGGGGAAGTTGT  
CAAAGGTGCACCTCTGGTTGAGCCAGGAGATGACCTGTTCTGTTTCAATCGCCACGTCTCCTCCTCTTCTCATTTCATC  
TTGTGCTTTTTTTCAGAATGCTTTTTCAACTGGCATTTTTTCTCTTGGAGTACTTATGAATCTCCCTAGACTCTTGCTTCCAT  
GAAACAACCTGCAGATGTTGCCATAAGACTTACAATGGGGTTGTATACAAGTTCTATGCAGCTATGTGACATTACCTCT  
ATATGCTCTAGTACACAGATGGGTTCAACCATGAAGCCTACCATCTTCAATCAGAGAGTGGCATCAGCACTGAAGAACT  
GGCACAGCACTGCCAAAAGCAAGTCAAAAACAGCAAGCAAAAACACACCATCTCAAGCAAGCCATCAACCCCAACATAT  
GGTATGCTCC AATGCATCTGTTGCAAAAACACCTTGCTGGTAGAAGTGCAGTGCACAAACATCTCCAAGGACATCAA  
CTATGAAAATGAACAATGGGATGTTGAAGGCTCACCTTCACAAGCAACCATGCAGCAGCTGAAGAACTCAAATGCAAG  
TCATGGAACCAGGCTCAAGCTCAGCACCAGAATTTCTTACCAGCTCTCAGATTGAAATCAGAGTTAGTTTCATCAGAGTTT  
TCCTTTGAGAAGAGACACACTGGTGTCTAGTGAGGAGATATGA

>PvMLO6 Phvul.004G071800

ATGGGTGAAGCCAAAATCCATAAAAGATCACTGGAGGAAACACCAACCTGGGCGTTTGCAGTTGTTTGCTTTATGCTGCT  
TGCTATTTCAATCATCATTTGAGCTTGTATTTCATGCTATTTGGAAGTGGTTAAGAAAGAAACACAAAAGTGGTCTTTATG  
AGTCGTTGGAAAAGGTCAAAGGAGAGCTTATGATGCTAGGGTTCCATCTATGCTCCTAACTGTGTTCCAAGATCCACTT  
TCTAAGATCTGCATATCACA AAAATGCTGCATCAACATGGCATCCTTGTCCAACCCAAAGGCCGTGAGTAATTCTAACGC  
AACATCTCATACCATTGATAGGAAACTTCTCCATTGGACCCCATCCACAGCTGTTCTAGCTGACAAAAGTTATGACA  
AATGTGCAGACAAGGAAAAGTTGCTTTTGTTCAGCATATGGGATTCACCAGCTCCATATATTTCATCTTTGTGTTAGCA  
ATTTTTCATATCATAACAATGCATTGTAACACTAGCTTTGGGAAGAACTAAGATGAGACGCTGGAAGAAGTGGGAAGACGA  
AACAAAAGACAATTGAATACCAATTTCTATAATGATTTCAAGAGTTTCAAGCTTGC AAAAGGACACAACATTTGGACAAGGC  
ACTTGAATACTTGGAGTCACTCATCGATTTCTTATGGATAGTTAGCTTCTTTCAGACAATTTCTTTGGATCGGTTAAGAAA  
GTGACTATTTTGTTTTACGACATGGATTTATCATGGCACATGTGTACCCGAGAAGTGATTACAGGATTTGATTTCCAGAG  
GTATATCAAAGATCACTTGACGAGGATTTTAAAGTTGTGGTAGGCATAAGCCCAATTTATTTGGTTCTTTGCGGTTCTCT  
TCCTGCTGACTAATACTCATGGGTGGTATTCTAACTATTGGCTTCCATTTCATCCATTAATTACAATTTTGTATGTTGGT

GCTGATCTACAAATGATCATAACAAAGATGGGACTAAGGATTCAAGACAGAGGAGTAGTTATGGGTGCACCTGTGGTTGA  
GCCTGGAGATGACTTGTFTTGGTTCAACCGTCCACGACTCCTTCTCTTCATCATTTCATCTTGTCTTTTTTCAGAATGCCT  
TTCAATTAGCACATTTTTGCATGGAGTACATATGAATTCTCCATAGAATCTTGCTTCCACAAAACAAATGCAGAGAATGTG  
GTTAGACTTACAATGGGGGTTGTAACACAAGTTCTATGCAGCTATGTGACTTTGCCTCTTTATGTCTTAGTTACACAGAT  
GGTTCAACCTTGAACCAACCTATTTCAATGATAGAGTAGCAGCAGCATTGAAGAAATGGCACCATACTCCAAAAAC  
ATCTCAAACACAGCCAACACTGTGAGGCTAAAAAATCAATACCATTCTCCAGCACATCATCAAGCCCAATATTTGGCAGT  
TCTCCCATTCACCTAGCATAGACACCCCTGTTTGGGAAGAAGTGACAGTGCACAAACTTCTCCAAGGACCTCCCTCTATGA  
AAATCAACAATGTGATGTGCAAGGTGAATCTTCCGTAAGCAACCATCCAGGAACAAATGAGACCCAAATGCAAGTTTTGG  
GTTCTCCTCAAACAACATAA

>PvMLO7 Phvul.005G082500

ATGGAAAAAATGTACAAGAAACAAGGTCATTGGCCTTGACTCCTACATGGTCTGTTGCTACTGTGTTGACTGTCTTTGT  
TGCTGTCTCTCTGCTTGTGGAGCGCTCCATTACCCTTTAAGCAATTGGCTGCGGAAAACATAATCGAAAACCGTTGCTTG  
CAGCTTTAGAGAAGATGAAGGAAGAATTGATGTTACTCGGGTTTATATCACTCTTATTAACAGCTACCTCACGCATGATA  
GCTAATATTTGCATTCCATCAAAGTTCTACAACAGTGCCTTTGCTCCATGCACCTATTCCAGATTGATGAACAAATGGA  
AGAGAATGGCTCTGAAGAGCGTAAATTACTGACGGCTTCTGCTTATCATGTATTTGGAAGGATGTTAGATGGAATAAATA  
GAAGCACTTGCAAAGAGGGTTATGAACCATTTGTTTCCATGAAGGTCTAGAGCAGTTGCACCGGTTCATTTTTGTCTATG  
GCAGTAACTCATATATCTTACAGTTGTCTTACTATGTTGTTGGCCATTGTGAAGATTACAGTTGGAGAGTGTGGGAGGA  
TGAGGCTCACATGGATCGGCGTAATTCATATCTGAGATTTCAAGAGAGCTGACTATGAGAAGGCAATCAACCTTTGTCA  
AGTCTCATGCATCAAATCCATTGTTCAAAAACAGTACCCTTATTTGGGTGACATGCTTTTTCCGACAATTTGCACATTCT  
GTGGTTCGTGCTGATTATCTTACACTTCGCAAAGGCTTCATCATGAATCACCACCTTTCACTAAAGTATGATTTCCATAG  
CTACATGGTTCGGTCTATGGAAGAGGAATTCCAAAGGATAGTTGGTGTGATTGGCCCGCTCTGGGGATTGTTGTTGGCT  
TCATGCTTTTCAACATTAAGGATCTAACCTATATTTCTGGATAGCTATTATTCCTGTATCTTTGTGCTATCTTGGTGGGA  
ACAAAGCTACAGCATGTTATTGCAACCTTGGCGTTGGAGAATGCTGGAATTTCAAGGTTCTTCCAGAAGCAAAGTTGAG  
GCCTCGTATGAACTTTTTTGGTTTTAACAAGCCTGAACATTGTTGTCCTTGATCCATTTCACTCTTCCAGAATGCAT  
TTGAGCTGGCTTCATTCTTTTGGTTCTGGTGGCAGTTCCGATATGATTCTTGCTTTATTAGGAATCACCTTCTCCTGTAT  
TTAAGGCTAATATTTGGGGTTTGCAGGACAGTTTCTTTGTAGCTACAGCACCTTGCCACTATACGCACCTGTTACACAGAT  
GGGAACAAACTATAAGGCAGCATTAATCCCACAGAGGATAAGAGAAAACAATTCATGGATGGGGTAAAGCAGCTAGGAAGA  
AGAGAAGGCATGGTATGTTCCCTGATGACTCCACCATTACATACAGACACAAGCACTGTGTTGTCCATTGAAGAAGATGAT  
CAAGTAATTGATGCCCCGAAGTAGAATTACCACCAGTACGGCTGTTACACCTACCCCTTCTCCCATTGCTAATGAAAC  
TTCAAGCAGGGCTGTTACACCCCTCCTAAGACCCTCTGCCTCGATATCTTCTGTGCATAGCAGTTCTAAAGCTGAAGTAA  
TTATAAGATGCTCCTCTATGCCAAATGGGAGTTAA

>PvMLO8 Phvul.005G136700

ATGGGAGGAAGAAGCTTGGAGGAACTCCTACTTGGGCTGTAGCCGTTGTTTGGCTTCGTTTTGCTCACCATATCTATCGT  
CATCGACCACATCTTCCATCTCATAGGAAAGTGGTTGAAGAAGAAGCACAAAAGAGCACTATATGAGTCACTTGAAAAGA  
TCAAAATCAGAACTTATGTTATTGGGGTTTCATATCGCTGCTTCTAACGGTAGGACAAAAGTGAATATCGAGGATATGTATA  
TCAGAAAAGGTTGCAGGGACATTTCCACCCCTGCACCTACAAAACAGACCACACCCGCAGATTACTACCGGAGCTTTTTCCG  
TTCCGATCACAAACAAAATCTACGCCGTATTTTGGCGGGGAGGAATGACAAGTGTGCGGCACAGGGTAAAGTCCCCT  
TTGTCTCATCAGAGGCATTTCATCACTCCATATATTTATCTTCTGCTGGCTGTTTTTTCAGCTTCTTTACTGCACTTC  
ACTCTGGCTCTTGGTAGAGCAAAGATGAGAAGTGGAAACGGTGGGAAGAGGAAACAAAACAGCACAGTATCAATTTTC  
ACACGATCCTGAACGTTTTTAGATTTGCGAGGGAGACTTCGTTTTGGAAGAAGACACTTGAGTTTCTGGACTCAACACACTA  
TCTAGTTTTGGATTATTTGTTTTCTCAGGCAGTTTGTACGCTCAGTTTCTAAAGTTGATTACTTGACCTTGAGGCATGGA  
TTTATGATGGCGCATTTGGGACCTCAAAGTCGCCATAAATTCGACTTTAGGCAATATATCAAAAGGTCTTTGGAAGAGGA  
CTTCAAAGTGGTCTGTTGAAATCAGTCTTCCAATCTGGTTTCATCACAGTGCCTTTTTCTCCTGTTTACACCCATGGCTGGT  
ACTCTTATCTGTGGCTGCCATTTGCTCCTTTGATAAATTGTTCTATTAGTGGGAACGAAGCTGCAAGTGATAATAACGAAG  
ATGGGTGAGAGAATTCAGAAAGAGGAGAGGTTGTAAGGGCATGCCACTGGTGCAGCCTGGGGATGATCTCTTCTGGTT  
TAACAAACCTCGACTTATCTCTACCTCGTCAATTTCTGTGCTCTTTTCCAGAACGCTTTTCCAACCTTGCTACTTTTTCATGGA  
CTGCGGTTTCAGTTTGGGATGAAATCCTGTTTTTCACTCGCAGACGGAGGATGTGGTGATTAAAATCTCAATGGGGGTTTTT  
GTTCAATTCCTTTGCAGCTACGTAACCTTCTCTCTATGCTCTCGTACACAGATGGGTTCAACCATGAAACCAACCAT  
ATTC AACGAAAGAGTAGCCATGGCTCTGAGGAATTGGCACCATGCAGCCAAGAAACACGTCAAGCAACAGAACCCTAGAT  
TACAGTCAAGGCCACAACCCCAATCACTCTACATCTCAGGCCATCTCTTACGCCGCTGCCACAGTGAAATTGACATC  
TATCCCCTGACTCTGAGGCCATCATCCCTATGAGATGGATTTGAGCCCATCATCCAAGGTGCATGATCACGAAGTGGA  
AATGGAAATGGGCCACTTGGATCATGGCCACTAGAAGATGTGAATGAGTTGAACTCAGCCCTTGCAGGATCAGGTGTGA  
CTCAACACGAGATTAATATTTGAACACGGCAAGGAGTTTTTCAATTTGATAATAGATGA

>PvMLO9 Phvul.005G136800

ATGGGAGGAATGGAGGAAGGAATTTAGACGAAACACCAACCTGGGCTGTGGCCGTTGTTTGGCTTTGTTTTGCTCTCTGT  
ATCTATCATCATCGAATACATCTTCAATCTAATAGGAAAGTGGTTGAAGCAGAAACACAAAAGAGCTCTGTACGAGTCAC  
TTGAAAAGATCAAATCAGAGCTCATGTTATTAGGGTTTCATATCGTTGCTCCTAACGGTAGGGCAAGGTCTAATATCGAGG  
ATATGCATATCAGAAAAGGTTGCAGGGACATTTACCCTTGCCTCATAGAAGAGTGAAGCAAACAACACTCCCCCATT  
AGAACACGATGAATACCGAAATAACCGCCATCTTTTAGCGTTGGAAGACAAGTGTGCACCCGAGGGTAAAGTGCCATTTG  
TGTATCGGAAGCCATTCACCAGCTCCATATATTTATCTTCTGTGCTGGCTGTTTTTTCAGTGTCTTTACTGCATTCTCACT  
CACGCCCTTGGTAGAGCAAAGATGAGAAGGTGGAAGCGATGGGAAGTAGAAACAAAACACCAGAGTACCAAGTTTTACA

CGATCCTCAACGATTTCAGATTTGCAAGAGAGACATCGTTTGGGAAGAAGACACCTAAGTTTCTGGACCCAGAATGCTGTCC  
TGGTTTGGATTATTTGTTTCTTCAGACAGTTTGTACTACTCAGTTCCCTAAAGTTGATTACTTGACCTTGAGACATGGATTT  
ATGATGGCACATTTGGGGCCCTCACAGTCACCAGAAATTCGACTTTGGGAAGTACATCAAAAGATCTTTGGAAGAGGACTT  
CAAAGTGGTTCGTTGAAATCAGTCCCTCCAATCTGGTTCATCACAGTGTCTTTTCTCTATTTAATACTCACGGCTGGTACT  
CTTATCTGTGGCTGCCATTTGCTCCCTTTGATTTAATGTTCTATTAGTGGGAACGAAGCTGCAAGTGATTATAACGAAGATG  
GGTCAGAGAATTCAGAACCGAGGAGAGGTTGTAAAGGGCATGCCAGTGGTGAACCTGGGGATCACCTCTTCTGGTTTAA  
CAAACCTCGACTTATTTCTCTACCTCATTAATTTTGTGCTCTTTTTCAGAATGCTTTTTCAGCTTGCTTTCTTTTTCATGGGCTG  
CGTTTCAATTTATGATGAAGTCATGTTTCCAGTCCCAAAAGCAGGATGTGGTGATCAGAATCTCAATGGGGATCTTCGTT  
CAATTCCTTTGCAGCTACGTCACTCTTCCCTCTCTATGCTCTCGTGACGCAGATGGGTTCAACAATGAAGGCAACGATTTT  
CAACGAAAAAGTAGCGATGGCTCTAAGAAATTTGGCACCACACTGCGAAGAAGAACGTGAAAGAGAAGCGTGGAGTACGAT  
CGCAGAGTCCCTTTGTCAACTCGGCCCTTCAACCCCGCAGCAGCAGCCAAAGTCGCAGGCTAATCTGCTGAGACGGTACCAC  
AGTGAATGGCGACTTATCCATCTTCTCCGATAAGGTTGATTTTGGGCACATCTTCTTATGGGATCCATTCACCCCC  
CTCCTCCATGGTTAATGCTGCAGCTACTTCTTCTATTTCATCGCCATGAAATGGAGATGGAAACGGAAATTTGAAATGGATC  
AGGTCTCAGCTCTCACTCAACGCCAGATTGATATTGACATTGACATTCAAGACAATCAAGAATTTTCTTTTGTCTAAAAGA  
TAA

>PvMLO10 Phvul.006G133800

ATGGCAGAAGAAGTGAACGACTCTCTGGAATATACACCAACATGGATTGTTGCGGTTGTTTGGCTCCATAATTGTTTTTTCAT  
CTCTCTTTGTGTTGAACGTGCCCTTTCACAACTCGGAAAGTACCTAAGGAGCAAAAATCAGAATGAATTGTATGAAGTCT  
TAACAAAATTTGGAAGAAGAATTGATGCTTTTAGGGTTTCAATTTCCCTCTTATTAACCGTCTTTCAAGGTTTAAATAAGCGAC  
ATTTGCATCTCACCAACCTTGCACCCAAATGCTTCCATGCAAAAGGCCCTCATAGGTCTTTCACAAGGTTTCAGAGCATT  
TCAGATATACTATGATTTCTATAATAAACAGAAGAAGGCTTTTTTCTACTGGTCTGGTTTCAGATCATTGTACACATAAGG  
GGAAGGTTCCACTGTTATCATTGGAATCTTTACATCAGCTTTCACATTTTTATTTTTGTATTGGCCGTTGTACATGCAATA  
TTCTGTGTACACAATGCTTCTTGGAGGTGCAAAAGTACGGGAATGGAAGGCCCTGGGAGGATTATTATGGAGACCACAG  
AGAAGTAATGATAACCCATGAGTTCTTCAAAACACGTGATCGAGGACATTGGAGAAAAGCAGCTGTGATTAGCTGGCTGA  
TATCATTCTTCAAGCAATTTTCATGGCTCTGTTACAAAGTATGACTACTATGCACTTTCGGCATGGATTTGTCAAGAAACAC  
TACCCAGATAATCCACATATAATTTTTCATAATTACATGCTGGGGACACTTGAAGAAGACTTCAAAAGAGTTGTAGGTAT  
AAGCTGGTACCTGTGGGCTTTTGTGTGCTGTTTTTGTGTTGAACATTGGAGGATGGCACACTTATTTCTGGTTAGCCT  
TTTTACCATTGATACTTCTGCTTCTGGTGGGGGCAAAGTTGGAGCACATAATCGCTCGTTTGTATCAGGATTCAATAGGC  
GTATTGGGAAGAGAAGATGACAATTCATGAAGCCATCAGATGAATATTTTTGGTTTACCAGCCACCCCTAGTCTCCA  
CTTACTTCACTTCAATTTTGTTCAAAACCTTTTTGAGATTGCATTTTTCTTCTGGATTTGGTGCACATATGGATTTGATT  
CATGCATTATGGAGAAAGTAACCTACGTTATCCCAAGACTTATAATGGGTGTAATTGTTCAAGTGTCTTTCAGTTATAGC  
ACCTTGCTTTGTACACTATTGTGACTCAGATGGGTAGCAAGATCAAGAGTCAGAAGTCGCCTCCAAGTGACCCCTCAA  
AACCCGCATTCCAACCTACATGATAAAAGAATCAACCCAAATTGATGAACAAGCAATAATCATGGTGGAAAGATGCAACAT  
CTTCAATTGAGCTTCCACACATTGTCCATCTTCCCTTCGAGAAACCTAATACATCTAACAATTA

>PvMLO11 Phvul.006G216900

ATGGCAGAGGTGCTGCAGCGAGGTGCTCTCTGGCTGAGACACCAACATATTTCAGTTGCCTCTGTTGTTGCTGTGATGGT  
CTTTGCTGCTTATTTGGTTGAACGTTCAATCTACCGCTTTGGAGAGTGGTTGAAGAAAACAAGAAGGAAGGCACTTTTTG  
CTTCACTGGAGAACTCAAGGAAGAGCTGATGTTGCTTGGACTTATCTCTTTGCTGTTGGCACAAAGTGAAGATGGATC  
TCTGAAAATTTGTGTGACTTCTGCTACCTTTTAGCAGTTCGATTTTATATTTGTTCTGAGCAAGACGTGGACATAAATGAGAA  
TATCATGTGGAAAGCTCATCATCTATCCCTGATGAAACTAGTATTACTGGAGCATTCAACCAATGTGGAGAGGGTC  
ATGAACCTTTTTGTTTTCATATGAAGGCTTTGAGCAGCTGCACCGGTTCTTATTTGTTCTCGGAATCACTCATGTTTTGTAT  
AGTTGCTGTCGAGTTGGTTTGGCAATGAGTAAGATCTATAGTTGGCGCAGATGGGAAAATCAGGCTAGGATGCCAAGTGA  
TGGAAACCAGCAAGCAAAGAAAATCAAGTTGATGAAGCGACAGACAACATTTATTTTCCATCGCACTTCTCATCCATGGA  
GCAGGAGTCCAATCCTAAACTGGATGCTCTGTTTCTACGTCACTTTAGGAGCTCTATACGAAAATCAGATTACCTTGCA  
CTACGTTTAGGTTTTCATCACTGAACACAATTTGCCGTTATCTTATAATTTCCATCAATATATGGTTTCAAGCATGGAAGA  
TGAATTTTCATGGCATCTAGGAATAAGCTGGCTGCTTTGGATTTATGCCATAGTGTGCATCTTCTGTAACATCCACGGTC  
TGAATATATACTTCTGGCTATCATTATCCCTGCAATCTTGTGATGTTGATAGGGGCAAAGCTTCAACATGTTGTATCC  
ACCTTAGCACTTGAATTTATGGAGCAGACAGGTCCGTTTCTTAGGACACAAGTAAAGCCACGCGATGATCTATTCTGGTT  
TAAAAAACCAGATATACTGTTATGGCTGATACAGTTTGTATATTTTCAGAATGCATTTGAAATGGCAACGTTTATTTGGA  
CATTGTGGGGATTCCAAGAACAATCGTGTTCATGAGAAATCATTACATGATCATCATTCCGTTGGCATCTGGTGTCTATT  
GTTCACTTCTGGTGTAGCTACATGACAGTGCCTTGGAGCATAATAGTTTCTCAGATGGGATCGAAATGCAAGAAGGCCTT  
GGTGACAGAGAGTGTAGAGAGTCTCTGCATAGTTGGTGTAAAAGAGTGAACACAAGTCTAAGCATGATTCTGTTGCATT  
CACACACTGCAAGATCAGTATGCTCCCTGGAATCAACAATTGATGAGAGGGACGAAATGACAGTAGCATCTGGGACTCTA  
ACTCGATCCTCTTCTTTAGGGTCTTTGAATCAGATAACAGTGAAGTTGAGTAGAACAGCTGAAGTTGGAGACCCCCAACAA  
GGCAAAACATTCAGGTAG

>PvMLO12 Phvul.007G093600

ATGGGCAAAGAAGAAGTTCTACAGAGGAAGTTGGAGGCAACTCCTACATGGGTAGTTGCAGCTGTGTGCTTTGTGATGCT  
TGCTATTTCAATCATCATTGAACATGTTATTGAAGAAGTTGGAAAGTGGTTAAAAAAGAAACACAAAAGGCTCTTCATG  
AAGCGCTGGAAAAGATCAAAGGAGAGCTTATGCTGCTGGGATTCCTATCCTTTCTCTTAGTGGTGTGTTGAAGATCGAATT  
GTTTCTATCTGCATCCAGAAAGTGTGATCCACTTGGAAATCCTTGTGATCCAGTTATGTGAGTAAAGGTGCAGAAGG  
ATATGTTGAGAAATGCGCAAAAAAAGGAAGGCACAGTTGCTTTTTATGTCTAAATATGGGCTTACCAGCTCCATATAT

TCGTCCTTTGTGCTTGTCTATTTTTTACATTCTACAGTGCATCATGACACTGACTTTGGGTAGAACTAAGATATCAATATGG  
AGGAAGTGGGAAGACGAAACAAAGGGTCTTGAACATCAGTTCTCCCATGATCCTGAGAGGTTCCAGGTTTGTAGGGATAC  
AACGTTTGGACGAAGGCACCTTGAACATCATGGAGTAAATCACCAACTTTATTATGGATAGTTAGCTTCTGCAGACAATTCT  
ATGGATCACCTAATAAAGCTGACTATATGGCATTACGGCATGGATTTCGTCTGGCACATTTGACTCCAGCAAGTGAGCCA  
AAATTTGACTTCCAGAACTATATCACCAGAACACTAGATGAGGATTTTGCAGTAGTGGTGGGCATAAGTCCAACCATATG  
GTTCTTTGCAGTGGTAAATTTCTGCTCACAATACTCACGGGTGGTATTTCTTATTTTTGGGTTCCATTTATCCCACCTAATTA  
TAATCTTGTGGTGGGAACAAAGCTACAAATGATCATAACAGATATGGCACTAAAGATTCAAGATAGGGGGGAAGTGGTC  
AAGGGTGAACCAGTGGTTCAGCCAGGAGATGAATTGTTCTGGTTCATAAATCCTCGCCTCGTTCTCTTTCTGATTCATCT  
TGTTCTGTTTCTGAATGCATTTCAATTGGCGTTTTTTTACTTGGAGCACATTAGACAATGGGTTCAAATAAACTCCTGCT  
TTCACCGAACTACTGCAGATATTTGTCATTAGACTTACAATGGGGGTTCTCACCCAAGTTCTATGCAGCTATGTGACTTTG  
CCTCTTTATGCTCTAGTCATACAGATGGGTTCTAGCATGAAACCCACCATTTTCAAAGATAACGTGGCATCAGCACTAAA  
GAGCTGGCATCACCTGCTAAAAAGCATCTGAAACACAACAGGGATTCAACTTCTAACACACCATTCTCAAGCAGACCAG  
GAACCCCAACTCGTGGCATGTCTCCAGTGCACCTGCTTACAAGCACCTTAGACACAGTGTAGTCCACTAGTTTCTCCA  
AGAGCATCCGATTATGAAAATGGGCAATGGGATGCTGAAGTGTACATTCCCCAAGCCACCATGCAAGAGATATTGATCA  
TGAAGAGACCATGCAGGTGCAGCTCCAGCAGCAGCAGAATTGCCTCCTGCTGGACTCAATCCTGTTTGAAGTCAACATG  
AAATCAACATTGCTTTATCTGAATTTTCAATTTGGGAGGGGACGCAACCCTGGTAGAGCAGATGAGTATTAG

>PvMLO13 Phvul.009G006800

ATGGCTGGTGGAGCATCCGGTGGAGAAAGAAGCTTGCAGGAAACACCCACGTGGGCAGTGGCTTCTGTTTGGCAGTCTT  
CGTCGTTCTCTCTGTGTTAATTGAACATGGAATCCATTTACTTGAAGAGTGGTTTCAAAAACGAAATAAGAAAGCCATGA  
GAGAAGCCTTGGAGAAAATCAAAGCAGAATTAATGCTATTAGGATTTATATCCCTGTTAATTTACTTTTGGTACAAAATAC  
ATTGCAAAGATATGCATCCCTACATCAGCTGGTGTATCATGCTCCCATGCAAGAAGGTGGAAGAGTCAAAGAACTCCGA  
TGATTTCAAATGGCAGGAAGTTACTTTACTTTGAGGACAATATGGAATGGCGTGCAGTTTTAGCAACTGCGTCTTCTGTTG  
GTGACTTTTGTCTCACAGAAAGGTAAAGTGTCTGATTTCTCAGTCAAGGGTGCACCAATTCATATATTTATTTTCTGTTG  
CTTGCTGTTTTTTCACATACTGTACAGCGTAATGACCATGGTACTAGCCGAGCAAAAATGAAGAAATGGAAGCCTGGGA  
AGCTGAAACATCATCTTTGGAGTATCAATTTACAAATGATCCTTCAAGGTTTCAAGTTTTGCGCATCAAACATCATTGTTA  
GGCGTCACTCTGGTTTTGTCTAGGATGCCAGGAATTCGATGGATTGTAGCTTTCTTCAAGCAATTTCTTTGCGTCTGTACG  
AAGGTGGATTACATGACCATGCGGCATGGATTCAATTAACGCACATTTTGTCTCCCAATAGCAAATTTGACTTCCAAAAATA  
CATTAAGATCCATGGAGGACGACTTTAAAGTGGTCTGTTGGTATAAGTATTCGGTTATGGGTTTTTGTCTATCGTCTTTA  
TGCTTGTGAACGTTTACAAATGGTACACTCTCACCTGGCTATCATTAGCGCCGCTAGTGTACTTCTATTAGTAGGCACC  
AACTTGAACTTATAATCATGGAATGGCCAGGAAATCCAAGATCGAACCCTGTTGTGAGAGGAGTCCCTATTGTAGA  
GCCAACAAACAAGTATTTTTGGTTTTAATCGGCCCTCAGTGGATTATCTTCTTAATCCACTTTACCTTGTGTTGAGAATGCAT  
TCCAAATAGCCTTTTTCTTGTGGACATGGTATGAATTTAAGATCACATCTTGCTTCCATGAAAACCTTGCCGCTAATACTG  
ACAAGGTTTTTCTTGGGATAGCATTGCAAGTGGTGTGAGTTACATAACATTTCTCTCTACTCCCTTGTAAACACAGAT  
GGGATCTCACATGAAGCAAGCAATTTTTGAAGAGCAAACCTGCTAAAGCACTAAAGAAATGGCAAAAGGTTGCAAAAGACA  
AGAGAAAGTTGAGAAAAGCAGGGGTAGATGTTCTTTCAGGAACAATGAGTGGGGAAGCAACACCAAGCCAAGGCACATCA  
CCCATACATTTACTTCCAAAGTACAAGCCTAGCCAAACAGACACAGATGTTGTTCTCTATTCTCCACGATCATACCAATC  
TGATACTGACTTCTCTGACACAGAGGGGTATCACACCAACTCAATCAAATAACACAAACTCATCAAGCTCCAAGAAATG  
GAGAGGCTCACAGTATCGAATTTTCTTTGTGAGCCATAACAATGTCCAATTTTGA

>PvMLO14 Phvul.009G007000

ATGTCGGGAGGAGGAGCGGTGACTCCAGACAGCTAGATCTCACGCCTACATGGGCTGTGCGCCGCGTTTTGTGCAATTAT  
CGTCTCATTTCTATACTCTTGGAAAAAATCATACACAAATTCGCAAGGATGTTTGAAGAAAAAAGAAACATGCTTTGC  
TAGAAGCTCTTGAGAAGATTAAGCCGAGCTTATGGTCTTGGGATTTATTTCTTACTTCTAACGTTTTGGTCAAAAACACTAC  
ATTTCTAAAGTGTGTATTTCCCAAAAGTATGCACACACAATGCTACCGTGTCTTCCCATGACCAACGTGACGGAGGGGG  
TCCCGCAACCGAACACGGAGCGGGTGCAGCAACCGAACACGGAGCGGGTGCAGCAACCGAACACGGAGCGGGTGCAGCAA  
CCGAACATGAAGTTGAACCTGAGGGAGAGGGGGGCGAGAGTGTGAAGGAGGTGGCCATCGTTCGAGAATTTTATCATAT  
GATCGTAGATTTCTATCTGGTGGTGGTGGAGGCCAGTTGTAACCAGGGGAAGCTGCCTCTTATATCAGTGAACGGGTT  
GCATCAGTTACACATTTTTTATATTTTTTCTTGGCTGTCTTCCATGTGATATACAGTGCATAACAATGACCCTTGAAGAG  
CAAAGATTCGTGGGTGGAAGGCATGGGAGGAGGACCATGTCGTGGATGAAGATGCCTTGAATGATCCTAGAAGATTCAGA  
CTTACTCACGAGACATCATTTGTGAGGGATCACAGCAGTTTCTGGACTAAAACGCCAGTTTCTTCTATTTTTGTATGCTT  
CTTTCGACAATTTTTTCTGATCTGTTTCGAGGGCTGACTACTTACCATGAGACATGGATTTGTGACTGTCCATTTAGCAC  
CGGGAAGTAAGTTGATTTTCAAATAATATCAAGAGGTCAATTAGAAGATGACTTTAAGGTAGTTGTAGGAATCAGTCCA  
ATACTTTGGGGATCAGTAGTGTATTCTTGTGTTGTGAATGTCCATGGATGGCATGCTGCTTTTTGGGTTGTCTTTTCTCCC  
TCTAGTGGTGTATCTTGTCTGTTGGAACAAAACCTTCAAGCAATTTACTCGAATGGCACTTGACATAAAAAGAAAGGCATG  
CTGTAGTGCAGGGGATCCCTCTTGTGCAAGTCTCTGACAAGTATTTTTGGTTTGCATGGCCTCAGTTAGTTCTTTATCTC  
ATCCATTATGCTCTTTTCAAGATGCATTTGAGCTGACATACTTCTGGTGGACATGGTATGAATTCGGCTGGGATCTG  
CTTTTACGAGGATGATCTGTTCTCATGATCATCAGAGTAGCTTCTGGGCTGGGAGCTCAAGTCTGTTTGCAGTTATGTACAC  
TTCCACTCTACGCACTCGTTACTCAGATGGGATCGACGATGAAGAAGTCAATATTTGATGACCAAACGTGAGGGCGCTG  
AAACAGTGGCATAAGAATGCCCTGAAGAAGAAAGCGTCAAAGGACGCCACGAAACTCGAACGTTAGGTGGGAGCCCGGG  
AGAGCATACACCGGAACATTCGCCGCACCCGCCACCAGAGACACAGAAATGGCTGCTCAGACCGCCACCATCGTCA  
CCAGCGTTGATAACGAAACCTATGATAAGCGGGACCTTCTAACTGGACCGTGA

>PvMLO15 Phvul.009G117900

ATGAGTGGCGGAGGAGGAGAAGAGGGAGATAGTCTGGAGTTCACCTCCACCTGGGTAGTGGCCGCCGTTTTGCACAGTCAT  
CGTCGCCATATCCCTCGCCGAGAGCGCTTTCTTCAATATGGCGGAAAGTTTCTCAAAGCCAAGGACCAGAAGCCGCTCT  
ACGAAGCTCTCCAGAAGATCAAAGAAGAGTTGATGTTGTTGGGCTTCATTTCCCTCCTTTTGACGGTTACGCAAAACGGC  
ATTACCAAAATCTGCGTTCGCCCGGGCTTCACGCGCCACATGCTTCCGTGTAGCCTCGACCTCGCCCCAACCCACGAATC  
TCATTTCCAGACTTTTTATTTCCCGGAACACCCAGACGCTTCTGTGCTGCCACTGCGGAGGAACACGCGCCGCCACT  
CCAAGGCTGAGACTGAGACCCGACTGGTTTTCTGCTCTCGCAAGAACAAGGTACCTTTGTTGTCTGTGGAAGCCTGCAC  
CACCTCCACATCTTCAATTTTTGTCTTGGCTGTGCTACACGTACCTTTTTCCGCACTCACCGTTATCTTTGGAGGTGCTAG  
AATTCGTTCAGTGGAAACACTGGGAAGATTCAATTGCAAAACAGAACTACGCAACCGACCAGGTTCTGAAACCAAAGGTGA  
CTAATGTTTCAGCAGCATGATTTTTATCAGGGACCGTTTTTCTGGTTTTGGCAAAGACTCTGCTATAGTCGGTTGGTTGATA  
TCCTTTTTCTAAGCAATTTTTATGGATCTGTGACAAAATCAGATTATGTGACGTTACGACATGGTTTTATTATGACCCACTG  
CAGGACAAAATCCAAAGTTTAAATTTCCACAAGTACATGATCCGTGCCCTTGAAGATGATTTCAAGAAAGTTGTTGGTATAA  
GTTGGTATCTTTGGCTCTTTGTGGTTATCTTCTTGTGCTCAATATCAATGGTTGGCATAACATATTTCTGGATTGCTTTT  
ATTCTGTCTATCTATTGCTTTCTGTGGGCACTAAGCTGGAGCATGTAATAACCCAACTAGCTCACGACGTGGCTGAAAA  
GCATGCAGCCATAGAAGGTGACTTAGTTGTGCAACCATCAGATGAACACTTTTGGTTTTCATCGGCCCGGTGTTGTCTCT  
TCTTAATTCACTTTATCCTTTTCCAAAATGCTTTTGGAGATAGCATTTTTTTTTCTGGATATGGGTTACATATGGATTTGAC  
TCGTGTATAATGGGGCAAGTTCGATACATTATCCAAAGGCTCGTTATTGGGGTATTTATTTCAGGTATTATGTAGCTACAG  
CACTCTGCCACTCTATGCATTAGTTACGCAGATGGGAACCTCACTATAAGAGGGCAATATTTAATGATCATTGCAACAAA  
ACATTTGTTGGTTGGGCACAAAAGGCGAAGAGGAGGAAAGAACAATAATGCTGATGGCAATCCTGGCCAAGGAAGTTCTCAG  
GAAAAATGGTAATACAGGAATCCAGCTTGGGTGATTTTCCCGAAGAAGGCATCTGGTCCAGGAAACAGTTCTTCTGCCCC  
CAAAGCTGACCGAACAGCTGA

>PvMLO16 Phvul.010G034400

ATGGGTGGTGGTGGTGGTGAAGAAGGGAACAATTTGGAATTCACCTCCACTTGGGTGGTTGCTGTTGTTTTGTTCTGTGAT  
CGTTTCTGCTTCATTCGCTGCAGAACGGTTTTCTTCACTATGGAGGGACTTTTTCTCAAGAAGAAGAATCAGAAGCCACTCT  
TTGAAGCTCTGCTGAAGATCAAAGAAGAGTTGATGCTGTTGGGATTTATTTCTCTGCTACTGACTGTAACACAAAATGGG  
ATTATCAAAAATTTGTGTTCCCTGAGAGTTGGACTCGCCACATGCTTCCCTGCACTTTAAGGACAAAAGAAGAGTTAGAATC  
AGCGAAACTCACATCACATTTTTAGACTTTTTTCTCTTCACTGATATCCAGCCACTGTAAGGCACCTTTTTAGCTGAGA  
ATGAGAATGAAGATCCCAATCTGGTGAAAAACTTGGACACTGTGCTAAGAAGGGCAGGGTTCCTCTATTATCTGTGGAG  
GCACTGCATCACTTGCATATCTTTATTTTTGTCTTAGCCATAGTCCATGTGACATTTTTGTGTTCTCACTGTTGTTTTGG  
AGGGTTAAAAATACGTCAGTGAAGCACTGGGAAAACCTTATTTGTAGATGAGAATAATAGAAAACAACCAGTTTTGGAAT  
CAATAGTGACTCATGTTACGAACACGCTTTTCCAGAAATCATTACTGGTTTTGGCAAAGATTATGCTGTTTTGGGT  
TGGCTGAAATCATTTTTCAAGCAATTTTTATGGATCTGTGACAAAGTTAGATTATGTGACATTAAGGCTTGGTTTTATTAT  
GACTCATTGCAGAGGAAATCCAAAGTTTAAATTTTCAAAATACATGATTTCGTGCCCTTGAAGACGATTTCAAGCAAGTTG  
TTGGTATAAGTTGGTATCTTTGGATCTTTGTGGTCACTTTCATGTTGCTTAATGTCCATGGTTGGCACACATATTTTTGG  
ATTTCTTTCATTCCTCTCATTCTTCTACTGGCTGTGGGTACTAAGTTGGAGCATGTGATAATTCATAGCTCATGAAGT  
GGCTGAGAAACATTCAGCCATAGAAGGTGAATTAGTTGTTCAACCAAGAGATGATCACTTTTTGGTTTTCATCGCCCCACA  
TTGTCCTCTTCTTGATTCACTTCATCCTTTTCCAAAATGCTTTTGGAGATTGCATTTTTCTTTTGGATATTGTTTACATAT  
GGTTTTGACTCATGTATAATGGGACGCGTCCGTTACATTGTTCCAAGGCTCGTTATTGGGATATTTATTCAAGTACTATG  
CAGCTATAGTACCCTACCCTTTATGCAATTTGTAACACAGATGGGAACCTCACTTTAAGAAAGCCATATTTGATGATCAAG  
TGCAAGCACGCTCTTGTGGTTGGGCACAAAAGGCAAAGAAGAAAGGTTTGGAGAGGTGATAATAATGGCCAATCTGTTCAA  
GGAAGTCCCTCATGTGGGTGCTGGAATTTCAACTAGGACCAGTCTTCCAGGAAGCCATCTCCCCAGAAGACACTGTTTTACC  
CTAG

>PvMLO17 Phvul.011G073800

ATGGCAGGTGGCGGAGGAAGAAACTTGGAGGAAACACCCACATGGGCCGCTCTCCACTGTCTGTTTTGTTCTGATCTTTAT  
ATCTATAATCATCGAACACATCATCCACCTCATAGGACAGTGGTTGAAGAAGAAGCGCAAAAGAGCGCTGTACGAGTCAC  
TCGAAAAGATCAAATCAGAGCTTATGTTATTGGGGTCTTGTGCTGCTTTTAAACGGTAGGACAAGGTCTGGTATCAAGA  
ATATGCATATCAGAAAAAATGTCATCGACATGGCACCCTTGTAGCGCCGACGACACGCATAGTGAAGAATCAGGACAGGG  
AACCAACAGCCGAGGTTGTTAGCGGCGTTCATGGTTCAAACGATGTAATCCACGCCGTGTTTTGGCGGGAGGAGGAA  
GTGACAAGTGTGGCGAGGGTAAAGTCCCCTTGTGTCATCGGAGGGAATCCATCAACTCCATATATTTATCTTTGTGCTA  
ACTGTTTTTTCATGTCCTTTACTGCATTCTCACCATGGCTCTGGGAAGAGCAAAGATGAAGAGGTGGAACGATGGGAAGA  
GGAAACCAAGACACCAGAGTACCAATTTTACACGATCCTGAACGATTTAGATTTGCGAGAGAAACATCGTTTTGGAAGAA  
GGCATTTGAGTTTCTGGACCAAAAACCTGTTCTCATGTGGATTGTTTGTCTTTTAGGCAATTTGTGCGATCAGTTCTCT  
AAAGTGGATTACTTGACCTTAAAGACATGGATTTATCATGGCACATTTGGCTCCTCAAAGTCACTCCAAATTTGATTTTTCG  
GAAATACATAAAAACGATCACTGGATGAGGATTTCAAAGTCTGTTGTTGGAATCAGTCTCCATTCTGGTTGTTTCGCGGTGC  
TGTCTCTCTCTTGAACACTCATGGCTCGTACTCTTATCTGTGGCTGCCATTATTCTTTGATTATCATTCTGTAGTT  
GGAACCAAGTTGCAAGTATCATAACTGAGATGGGTTCAAGAATCAACAAGAGGAGAGATTTCTGAAGGACTGCCCCT  
GGTTCAACCCAGGAGATTTATTTGTTCTGGTTTTAACAACCTGGTCTTATTTCTTTACCTTTAATTAACCTTTGTGCTCAGA  
ATGCTTTTTAGCTTGTCTTCTTCTCTCTGGTCTGTGCTTCAATTTGGGATTAATCTTGTTTCCACGCACATACAGAGGAT  
GTAGTGATCAGAATCAAAATGGGGTCTTATTCAAATCCTGTGCGACTACGTTACTCTTCTCTCTATGCCCTAGTTAC  
ACAGATGGGTTCAACAATGAAGCCAACGATATTCAACGAAAGAGTTGCTGAGGCACTGCGGAACCTGGCACCAGACCCGGA  
AGAAGCAGATAAGACAGAACCGTGTGGGACCTTGTGCTGTTGCGGTGACACCGATGTGCGAGCAGACCCACAACCCCGAGC  
CACAAATGTCCTCCAGTGCACCTCTTGGCTACTACCGTCTGAAATTTGACAGCTTCCCCACCTCTCCACGACGTTGAA  
CGTCGACGGCGACCACACCCAGCCCTGGGACGTTGAATCCCCTTCTCTTCTACTCGCACACGAAATGGAAATGGGTCT



ACACCAATGACCCCACCACTAACACAACCCACCATGAGATTGTTCCCTGCTGCAAACACCAGGGAATTCTCCTTTGATAAA  
AGACCTACCACAGCTCCGTAG

>PvMLO18 Phvul.011G122800

ATGGACATGGAAGAACAAGATCCCCTGAAGAACTTCAACATGGGCTGTCTCAGTTTTCTGCTTCTTCTTTCTTCTAAC  
ATCTTTGATCATTGAGGGCAGTCTCCACAAATTTGGCTGAGATATTGAGGAAAAGGAAAGACAAATCACTAGGGAGGGCAT  
TGACTAAAACAAAACAGAAATGATGAAATTCGGTTTTATGTCTCTTTCTTCTCACCATATCGGAAGTGCCAATATCGAAA  
ATCTGCATCAGCAAGGGTGTGGCAACATATTTTCTCCCTTGCAAAGATGCTGTGGACTTAACAGGGTTATCAGCTACTCG  
TACATCAACCTCAGAATTGGACGTAGCACATGCAACAAACCAATCTAACGTTGAGTTCAACTATTGTGAAGCAAAGGGTA  
TGGTTAGTTTAATTTCAAGTGAAGGAATCCTGCAGCTAAATATATTCATCTCCTTTTTGGCTGTTTTTACATCTTCTTC  
TGCACATTGACAATGTGCCCTTGGTAAAGCAAAGATGAGAAGATGGAAAAGATGGGAAGAGGAGACCCGAACACTTGAATA  
TCAGATAGCAAATGATCCAAGAAGGTTCCAGTATACAGGTCAAACAATGATTGGAAAGCGCCATTTGAATTTCTGGAGCT  
ATCATTCTCCTTTGCTTTGGATGGTCTGCTTTATTCGGCAGTTTTATGGCTCAGTCTCAAAGATGATTACTATACTCTA  
CGAAATGGGTTTTATTGCAGCTAATATTTCTTTAGGCAGCAATTTCAACTTCAAGAAATTTCTTTCCCGCACTTATGATGA  
AGATTTTGAGAAGGTTATGGGAATCAGGATTTGGATCTGGATATTCTCCATACTTTTTCATCTTTTTTAGTGCACATGAGT  
TCTATAAATTACTACTGGCTTCCATTTATCCACTTATGGTTGCTTTACTTGTGGGACAAAACCTCCAAGTCATAATAACA  
AAGATGTGTGTAGATAGTTGCAAGGCAAACCCAGTGATCAAAGGGAGTCTACTTGTAAACACCTAGTGATGCCATTTCTG  
GTTTCATCGACCTGAATGGCTTCTGTATTTACTCAAGTTCATCCTTATCCAGAACTCCTTTCAACTTGCATTCTTCACCT  
GGACTTGGTATGAATTTGGTCCAAGGTTCTGCTTCAATCGAGAAAATGAGGACATTGGCATAAGGATTGCCATGGGTATA  
GCTGTGCAGCTCCTTTGTGGTTACGTCACACTTCCCCTTTATGCACTTGTACTCAGATGGGTTCTAGCATGAGGAGAGA  
AATTTTCACTGAGAGAATTTCTAGGGGCCCAAATAATGGGCACAAAAGGCTAAACAACTCTGCACAAAAACAACCTCAA  
CTTCAAGCAAACACTCAGATTTCTTGCATTTCAAAGGAGGTGACAATTCAGCAAGAGGAACAATGCAAAGTGTGCACACC  
CCAGATAATGTAGCATTACAAAACAACCCCTTCTCCCTCTAATGAGGGAAAGAGAATTTGCTTCCACTAATAATGAACAAGA  
TACATCAAGTCTTTCGAAATCACAGTCTAGGAAAGAGAATCCCAAGATCATCACCAGAGGAACCTATGACG  
GTGAGATCTCATTGAGGAGTAGCTGGAAAAATGTGGGAAGTAGCAGGGGCATCAGAGAAATTTGGCTCAATAACTGAAGAA  
GATGATGCTGAAAAATTCGCTGAACCTTATCCATAG

>PvMLO19 Phvul.011G172300

ATGGAAAAAATGTACAAGAAACAAGGTCATTGGCCTTGACTCCTACATGGTCTGTTGCTACTGTGTTGACTGTCTTTGT  
TGCTGTCTCTCTGCTTGTGGAGCGCTCCATTCACCGTTAAGCAATTTGGCTGCGGAAAACCTAATCGAAAACCGTTGCTTG  
CAGCTATAGAGAAGATGAAGGAAGAATTGATGTTACTCGGGTTTATATCACTCTTATTAACAGCTACCTCACGCATGATA  
GCTAATATTTGCATTCCATCAAAGTTCACAAACAGTGTCTTTGCTCCATGCACCTCGATCCAGATTGATGAACAAATGGA  
AGAGAATGGCTCTGAAGAGCGTAAATTACTGATGGCTTCTGCTTATCATGTATTTGGAAGGATGTTAGATGGAATAAATA  
GAAGCATTGCAAAGAGGGTTATGAACCATTTGTTTCCATGAAGGTCTAGAGCAGTTGCACCGGTTCAATTTTTGTCTATG  
GCAGTAACTCATATATCTTACAGTTGCCCTTACTATGTTGTTGGCCATTGTGAAGATTCACAGTTGGAGAGTGTGGGAGGA  
TGAAGCTCACATGGATAGGCGTAATTCATATCGGAGATTACAAGAGAGCTGACAATGAGAAGGCAATCAACCTTTGTCA  
AGTCTCATGCATCAAATCCATTTGTTCAAAAACAGTTCCTCCTCATTGGGTGACATGTTTTTTCCGACAATTTGCACATTCT  
GTGGTTTCGTGTTGATTTATCTTACGCTTCGCAAAGGCTTCATCATGAATCACCACCTTTCAATAAAGTATGATTTCCATAG  
CTACATGGTTTCGCTCATGGAAGAGGAATTCCAAAGGATAGTTGGTGTGATTGGCCCGCTCTGGGATTTGTTGTTGGCT  
TCATGCTTTTCAACATTTAAAGGATCAACCTATATTTCTGGATAGCTATTATTCCTGTATCTTAGTGTCTATTGGTGGGA  
ACAAAGCTACAACATGTTATTGCAACCTTGGCGTTGGAGAATGCTGGAATTCGAGGTTCTTTCCAGAGGCAAAGTTGAG  
GCCTCGTGATGAACCTTTTTTGGTTTTAACAAGCCTGAACCTATTGTTGTCCTTGATCCATTTCACTCTTCCAGAATGCAT  
TTGAGCTGGCTTCATTTCTTTTGGTTCTGGTGGCAGTTCCGATATGATTTCTTGCTTTATTAGGAATCACCTTCTCCTGTAT  
TTAAGGCTAATATTTGGGTTTTCAGGACAGTTTCTTTGTAGCTACAGCACCTTGCCACTATATGCACCTGTTACACAGAT  
GGGAACAAACTATAAGGCCGATTAATCCCACAGAGGATAAGAGAAAACAATTCATGGATGGGGTAAGGCAGCTAGGAAGA  
AGAGAAGACATGGTATGTTCCCTGATGACTCCGTCACCATTACACAGACACAAGCACTGTGTTGTCCATTGAAGAAGAT  
GACCAATTAATTTGATGCCCTTGAAGTAGAATTACAACAGTACGGCTGTTACATCCACCCCTTCTCCCATTTGCTAATGA  
AACTTCAAGCAGGTTAGTTACACCCCTCCTAAGACCCTCTGCCTCAATATCTTCAGTGCATAGCAGTTCTAAAGCTGAAG  
TAATTATAAGATGCTCCTCTATGCCAAGTGGGAGTTAA

>VrMLO1 JJMO01000124

ATGGCATCCAAAGTTTATGAGCGAACTCTTGAGGAACTCCAACATGGGCTGTTGCAGTTGTGTGTTTTGTGCTGCTTGC  
TGTTTTCAATCGCCATAGAATCTTTATTCATGGTATTTGGAAAGTGGTTAAGAAGAAACGAAAAATGCTCTATTTCGAAG  
CGTTGGAGAAGGTCAAAGGAGAGCTTATGGTGTAGGATTCATATCCTTGCTCTTAAGTGTTTTGAAGATCAAATTTCA  
AAGATCTGCGTGTGCAAACATGTTGCATCCACGTGGCATCCTTGTGAGAACCCAAAGTCTCAACTACTACATCTGAGGA  
TGAATCTGAGGACATTCAGATAAATTTATAGGAACTGCTACAACCTTTATGACTCTATAACCAAGGCGTGTCTCGCGACAA  
AAGGTTACGACAAGTGCCTGAAAAGGGAAAAGTTGCTTTTGTTCAGCATAATGGGATTCACAGCTGCATATATTTTCATC  
TTTGTGTTAGCAATATTTTATATCCTACAGTGCATAATAACACTGGGTTTGGGAAGAACAAGATGAGAAAATGGAGGGC  
ATGGGAAAAATGAAACCAAGCAATGAAATCAATTTTACAACGATCCTGAGAGGTTTCAAGTTTGAAGGGACACAACAT  
TTGGAAGAAGACACTTGTAGTCTTGGAGTCACTCAACAATTTCTTATCCATTGTTAGCTTCTTCCGACAATTTCTTGGGA  
TCAGTCAACAAAGTGGATTATTTAACATTACGACATGGATTATCACGGCGCATCTGGCACCGGGAAGTATGCAAGATT  
TGATTTCCAAAAGTACATCGAAAGATCACTTGAAGAGGATTTTAAAACCTGTTGTGGGAATAAGCCCAGTCAATATGGTTCT  
TTGCGGTGCTATTTCTTCTGACAAATACTCATGGGTGGTATTCTTATTATTGGCTTCCATTATCCCATTTTATTATAATC  
TTAATAGTGGGTGCTAAACTTCAAATGATAATAACAAAGATGGGACTGAGGATTACAGACAGAGGAGAAGTTGTCAAAGG

TGCACCTCTGGTTGAACCAGGAGATGACCTGTTCTGGTTCAACCGTCCACGCCTCCTCCTCTTTTTGATTTCATCTCGTGC  
TCTTTCAGAATGCTTTTTCAGCTGGCATTTTTTTCTTGGAGTACTTATGAATTCTCCCTACACTCTTGCTTCCACGAAACA  
ACTGCAGATATTTGTCATTAGACTTACAATGGGGGTTATCATACAAGTTTTATGCAGCTATGTGACACTACCTCTATATGC  
TCTAGTCACACAGATGGGTTCAACCATGAAACCTACCATCTTCAATCAGAGAGTGGCATCAGCACTGAAGAATGGCACA  
ACACTGCCAAAAAGCAAGTAAAAAGCAGTAAGCCAACCAACCATTAAGCAGGCCATCAACGCCAACCTATGGTATG  
TCTCCTATGCATCTGCTGAAAAACACCTTGGCTGGTAGAAGTGATAGTGCACAAAACATCTCCTAGGACATCCAACATGA  
AAATGAACAATGGGATATTGAAGGATCACCTTCCAAAAGCAACCATGCAGCTGGTGAAGAAACTCAAATGCAAGTTATGG  
AGTCAGGCTCAAGCTCAGCACCAGAATTGCCTACAAGCTCTCAGCTTGAAATCAGAGTTAGTTTCATCAGAGTTTTCTTT  
GAGAAGAGACATCTTGGTGCAGAGACGAGAAGTGAAGATGATAGTTTTTTATTAA

>VrMLO2 JJMO01000125

ATGGCAGGTGGAGGTGGAGGAAGAACTTGGAGGAAACACCCACATGGGCCGTCTCCACTGTCTGTTTTGTTTTGATCTT  
AATATCTATAATCATCGAACATATCATCCACCTCATCGGAAAGTGGTTGAAGAAGAAGCACAAAAGAGCGCTGTACGAGT  
CACTGAAAAAGATCAAATCAGAGCTTATGTTGCTGGGGTCTTATCGTTGCTTTTTAACGGTGGGACAAGGTCTGATATCA  
AGAATATGTATATCAGAGAAAGTTGCATCAACATGGCACCCCTGTAGCCACGAAAACACAGACACTACTGAAGAGTCTGA  
ACAGGGAACCAACAGCCGAGGTTGTTAGCGGCGTCCATGGTTCAAACGAGGTAACCTTACGCCGTGTTTTGGCTGGAG  
GAGGAAGCGACAAGTGTGGCGAGGGTAAAGTGCCGTTTTGTGTCATCCGATGGCATCCATCAACTCCATATATTTATCTTT  
GTGCTAACTGTTTTTTCATGTTTTCTTACTGCATTACCACCATGGCTCTAGGAAGAGCAAAGATGAAGAGATGGAAAAGATG  
GGAGGAGGAAACCAAGACACCAGAGTACCAATTTTACATGATCCTGAACGATTTAGATTTGCTAGAGAAAACATCGTTT  
GAAGAAGGCATTTGAGTTTTCTGGACCAAAAACCCCTGTCTTATGTGGATTGTTTTGTTTTCTTTAGGCAATTTGTGAGATCA  
GTACCTAAAGTGGATTACTTTGACCTTAAGACATGGATTTATCATGGCACATTTGGCTCCTCAAAGTCACTCCAAATTTGA  
TTTTCGGAAATACATAAAAACGATCACTGGACGAGGATTTCAAAGTGGTTGTGCGAATCAGTCTCCTCATTCTGGTTCTTCG  
CGTGCTGTTTTCTTCTTGAACATCATGGCTCGTACTCTTATCTGTGGCTGCCATTTATTCTTTGATCATCATTTCTG  
TTAGTTGGAACCAAGTTGCAAGTGATCATAACTGAGATGGGCTAGAAATTCACAAAAGAGGAGAGATTTCAAAGGGAGT  
GCCAATGGTACAACCCAGGGATTATTTGTTCTGGTTTTAACCGACCTGCTCTTATTCTTTACCTTATTAACCTTTGTGCTCT  
TTCAGAATGCTTTTTCAGCTGGCTTTCTTCTCATGGTCTGTGCTTCAATTTGGGATTAAGTCTTGTGTTTTCCACGCACATACT  
GAGGATGTAGTGATCAGAATCTCAATGGGGGTCCTTATTCAAATCCTGTGCAGCTACGTCACTCTTCTCTATATGCTCT  
GGTGACACAGATGGGTTCAACGATGAAGCCAACGATATTCAACGAAAGAGTTGCGGAGGCACTGCGGAAGTGGCACCAGA  
CAGCGAAGAAGCAAATAAGACAGAACCGTGTGGGATCCTTGTCTGTTGTGCGGGACACCCATGTGAGCAGACCCACGACC  
CCGAGCCACCACATGCTCCAAATGCACCTCTTGCCTACTACCGTCTGAAATAGACAGCTTCCCCGCCTCTCCACGGCG  
TTCGAACTTCGACGGCGACCACACTCAGCCCTGGGAAATCGATTCCCCTTCTCCTTCTGACTCGCAGCACGAAGTGGAAA  
TGGGTCCCACCAATGACCCCAATACTAACACAAGCCAACATGAAATTTGTTACGATTGCACACACCAAGGAATTTTCTTT  
GATAATAGACCTACCACCTGCCACGTAG

>VrMLO3 JJMO01000125

ATGCTTACACATCACAATTTATAGTTTTGTCTTCTCTTTTCTCAAGATCTTTGGCAGAAAGTGTAGAAAATTAAGGAATCA  
AAGGCTTGTCTTATGGAAATAGGAGAAGAAAGATCCCTGGAAGAACTGCAACATGGGCTGTATCAGTTTTTTGCTTCT  
TCTTCTTCTAATATCTTTGATCATTTGAGGGTAGTCTCCACAAGTTGTCTGAGATTTTAAGGAAAAGGAAAGGAAAATCA  
CTAGGGAGGGCATTGACTAAAACCAAAACAGAAATGATGAAATTCGGTTTTCATGTCTCTTTCTTCTCACCATCATGTGCGA  
AGTGCCAAATATCGAAAATATGCATCAACAAGGATGTGGCAACATATTTTCTGCCATGCAAAGATGCTGCAGAATTAACAG  
GGTTTTCAGTACTCATACTCAACCTCACAATTTGACGTAGCACCTGCAACAACGAATCTGAAGTTGAGGTCAACTAT  
TGTGAAGCAAAGGATAGGTTAGTTTTAATTTCAAGTGATGGAATCCTGCAACTGAATATATTTCATCTCCTTTCTGGCTGT  
GTTTCACATCTTGTCTGTACATTGACAATGTGCCCTCGGGAAGGCAAAGATGAGAAGATGGAAAAGATGGGAGGAGGAGA  
CTCGAACACTGGAATATCAGATAGCTAATGACCCAAGAAGGTTCCAATATACAGGTCAAACAATGATTGGAAAACGTCAT  
TTGAATTTCTGGAGTTATCATTTCTCCCTTGCTTTGGATGGTTTGGCTTTGTTTGGCAGTTTTTATGTCTCAGTCTCAAAA  
TGATTACTATACTCTACGAAATGGGTTTCAATGCAGCTAATATTTCTTTAGGCAGCAATTTCAACTTCAAGAAATTTCTTT  
CCCGCACTTATGATGAAGATTTGAGAAGGTTATGGGAATCAGGATTTGGATCTGGATTTTCTCCATACTTTTCTATCTTT  
TTTAGTGACATGAGTTCTATAATTACTACTGGCTTCCATTTATTTCCACTTATGGTTGCTTTACTAGCTGGGACAAAAC  
CCAAGTCATAATAACAAAGATGTGTGTAGATAGTTGCAAGGCAAACCCAGTGATCAAAGGAAGTCTACTAGTAACACCCA  
GTGATGCCATTTCTGGTTTTCATAGACCTGAATGGCTTCTGCATTTACTCAAGTTTCTCCTTATCCAGAACTCCTTTCAA  
CTTGCAATCTTACCTGGACTTGGTATGAATTTGGTCCAAGGCTTGTCTTCAATAGAGAAAATGAGGACATTGGCATAAG  
GATTGGAATGGGTATAGCTGTGCAGCTTCTTTGTGGTTATGTCACCCCTTCCCCTTTTTGCACTTGTACTCAGATGGGTT  
CTAGCATGAGGAGAGAAATTTTACCAGAGAGTGTCTTATGGGCCTCAAAAATTTGGCACAAGGGGCTAAAACAATCTCTG  
CAGAACAACCTCAACTTCAAGAAAACACTCAGACTCTTTGCATTTCAAAGGAGGTGACAATTCAGCAAGAGGAAACAATGCA  
TAGTTTGAACAACCCAGATATTTGTAGTGTCTCAAAAACACCCCTTCTCCCTCTAATGAGGGAGAAAAGCATTGCTCCCACCA  
ATAATGAGCAAGATGTATCAAGTCTTTCGACTTCAGAAATCAGACTACTGAGGAAGAGAATTCAGATCATCACCAGA  
GGAACCTATGACGGTGAGATCTCATTTGGTAGCAGCTGGAAGAATGTAGGAAGTAGCAGAGGCATTGGAGAAATTTGTCTC  
AATAACTGAAGAAGATGACGTTGAAAAATTACCTGAATTTATCCATAGATAA

>VrMLO4 JJMO01000126

ATGGCAACACCCAGTTATTCTTTACAGCACACTCCAACATGGGCTATTGCCCTTGTTCCTTCACTTCTTATCTCAATCTC  
AATCATCTTGGAGCATTTTCATCCATCTCATAATCAAATGGCTCAGGAAACATCGAAAGAGCGATTTGGTGGAAAGCAATAG  
AGAGGCTTAAATCAGAGTTGATGATCTTAGGATTCATGTCGCTGTTGTTGACAGTAACACAAGACGCCATAATAGAAATC  
TGCAATCCAGTGAGGGCTGCAGATACTATGCTTCCATGTGCAAAACGTAAGTCCCAATGATACTGCAATTTTGGATTCTTG

CAGTGCCAAAAGTGCTAGTGTGAGGTTGCTTTAGTGTCAAAACATGGAATCCATCAACTTCATATGTTTCATTTTTGTTTTAG  
CTGTTCATGCAAATTTGTGTACAGTATTTCTCACCGTTTCTCTGGCAAGGGCTAAGATAAGGCACTGGAAAGCTTGGGATGAA  
GAGACTCAAACAATTTGAATATGAAATGGCAACGACCCTAATAGATTAGATACGCAAGGCAAACAACATTCGGAAGACG  
CCACATATCTACTACTACTGCATCACCAGTGTCTGTTTGGATTAAATGTTTTTTCAGACAGTTCTTTTCATTTCAGTAGAAA  
AAGTTGATTACCTCACCTTGAGGCATGGTTTTCAATCAGTCACTTTTCTGCTAGAAAACAGCAACTTCGACTTCCAAAAG  
TACATTGAACAGTCACTTGAGGAAGATTTCCAGATCATAGTGAGCATTAGCCCTGTGATGTGGTTCACTGTTGTTATTTT  
TCTGCTCGTGGATGTACATGGCTGGCATGTATATCTCTGGTTATCCTATATTTCCCCTCTTGCTGGTTCTGGTTGTAGGAG  
CTAAACTTGAAGTCATTGTAGACGAAATGGCTCTTCAGATGAAAGATGTCAACAGTGTAAACCAAAGGGACCCCACTTGTT  
TCTCCAAGTGATGAATTTCTTCTGGTTTGGCCATCCAGGATTTGTGTTAACACTTCTGCATTACACTTTATTTGTGAATGC  
ATTCGAGCTTGCCTTCTTTATATGGGTATCAACACAGTTTGGAAATAAATTTCTTGCTACCACGAACACAGAACATTTACAG  
TCATAAGGGTGGTGATAGCGGTAGCAGTTCAAGTCCATGCAGCTATGTAACCTTCCCCTTTACGCACTAGTGGCACAG  
ATGGGGTTCACAGGTGAAGAGCAAAGCCTTGGCTAAGATTCTGAGGCAGTGGCATGTTGAGGTGAGGGAGAGAAGAAGGAA  
GCAACAGAACTTGTGAAGTCTTTTAGTTTTAGCCATATGTCTTCAGAATGGAACCAAGGAAATAAGAGTGCCCTTGAGT  
TTTCTTCAGGGCTACGTGAAAACGCTCGTTCCCTCTAGTGAAGGAGAAATTTGTAGAAGCGTTGGAGCATCCGATGATAACA  
CAGGCAAACCTCATCAAGTGATCCACCTCCTAGTGTGTCTAA

>VrMLO5 JJMO01000120

ATGGCAGGAAGTGGAGGAAGAAATTTGGACGAAACACCTACCTGGGCGGTGGCCACTGTTTGGCTTTGTTTTGCTCTCTGT  
ATCTATCATCATCGAATACATCTTCAATCTAATAGGAAAGTGGTTGAAGCAGAAACACAAAAGAGCTCTGTACGAGTAC  
TTGAAAAGATCAAATCAGAGCTTATGCTATTAGGGTTCATATCGTTGCTCCTGACGATAGGGCAAGGTCTGATATCGAGA  
ATATGCATATCAGAAAATGTTGCAGGGACGTTTACCCTTGCCTTACAGAAGGGAGGAGAAAAAGTACCCCCGCCATT  
AGAAGACGACTATTACCACCATAACCGCCACATTTTAGCGGGCAAGCAGGTTACGACAAGTGTGCCGCCCAGGGTAAAG  
TCCCATTTGTCTCATCGGAGCCATTCATCAACTCCATATATTTATCTTCGTGCTAGCTGTTTTTTCACATCCTTTACTGC  
ATTCTCACTCTGGCTCTGGGTAGGGCAAAGATGAGAAGGTGGAAACGATGGGAAGTAGAAACCAAGACAGCAGAGTACCA  
ATATTACACAGTCCCCAGCGATTTCAGATTTGCAAGAGAGACATCGTTTGGAAAGAAGACACTTGAGTTTTTGGACTCAAC  
ATGTTGTCTGGTTTGGATAGTTTTGTTTCTTCAGACAGTTTGTACGCTCAGTTTCTAAGGTTGATTACTTGACCTTGAGG  
CATGGATTTATGATGGCGCATTTGGGGCCACACAGTACCAGAAATTCGACTTCCGGAATATATTAAGAGATCTTTGGA  
AGAGGACTTCAAAGTGGTCTGCGAAATCAGTCTCCAATCTGGTTTATTACAGTGTTTTTTCTCCTGTTTAACTCACG  
GCTGGTACTCTTATCTGTGGCTTCCATTTGCTCCTTTGATTATTGTTCTATTAGTGGGAATGAAGCTGCAAGTGATAATA  
ACGAAGATGGGTCAAAGAATTCAGAACGAGGAGAGGTTGTAAGGGGCATGCCTCTGGTGCAACCAGGGGATCACCTCTT  
CTGGTTTAAACAACTCGACTTATCTTATACCTCATTAATTTTGTGCTCTTTTCAGAACGCTTTTCAGCTTGCTTTCTTTT  
CATGGGCTGCGCTTCAATTTATGATGAAGTCTGTTTCTTTCCCAAAGAAGGAGGTGGTGATCAGAATCTCAATGGGG  
ATCTTCGTTCAATTCCTTTGCAGCTACGTCACTCTTCTCTACGCTCTCGTGACGCAGATGGGTTCAACGATGAAGGC  
AACGATATTCAACGAAAGAGTAGCGATGGCTCTGAGAAATGGCACCACACAGCGAAGAAGAACGTAAGAGAGAAGCGTG  
GATTACGATCGCAGAGTCCATTGTCAACGAGGCCCTTCAACACCGAAGCATCCTAAGTCAAGGCTAATCTGCTGCGACGG  
TATCACAGTGAATGGCCACTTATCCATCTTCTCCTATAAGGTTTCGATTTTGGAGCACATCTTCTTATGGGATCCATTC  
ACCTCCTTCGTCCAAGGTTAATGCTGCAGCTACTTCTTCCATTGATCAGAATGAAATGGAGATGGAGGTGGAAATGGAAA  
TTGACATGGATCAGGCTCTCAGATCTCACTCAACACCACATTGATATCCAAGACAAGCAAGGATTTTCTTTTGATAAAAAGA  
TGA

>VrMLO6 JJMO01000120

ATGGAAGGAAGAAGCTTGGAGAATACTCCGACTTGGGCTGTGGCCGTTGTTTTGCTTTCGTTTTGCTCTCGGTATCTATCAT  
CATCGAATACATCTTCAATATAATAGGAAAGTGGTTGAAGAACAAGCACAAAAGAGCGCTGCATGAGTCACTTGAAAAGA  
TCAAATCAGAACTTATGTTATTTGGGGTTCATATCGCTGCTTCTAACGGTAGGACAAAAGTGAATATCGAGGATATGTATA  
TCAGAAAAGGTCGCCGGAACATTCACCCCTGCCTCACCAAAGCGACCACAAAACCGATGCCCGGATATTAATATCGGA  
GCTTTTTCGGTTCCGATCATGGCCAAAATCAACGCCGATTTTGGCTGCCGGAGGAACTGACAAGTGCAGCGGCTCAGGGTA  
AAGTTCCGTTTGTCTCATCAGAGGGCATTTCATCAACTTCATATATTTATCTTCGTGCTGGCTGTTTTTTCAGTTCCTTTAC  
TGCATTTCTCACTCTGGCTCTTGGTAGAGCAAAGATGAGAAGATGGAAACGATGGGAAGAAGAAACAAAACAACACAGTA  
TCAATTTTTCACACGATCCAGAACGGTTTAGATTTGCAAGAGAAACATCGTTCCGAAGAAGACACTTGAGTTTTCTGGACTC  
AAAATACTGTCTTGTGGATTATTTGTTTCTTCAGGCAGTTTCGTACGCTCAGTTTCTAAAGTTGATTACTTGACCTTG  
AGGCATGGATTTATGATGGCACATTTGGGGCCTCAAAGTGCACAAAATTTGACTTTCCGGCAATATATTAAGAAACTTT  
GGAAGAAGACTTCAAAGTGGTGGTTGAAATCAGTCTCCAATATGGTTTCATCACAGTGTCTTTTCTCCTGTTTTCACACAC  
ATGGCTGGTACTCTTATCTGTGGCTGCCATTTGCTCCTTTGATCATTGTTCTATTAGTGGGAACCTAAGCTGCAAGTGATA  
ATAACGAAAATGGGTCAAAGAATTCAGAACGTTGGAGAGGTCGTAAGGGTGTGCCACTGGTTCAACCTGGGGATGATCT  
CTTCTGGTTTAAACAACTCGACTCATTTCTTACCTCGTCAATTTCTGCTCTTTTCAGAACTCTTTCCAACCTCGCCTACT  
TTTCATGGACTGCGCTTTCAGTTTGGGATGAAATCTGTTTCCATTCGACAGCGGAGGATGGTGTATCAAAAATCTCAATG  
GGGTTTTTTCGTTCAATTTCTGAGCTACGTAACCTTCTCCTCTATGCTCTCGTACACAGATGGGTTTCGACTTCAAG  
GCCAACCATATTCACGAACGAGTAGCCATGGCTCTGAGGAATTTGGCACCACGGAGCCAAGAAACACGTAAGCAACAGA  
ACCGTAGATCACAGTGCAGGCCCTTTGTCAGGGCCCAACCCCCGATCATTCTATGTCTCAGGCCATCTCTTACGC  
CGTTGGCACAGTGAATGGACACCTATCCCCTGACTCTGAAGCCCATCGTCCCTGTGAGATCGATTTAGGCCCATCATC  
CAAGGTGCATCATCAGGAAATGGAAATGGATCAGCTGGACCATGGCCACCACAAAATGTCAATGACCAGACTCAACACG  
AGATTAATATTTGAACATGGCAAGGAGTTTTCTGTTTGATAATAGATGA

>VrMLO7 JJMO01000121

ATGGCCGGTGGAGCATCCGGCGGAGAAAGAACGTTGCAGGAAACACCCACATGGGCAGTGGCTGCTGTTTGGCGAGTCTT  
CGTTATTCTCTCTGTGTGATTGAACAGGGAATCCATTTACTTGAAGAGTGGTTTAAAAAACGACATAAGAAAGCCATGA  
GTGAAGCCTTGGAGAAAATCAAAGCAGAGTTAATGTTATTAGGATTTATATCCCTGTTACTTACTTTTGGTACACAATAC  
ATTGCAAAGATATGCATCCCTGCATCAGCTGGTGTATCATGCTCCATGCAAGAAGGTGGAAGCGTCAAAGGACCCAGA  
TGATTCAAAATGGCGGAAGGAAGTTACTTTACTTTTGGAGGACACATGGAATGGCGTCCAGTTTGTAGCAACTGCGTCTTCTG  
GTGGTGTATTATGCTCACAGAAAGGTAAAGTGCCATTGATTTCTCAGTCAGGGGTGCACCAGTTGCACATATTTATCTTC  
GTCCCTCGCTGTTTTTACATATTTCTACAGCGTAATGACCATGGTACTAGCCCGAGCAAAAATGAAGAAATGGAAAGCTTG  
GGAAGCTGAAACATCCTCTCTCGAGTATCAATTTACAAATGATCCTTTCGAGGTTTCAGGTTTGGCGATCAAACATCGTTTG  
TTAGGCGTCACTCTGGTTGGTCTAGGATGCCAGGAATTCGATGGATTGTAGCATTCTTCAGGCAATTCTTTGGTCTGTC  
ACCAAGGTTGATTACATGACCATGCGGCATGGATTTATTAACGCACATTTTGCTCCCAATAGCAAATTTGACTTCCAAAA  
GTACATTAAAAGATCCATGGAGGACGACTTTAAAGTGGTCTGGGTATAAGTATTCCGTTATGGGCTTTTCGCTATCGTCT  
TTATGCTGGTGAACGTTTACAAATGGTACACTCTCACCTGGCTATCGTTAGCGCCGCTAGTGATACTTCTATTAGTGGGC  
ACCAAGCTTGAACCTATAATCATGGAAATGGCCCAAGAAATTCAGATCGAACACAAATTGTGAGAGGAGTCCCTATTGT  
AGAGCCTAACAAAGTATTTTTGGTTTAAATCGGCCCCAGTGGATTACCTTCTTAATCCACTTTACCTTATTCGAGAATG  
CATTCCAAATAGCCTTTTTCTTGTGGACATGGTATGAATTCAGATCACATCTTGCTTCCATGAAAACCTTGGCGCTGATA  
CTGACAAGGTTTTCTTGGAAATAGTCTTGCAAGTCTGTGTAGTTACATTACATTTCTCTACTCCCTAGTAACACA  
GATGGGATCTCACATGAAAAAGCAATTTTTGAAGAGCAAACCTGCAAAGGCATAAAGAAATGGCAGAGGGTTGCAAAAAG  
ACAAGAGAAAGTTGAGAAAAGCAGGGGTAGATGTTCTTTCGGGAACAATGAGTGGGGAAGCAACACCAAGCCAAGGATCA  
TCACCAATACATTTACTTTCACAAGTACAAGCCTAACCAACAGACACTGATACTGTTCTTTATTCTCCACGATCATAACA  
ATCTGATACCGACTTGTCTGACACAGAAGGATCATCGTACCAATTGAATGAAATAATACAGACACAGACACCTCAAGCTC  
CAAGAAATGGAGAACCTCATATTACCGAATTTTCTTTGTAAGCTTTAAAAGTGAACAATTTTGA

>VrMLO8 JJMO01000121

ATGTCGGGAGGAGGAGCGGTGACAACAGGCAGCTAGATCTCACGCCAACATGGGCCGTGGCTGCGGTTTTGTGCAATCAT  
CGTCATCATTTCTATACTCTTGGAAAAAATCATACACAAATTCGCAGCGGTGTTTTGAAGAAAAAAGAAACATGCGTTGC  
TAGAAGCTCTTGAAGAGATTAAGCCGAGCTTATGGTTTTGGGATTTATTTTCGTTACTTTTAAACGTTTTGGTCAAAAAC  
ATTTCTAAAGTGTGTATTTCCCAAAGGTATGCACACACAATGCTACCGTGTCTTCCCTTGAACAACGAGGAGGGGGCGC  
GGCAGCTGAACACGGAGCGGGTGGCGGTGAGGCTGAAGGAGGTAGCCATCATCGCAGACTTTTTTTCATACGAGCGTAGAG  
TTCTATCTGGTGGTGGTGGAGGCCAGTTGTAACCGGGTCTTGCCTCTTATATCAGTGAGCGGGTTGCATCAGTTA  
CACATTTTTATATCTTCTTGGCTGTCTTTTTCATGTGATCTACAGTGCCATAACAATGACCCTTGGAAAGAGCAAAGATTG  
TGGGTGGAAGGCATGGGAGGAGGACCATGTCGTGGATGAAGATGCCCTGAATGATCCTAGAAGATTGAGACTTACTCACG  
AGACATCATTTGTGAGGATCACAGCAGTTTCTGGACTAAAACACCAGTTTCTTCTATTTTTGTATGCTTCTTTTCGACAA  
TTTTTCAGATCTGTTTCGTAGGGCTGACTACTTACCATGAGACATGGATTTGTTTCTGTCCATTTAGCACCAGGAAGTAA  
GTTTCGATTTTCAAAAATATATCAAGAGGTCAATTAGAAGATGACTTTAAGGTAGTTGTAGGAATCAGTCCGATACTTTGGG  
GATCAGTAGTGTATTCTTGTCTCGTGAATGTTTACCGGATGGCATGCTGCCTTTTGGGTGTCTTTTCTCCCTCTATTGGTG  
ATTTCTGGCTGTTGGAACAAAACCTTCAAGCAATTTACTCGGATGGCATTGACATAAAAAGAAAGGCATGCTGTAGTGCA  
GGGATCCCTCTAGTGCAGTGTCTGACAAATTTTTGGTTTTGCATGGCCTCAGTTAGTTCTTTATCTCATCCATTACG  
TCCTCTTTCAGAAATGCTTTTTGAGCTGACATACTTCTGGTGGACATGGTATGAATTTGGTTGGGCATCTTGTCTTTACGAG  
GATGATAAACTCATGATCGTCAGAGTAGCTCTTGGCTGGGAGCTCAAGTCTTTGAGTTATGTCACACTTCCACTTCA  
CGCACTGGTTACTCATAGTGGGTCGACGATGAAGAAGTCAATATTTCGATGACCAAACATCGAAGGCCTGAAACAGTGGC  
ATAAGAAATGCTCTGAAGAAGAAAACGTCAAAAGGACGCCAGGAAACTCGAACGTTGGGTGGGAGCCCGGAGAACATACA  
CCGGGACATTTCTTCCGCGCACCCACCACCACCGCACAAAGACACGGAATGGCTTCTCAGACCGCCACCATCGTCACCAG  
TGTTGATAACGAAACCTATGATAAGCGGGACCTTCTGAGTGGACCGTGA

>VrMLO9 JJMO01000121

ATGAGTGGCGGAGGAGAAGAAGGAGAGAGTCTGGAGTTCACTCCCACTTGGGTGGTGGCCGCCGTATGCACAGTCATCGT  
CGCCATCTCCCTCGCCGAGAGCGCTTCTTTCATTTTGGCGGAAAGTATCTCAAAGCTAAGGACCAGAAGCCGCTCTACG  
AAGCACTGCAGAAAATTAAGAAGAGCTCATGCTTTTGGGTTTTCAATTTCCCTCCTTTTTGACGTTACACAAAACGGCATT  
ACCAAAATCTGCGTTCCCCCGGCCCTTACGCGCCACATGCTTCCGTGTAGCCTTGACCTCGCTCCCAAACATGAATCTCA  
TTTCCAAACATTTTATTTCCCGGAACACCCAGACGCTTCTCGCTGCCACTGCGGCGGAACACGCGCCGCCCCACTCCG  
AGGCTGAGGCGACCGAGACTGGAACCGAGACTGGGTTCTGCGCTCGCAAGAATAAGGTGCCTTTGTTGTCTGTGGAAGCA  
CTGCACCACCTCCACATCTTCATTTTTGTATTGGCTGTCTGACACGTCGCCTTTTCCGTACTCACCGTTGTCTTTGGAGG  
TGCCAGAATTCGTCAATGGAAACACTGGGAAGATTCAATTGCAAAAAAGAACTACGAAACCGACCGAGTTCTGAAACCAA  
AGGTGACCAATGTTTACGAGCATGATTTTATCAGGGGCCGTTTTTCTGGTTTTGGGAAAGATTCTGCTATAGTCCGTTGG  
ATGATATCCTTTTTCTAAGCAATTTTATGGATCTGTGACAAAATCGGATTTATGTGACGCTAAGACATGGTTTCATTATGAC  
CCACTGCAAGTCAAATCCAAAGTTTAAATTTTACAAGTACATGATTCGTGCCCTTGAAGATGATTTCAAGCAAGTTGTTG  
GTATAAGTTGGTACTTTTGGCTTTTGTGGTTATCTTCTTGTGTTCAATATCAACGTTTGGCATAACATATTTCTGGATT  
GCTTTTTATCTGTCTTCTTTTGTCTTGTGCTTGTGCTTGTGCTTGTGCTTGTGCTTGTGCTTGTGCTTGTGCTTGTGCT  
TGAAAAGCATGCAGCCATAGAAGGTGACTTAGTTGTGACGCCATCAGATGAACACTTTTGGTTTTTCATCGGCCTCGTGT  
TCCTCTTCTTAATTCATTTTATCCTTTTCCAAAATGCCCTTGGAGATAGCATTTTTTTTTCTGGATATGGGTTACATATGGG  
TTTACTCGTGTATAATGGGGCAAGTTGATACATTTATCCAAGGCTCGTTATTGGGGTATTTATTCAGGTATTATGTAG  
CTACAGCACCTGCCACTCTATGCAATAGTTACGCGAGTGGGAACTCACTATAAGAGGGCAATATTTAATGAGCATTGTC  
AACACAACATTTGTTGGTTGGGCACAAAAGGCGAAGAAGAGGAAAGAACTAAAAGCTGATGGCCGTCTTGGCCAAGGAAGT

TCTCAGGAGAGTGCTAATACAGGAATCCAGCTTGGCTCAATTTTCACGAAGAAGGCATCTGCTCCAGGCGACACTTCTTC  
TGCCCCAAAGATGACGGAACCAGCTGA

>VrMLO10 JJMO01000123

ATGTCTGTCTCAAAATACAAAATACTGTCTCTTTGTCTGGTTTCATGGCTGTGGTGCGGTTATGTGGCTGTGGCTTCAAG  
TGAGAGTAGTATCGGTTCCAAAGACCTTGATCAGACACCAACATGGGCGGTTGCCTGTGTCTGCACTGTTTTTCATCTTGA  
TATCCTTAACTCTGGAGAAAAGCCCTTCAAAAAGTGGGAACGTGGCTACATGAAAAGCACAAGAAGGCTTTGCTTGAGGCT  
TTGGAAAAGGTCAAAGCTGAGTTGATGATTCCTTGGTTTTCTTTCACTGCTTCTTACTTTTCGGGCAGAGTTACATTGTCAG  
AATATGTATTCTACTGATATTGCAGACAAAATTGTTGCCATGTCCGCTTGCTGGTACCGAAGAAGAATCAAGTAGTGAAG  
AGGAACACCGTAGGAAGCTTCTTTCTTATGAACGCAGATATTTGTCAGGTGACGCTACCAATTACCAATGCAAGAAGGGA  
CAACAACCCTTATATCAGTCAATGGATTGCACCAGTTACACATCCTCATATTCTTCTTAGCAGTCTTTCACGTGTTTTA  
CAGTGTGTAACAATGCTTCTTGGGAGACTAAAGATTTCGAGGATGGAAGGCATGGGAGGAGGAGACTTCATCTCATGGAT  
ATGAGTTTGCCAATGATCCCTCAAGATTCGGCCTTACACATGAAACATCATTTGTGAGAGCTCATGCTTCTTTTTGGACA  
AGATATTCAATCTTCTTCTATATAGGATGCTTTTGTAGGCAATTTTATAGGTCTGTAGGCAAGGCTGACTACTTGGCTTT  
GCGCAATGGATTTATCACTGTACACCTGGCTCCTGGAAGTAAATTTAACTTCCAAAAGTATATCAAAAAGATCCTTGGAGG  
ATGACTTCAAGGTTGTTGTTGGAGTCACTCCGATTCTCTGGGCTTCATTTGTTGATTCTCTGCTACTAAATGTTAATGGA  
TGGCATGCTATGTTCTGGGCATCCTTAATTCAGTTGTGATAATTTTGGCTGTCCGGAACAAAAGTCAAGTGCCTCGC  
AAAGATGGCTATTGAAAATAACAGAAAGACATGCAGTTGTCCAAGGAATTCCTCTTGTTC AAGGCTCAGACAGATATTTTT  
GGTTTGGTCCGGCTCAGTTAGTTCTTCATCTTATCCATTTTGGCTTGTTCAGAAATGCTTTCCAAAATAACATATTTCTTG  
TGGATATGGTATTCTTTTGGACTGAAAAATGTTTCCACGCTGACTACAAGCTTGCAATAGTGAAAAGTAGCATTAGGGCT  
TGCGGCACTATGCCCTCTGCAGCTATATCACCCTTCCATTATATGCTCTTGTACTCAGATGGGCTCAAGAATGAAAAAAT  
CAATATTTGATGAACAAACATCAAAAGCATTAAGAAATGGCACATGGCAGTAAAAAGAAGCAGGGAGTAAAACTTGGGA  
AACTCCAAGGTGCGAGCCATGGATGGAAGCACCCTGATTCAACAGTACACTCTTCTGGCCCCAAACTTACCCTTTCAA  
AACCATGGTCACTCAACTCGCACCATGTCCAGCTATGATGAGCATGAAGCAGAAGAAGCTGAGCATCACCCAACAGCCAACAATCAA  
CAGCAAACCTTGATTGTAAGAGTGGACCATGATGAGCATGAAGCAGAAGAAGCTGAGCATCACCCAACAGCCAACAATCAA  
GAGCTATCACGTTTGCCAACCTTGAAGAAGCATGAAATAG

>VrMLO11 JJMO01000128

ATGGGAGAGGAAGTTTTACAGAGGAAGTTGGAGACAACCTCCTACATGGGCTGTTGCAATTGTGTGCTTTGTGCATGCTCGC  
TATTTCAATCCTCATTTGAACATATTTATGAAGAAGTTGGAAAGTGGTTGAAAAAGAAACACAAAAAGGCTCTTCATGAAG  
CGCTGGAAAAGGTTAAAGGAGAGCTTATGCTGCTGGGATTCATATCCTTGCTCCTAGTGGTGTGTTGAAGATCGAATTACC  
TCTATCTGCATCTCAGAAAAGTGTGCTTCCACTTGGAAATCCTTGCGATCCTGATTATAAGAGTAAAGGTCCAGAAGGATA  
TATTGACAAATGCGCACAAAAAGATAAAGGAAAAGTTGCTTTTATCTCTGAATATGGGATTACCAGCTCCATATATTCG  
TCTTTGTGCTTGTATCTTTTACATCCTACAGTGCATCATGACACTGACTTTGGGTAGAACTAAGATGTCAATATGGAGG  
AAGTGGGAAGACGAAACGAAGAGTCTTGAACATCAGTTCTACCATGATCCTGAGAGGTTTCCAGTTTGTAGGGATACAAC  
GTTTGGACGAAGGCACTTGAACCTCATGGAGTAGATCACCAATTTCAATTATGGATTGTTAGCTTCTGCAGACAATTTCTATG  
GATCAGTTAATAAAGTTGACTATATGGCATTACGACATGGATTTCATAGTGGCACATTTGACTCCAGCAAGTGAGACGAAA  
TTTGACTTCCAGAACTATATAAAAAGAACACTTGTATGAGGATTTTGCAGTAGTAGTTGGAATAAGTCCAACCATTTGGTT  
CTTTGCAGTGTAAATCTGCTCACAAATACTAATGGGTGGTATTCTTATTTGTGGCTACCATTTATCCCCTAATTTATAA  
TCTTGTGTTGGTGGGAACAAAGCTACAAATGATCATAACAGATATGGCATAAGGATTCAAGATAGGGGGGAAGTGGTCAAG  
GGTGCACCAGTGGTTGAGCCAGGAGATGAATTTGTTCTGGTTTCACTCGCCCTCGCTTCTCTTTCTGATTTCATCTCGT  
TCTGTTTCAGAATGCATTTTCAATTGGCGTTTTTTGCTTGGAGCACTTACGACAATAAGTTCAAAAATAAACAATTGCTTTC  
ACCGCACTACTGAAGATATCGTCATCAGACTTACAATGGGGGTTCTCACCCAAGTTCTATGCAGCTACGTGACTTTGCCT  
CTTTATGCTCTAGTCACACAGATGGGTTCTACGATGAAACCCATCATTTTCAAAGATAACGTGGCATCAGCACTGAAGAA  
CTGGCATCACACTGCTAAAAAGCATCTAAAACACAACAAGGATTCAACTTCTAACACCCCATTCTCAAGCAGACCAGGAA  
CTCCAACCTCATGGCATGCTCCGGTGCCTTGCCTTACATGCACCCTAGACACAGTATAGTCCACTGGTTTTCTCCAAGA  
GCATCCAATTTATGAAAATGGTCAATGGGATGTTGAAGGGTCACTTCCCAAGCCACCATGCAAGAGATGTTGACCATGA  
AGAGAGCATGATGATGCAGCCTCAAGCAGCAGAATTCCTCCTTCTGGACCCAATCCTATTGCAACTCAACATGAAATCA  
ACATTGCTTTTATCTGAATTTTCAATTTGGGAGGGGACACAACCCCAGTAGAGCAGATGAGTATTAG

>VrMLO12 JJMO01000129

ATGGGTGGTGGTGGTGGTGGTGAAGAAGGGAACAACCTTGAATTCACCTCCACTTGGGTGGTTGCTGTTGTTTGTCTGT  
GATCGTTGCTGCATCGTTTGTGCTGCAGAACGGTTTCTTCACTATGGAGGGACGTTTCTCAAGAAGAAGAATCAGAAGCCGC  
TGATGAAGCTCTGCTGAAGATCAAAGAAGAGTTAATGCTGTTGGGATTTATTTCTCTGCTGCTGACTGTGACACAAAAT  
GGAATCATCAAAATCTGTGTTCCCTGAGGGTTGGACTCACACATGCTTCTTGCAGTCTTAAAGGATAAAAAAGAGAAAAGA  
ATCAGCAAACTCACAGAACATTTTTCAGACTTTTTTCTTTTCACTATATCTTCCAGTCAATTTTCCAGTCTTGGTCTG  
ATAATGAAGATCACCAACACAGCTGCTGAAAAAATTTGGCACTGTGCTAAGAAGGGCAAGTTTCTCTGTTATCTGTG  
GAGGCATGCATCATCTGCATATCTTTATTTTCTTCCAGGCAATTTGTTTCACTGATGACATTTTGTGTTCTCCTGTTGTT  
TGGAGGGTTAAAAATACCTCAGTGAAGCAGCTGGGAAAACCTTATAGGAGATCAAATTAATGGAACCCAGATTTGGAAT  
CAACAGTGACTCATGTTTCTGTAACACGCTTTTTCATCCAGAATCGTTTTTACTGGTTTTTGGCAAAGAATCTACTGTTTTGGGT  
TGGGTGAAATCATTTTTTCAAGCAATTTTATGGATCTGTGACAAAAGTTAGATTATGTGACATTAAGGCTTGGTTTTATAAT  
GACTCATTTGCAGAGGAAATCCAAAGTTTAAATTTTATAAATACATGATTTCGTGCCCTTGAAGACGATTTCAAGAAAAGTTG  
TTGGAATAAGTTGGTATCTTTGGATCTTTGTGGTTCATCTTCTTGTGCTTAAATATCAATGGTTGGCACACATATTTCTGG  
ATTTCTTTCTGTTCTCTGATTTCTTCTACTAGCTGTGGGTACGAAGTTGGAGCATGTAATAATTTCAACTAGCTCATGAAGT

AGCTGAGAAACATACAGCCATAGAAGGTGAATTAGTTGTTCAACCAAGAGATGATCACTTTTTGGTTTCATCGCCCCACA  
TTGTCCTCTTCTTGATTCACTTCATCCTTTTCCAAAATGCTTTTGAGATTGCATTTTTCTTTTGGATATTGTTTACATAT  
GGCTTTGACTCATGTATCATGGGACGAGTCCGTTACATTATTTCCAAGGCTTGTTATTGGAGTATTTATTCAAGTACTATG  
TAGCTATAGTACCCTACCCTTTACGCAATTGTAACACAGATGGGAACCTCACTTTAAGAAGGCGATATTTGATGAACAAG  
TGCAAGCACGCTCTTGTGGTTGGGCACAAAAGGCAAAGAAGAAAGGTTTGAGAGGTGATAGTAATGCCCAATCTGCTCAA  
GGAAGTGCTCAGGTGGGTGCTGGAATTCACCTGGGAGCAGTCTTCAGGAGGGCATCTGCCCCAGAAGAGAATGTTATTGT  
CCCTACAAAATGAAGGGCATCAATGA

>VrMLO13 JJMO01000320

ATGGCAGAAGTGTCTGCAGCAAGGTGCTCTCTGGCTGAGACACCAACCTATTTCAGTTGCTTCTGTTGTTGCTGTCTATGGT  
TTTTGTCTGCTTGTGGTTGAACGTTCTATCTACCGTTTTGGAGAGTGGTTGAGGAAAACAAGAAGGAAGGCACTTTTTG  
CATCACTGGAGAACTCAAGGAAGAGCTGATGTTGCTGGGGCTTATCTCTTTGCTGTTGGCACAAAGTGAAGGTGGATC  
TCTGAAATTTGTGTGAATTCGTCACCTTTTAGCAGTCGATTTTATATTTGTTCTGAACAAGACCTGGACATCAATGAGAA  
TATCATGTTGGAAAGCTCATCATCTATACCTGGTGAACCTAGTATTTCCAAAGGGATTAATACTGGAGCATTCAACCAAT  
GTGGAGAGGTCATGAACCGTTTTGTTTCATACGAGGGTCTTGAGCAGCTGCACCGGTTTTTTGTTTCTCGGAATCACT  
CATGTTTTGTATAGCTGTCTGGCAGTTGGTTTTGGCGATGAGCAAGATATATAGTTGGCGCCGATGGGAAAATCAGGCTAG  
GATGCCAAGCGATGGAAACCAGCAAGCAAAGAAAATCAAGCTGATGAAGCGACAGACAACATTTATTTTCCATCGCACTT  
CTCATCCGTGGAGCAGGAGTCCAATCCTAAACTGGATGCTCTGTTTTCTACGTCAGTTTAGGAGCTCTATACGAAAATCA  
GATTATCTTGCACCTACGTTTAGGTTTCATCACTGAACACAAAATGCCCGTTATCTTATAATTTCCATCAATATATGGTTG  
AAGCATGGAAGATGAATTTCAAGGCATTCATAGGAATAAGCTGGTTGCTTTGGATCTATGCCATAGTGTGCATCTTCGTGA  
ACATCCACGGTCTGAATATATACTTCTGGCTATCATTATCCCTGCAATTCCTGTATGTTGATAGGGGCAAAGCTTCAA  
CATGTTGTATCAACCTTAGCATTGAAATTTAGGAGCAGAGGTCATGCTTATGAGAAATCATTACATGATCATCATTCCGTTGGCA  
CCTATTTTGGTTCAAAAAACAGATATACTGTTATGGCTGATACAATTTGTATATTTTCCAGATGCATTCGAAATGGCAA  
CGTTCATTTGGACATTTGTTGGGATTTCAAGAAAAGTCAAGTTCATGCTTATGAGAAATCATTACATGATCATCATTCCGTTGGCA  
TCTGGTGCTATTGTTTCAAGTTCTGGTGTAGCTATATGACAGTGGCCCTGAATATAATAGTTTGTGATGAGGATCTCGATG  
CAAGAAGGCCCTTAGTGGCGGAGAGTGTAGAGAGTCCCTGCATAGTTGGTGTAAAAGAGTGAACACAAAGTCTAAGCATG  
ATTCATTGCATTCACACACGGCAAGATCAGTATGCTCCCTCGAATCAACAATCGATGAGAGGGACGAAATAACAGTAGCA  
TCTGGTACTCTGACTCGAAGCTCTTCTTTAGCCTCTTTGAATCAGATAACAGTGAGTTCAGTAGACCAGCTGAACTTCGA  
GACTCCCAACAAAGCAAAGATTCATCAAGGTGGCTGGATGTTTGTCTGGATCTGTACATACGAATCCCCCACAACCAT  
CCCACAACGTTGAAGATCGTGTGCGTAATGGAGAGGAAGCAAAGCTATCACTCTCCTTGATTTGTTTCAGAAAACATGA

>VrMLO14 JJMO01000320

ATGGCAGAAGAACCTAACCACCTCTCTGGAATATACACCAACATGGATTGTTGCGGTTGTTTGGCTGCATAAATTGTTTTCAT  
CTCTCTTTGTGTTGAACGTGCCCTTCAAAAACCTCGGAACTACCTAAAGAGAAAAGGTGAGAAAGCACTGTATGAAGTCT  
TGACAAAATTGGAAGAAGAATTGATGCTTTTAGGGTTTCATTTCCCTTCTATTAACCGTCTTTTCAAGGTTTAATAAGCGAA  
ATTTGCATCTCACCAAACCTTGCAACCCAAATGCTTCCATGCAAAAAGGCCCTCATAGGTCTTCAGAAGGTTTCAGCGCATT  
TCAGATATACTATGATGCTATAATAAACAGAAGGAGGCTTTTGTCTAGTGGTTCTGGTTTCAGATCATTGTACACATAAGG  
GTAAGGTTCCACTGTTATCATTTGGAATCTTTACATCAGCTTACATTTTATCTTTGTATTGGCCGTTGTACATGCCATA  
TTCTGTGTACACAACATGCTTCTTGCAGGTGCAAAGATGCGGGAAATGGAAGGTATGGGAGGATTATTATCGAGATCACAG  
TGAAGCAATAGATAAAACATGAGTTCTTCAAAGAAAAAGTTCGAGGACATTTGGAGAAAAGCAGCTGTTATTAGTTGGCTGA  
TGTCATTTCTCAAGCAATTTTCAAGCTTCTGTTTACAAAAGTATGACTACTATGCACCTTCGGTATGGATTTATCAAGAAACAC  
CACTCAAATAACCTCAAGTATAATTTTCAATAATTACATGCTGAGAACACTTGAAGTAGACTTCAAAGAGGTTGTTGGTAT  
CAGCTGGTACCTGTGGGTCTTTGTTGTGCTGTTTTTGTGTTGAACATTGAAGGATGGCACACTTATTTCTGGTTAGCCT  
TTTTACCCTTGATACTTCTACTTCTGGTGGGGGCAAAGTTGGAGCACATAATCGCTCGTTTGTATCAGGATTCAGTAGAC  
ATGTTGGGAAGAGATGATGACAAATTAGTGAAGCCATCAGATGAATATTTCTGGTTTACCAGCCCTCTCCTAGTCTCCA  
CTTACTTCACTTCATTTTGTTCAAAACCTCTTTTGGATTTGCATTTTCTTCTGGATTTGGTGCACATATGGATTTGATT  
CATGCATTATGGAGAAAGTAGCCTACGTTATCCCAAGACTTATAATGGGTGTAATTTGTTCAAGTGTCTTGCAGTTATAGC  
ACCTTGCTTTGTACACTATTTGTGACTCAGATGGGTAGCGAAATCAAGCCTCAGAAGTTGCTTTCAAGTACTCCCTCAA  
TACACCGCATTCAACTGTATGATCAAAGAATCAACCCAACTGATGAACAAGCAATAATCATGGTGGAAAGATGCAACAT  
CTGCAATCGAGCTTGTTCCTTGGAGAAACCTAACACATCCAACAGTTAA

>VrMLO15 JJMO01000319

ATGGCAGCGAGTGAAAGTGGCAGCAGTTCAGAGAGCTCGACCAGACACCAACGTGGGCCGTTGCTGTCTGTGCACTGT  
TTTCATTTTGAATTTCCATGGCACTCGAAAAAGTCTCCATAAAGTTGGGACGTGGCTTGGAAAAAGCAAAGAAGGCTT  
TGCTCGAAGCCCTGGAGAAGGTCAAGGCTGAGTTGATGATTTTGGGTTTCATTTCACTGCTTTTACTTTTCGGGCAGAGT  
TACATTTGCAAAAATATGATTTCCGAAAAGCTGGCAGACAAACATGTTGCCATGTCCATATAAATAAAGGATGCTGAAA  
GGCATCAGACAGATGGAGAAACATCGTAGAAAACCTTTTGTCTTATGAACGTAGATATTTAGCTCTGTACTACCTCTCGT  
TTAAATGCAGCAATGAGGGACATGAGCCACTATTATCCGTGAATGGTTTGCACAGTTACACATCCTCATATTTCTCTTA  
GCAGTCTTTCAATGTGCTTTACAGTGTATCACAATGCTTCTTGGAAAGACTGAAGATACGTGGATGGAAGGCATGGGAGGC  
AGAGACTTCAACTAATAAATTTTGAAGTTCGCAATGCTGCTTCAAGATTTAGGCTTACTCATGAAACATCATTCTGTGAGAG  
CTCATGCAGATTTATGGACAAGGATTTCCATTTTCTTATATTTGGATGCTTCTTTAGGCAGTTTTATAGGTCTGTAAC  
AAGACTGATTACCAGACTTTGCGGAACGGGTTTATCACTGTGCACCTGGCTCCTGGAAGTAAATTTAATTTCCAAAAGTA  
TATCAAAGATCATTTGAAGATGACTTCAAGGTGGTTGTGGGAGTCACTCCTGTTCTCTGGGCATCAGTTGTAGTTTACC  
TTCTCGTCAATGTTAATGGATGGCGTACCACACTTTGGGCAGCCGCAATTCCTGTTGTTATAATTTTGGCAGTTGGAACA

AACTTCAAGCCATATTGGCAAAGATGGCGATTGAAATCACCGACAGACATGCAGTTGTCCAAGGAATACCTCTTGTCCA  
AGGCTCAGACAAATACTTTTGGTTTGGTCAGCCACAGTTAGTCCTTCACCTTATCCATTTTGGCTTGTTCAGAATGCGT  
TCCAAGTAACATATATCTTGTGGATATGGTATTCATTTGGGGTGAGAACTGTTTCCGTAATGATTACAAGCTTGCAATA  
ATGAAAGTAGCTTTAGGGATTGTGATGCTATGCCTCTGCAGCTACATCACCCCTCCCATTATATGCTCTTGTAAACGCAGAT  
GGTTCAAGGATGAAAAAGCGATCTTTGACGAGCAAACAACAAAGGCTTAAGGAACCTGGCACATGGCTGTGAAAAAGA  
AGCAAAGGGTGGTAGCTAGGAAAGTTCAAAGTCAAGTCTGTTGATGGAAGCCCGCTGCTTTCATCTTCAGCCGTACAC  
CCTTCTGGGCTACACTTCACCGTTTCAAACCACCGGCCATTCCACCCGCTCCCAGTCGTACGAGGATCAAGATCATGA  
ATACGAGTCCGATGTTGAGTTGCTCCTGAGTTGTCCCAAACAGCCAGCTTCATTGTGAGAATGGATCATGCTGATCACC  
AACAACTACAAGAACATGAACATCTGAGGAAGAAACCAACTCCAGTGAAGAAGCTGAATTCTCTTTCAAACCTAGTGAT  
CTTGTGGAAAAACCACCACATAGCTTATAA

>VrMLO16 JJMO01000319

ATGGGGGAAGAAAATGGCGAAGGAAGATCCTTAGCTGACACCCCCACCTATGCCGTGGCAACTGTGATCACTGTCTTGT  
TTCTTTTAGTTTCTTGTTCAGGGCACGTTAAAAAACTGGTAAAGTGGTTGGACAGAACCAAGAGAAAATCTCTGCTTT  
CTGCTCTGGAAAAGATCAAAGAAGAATTGATGCTTTTTGGGCTTCTGTCTATTGCTGATGGGTATTGGATTATTTTTGTG  
GCAAAGATTTGCGTTAAGTCATCGGTAATAAGCAGCAGATTTTTCCGTGCCATTGGAAAAGAATTCTGTGAAACGTGT  
GGTCTGGTTGAGTTCAAGATATTCAAATAGAACAGTTGTCAAAGGGCAAGTGAACAATGGCTTGCAGAAATTATTGCCCTG  
AGGGTCACGAATCATTGGCTTCTTATGAAAGTCTTGAGCAGCTTCATCGCTTTGTGTTTGTCTTGGGGTCACCCATGTT  
ACCTATAGCTTTCTTGTCTTGGCCCTGGCCATGATCAAGATATATAGCTGGAGAACATGGGAAAACGAAGCAAAGACTAT  
TGCTGTACAAAAGCATAACAAGATACTTCACAAAGTACAACAAGCATAAGATTGAGGCGGCTTAATACATTCTGCTTTTACC  
ATACATCCCATCCTTGGAGTCATCACAAAATCTTGTTTGGCTGCTATGCTTCAGCCGCCAATTTTGGAGTTCTATTAC  
CGAGCTGATTACATGGCATTGCGCTTAGGCTTCATTACTTAACCATGATCTTCCACAACATACGATTTCCACAACATATAT  
GCTTCGAAGCATGGATGAGGAATTTCTGTGACATAGTTGGACTTAGCGTACTCTTGGGTATATGCCATCTGCTGTATTT  
TCCTAAATTTTCTATGGTAGCAACTTTTACTTTTTGGCTTTCTTCCGTTCCAGCAATATTGATCCTTATTATTGGTACTAAA  
TTGCACCGAGTGGTAGTAAAGTTGGCTGTTGAAATAATAAATCGTTGCCCAAATATGAAACCTCACCAATTTAACTTAAG  
AGATGAGCTCTTTTGGTTTGGAAAGCCCAGGTTCCATTACGGTTAATTCAATTGATTTCTTCTTGAATGCATTTGAAA  
TGGCTACATTCCTATGGTCTTTGTGGGAAATTAAGATCCTTCTTGTCTCATGAACAACCGAACCTTTATTGTGATACGC  
TTGTCTATTCGGGGTCTATCTCCCAAGTCTGGTGTAGCTTTATAACGTTTCTCTCTACGTTATCATCACACAGATGGGTTT  
AAGTTCAAGAAGACCGTGGTCTCTGAAAATGTGAGAAAATCACTCTCTAAATGGCAGAGAAGAGTGAAGGAGAGACAAA  
GTTATCTTCTGCACCTTACTGCAACATCAACAGCATCGATAAGTTCTTTTATCTGTGAAACGAGCGTGGTTTGTATG  
ACTGAGGAAGGAAGCTCCTCAGGGACTAAAGATATTTGTCTCTTATCTTGTATCATGTGTCAAGGACTCAAGCAGATGC  
ATCATTTCCAAGCTATGAAAATGATCCTCATGATATAATCCATGATTCTGCTCTCTCCATTGTCTTGA

>VrMLO17 JJMO01000831

ATGGCTGAAGAAAAATTTATAAAAGATCAC'TGGAGGAAACACCAACCTGGGCTTTTGCAGTAGTTTGGCTTTGTGCTGCT  
TGCTATTTCAATCATCATTGAGCATGTTATTCATGCTATTGGAAAGTGGTTTAAAAAGAAACACAAAAGTGTCTTTTATG  
AATCGTTGGAAAAGGTCAAAGGAGAGCTTATGATGCTAGGGTTCCCTTCCATGCTCCTAACTGTGTTCCAAGCTCCAGTT  
TCTAAGATCTGCATATCAAAAAATGCTGCATCAACGTGGAATCCCTGCTCCAACCCAAAGGCCATCAGTAATTCGAATGC  
AACATCTGCTACCATTGATAGGAACTTCTCCAATATTTGGACCCCATGCCAAGACGTACTCTTGTGCAAAAAGTTATG  
ACAAAATGTGCTGACCAGGAAAAGTTGCTTTTGTTCAGCATATGGGATTCCAGCTCCATATATTTCATCTTTGTGTTA  
CGAAACAAAAGACAATTGAATACGAATTTCTATAATGATCCTGAGAGATTCCAGGCTTGCAAAGGACACAACATTTGGACAAA  
GGCACTTGAATACTTGGAGTCAATCATCAATTTCTTAAAGGATAGTCAGCTTCTTCCAGACAATTCTCTGGATCTGTTAAG  
AAAGTTGACTATTTTCGCATTACGGCATGGATTTATAATGGCACATCTGGCACCGGAAAGTGATACAAGATTTGACTTCCA  
CAAGTATATCAAAAGATCACTGGACGAGGATTTTAAAGTTGTCTGATAGGCATAAGTCCAATTTTGGTTCTTTGTGTTT  
TCTTCTGCTGACTAATACTCATGGGTGGTATTCTTACTATTGGCTTCCATTTGTCCCATTAGTTACCATTTTGTATAGTG  
GGTGTAAAGTTACAAATGATCATAACAAGATGGGACTGATGATTGAAGACAAAGGGAAAGTAGTTAAGGGTGCACCTGT  
GGTTGAGCCAGGAGATGACTTGTCTGGTTCAATCGTCCAAGACTCCTTCTTTTCTGTCATTCAATTTGTTCTCTTTTCA  
ATGCCTTTCAATTAGCACATTTTGCATGGAGTATATATGAATTTCCATGAAATCTTGTCTTCCACAAAACAACCTGCAGAC  
AGTATGATTAGACTCACAACGGGGTGTATATAACAAGTTCTGTGTAGCTACGTGACTTTGCCTCTTTATGCTCTAGTCAC  
ACAGATGGGTTTCTTGTAAACCAACCATTTTCAATGATCGAGTAGCAGCAGCACTGAAGAAATGGCACCATACTTCCA  
AAAAGCATGTCAAACATAGAAAGCATTATGAGGCTAAAAATTTCTCACCATTCTCCAGCAAATCATCAACCCCTACAGTT  
GGCATGTCTCCCATTCATCTTCTGATGGACACCCCTGCTGGCAGAAGTGACAGTGCACGAACCTTCTCCAAGAAACTCCAA  
CTATGAAAATGAAGAATGTGATGTGCAAGGTGAATCTTCC

>VrMLO18 JJMO01001841

ATGGACAATAATGAACAGGAAACAAGGTCAATTGGCCCTGACTCCTACATGGTCAGTTGCTACTGTGTTGACTGTCTTTGT  
TGCTGTCTCTCTGCTTGTGGAGCGCTCCATTCACCGTTTAAAGCAATTGGCTGCGGAAAACCTAACCGAAAACCTTTGCTTG  
CAGCTTTAGAGAAGATGAAGGAAGAATTGATGTTACTCGGGTTTATATCACTCTTATTAACAGCTACCTCACGCATGATA  
GCAAATATTTGCATTCCATCAAAGTTCTACAACAGTGCTTTTGTCTCCGTGCACTAGATCCAGATTGATGAACAAATGGA  
AGAGAATGGATCTGAAAAGCGTAAACTATGGATGGCTTCTGCTTATCATGTATCAGGGAGGATGTTGAACGGAATAAATA  
GAAGCACTTGTAAAGAGGGTTATGAACCATTTGTTTCTGATGAAGGTCTAGAGCAGCTGCACAGGTTTCAATTTTGTCTATG  
GCAGTGACTCATATATCTTACAGTTGCCTAACATGTTGTTGGCCATTGTGAAGATTACAGTTGGAGAGTGTGGGAAGA  
TGAGGCTCACATGGATCGGCGTGATTCATTATCTGAAATTACAAGAGAGTTGACTATGAGAAGGCAATCAACCTTTGTCA



AGTCTCATTATCAAATCCATTGTTCAAAAACAGTTCCTTATTTGGGTGCTGCAGACATGTTTTTCCGACAATTTGCA  
CATTCTGTGGTTCGTGCTGATTATCTTACACTTCGCAAAGGCTTCATCATGAATCACCACCTTTCATTAAGTATGATTT  
CCACAGCTACATGGTTCGGTCTATGGAAGAGGAATCCAAAGGATAGTTGGTGTGAGTGGCCACTCTGGGGATTTGTTG  
TTGGCTTCATGCTTTTCAACATTAAGGATCTAACCTATATTTCTGGATAGCTATCATTCTGTATCTCTTGTGCTTTT  
GTGGGAACAAAGCTACAGCATGTCATTGCAACCTTGGCATTGGAGAATGCTGGAATGCAGGGTCTTCCCAGAAGCAA  
GTTGAGGCCCTCGTGAACCTCTTTTGGTTAATAAGCCTGAGCTATTATTGTCCTTGGATCCATTTTCATTCTTCCAGA  
ATGCATTTGAGCTGGCTTTCATTTCTTTTGGTTCTGGTGGCAGTTCGGATATGATTCTTGCTTTATTAGGAATCACCTTCTC  
CTCTATTTAAGGCTAATATTGGGCTTTGCAAGACAGTTTCTTTGTAGCTACAGCACCTTGCCACTATATGCACCTGTTAC  
ACAGATGGGAACAACTACAAGGCAGCATTAAATCCCACAGAGGATAAGAGAAAACAATTCATGGATGGGGTAAGGCAGCTA  
GGAGGAAGAGAAAACATGGTATGTTCCCTGATGATTCACCATTATACAGACACAAGCACTGTGTTGTCTATTGAAGAA  
GATGATCAATTAATTGATGCCCCCTGAAGTAGAATTACAACCAGTCAATGCTGTTACATCTACCCCTTCTCCATTGCCAA  
TGAAACTTCAAGTAGGGTTGCTACACCCCTCCTAAGACCCTCTGCTTCAATATCTTCAGCTCATAGCAGTTCTAAAGCTG  
AAGTAATTTTAAGATGCTCCTCTATGCCAAGTGGGAGATAA

**Supplementary Figure S11.** List of legume MLO deduced protein sequences.

>ArMLO1 ARADU . 27DYI

MHASKCKMQFFMISIACSLLWNGVMASDSSSGTGESELDQPTWAVAGVCTVFILISIVLEKGLHKVGTWLNDRHKRALLE  
ALEKVKAELMVLGFI SLLLTFGQSYIVRICIPGSAADKLLPCKYAGSGDESSGKDQIHRKLLSEDGVYKCKEGYAPLISS  
NGLHQLHLILIFFLAVLHVLYSAVTMLLGRKIRGWKAWAEATSSHGYEFATDASRFRLTHETSFKAHATFWTRNPVFFY  
IGCFFRQFYRSVGKADYLALRNGFISVHMAPGSKFDFQKYIKRSLEDDFKIVVGVSPVLWASFVIFLLLNINGWHAMFWA  
SLIPVVIILAVGTKLQATLANMAIEITEKHAVVQGIPLVQGSQYFWFGRPQLVLHLIHFALFQNAFQITYFLWIWYTFG  
FRNCFHADFKLAILKVVGLGLVCLCSYITLPLYALVTQMGMKRSIFDEQTSKALKKWHMAVKKKHGERLKGSKARTL  
DDGSTIGSTVHSSGPMHRFKTTGHSTRHTSSYEDHDDDEDYQSETELSPIPRSSLIVRVDNGDQOEI IARENHRPTVG  
EQTNNGFGG

>ArMLO2 ARAIP . Y3LT4

MSGGGVEEGNDLEFPTWVAVVCSVIVAVSLLAERLLHYAGKFLKRKNQKPLFEALLKVKEELMLMGFISLLLTVTQNG  
IIRICVPEHWTHMLPCKFEDKEEETKTTSHFQNFSSGSLRHLLEASKSAETGSQTGYCARKGKVPLLSIEALHHLHI  
FIFVLAIVHVTFCVLTVVFGGLRIRQWKNWEDAIKENYNSERVLEPRPMVTEVHQHEFIRDRFTGFGKDSAILGWMKSF  
FKQFFGSVTKLDYVTLRLGFI MTHCRGNPKFNFKYIMIRALEDDFKKVVGISWYLVIFVIFLLININGWHTYFWIAFIP  
VIVLLAVGTKLEHVITQLAHEVAEKHAAIEGELVVQPSDDHFWFHRPRIVLFLIHFILFQNAFEIAFFFWIWVTYGFDSC  
IMGQVRYIVPRLIGVFIQLCSYSTLPLYALVTQMGTHFKKAI FDEQLQVRLVGWAQKAKKKGPRPESSHNGSSTAANN  
NGVQLGSIFRRASAPPEHDANSIVPI

>ArMLO3 ARADU . 65SUF

MAAGEQEEQRSLQETPTWAVSICFFFI LLSLSIEVGLHKL SAILKKNRRSLGKALAKIKTEMIKYGFISFLLTISQOI  
PLSKICVREAVANSFLPCSDPPLMRSLTEEVASWDFGEEKGRSLNATANEVNYCESKGMVSLISDDGIQQLNIFIVFLAV  
FHISCTLTMLGMAKMRWKKWENETQ TLEYQIAHDSSRFQYTRQTSVGRHLNFWSNYSPLLWVMVCFRLQFYRSVSKD  
DYFTLRNGFIAANISVGGNFNFMKFLSRTYDQDFEKIVRIRSWIWFISILFIFFAHEFYNYHWLFPFIPLVVAIIGGTKL  
QVILTNCVDSVKEKAVIKGTILVKPNDYFVWFRPEWLLYLIQFILLQTSFQLAFFAWTWYEFGRPCFNREVESIAIH  
VIMGVTVQILCGYVTLPLYALVTQMGSGMRSVAFTEERVTEGLKSWHKRAKQSVSNNNSTSSKYLASLHRSKSESSIKENL  
SNRGDSRESNENTMHPPLPLASGSGEEEEESTTGETQEEEISTHSISEIKTVEEENENNNDNNNQIIVRGGTFIGEAS  
FGSSWKNMDSPTIISKIGSVTEEDDNISDIYLT

>ArMLO4 ARADU . N8G7F

MAEEELNESLEYTPTWIVAVVCTIIVFISLVVERGLHKLKGYFKKKNQTPFLDALQKLQEELMLLGFISLLLTVFQTAIS  
HICISPELTTMLPCKRPHESESGSAHDQIYYDGI INKRRLFVEDTSQHCRSKGKVPLLSQESLHHLHIFIFVLALVHA  
IFCVTTLFLGITRMRQWRWEEI KSKITRTGDSSSIQALHHHEFFKKHADGYWRAAVVWGLISFFKQFYGSVTESDYI  
ALRYGFIKEHCPRKPQDFHNYMVRTLEVDFRRIVGISWYLVLFVFLLLNIAGWHTYFWLAFLPVILLVVGAKLEHI  
IARLAQEPAQESARVKPSDEYFWFSRPTLVLDLLHFTLQNSFEIAFFFWIWCTYGFDFSCIMEKISYIIPRLIMGVIVQV  
LCSYSTLPLYTLVTQMGSGFKKGM LDPVVEALLNWAEEERHENSGETSRWRSISSHRMTKEQTQNDHEIAMEMEDATTSS  
IELPSSIVQIPLDRPISYSLRHAQ

>ArMLO5 ARADU . U7W18

MAEVLRRGRSLAETPTYSVASVITVMVFVCFVVERSIIYRFGKWLKTRRKALFASLEKIKEELMLLGLISLLLAQSARWI  
SEICVNSSLNFSEFYICSEKDL DANQNVMPDGSSFSPEDETIPKGLISGSFNQCPAGHEPFVSYEGLEQLHRFLFVLGIT  
HVLYSCLAVGLAMSKIYSWRWENQTTAAADGNLQGKRNVKRRQITVFVHHASHPWSRNPILIWMLCFRLQFRSSIKKS  
DYLALRLGFITEHRLPLSYNFHQYMVRSMEDEFHGILGISWPLWIYAIICIFVNIHGLNIYFWLSFIPAMLVMLIGTKLQ  
HVVSTLLEIMEQQGPLARTQVKPRDDLFWFKPEILLWLIQFVIFQNAFEMATFIWSLWGLEQKSCFMKNHYMIIIRLA  
SGVLVQFWCSYMTVPLNVIVSQMGSRCKKALVTESVRDSLHSWCKRVKQKSKHDSHHTARSVCSLESTIDERDEITVVS

GTLTRSSSLDLESLNQITVTSVDQLKFEASNSSRDQDSMKVAEYLSKSVHIDSTQPPDNGEDHVGGSEDAKSETLSDLF  
QKT

>ArMLO6 ARAIP .HRR0E

MMEPIGEERSLSEPTWAVATVVTILVLSLFLFHGTLKFLKWMARTKRKSLLSALEKIQEELMLFGLLSLIMGHWIIFV  
AKICVKSSALSSRFPCAVKDISGTAVQHNIWFHTSHYNNSDSKEKHLIGLRNYCPEGHESLASYESLEQLHRFMFVLAI  
THVTYSFVAVALAMIKIYSWRWENEAKTMALQQSLQGTPTQTTSSIRLNRLTTFVVFHQTSHPWNSHKVLVWLLCFSRQFW  
SSINCADYMALRLGFITNHELPLTYDFHNYMLRSMDDEFDRDIVGVSULLWIYAICIFLNFHGSNFYFWLSFVPAIILILI  
IGTKLHRVVVKLATEIVDRCPYVYKPHQFNLRDELFWFGKPRFLLRLIHLISFLNAFEMASFLWLSWEIKEPSCFMKNKTF  
IAIRLSFGVVSQVWCSFITFPLYVIITQMGSRFKKSUVSENVRESLSKWQRRVKHKQSSPQALVSETSPSSDSGINNAMD  
KLISGEGSSSGTKHDYCYSHHFDYVSSRTQRNEPFLSHDDDDDDDDSYPLPLS

>ArMLO7 ARADU .0YR51

MAGGEGGAGERSLQETPTWAVAVVCSVFLVLSVLEIHEGHSGLGKWFQKKQKKAMNEALEKIKSELMLLGLFSLLLTFGTN  
YIKKICIPHSIGDTMLPCKKVVSHGGDGRRHLLSFETEDDNDVLSWRRILATSISGDDYCSTKGVPLISASGLHQLHIF  
IFVLAVSHIFYSVMTMVLSQLAKMKKWSWEAETSLEYQFSNDPARFRLAHQTSFVKQHSWRSRMPGIRWIVAFFRQFFA  
SVTKVDYMTMRHGFINAHLGPNKFNFKYIKRSMEDDFKVVVGI SEMPLWVSAIIFLLLVYKWNLTWLSFIPLVILLL  
VGTKLELIMEMAQEIQRDRTTIVRGVPVVEPNKYFWFNRQWILFLIHFTLFQNAFQIALFLWTVYEFKIKSCFHENLK  
LILIRVILGVFLQFICSYITFPLYALITQMGSHMKKAI FEEQTAKAIKKWQKTAKDRTKLRKAGMDNVNSNGYMSGETTP  
SQGTSPIHLLHKYKPSDHTDTE SVLYSPRSYPSDELSETELAYTHHHRIQLNEITTSHGHPNNRQETHNVDFSFDK  
P

>ArMLO8 ARAIP .L2HMX

MAVRGEERALDHTPTWAVAVCASIVLISIVLEKIIHKFEKMFERKKKMLLQALAKIKGELMVLGFI SLILTFGQTYIS  
KWCIPKEYANTMLPCVRSTKEEGEGGGGHNQATPAGAGVVEEKGGAKEAAAEGEPHRRLLTYERRFLAAASEGCKPGM  
EPLISVHGMHQLHIFIFFLAVFHVVSAITMTLGRAKIRGWKAWEQDHIIVDQEALNDPRRFRRLTHETSFVRDHNSIWTKT  
PVSYFYVCFRQFFRSVRKADYLTMRHGFTVHLAPGSKDFDKYIKRSLDDFKVVVGI SPILWASVVFLLVNVHGW  
ASFVSVFLPLMVI LAVGTKLQAIITRMALDIKERHAVVQGIPLVQVSDKYFWFEWPELVLYLIHFVLFQNAFELTYFWWT  
WYEFGWASCFYEDEILMISRVALGIGAQIITSYVTLPLVALVTQMGSTMKKSIFDEQTSKALKKWHQNALKKIASRGRHA  
TLGGTTMSKSPDGS PKMSTRSPNAGQSATILSSVDNTIPAYDNRDLLTGP

>ArMLO9 ARAIP .CFV17

MNVESIMGGRSLEETPTWAVAVLVCVLLLLISIFMDHIFHLIAKWLKRKRKKALYESLAKIKSELMLMGFISLLLTVLQ  
GPISRICVPEKLAATWHPCNHQPEPEDHHVFLAPGSSTHQCAAHQKVALVSAQSIHQHIFIFVLALFHVLYCIFTLA  
LGTAKMRRWQWEEETKKPEYQFSHDPEKFRLTRQTSFGRRHLSVWTTNPILVWIVCFRQFVCSVPKVDYLTLRHGFVM  
AHLAPQSQQKDFMQYIERTLEEDFKVVVEISPPIWFITVFLFLFHGTHGWYSYLWMPFVPLIIIVVVGSKLQVIITKMGL  
RIGERGDIVKGTVPVQPGDNLFWFKKPLMLYLINFVLFQNAFQLAFFSWTALQFGMKSCFQSKTEDVVIKISMGILVQI  
LCSYVTLPLVALVTQMGSNMKTIFNERVASALRNWHSQAKRNIKKKNRGSSFSQTTTSPNHSYDADSLSSSNGARAH  
SCFSSSSSFSSSHHEIEMAHLAHHQHQLKEPNSVHVASDLPLPQHEIQIETSK

>ArMLO10 ARADU .WJ2TG

MSAGGAEENLEFTPTWVVAVCTVIVAVISLAAERFLHYGGKFLKNKNQKPLYEALQKIKEELMLLGFISLLLTVSQNG  
ITKICVPPSVTRYMLPCSLDEKEKVTVEHLLGQDRHFHFERFFSFPRLLAETRGTETETHALAKTEFCARKNKVPLLSVE  
ALHHLHIFIFVLAVVHVTFSVLTVIFGGARIRQWKHWEDSIAKQNYETDQVLKRKVVVDVQHQHDFIKGRFSGFGKDSAIVG  
WLKSFQKQFYGSVTKSDYVTLRHGFI MTHCKANPKFNFKYIMIRALEDDFKQVVGISWYLVWFVVI FLLLNINGWHTYFW  
IAFIPFILLLAVGTKLEHVITQLAHEVAEKHAAIEGELVVQPSDDHFWFHRPHFVFLFIHFILFQNAFEIAFFFWIWVTY  
GFDSCIMGQVRYIVPRLIIGVFIQVLCYSYTLPLYAIIVTQMGTHFKAAIFREHVQVRLAGWAQEAKKKKGVKADSQPEG  
SSHAVAGIQLGSVFQKRASAAEDGASVPKVEGSAE

>ArMLO11 ARAIP .SR8Z2

MSDSVQEARSLALPTWVAVTTLTIFVAVSLLVERSIIHRLSNWLRKTNRKPLLALEKMKKEELMLLGFISLLLTVSRII  
ANICLPKSFYNSAFAPCTRSEIDEEMEDNGSEGRKLLMAFAYPSLTRRMLNMGMRSSCKEAGYEPFVSYEGLEQLHRFIF  
VMAITHISYSCLTMLLAIVKIHSWRVWEDEAHMDQHGLAVITRELTMRQSSSFVKVHTSNPMARNSFLVWVTCFFRQFG  
HSVVRADYTLRKGFI LNHNLTLYKDFHSYVMSMEEFQRIVGVSGLLWGFVVAFMLFNKGSNLYFWIAIIPLVLLVG  
TKLQHVIA TLALENAGITGYFSGSKLRPRDELFWFNKPELLLSLIHFILFQNAFELASFFWFWQFGYNSCFIRNHMLVY  
LRLILGFAGQFLCSYTLPLVALVTQMGTYKAALIPQRIRET IHGWGKAARRKRRHGMFADDSTIHTDTSTVLSLEEDD  
RMVDIPETGTDHVTGTEVELQPVAATATPSPPAANEASSRAATPLLRPSASISSGPFSLRAESIPRCSMPMPSPGR

>ArMLO12 ARAIP .WMV74

MSIRGVDEEQDIELEFTPTWVAVVCSVIVGVSAVERFLHYAGKRLKKNQTTLYEALLKIKEELMVLGFI SLFVSVSQ  
RGITKMCVPKSWSHMLPCSLKEKEELEAETNITSSHFQNSLSFSSNNLRHLLALAHQAQVAAEAQLQYCALKNKVPLLSN  
EAVHHLHIFIFVLAIAHVTFVLTVAIGLLRIRQWKQWEDSVATQNNETHRDLESTVTLVHQHAFIRDHFIGIGKNSTLL  
GWKSFQKQFYGSVTKLDYVTLRLGFI MTHCRNPKFNFKYIMIRAVEDDFKVVVGI SWYLVIFVVI FMLININGWHTYF  
WIAFIPVILLLAVGTKLEHVIMELANEVAERHVAIEGELVVQPSDHHFWFNRPRIILFLIHFTLFQNAFEISYFFWILVT

YGIHSCIMGPIGYIIPRLIIGLFIQLLCTYSTLPLYAIVTQMGTHFKKNIFEEQLERPVIYYGGKAKNNGAKADESHGE  
HERRASSPEANTNVPKEDKSN

>ArMLO13 ARADU.SSV2N\_48N80

MAGGEKERTLEETPTWAVAVVCFVLLAISIIIEHIIHAIGKWLKRKNKTALYEALEKVKGELILLGFISSLLLTVFQNPIS  
RICISKNVASTWHPCAVPKSKSGYEDSDDDDGDGNNRRLLEYLGHIPRRVLATKGYDKCAEKARCLKNYKIFHILQCI  
ITLALGRKMRWKWEDETKTIEYQFYNDPERFRFARDTTFGRRHLSAWSRTSVSLWIVSFFRQFYGSVTKADYVALRH  
GFIMAHLPAGSEAKFDFQKYIHRSLLEDFKIVVGISPIIWIIFAVLFLLLTHTHGWYSYYWLPFIPLTIILLVGAKLQTIIT  
KMGLRIQERGEVVGSPLEVPDGLFVFNRPGLLLSLVHLVLFQNAFLAFLAWSTYEFYSIHSCFHKTVDVVLRLISIGV  
VIQVLCYSYVTLPLYALVTQMGSTMKTTFVFNDRVATALKNWHSKAKHVKDSKHGEGNNSVTPFSSRPTTPHGLSPVHLL  
YRHTVGHSDSVQTSPRISNYENEQWHLQGSPSTTSNHDTDERQVVEQPSTLESPVIGAQHEINISLSEFSFANRQNSRD

>ArMLO14 ARAIP.MQE1N

MSDSVQEARSLALPTWSVPTVLTIFVAVSLLVERSIHQLSNLRKTNRKPLLAALEKMKKEELMLLGFISLLLTATSRIIA  
NICLPSKFYNFAFAPCTRSEIDEMEDNGSEGRKLLMAFAYPSLTRRMLNGMNRSSCKEAGYEPFVSYEGLEQLHRFIFVM  
AITHISYSCLTMLLAIVKIHWRVWEDEAHMDQHGLAVITRELTMRQSSFFVKVHTSNPMARNSFLVWVTCFFQQFGHS  
VVRADYLTLLHNRLSWNHNLTKLYDFHYSYVRSMEEFQRIVGVSGLLWGFVAFMFLSNIKGSNFLDYSYHPCHLVLLVGT  
KLQHVIAATLALENAGITGYFSGSKLRPNELFWFNKPELLLSLIHFILFQNAFKLASFFFWWQFGYNSCFIRNHLLVYL  
RLILGFAGQFLCSYSTLPLYALLTQMGTYKAALIPERIRETIHGWGKAARRKRRHGMFADDSTIHTDTSTVLSLKEDDR  
MVDIPETGTDHVTGTEVELQPVAATASSEAI

>CaMLO1 Ca\_04814/LOC101504273

MAGAALGERTLKETPTWAVAAVCAVFIISVLIIEYGIHSLKWFHKKHKKAMSEALEKIKAEMLLGFISLLLTFTGTYKI  
AKICIPVKLGDSMLPCKKERVEEDSKDRRRLSFDNVLVRRSLAAAAGGDDYCSNKNEVPLISQSGVHQLHIFIFVL  
AVFHIFYSVMTMVLARAKMQKAWEMETSSVEYQFTHDPAFRFAHQTTFKVRHSGWSRKPGRWIVAVFRQFFASVSK  
VDYMTMRHGFINAHFAPDSKFDHFKYIKRSMEDDFKVVVGISIPLWAFAIIFLLMNVYSWYTLTWLAPLVILLVGT  
LELIIMEMAQEIQRDRTTIVRGVPPVEPNKYFWFNRPHWIIFLIHFTLFQNAFQIAYFLWTWYEFITSCFHENLPLIVT  
RVVLGLALQVLCYSYITPLYALVTQMGSHMKRGIFFEEQTTKALKKWQKSARDKRKLKAGGGGSDVPSVSGETTPSQGT  
SPMHLHLKFKPSSHTDTSVLYSPRSYQSDQTDFTDTEGSTHRLNLDQIMSQPQHNPQNLTHNIDFSFDKP

>CaMLO2 Ca\_23649/LOC10500098

MAAQVYERTLEETPTWAVAVVCFVLLAISILIEHIIHVIGKWLKKHKNGLYEALEKVKAEMLLGFISLLLTVFQDPIS  
KICISQKVGNTWHPCSNPKNKSKSNETSENENDRRKLLEYFDPIPRRILATKGYDKCVDKGVVALVSAYGIHELHVFIF  
VLAIFFHLLQCIITLALGRIKMRWKWEDETRSVYQFYNDPERFRFARDTTFGRRHLSMWSQSTISLWIVSFFRQFFGS  
INKVDYLALRHGFVMAHLAPGNDQDFQKYISRSLEKDFKVVVGISIPTIWFVAVLFLLLTNTHGWYSHYWLPFIPLIIL  
LVGVKQMIITKMGLRIQDSGEIIGAPLVEPGDHLFWFNRPDLLLLFLIHLVLFQNAFLAFFSWSTYEFVNSCFHKT  
AEIIRLTLGVVIQILCSYSTLPLYALVTQMGSTMKPTIFHERVATALKSWHNTAKKHVKEKSHSNNTTPFSSRPSTPTH  
GMPVHLLHRHTVSSSDSLQTSNYENQQWNVGNSPTINHTEAHEIRIPTELPVSNRHEISISSKDFSFEKRYIVSD

>CaMLO3 Ca\_04697/LOC101490933

MSGGEEEEETTLEETPTWVAVVCFVLLAISLVAERLLHYGGKFLKRKDKPLYEALQKIKEELMLLGFISLLLTVSQNS  
LTKICVPPSVLRHMLPCTLKEKEKANQVSHYSAFSPGLARRILANEDEHPKTPFCARKNKVPLLSLEALHHLHIFIFV  
LAVVHVTFVSVLTVVFGSARIRQWKHWEDSIKQNYDTHQVLPKPLTHVQHEFIKGRFSGFGKSTLIGWLQSFQFYG  
SVTKSDYVTLRLGFIMTHCKTNQKFNFKYMIIRALEDDFRQVVGISWYLVLFVIFLLLNINGWHTYFWIAFVPLILLLA  
VGTKLGHVITQLAHEVAEKHAAIEGDLVVQPSDEHFVFWHRPRVFLIHFILFQNAFQIAFFFWIIVTYGFDSCIMGHIR  
YIVPRLVIGVFIQVLCYSYSTLPLYALVTQMGTHFKRVIIFNEHVQDGLVWGAQKVKKKKVVKADGQSSHEGSSTGVQLGS  
VFQKRASAHETNNGQSSHEGSSTGIQFGSAFQKRASASEDNTPPITKTDGSN

>CaMLO4 Ca\_01959/LOC101505951

MEKENGNRSLAETPTWAVATVVALVSLFSLHGTLLKFLKWLDKTKRKSLLSAMEKMQEELMLFGLLSLLMGHWILFV  
AKICVKSSVLSRFFPCAMEKSFIVKQVAWSNSEYSNQTILKEQAHHGRHNYCPKGHESFASYESLEQLHRFVFLGIT  
HVSYSFVSVALAMIKIYSWRWENESKTMVQSLQDTSQTTSTSSIRLRLSTFIFHHTSHPWSSHKVVLWVICFSRQFW  
SSINRADYMLRGLFITNHDLPLTYDFHNYMLRSMDEEFCDIVGVSVVLWIYAICIFLNFHRSNFYFWLSFVPAIILIL  
IGTKLHRVVKLAVEVRDHCYPMKPHQFNLRDELFWFGKPIILLRLIQLISFLNAFEMSTFLWLSWEINDPSCFMNRTY  
VAIRLSFGVVSQIWCSEFITFPLYVIITQMGSRLLKSVISENVRKSLSKWHRRVKAKRSSSYALLTKTSPTSLDFLLYGD  
NSNSNKSFAFISETEEGSSSGTKDNLNLDVSMQKL

>CaMLO5 Ca\_04811/LOC101503406

MSGGGGGDERQLDVTPTWAVAAVCAVIVIIISISLEKLIHKIAKVFEEKKHALLEALEKIKAEMLVLFISLLLTFTGQN  
YISKVCIPTRYSNMPLPCLDQRQAGHPSEPAQTGHEPPTTGHEPPTTGHEPPTTEHEPPTTEHEPAPTEHE  
PPPTAHEAPAEAAEPSKGEHRRLLSYERRVLSGGGGHGCKLGYVPLIAVNGHLHQLHIFIFFLAVFHVIIYSAITMTLGR  
AKIKGWKEWEQDHVDEDALNDRRFRRLTHETSFVRDHNFSWTKTPVSFYVCFRQFFRSVRRADYLTMRHGFVSVHLA  
PGSKFDFQKYIKRSLEDFKVVVGISPLLWASVVLVLLNVHGWAAFWVSFLPLVVLAVGTLQAIITRMALDIQERH  
AVVQGIPLVQVSDKNFWEFQVLVLYLLHYVLFQNAFELTFFWWTWYEFGWASCFYEDDSFMIVRVALGLGAQFVCSYIT

LPLYALVTQMGSTMKRSIFDEQTSKALKNWRNKAMHKKPSIKRPTETRTLGSMPDDGSPLDSPLTNINTSAETELQEHGT  
ATILTSVDNDHYDNRDLLTGP

>CaMLO6 Ca\_02517/LOC101492588

MAGGRSLTETPTWAVAVVCFVLSISIIIEHIFHIIIGKWLKKNKHSALYESLEKIKSELMLLGFISLLLTIGEGLISKIC  
ISEKVAATWHPCTNNAERNSDHQPIEHETGGRRLLAALLASQNKNSRRILAAGGIDKCAAQGVAFVSSEGIHQHIFIF  
FVLAVFHVLYCILTALGRAKMRWRKWEETKTLEYQFSDHPPERFRFASETSFGRRLHSFWTKNPVLIWIVCFRQFVR  
SVPEVDYLTLRHGFMMAPLQSHQKDFRHYIKRCLEEDFKVVVEISPPWIFITVLFLLFHTHGWHSYLWLPFVPLIIV  
LLVGTKLQVITQMGRLIQKQGMVVKGEVQVPGDDLFWFVSKPRLILHLINFLVFNQAFQLAFFSWTALQFGLTSCFNRSR  
TEDVVIRISMGVVFVQILCSYVTLPLYALVTQMGSTMKPAIFNERVATALRNWHNTAKKHIIKQNRGSGFQSPMSTRSITPA  
HSMSPAHIILRPYHSETDTHPTTSPTRLNFETYNPYEAYSPSPSNKVEARATSSSSIIYFHEMEMGHLAHDHEQETNKPNCV  
SVGSGLTQLEIDVQHSDEFSSKMATNNLK

>CaMLO7 Ca\_11758/LOC101501959

MSGGEGEGEGPDLQFTPTWVVALVCTVIVAVSFAVERSLHYVGKFLKKNQKALFQALQKIKEELMLLGFISLFLTVTQ  
NRITKICVPENWTHMLPCSLDEKDEESKSTSHFQTFSSNDVFGTTRRLLGDDHPSTEETLGYCAAQGVPLLSVEAL  
HHLHIFIFVLAVVHVTSVLTIVFGGLNIRRWKHVEDSITDENHETQHAPDRTVTHVHQHAFIKDHFTGFGKDSAIMGWV  
RSFFKQFYGSVTKLDYVTLRLGFIIMTHCKANPKFNFKYMNRALEDDFKKVVGISWYLVVYVFLFLLLNINGWHTYFWIA  
FIPLILLAVGTKLEHVIQLAHEVAEKHTAIQGELVVQPSDDHFWFHRPRIVLFLIHLILFQNSFEIAFFFWILVTYGF  
DSCIMGRIRYIIPRLIIGVFIQLLCSYSTLPLYALVTQMGTHFKSVIFDEQVQARLVGWAQKAKKKGLRGDNNQSNQESA  
HHGSSVNIQLGSIFFRGSVPENNTIVSRDEESG

>CaMLO8 Ca\_00046/LOC101508058

MEDVMHRGRSLAETPTYSVASVVTVMVFCFLVQRSIYRFGKWLKTRRKALFASLEKIKEELMLLGLISLLLAQSARWI  
SEICVNSSLFSSRYTCAEQHLGTIENIMIENSSLPDETNI PKGLSSVALHQCCEGHEPFVSYEGLEQLHRFLFVLGIT  
HVLYSCLAVALAMSKIYSWRWENQAAMATDANLQGGKKNVMRRQITVFVHRTSHPWSRSPILIWMLCFRQFRSSIQKS  
DYLALRLGFITEHKLPLSYNFHKYMVRSMEDEFHAILGISWPLWIYITIVCIFVNIHGLNIYFWSIFIPAILVMIIGTKLQ  
HVVSTLALEREQQGPSARTQVKPRDGLFWFKPDILLWLIQFVIFQNAFEMASFIWTLWGFKEKSCFMRHHYMIIRLT  
SGVVFVHFWSSYMTVPLNVIQSVMGSRCKALVTEVRESLHWSCKRVKQKSKNESMHSHTARSVCSLESTIDERDEITVV  
SGTLSRTTSLDLESINQITVTSVDQLNFVTSNNLHDSTNLSESVHINSPLYNDGDHVGNAEEAKIESTLFEFLFQKT

>CaMLO9 Ca\_11277/LOC101495573

MLATEQGRNIISNGLIEIKKNMAVKGEQRSLEDTPTWAVSVCSFFVLIVSLIIIEAGLHKLTEHLKKKKRIISMKGALAKTK  
TEMMKFGFVSLLLTISQVPIISKICINKDVANSFLPCNDSMESEYQFINYCEAKGKVSLLSSDGILQLNIFISFLAVFHIL  
FCTFTMCLGKAKMRWKWEDETTLEYQIDNDSRRFYIISQTLGGKRHLKLWNNYSPLLWVCFMRQFYNSVSKDDYFA  
LRNGFIVANISMGSNFFNFKFLSRTFDEDFEKVVGIRFWIWFSSILLIFLSAHEFYNYWLPFIPLVVALLAGTKLQM  
IITNMHLDSCKQSPVIKGTILVRPSDEYFWFHRPEWLLHIKILILIQNSFQLAFFTTWTWYEFGRSCFNREKADIAIRIA  
LGLAVQLLGCYVTLPLYTLVTQMGSNMRKEIFTERVVEGLKSWQKAKRSLSKNNSTCSRHTVSASLHASKASENSVKESS  
ESMHNKVDNENMQSITVVTGSGEIEINIATNSSVEQEMIIPTEEHNAKIITRGIYDGEISFGSSWKNVGSRSRISREIV  
SIAEEEEENEDEDVTVTNYHI

>CaMLO10 Ca\_10710/LOC101494654

MAATESDSYNSRKLDEPTWAVASVCTVFILISIALEKSLHKLGMWLGRRQKKALLEALEKIKAEMLILGFISLLLTFTG  
QNYIVRICILEEVANKMLPCPKYSNISDDKSSSEVVNRKLVSYEGRFLAADTPSFKCSRKGHEPLLSINGLHQLHIF  
IFFLAVFHVLYSAITMLLGRKIRGWKEWEEETSTHGNQFANDAARLTHETSFVRAHTSFWTRIAISFYIGCFRQFY  
RSVRRVDYQTLRNGFISVHLAPGSKFNFQKYIKRSLEDDFKVVGVSPLVWASAVVFLLLNIDGWRTPLWAFLIPIIIL  
AVGTKLQVILARMALEITETHAIIQGMPLVQGSQDYFWLDQPQLVHLIHFALFQNAFQITYILWTWYTFGLENCFRGLY  
KLAVIKVACGVMLCLCSYITLPLYALVTQMGSRMKSIFDEQTSKALMKWHMTVKKKHVGEVVKLGKSTIDGSNIGSTL  
QSPGPALHRFKTTGHSTRSSTFEDQDEYESDNELEKTKLILRVDQLAEEDHRHHSEGEANNEDEFTFLKHTTIQS

>CaMLO11 Ca\_06880/LOC101511064

MAAENEQETRSLALPTWVAVSLLVERSINRLSIWLKTRNRKPLLEALEKMKKEELMLLGFISLLLTATSGM  
IANICIPSKFYNSAFDPCSQSEIDKEIEENGSEGRKLLMAASYPRIIRRVLNGINRNSCKVAGYEPFVSYEGLEQLHRFI  
FVMAITHVSYSCLTMLLAIKIHWSRVWEEEAHMRRNYLITEITRQMTMRRQSTFVKSHTSNPLVIWMTCFRQFGRSVV  
RADYTLTRKGFIMNHNLSKYDFHYSYVRSMEEFQRIYVGVSGLLWGFVFCFMLFNKGSNLYFWIAIIPISLVLLVGT  
LQQVIATLALENAGITGFTSGAKLRPRDELFWFKPELLLSLIHFILFQNAFELASFFWFWQFGYNSCFIRNHRLVYLR  
LILGFAGQFLCSYSTLPLYALVTQMGTYNKAALIPQRIRETIHGWGKLARRKRRHGMFIDDDSTIHTDTSTVLSIEEEDQI  
IDDSFKDLVTGTGVELQPVKTVTSISSPIANETSSRAVTPLLRPSASLSSVFPSSRHEPVIRSSSMPSGR

>CaMLO12 Ca\_09883/LOC101496809

MCISMYKRLSFCVVSFVWLLNGGVAMASSESSDSSRDLDQPTWAVACVCTVFILISITILEKSIHKVGTWLGGERHKA  
LLEALEKVKAEMLILGFISLLLTFTGQSYIVRICIPANMADKLLPCPYRHTGSKNEEHHKLLHRYLSEDPYQCKEGH  
KPLISVNGLHQLHILIFFLAVLHVLYSAVTMLLGRKIRGWKAWAETSSHGYDFANDPSRFRRLTHETSFVRQHATFWTK  
IPIFFYISCFRQFYRSVDKADYTLRNGFITVHLSAGSKFNFQKYIKRSLEDDFKVVMGVSPVLWASVFLVILLNVDGW

HAMFWASLIPVVIILAVGTKLQATLAKMAIEITERHAVIQGIPLVQGS DKYFWFGRPQLLLHLIHFALFQNAFQITYFLW  
IWYSFGLKNCFHADFKLAIKVALGVGLCLCSYITLPLYALVTQMGSRMKKSI FDEQTSKALKNWHNTVKKKHGLKLGK  
SSVRTMEGSTTDSVHSTPTLLRFKTTGHSTRSVSAYDDQDDYHSDIEMSPTSPTSNNLLVRVDHVEQHTIENEHQTEVK  
TIDKQPTMRGSFSFVKPDDHVERSTD

>CaMLO13 Ca\_07953/LOC101510624

MAEELNQSLEYTPTWIVAVVCSIIIVFISLCAERALHYLGKFLKKRSQTALYEALTKLEEELMLLGFISLLLT VTFQGLISD  
ICITPKHATQMLPCKRSDEGLEHEIH YDTIINKRRLFSSDSGSQHCRQEGKVPLLSLEALHHLHIFIFVLAVVHV VFCVV  
TMILGGVRIREWKSWEHQAQSMAISSSGETLRVEEAGFFDKYAQGYWRKAAVVGWLR SFKQFYGSVTKYDYLA LRHGF I  
KEHCNPKPSFDFHSYMIRTLEIDFKRVVGISWYLWLFVVLFLLLNLEGWHTYFWLAFPLI ILLLVGAKLEHIITR LAQE  
AVANVDRTERVKPSDEYFWFGRPAIVLHLLHFTLFQNAFEIAFFFWIWCTYGF DSCIMEKIAYVIPRLIMGVIVQV LCSY  
STLPLTYTIVTQMGSSYKFKDDMGESSL FHRMTKESNQHPQIGEQSIIMMENHAISSTIELSHTV

>CcMLO1 C.cajan\_46346

MVEEKRVYERTLEETPTWAVAVVCFVLLAISILLEHI IHAIGKWFKRKNKNALFEALEKVKGELMVLGFISLMLTVLQDP  
ISKICVSPKVASSWHPCANPKPFGTTEDKSGEDES GDDVEINSRKLQYYYETIPRRVLATKGYDKCF AKASSPSSLLF  
GKVAFVSAYGIHQHLMFIFVLAIFHILQCI VTLTLGRTKMRKWRANENETKTIEYQFYNDPERFRFARDTTFGRRHLNSW  
SQSAFSLAIVSFFRQFVGSVNVKVDYLT LRHGFITAH LAPGSDARFDFQKYIQRSL EEDFKVVVGISPII WFFAVLFLLTN  
THGWYSYWLFPFPLII ILLVGAKLQMIITKMGLRIADRGEVVKGAPVVEPGDDLFWFNRPRLLLF LIHLVLFQNAFQLA  
FFSWSTYEFSDSCFHETTVDIVIRLAMGII IQVLC SYVTLPLYALVTQMGSTMKPTIFNQRVASALKNWHNTAKKQIKN  
SKQTPFSSRSTPTHTGMSPIHLLQRHLAGRSDSAQTS PRASNYENEQWDLEGSPSPSNHAVASNETQM QVFEPGTTSEL  
PVSSQLEIRVSSSEFSFEKRHHEGGD

>CcMLO2 C.cajan\_07194

MGDKVQVLQKQLDQPTWAVAVVCLVMLAISIFIEHAIESLGKLLKKKHKALHEALEKVKGELMMLLGFISLLL VVFE DR  
ISDICISKEAASSWHPCGPD DKHKDPKGYDYKCAEKASLFP HFFIIYFHCIRYYQLKPTCFPSILFFDILQ GKVAVFSE  
YGIHQHLHIFIFVLAIFHILQCIITLTLGR TKMSIWRMWEDESKSLEHQFYHDPERFRFARDTTFGRRHLSSWSRSPISLW  
IVSFFRQFYGSVNVKVDYMLALRHGFIV AHLTPASEAKFDFQNYIKRTLEEDFVVVVGISPI MWFFAVLILLTNTHGWYAYF  
WLPFIPLII ILLVGTKLQMIITDMALRIQDRGEVVKGAPLVEPGDELFWFNRPRLVLSLIQLVLFQNAFQLA FFAWSTYD  
NGLKINSCFHRRTADIVIRLTMGVLTQV LCSYVTLPLYALVTQMGSTMKPTIFNDNVAAALKKWHHTARKHIKHKDSSH S  
AANTPFSSRPGTPTHTGMSPVHLLHKHPRHSDSPLTSPRAPHYHNEQWDVEGSPSPSHHARNHEDTMQPPTAELTP IGLQP  
IRTQHEINIALSEFSFGRGHHTNNSN

>CcMLO3 C.cajan\_32587

MAEDKIYERSLEETPTWAVAVVCFVLLAISIIIEHI IHAIGKWFKKKHKSALESLEKVKGELMMLLGFISMLLTVFEGPL  
SKICISQNVASTWHPCHKPKSDTGTNGRKLQYLELISRRVLA AKANDKCAEKAILMHYVAFNLQGRVAVFVSAYGIHQH L  
IFIFVLA VFHILQCIITLALGR TKMRRWKKWEDETKTIEYQFYNDPERFRFAKDTTFGQRHLNTWSHSSISLWIVSFFRQ  
FFGSVKKVDYFALRHGFITAH LAPGSDARFDFQKYIKRSLDEDFKVVVGISLTFWFYGWYSYWLPSIPLII ILLVGAKL  
QKIITKMGLRIQDRGEVVKGAPVVEPGDDLFWFNRPRLLLF LIHLVLFQNAFQLA HFAWSTYEF SINSCFHRSTADIVIR  
LTMGVVIQVLC SYVTLPLYALVTQMGSTL KPTIFNERVAAALKKWHHA AKNHVKDSKHCEANSTTAFCSRSSTPTFGMSP  
VHLLNRHLAGKSDSPQTSRPTS NYENEQDFENEPSTSTHSGTEETPMQVFGPPSTTELP ISTKLEHVHSSSDF SFEK

>CcMLO4 C.cajan\_12516

MGEENEGRSLAETPTYAVATVITVLVLSL SFLFQGLTKKLVKWL DTKRKSLLSALEKIKEELMLFGLLSLLMGHWIIFV  
AKICVKSSVLSRRFFPCAMDKNSAKRIVWPSS ESINKTDFKGLEISGRHNYCPEGHESLASYESLEQLHRFVFLVGVTHI  
TYSFIAVALAMIKIYSWRTWENEAKTTAIQSIQDTPQSTSSIRLRLSTFIFHRTSHPWSNHKILVWLLCF SRQFWSSIH  
RADYMALRLGFITNHELPLTYDFHNYMLRSMDEEFRDIVGVS VLLWVYAICCFLNFGHSNFYFWLSFVPAIIL IIGTK  
LHRVVKLAVEIVDRCPVIKPHRFNL RDELFWFGKPRFLRLIQLISFLVIFQNAFEMATFLWSLWEIKDPSCFMSNHTF  
IVIRLSFGVISQVWC SFITFPLYV IITQMGSRFKKT VVTENVRKSLSKWQRRVKDRQSSSYAVLTAISASSYGTVSN SRA  
SNSEEGSCSGIKDICLDNVSNTQENAPFQSYGDHHDHNNHNVNDDSSSPPPS

>CcMLO5 C.cajan\_34110

MEGRSLAETPTWAVAVVCFVLLSISIFIEHILHLIGKWLKQKQKSDLYESLEKIKSELMLLGFISLLLTVGQGVISRICI  
TEKVADTFHPCPKDHHQNTSARRLLSDNQNHRRI LAAGGSDKCPPGKVPFVSSEGIHQHLHIFIFVLA VHFVLYCILTAL  
GRAKRRWRKWEETKTA EYQFSHDPERFRFARETSFGRRHLKFWTQNLVLVWIVCFRQFVRSVPKVDYLT LRHGF MMA  
HLGPQSHMKFDFRQYIKRSL EEDFKVVVEISPIIWFITVFFLLFNTHGWYSYLWLPFVPLII ILLVGTKLQVIITKMGQR  
IEQRGEVVKGVPLVQPGDDLFWFKKPR LILYLINFVLFQNAFQMAFFSWTALQFRMTSCFHSETKDMAIRISMGVVFQFL  
CSYVTLP SYALVTQMGSTMKPTIFSGRVAKALRKHHTAKEHVQQRGLQSHNSLPCKPTTPKPPTSPAQLLRHCHS QMD  
TYPSSPTRSDSEAQYHYEIDSTSFDEH HHSKAVADSNSIQLHEMEMGH LAHDQPQRDNEPSSSTLEGLGLSHHEIHIEH  
TK

>CcMLO6 C.cajan\_34112

MAGRSLEETPTWAVAVVCFVLLSISIFIDHIFHLIAKWLQKHKKALFESLEKIKSELMLLGFISLLLTVGQGVISRICI  
TEKVADTFHPCPKDHHQNTSSRRLLSDNQNHRRI LAAGGTDKCPHGKVPFVSSEGIHQHLHIFIFVLA VHFVLYCILTAL

GKAKMRRWKRWEEETKTAEYQFSDPERFRFARETSFGRRHLKFWTQNPVLVWIVCFFRQFVRSVPKVDYLTLRHGFMMAL  
HLGSQSHQKDFRQYIKRSLLEDFKVVVEISPPWFIAVLFLLLNTHGWYSYIWLPPAPLI I I ILLVGTQLQVIITKMGQR  
IEQRGEVIKGMPLVQPGDDLFWFKPRLILYLINFVLFQNAFQLAYFSWTALQFGVKSCFHSHTEDLLIRISMGLFVQFL  
CSYVTLPLYALVTQMGSSMKATIFSERVAEAIKRWHTAKKQIKNNHGLASQSQTFFSSRPTSPAHLRHRSEIDTFLS  
SPIRSESLAHQPNIDISLSYFNSSHHRSKVNAASISIEMGHLAHDPPQNVKEPSSALEGSDPTQHEREFSFDKRLQI

>CcMLO7 C.cajan\_21483

MAGSGGRNLEETPTWAVSAVCFVLITISIIIEHIIHLIGKWLKKKHKRAMYESLEKIKSELMLLGFSLLLTVGQGPIS  
RICISEKVAGTWHPCSKDDESHDSSEDSQHGTNGRRLLAAFYASDTRRLLAGGGSHKCAQKVPFVSSDGIHQHIFIF  
VLAVFHVLYCVITMALGRAKMKRWKRWEEETKTPQYQFSDPERFRFARDTSFGRRHLSFWTKNPVLMWLVCFRQFVRS  
VPKVDYLTLRHGFIMAH LAPQSHSKFDFRKYIKRSLDEDFKVVVGISPPFFWFAVLFLLLNTHGWYSYLWLPFIPLI I I L  
LVGTQLQVIITEMGLRIQQRGEVLKGVPLVQPGDHLFWFNRPGLILYLINFVLFQNAFQLAFFSWSALQFGIRSCFHSHT  
EDVVIRITMGVLIQILCSYVTLPLYALVTQMGSTMKATIFNERVAVALRNWHQTAKKHIRQNRVGPLSLSGTPTSSRPTT  
PSHHMSPVHLLRYRSEADSFAPSPRRSNLDSQPWDNSNINVDSPSPSYSHHQLEMAPQTNDPTVDTTTHEIVVARHSKE  
FSFDKRPTTNT

>CcMLO8 C.cajan\_16636

MAEELSQSLEYTPTWIVAVVCSIIIVFISLCOVERAIHRLGKYLKKKQDTALYEALQKLEELMLLGFISLLLVTFQGLISH  
ICISPNLATQMLPCKIPHGSSEASEHDQIYYDAI INRRRLFSTDTGSEHCROKGIPLLSLESLHHLHIFIFVLAVVHAA  
FCVITMVLGGARIRQWKKWENFNKEYISSNKEYHEFFNIHTDGHWRRAAVVSWLRSFFKQFFGSVTKNDYLALRYGFVQ  
QHHPNVPEYDFYDMQRTLEVDFFKVVGISWYLLWLVVFLLLNLEGWHTYFWLAFPLILLLLLVGAKLEHIIARLAQES  
IDMMGKKGTKHKQVKPSDEYFWFARPALVLDLLHFILFQNSFELAFFFWIWCYGFDFSCIMEKISYIIPRLIIGVIVQVL  
CSYSTLPLYTLVTQMGSKIKADKVYESPLMGPEGGSSNSRRSNRMIKESNQAQIDEQAIIMVEDATSIIELPHIVQSPY  
ERPNASNIH

>CcMLO9 C.cajan\_01454

MSSSKLRNLFWGVLFWSWIFWGLAMAASDSSSSSRDLDTPTWAVAAVCTVFILISITILEKSLHKLGTWLGQKHKKAML  
EALDKVKAELMILGFISLLLVTFGQSYIVKICISEKIASKMLPCPYNYESTDSASDTEENHRRKLLSYERRYLAADTTSYK  
CSKEGHEPLLSVNGLHQLHILIFFLAVFHVLYSAITMLLGRKIRGWKAWAEETSTHDYEFADHASRFRLTHTSFVRAH  
ASYWTRISIFFYISCFRQFYRSVRKTDFTLRHGFINVHLAPGSKFNQKYIKRSLDEDFKVVVGSPVLWASVVVFL  
INVNGWRTPIWAALPIIIII LAVGTQLQAILARMALDITERHAVVQGMPLVQGS D KYFWFGQPQLVHLHIHFALFQNAFQ  
VTYILWIWYCFGVRNCFRTDYKLAMIKVAIGVVMCLCSYITLPLYALVTQMGSRMKKAI FDEQTSKALKKWHMAVKKKH  
GAVKLGKSSARTLDNGSPIGSTMSSPGPTLHRFKTTGHSTRSSTYEDQDDYESDDVEVSPVSQTTSFIVRVDPEQHAEE  
EEDHKHSHSEGEINDEAEFTVFKLPHPGQRTTT

>CcMLO10 C.cajan\_18941

MSGGGGDARQLDLTPTWAVAAVCAIIVIIISILLEKIIHKFAKMFEEKKKHALLEALEKIKAEMLMILGFISLLLVTFGQNY  
ISKVICPERFSYTMPLPCLPVEKRGGGHGEHGAAPHEEEGGEAEAEHHRLLSYERRFLSAEAGGHSCSELGHVPLISVNG  
LHQLHIFIFFLAVFHVLYSAITMTLGRAKIRGWKAWEQDHIVDQDALNDPRFRFRLTHTSFVRDHNFSFWTKTPVTFYFVC  
FFRQFFRSVRRADYLTMRHGFVTVHLAPGSKFDFQKYIKRSLDEDFKVVVGISPI LWASVVLFLLVNVHGWASFWVSFL  
PLLVLAVGTQLQAIITRMALDIKERHAVVQGIPLVQVSDKYFWFAWPQLVLYLIIHYVLFQNAFELTYFWWTWYEFGWAS  
CFYEDDSLMIVRVALGIGAQVVC SYVTLPLYALVTQMGSTMKKSIFDDQTSRALKQWHKNAK K K KASKGRAETRTL GASP  
GESPDVSPRPTTAEETEMAHEGATIVSTVDNEQQQYNNRDLDTGP

>CcMLO11 C.cajan\_18939

MAVAASGERSLQATPTWAVAVVCSVFV I I SVIIIEHGIHSLGKWFQKRHKKAMNEALEKIKAEMLMILGFISLLLVTFGTYV  
AKICIPESFGDTMLPCKKVKPDDDSNGRRLLSLDESVEWRRVLEAASGGGDCSQQGKVP LISQSGVHQLHIFIFVLAV  
FHIFYSVMTMVLARAKMKKAWAEETTSLEYQFTNDPARFRFAHQTSFVRRHSGWSRMPGIRWIVAFFRQFFASVTKVD  
YMTMRHGFINAHFAPNTKFDQKYIKRSMEDDFKVVVGISIPLWAFAIIFLLVNVYKWTTLTWLSLAPLVILLLVGMKLE  
LIIMEMAQEIQRDRTTIVRGVPVVEPNKYFWFNKPQWIIFLIHFTLFENAFQIAFFLWTWYEFKITSCFHENLPLILTRV  
VLGIALQIVCSYITFPLYSLVTQMGSHMKKAI FEEQTAKALKKWKQAKDKRKLKAGIEIASGETTPSHGTSPLHLLHK  
SKPSSHIEMDSVLYSPRSYQSDTDLSETEGSSHQQNEITQTHQPPRNGLTHDIDFSFEKL

>CcMLO12 C.cajan\_36621

MSVSKYKKLCLCLVSLFCFGCVAMASSESSSGSKELDQPTWAVACVCTVFILISLTLEKSLHKLGTWLRKHKKALLEA  
LEKVKAEMLMILGFISLLLVTFGQSYIVRICIPLNVADKLLPCKYVGTDNESSEEEHRRKLLSYERRYLSDEATPYQCGKG  
HQPLISVNGLHQLHILIFFLAVLHVLYSAVTMLLGRKIRGWKAWAEETSSHGYEFANDPSRFRLTHTSFVRGHASFWT  
RYSIFFYIGCFRQFYRSVKGADYLRNGFIAVHLSPGSKFNQKYIKRSLDEDFKVVVGSPVLWAAFVFLLLNVYG  
WHAGVWASLIPFFIIFAVGTQLQAALAMMAIEITERHAVVQGIPLVQGS D RYFWFGQPQLVHLHIHFALFQNAFQITYFL  
WIWYSFGLKNCFHADTEVAIVKVALGVGLCLCSYITLPLYALVTQMGSRMKKSIFDEQTSKALKKWHMAVKKKQGVKLG  
QSRVRAMDGSTTDSVHSSGPTLHRFKTTGHSTSHTMSTYGDQDDYHSDNELTSISPTSSLIVRVDHDEQEPAKEIEHHP  
TANNQ

>CcMLO13 C.cajan\_17246

MAEVLQRGRSLAETPTYSVASVVTVMVFVCFVLSYRFRGEWLRKTRRKALFASLEKIKEELMLLGLISLLLAQSARWI  
SEICVDSLSFSSRFYICSAQDLGTTENIMHESLSSFPDETTIPKGLNSGAFNQCAGHEPFVSYEGLEQLHRFLFVLGIT  
HVMYSLAVGLAMSKIYSWRRWENQAKMAIDGNLQGGKIKVMRRQTTFFVHHTSHPWRSRPILNWMLCFLRQFRSSIQKS  
DYLALRLGFITEHKLPLSYNFHKYVVRSMEDFHAAILGISWPLWLYAIVCIFVNIHGLNIYFWLSFIPAILVMLIGTKLQ  
HVVSTLALIMKQTGPSARTQVKPRDDLFWFKKPDILLWLIQFVIFQNAFEMATFIWTLWGFQEQSCFTRNHYMIITRLA  
SGALVQFWCSYMTVPLNIIVSQMGSRCCKALVAESVRESLSHWCKRVKHKSKHDSVHSHTARSVCSESTIDERDEITVV  
SGTLTRSSSLESLNQITVTSVDQLNFETPNPKDSIKVTEYLSESVYTNNTNPPQPSYNGEDHVGNGEEAKVDTLLDLFQ  
KT

>CcMLO14 C.cajan\_23778

MSGGGGEEGDTEFTPTWVVAVCTVIVAVSLAAERFLHYGGKFLKAKGQKPLFEALQKIKEELMLLGFISLLLTVTQNG  
ITKICVPPGLTRHMLPCDPNQAPNHESHFYHSHFFPGTARRLLAEAHSESETQTYCARKHKVPLLSLEALHHLHIFIV  
LAIHVHTFSLTLVFGGARIRQKHWEDSIKQNYETARVLKPKVTNVQOHDFIRGRFAGFGKDSAIVGWLVFSKQFYG  
SVTKSDYVTLRHGFIMTHCKSNPKFNFKYMIRALEDDFKQVVGISWYLVLFVIFLLLNINGWHTYFWIAFIPVILLLA  
VGTKLEHVITQLAHEVAEKHAAIEGDLVVQPSDEHFWFHRPRVFLIHFILFQNAFEIAFFFWIIVTYGFDSCIMGQVR  
YIVPRLVIGVFIQVLCYSYTLPLYAIVTQMGTTHYKRAIFNEHLQQNIVGWAQKAKRRKGLKAETESHSGQSAHSSGAG  
AGAGSATGIQLGSIFKKASAPGDSTSVPKADGN

>CcMLO15 C.cajan\_47280

MGGGGAEEGNNLEFTPTWVVAVCSVIVAVSFAAERFIHYGGIFLKKKNQKPLFEALQKIKEELMLLGFISLLLTVTQNG  
IVKICVPSVSWTHMLPCSFDLKEKEESTKTTSHFQTFSSSNISGIARRLLEESKSESENEHEPSTVTKLGHCAAKGKVP  
LSVEALHHLHIFIVFLAIVHVAFCVLTVVIGGLQIRQKHWEDSIVKENYETQPVLEPTVTHVQEHAFIQNRFTGFGKDS  
AVLQWVKSFFKQFYGSVTKLDYVTLRLGFIMTHCRGNPKFNFKYMIRALEDDFKKVVGISWYLVIFVIFLLLNINGWH  
TYFWIAFIPVILLLAVGTLKLEHVIQLAHEVAEKHSAIEGELVVQPRDDHFWFKRPHIVLFLIHFILFQNAFEIAFFFWI  
WVTYGFDSCIMGKRYIVPRLVIGVFIQILCSYTLPLYAIVTQMGTTHFKKAIFFDDQVQARLVGWAQKAKKKGLRGDNG  
QSSSHAGAGIQLGPMFRASATEDNVVPRNDGSE

>CcMLO16 C.cajan\_13783

MDIGKERTLEETPTWAVSVFCFFFLTISLIEGGLHKLTEILRKRKGSGLKALTTKTKTEMMKFGFMSFLLTISEVPI  
ICITKDVANSLPCKDAVDLTGLTSAPATRTSTSEFDIAPATNESTIEVNYCEAKGMVSLISSDGILQLNIFISFLAVFH  
ILFCTLTMLCLGKAKMRRWKRWEDETRTLEYQIANDPRRFQYTGQTLIGKRHLKFWSYHSPLLWVCFRQFYGSVSKDDY  
FTLRNGFIAANISLGSNFKFKFLSRTYDEDFEKVMGIRIWIWIFSIFFSAHEFYNYWLPFIPLVVALLAGAKLQV  
IITKMCVDSCKENPVIKGSLLVTPSDAHFWFHRPEWLLHLLKFILIQNSFQLAFFTTWTWYEFGRPRSCFNREKEDIAIRIA  
MGVAVQLLGCYVTLPLYALVTQMGSSMRREVFTESVSKGLKNWHKAKQSLCKNNSTSSKHSNSLHSTVGESSIRGAVDS  
VHNPDNVAVTSYSSPLTSEVEKRIAPTHEQEMSSSEIPTIEEENPKIITRGTYDGEISFGSSWKNVGSRRGIGEFGSIT  
EEDDAEKLELNP

>CcMLO17 C.cajan\_37300

MEENVQETRSLALPTWSVATVLTVFVAVSLLVERSIHRLSNWLRKTNRPPLLALEKMKELMLLGFISLLLTATSRMI  
ANICIPSKFYNSAFAPCTRSEIDEQMEENGSEERKLLMASVYPHLFRVNLNGINRSSCKEGYEPFVSYEGLEQLHRFIFV  
MAVTHISYSLTMLLAIIVKIHSWRVWEDEAHMDRHNLSLTEITKELTMRRQSTFVKSHASNPLVKNGLIIVTTCFFRQFGR  
SVVRADYLTLRKGFIMNHNSLKYDFHSYMVRSMEEFQRIVGVSGPLWGFVVAFMLFNKGSNLYFWIAIIPVSLVLLV  
GTKLQHVIAIATLALENAGITGFFSEAKLRPRDELFWFNKPELLLSLHIFILFQNAFELASFFFWWQFGYNSCFIRNHL  
YLRLILGFAGQFLCSYTLPLYALVTQMGTYKAALIPQRIRETIHGWGAARRRHRHGMFTDDSTIHTDTSTVLSIEED  
DQLIDTPGDPVTGPEVELQPVTTVTSSPPIANETSSRAVTPLLRPSASISSVQCSSKTEAIPRCSMPSGR

>CcMLO18 C.cajan\_37291

MEENEQESRPLAFTPTWSIAIVLTFFLAFSLLLERAIHHLSDWLKKTNQKPLAALAKMKEEMQLLGFVSLLLIATSDMI  
ANICIPKIFYNDAFAPCTRSEIAEETEKNDEEHKLLMASTNPRVIRRIILDDINKKSCNEGYPFVSHGLEQLHRYIFI  
IAVTHISFSLTMLLAIIVKIHSWRWENEAQIDPHNCSFSEIPRHVPALSQTSIMVHRSNPLFRNTFLIIVVACFLRQFW  
NSLVRSNYLTLRKGFIMVNSVCLKSKCFLEFENICTTRKIKICDENFVPLWGFVVALMLFNKGSNLYFWIAIIPIFL  
VLLVGTQLQHVVTLVLENAEITDFFSGAKLTPRDELFWFKKPELLLSLHIFILFQNAFELATFCWSWWEFGNSSCFNRN  
HLLVYSRLILGFIFGQFICSYTLPLYALVTMGTNYKAALIPESVRATIDVWGKAARRNRKQKVTDDFELEPLREETS  
ANNVSSRPVDPVLRPSASVNSELRFRTEIIPRSTSMPREI

>CcMLO19 C.cajan\_09813

MAAYASGYSLEHTPTWAIALVSFILISISIIIEHLIHLIKWLRKHKRIVEAIERLKESELMILGFMSLLLTVTQDAIEI  
CIPMKTADTMLPCRKRITNDTATNLDSCSAKNASKVALVSKHGIHQLMHFVFLAVMQIVYSFLTSLARAKMRHWKAWD  
EETQTIYEIANDPNFRYSRQTTFGRRHISTRASPVIYVWIKCFFRQFFHSEKVDYTLRHGFI SAHFSARNSNDFDQ  
NYIEQSLEEDFRIIVSISPMWFTVIFLLVDVHGWHVYLWLSYVPLMLVLVVGAKLEVIDEMALQMKDINNVTGTGTP  
VCPDKLFWFGHPGFVLTLIHYTLFVNAFELAFFIIVSTQFGINSYHEHRSFTIIRVVIIVAVQVLCYSYVTLPLYALVA  
QMGQVQSKALAKILKQWHVEVRERRRQKELVKFSFRHRNKSSEWGQGNKSAPEFSSTLGESENRSYDEGEIVEELEHS  
VTKASSSSDPPSFV



>CcMLO20 C.cajan\_24758

MKQPNI SNCP LI VHMANV SEGTLENTPTWAVTTVCVFLVISISIEQLLHLLARYFKRKRKSLTKALEKIESELMLLGF  
MSLLLTVSEKRIANICITKSVGETLLPCATMTFDVTKEETKCAEQGKVSLSVRKGVRELQYFIFYLALCHVISCILTFSL  
GMAKMRRWESWEAETRTLEYQFYDPRRFQLTRETSTFGKRHLNYWSNPNILFWPVCVLRQFYRSVPKVDFYFTLRGRGFI  
HFAEGSNFDFQNF IKRALEKDFGVVMGISWIIWIFSVLYIFLNANVFYSHFWLPFSPLMVLVLLVGTKLQGI VTHMCLDSD  
DKSQI IKGSLVLRPSDHF FWF GWP NLLHLI SFVLFQNSFQVAFFTWT S IRFGIRSCFHRIENI I IRVAMCVSVQILCG  
YVTLPLYALVTQMGTSMSKDVFAENVIRGIHIWREKAKKNVAHRNPHSQDSSLDTSLSLEISLESPSFRFDVSTSI LMDR  
SSDDNKHVAVTEENISSEQLGSFQGFHLQNTGKPRQF

>LaMLO1 AOCW01137726\_AOCW01137727

MAETRIYERTLEETPTWAVAVVCFVLLFISIIIEYSIHAVGKWFKKKHKALYEALEKVKGELMLLGFSLLLTVLQDPI  
SKICISKNVASTWHP C STPKASKTEEDSHSDENDTNSRKLQYLNPMRRFLATKGYDKCAAKGKVA FVSAYGAHQLHIF  
IFVLAIFHILQCIITLALGRTKMRRWKTWENETRTIEHQYYNDPERFRFARDTTFGRRHLKKWSESSISLWMVSFFRQFI  
GSINKADYFALRHGFIMTHLAPGSDAKFDFQKYINRSLEEDFNVVVGITPLIWFCAVLFLLTNTHWYSHFWLPFIPFII  
VLLVGTKLQMIITKMGLRIQDTGEVVRGAPLVQPGDELFWFNRPFLFLIHLVLFQNAFQLAFFTWTSTYEFGLHSCFHD  
TTADIVIRVTMGVLVQFLCSYVTLPLYALVTQMGSTMKHTIFNDRVATALKNWHHTAKKHVKDSKHASANVTPFSSRPTT  
PTHGLSPVHLLQQHGRSDSTQTSPTS NYENEWDIEGSASPTKHIIGEGDETQILEQDSTTQLPISSEHEISISVSEF  
SFEKRLHRDYE

>LaMLO2 AOCW01065981\_AOCW01147792

MGEKVYERTLEETPTWAVAVVCFVLLFISIIIEYIIHAIGKWFKKNHKKALYEALEKVKGELMLLGFSLLLTVFQEPIS  
KICVSKNVASSWNP C STPKASKTENHSDNTNSRKLQYLEPMHRRILATKGYDKCAEKGVAFVSAYGIHQHIFIFVLA  
IFHILQCIITLTLGRTKMRRWKTWEDETRTIEYQYYNDPERFRFARDTTFGRRHLKNWSESSISLWVVCFFRQFIGSISK  
VDYFALRHGFIMAH LAPGNDAK FDFQKYINRSLEEDFNVVVGITPIIWFVTLFLLTNTHWYSHFWLPFIPFII VLLV  
AKLQMIITRMGLKIQRGEVVRGAPLVQPGDELFWFNRPFLFLIHLVLFQNAFQLAFFTWTSTYEFGLHSCFHD  
TADIVIRVTMGV VVQILCSYVTLPLYALVTQMGSTMKHTIFNDRVATALKSWHHTAKKHVKDSKHASASVTPFSSRPATPTHGL  
ISGTPVQAPRPSDSTQTS PRASNYENEWDIEGSASPNNHNTINIGEGYETQMQLVLEPDSTTELPISSEHEISLSVSDF  
SFEKQHIGRDYE

>LaMLO3 AOCW01159416

MEENGKRRSLDATPTWAVATVITLMVSL S F M F Q I T L E K F G K W L D R T K R K S M L S A L E K V K E E L M L F G L L S L L M G H W T I F V A  
KICVKS SVLKTRFIPCAIEKNSGTVEHIFWLSSEYSNRMTLEENVNKGHLNYCPEGKESFASYESLEQLHSLLFVLGVTH  
VFYSFIAVALAMIKIYSWRIWESDAKTMATQSFQDTPQNTLNIRLSRLGTFIFHHTSHPWSSHKILVWLLCFSRQFWSSI  
NRADYMALRFGFI TNHELPLTYDFHNYMLRSMDEEFRDIVGISVPLWIYAICCIILNFHGSNIYFWLSFLPSILILMIGT  
KLHRVVVKLAVEITSHCQDTRPLNLRDELFWFGPKLLLLRLIHLISFLNAFEMATFLWLSWEIKEASC FMKNRTFIMIRL  
SFGVISQVWGSFITFPLYVIITQMGSKMKKSVISENVRKSLSKWQGRVKNRQGS SLMHDYESFPSCEDYHHHN

>LaMLO4 AOCW01114694\_AOCW01136624

MAGGIGGRNLEQPTWAVAVVCFVLISISITIEHTIHLIGKWLTKKNRSLYESLEKIKSELMLLGFISLLLTIGQSLIS  
KICISEKVARTWHP C SDKEDHTSSKNETNQRLLIATTLFFGLESENPRRVLAGGSDKCGKGVFPVSTDGIHQHFRFI  
FVLAGFHVLYCILTTLGRAKMRRWKQWEEETKLEYQFSDHDPERFRFARDTSFGRRHLSFWTKNPLLIWIVCFFRQFVR  
SVPKVDYLTLRHGFITAH LAPQSQQKDFRKYIKRSLEEDFKVVVGISPLFWFFAVMFLFNTHGWYSYLWLPFIPLI  
LLVGTKLQVIITKMALS IQQRGEVLKGMPLVQLGDHLFWFNRP SILIHLINFLVLFQNAFQLAFFAWTSFEFGIKSCYHSH  
TEDVVIRISMGVLIQILCSYVTLPLYALVTQMGSSMKASIFNERIAMALRNWHHRAKKHKQNRNGSLSMTPISSRATTP  
THMSPTHLLSHYRSQIDSSYYASPRRSIEIEDSPSTSYSHHKNKAKVDYFFDPTPSTTTTTSTNHHEIEMDQHINEV  
NPTTTQHEIVIAHHSKEFSFDKGTQSSAQNTSKLGR

>LaMLO5 AOCW01127929

MAEELNQSLEYTPTWIVAGVCSIIIVFISLIVERCLHWLGKYLKREKQTALYEALIKLQEELMLLGFISLLLTVTQNIISD  
ICIPPKLATQMLPCKRPHESSEESTHRLIYYDTIINRRRLFSTETGFEHCKEKGVPLLSQEALHHLHIFIFVLAIVHAI  
FCVTTMLLGDHLYIRNGIDLKFPFISVFSYDDYHHHEFFKKHADGYWRAAVVGWLI SFFKQFYGSVTESDYTALRQ  
GFIKEHCCHKPDFNFHKYIMRTLEVDFKKIVGIRWHLWLVVFLVLLNLHGWHYTFWLSFLPLIILLVGAKEHIIVRL  
AQESVEKLAEGNFVTQAVGNLGRRKEQDAKPVKPSDGYFWFNRPALVLDLLHFTLQNSFEIAFFFFWIWCTYGFDS CIME  
KIGYIIPRIIMGVIVQVLC SYSTLPLYTLVTQMGSRFKGMFDEVEAGILSWAGKSISGADDESSEPPDRRTMSHKMIK  
ESFQPSQISGQAIMVEDETTSTIELPTLSKFH

>LaMLO6 AOCW01133085

MGGGGGGEGGHGHTDNRLEETPTWSVAMVCAVIVIIISISLEKFIHKFAKVFEAKKLLALLEALEKIKAEMLVLFISL  
LLTFGQSYISKVCVPQYYANQMLPCS RKKSHGPP E EGHDTGGGGGENEAAEHRRRLLSYERRFLAGGGGFVECKLGSEPL  
ISVGLHQLHIFIFFLAVFHVIYSAITMTLGRAKIRAWKQWEQSHLVDEDALNDPRRFLTHETSFVRDHSSFWTKTPVS  
FYFVCFRQFIRSVRRADYLTMRHGFVSVHLAPGSKFDFQKYIKRSLEEDFKVVVGISPI LWASVVLVLLVNVNEWHASF  
GLSFLPLAVVLSVGTKLQAIITRMALDIKERHAVVQGIPLVQVSDKYFWFQWPQLVLYLIHYVLFQNAFELTFFCWTWYE  
FGLNSCFYENKLMYFRVAVGVGAQIVCSYVTLPLYALVTQMGSTMKKSIFDDQTSRALKKWHKNALKKANSKGRGTEIR  
TLGGS PRHS PRASENAYS NIAVTETQMTEQTHQGL

>LaMLO7 AOCW01138453

MGGGGDAGAGSHGHGDNRTLEQTPTWSVAAVCAIIVIISISLEKLIHKFASMFEEQKKLALLEALEKIKAEMLVLFISL  
LLTFSQSYISKVCVPHHYANQMLPCSRPEESYGAHGGPKEEGEGEDEGEHRRRLLSYERRFLAGGGGMVNCKPGYEPLI  
SVNGLHQLHIFIFFLAVFHVIVSAITMTLGRAKIRAWKEWEQDHLIEEDALNDPRRFRLTHEISFVRDHNSFWTKTPI SF  
YFVCFRQFIRSVRRADYLTMRHGFSVHLAPGSKFDFQKYIKRSLEDDFKVVGISPLLWASVVLFLLVNVHEWHAAFV  
LSFLPLSVVLAVGTKLQAIITRMALDIKERHAVVQGIPLVQVSDKYFWFQWPQLVLYLIHFVLFQNAFELTFFCWTWYEF  
GLGSCFYEDKFFMFFRVAIGIGTQIVCSYVTLPLYALVTQMGSTMKKSIFDDQTSKALKMWHKNALKKANSKGRGTEVRT  
LGGSPGHSPPHSPHANGNAGTNIIVAAETQMTQQNAAAIAATNADHNQOQYENIDLSSGP

>LaMLO8 AOCW01146534

MSKSKLKKLLFYVLFVSMVWFGSYGMAASESSGNSRELDQTPTWAVAAVCTVFIILVSITLEKSLHKLGTWLGHRQKMALE  
EAEKVKAEMLILGFISLLTTFGQSYIVKICISASVADKMLPCPYREKGTNNASSSGGEHRRKLSYERRYLAA DATSYK  
CSDEGHVPLLSVNLHQLHILIFFLAIHVLVSAVTMLLGRKIRGWKAWEEETSTHGYELSIDASRFRLTHTSFVRAH  
ASFWTKISILFYIGCFRQFYSSVGKVDFTLRNGFIAVHLAPGSKFNFRKYIKRSLEDDFKVVGVSPLVWASVVVFL  
LVNNGWQTRIAALIPVVIILAVGTELVILTKMALEITERHAVVQGIPLVQASDRYFWFGQPQLVHLIHFALFQIAFQ  
ITYILWTWYSFGLTNCFRIDYKLAVALGIMVCLCSYITLPLYALVTQMGSSLLKKSIFDEHTAKALRKWHMTVKKKQ  
GVVKLGKSTMRAMDMDGSTTIGSTKLHSSRPTLHRLKTTGHSTHTSIYEDEDEYQSDIQLSPTSSTTLVVNVNDNGHQOQ  
VEENTEETNIQGDFSFVKPSPIEKNHVDVLL

>LaMLO9 AOCW01154130

MSVSKYKLCFCVSWFCYEVGLVMGSSNEKSGSSRELDHTPTWAVAFVCTVFIILISITMEKSLHKVGMWLQQRHKSL  
LEAEKVKAEMLILGFISLLTTFGQRYIVRICIPAKVANKLLPCPLKDKHRTKLVSYEHRYLSEDTTSLRCKGRYVPLLS  
VTGLHQLHLLFFLAILHVLVSAVTMLLGRKIRGWKAWEEEIASDRFEFDNDRSRFQFTHDTPFVRAHATFWTRYSVFF  
YIGCFRQFYRSVRKADYVTLRNGFITVHLAPGSKFNFKYIKRSLEDDFKLVVGI SPVLWASVVFVLLLNFNGLQAMYW  
ASLIPLIILVVGTKLQATLANMAIEITDRHAVVQGMPLVQGS DKYFWFGRPQLILHLIHFALFQNAIQITHILWIRYSF  
GKETCVHAGDILAIKVALGVVVLCLCSYITLPLYALVTQMGSTMKKSIFDEQTKKALKKWLMDAKKNKGSKAGKSTVRT  
ADGSTNGSTIHSSGPTLHRFKTTGHSTRTRTISPDPYNDHSDIEMSPMLPTSSLIIVRVDHGDQEAKEENEHQV

>LaMLO10 AOCW01039454\_AOCW01039455

MSNSNFKKMLFFFLFSMPWFVNGSGMAASEGSNDSDRLDQTPTWAVA AVSTVFIILISITLEKSLHKIGTWLGHKQKMALE  
EAEKVKAEMLILGFISLLTTFGQSYIVRICIHANVAAKMLPCPYRDQNTDNEFGNEEEHRRKLVSYQRRYLAA DTTSYK  
CTNEGHVPLLSVNLHQLHILIFFLAIHVLVSAVTMLLGRKIRGWFHQCYFEIVLYETLRDTSRFRLTHTSTCGKAHA  
SCWTRSSMFFYIGCFRQFYRSVGKVDFTLRNGFIAVHLAPGSKFNFKYIKRSLEDDFKVVGVSPLVWASVVVFL  
LVNNGWQTRLWATLIPVAIILAVGTKLQAILTKMALEITERHAVVQGIPLVQASDRYFWFGQPQLVHLIHFALFQIAFQI  
TYILWTWYSFGLRNCFRVDYKLAVALGIMVCLCSYITLPLYALVTQMGSSLLKKSIFDEQTSKALKKWHMTVKKKHG  
KVKLGKSTVRSMMDGSTIGSTTLHSSGPTLHRFKTIGHSTRTSTYEDEDEDEYQSDIEFSPISTSMNLIVKVDHGHEQO  
GEENREEANIEGEKRTMT

>LaMLO11 AOCW01135152

MSMSMYKVSFCVFWLWLCYGILGMGSSSESSNSSRELDQTPTWAVACVCTVFIILISITMEKSLHKVGLWLQQRQKALLE  
ALEKVKAEMLILGFISLLTTFGQSYIVRICIGANIAEKLLPCPYNSEGIGNESSKDEHRRKLLSYEHRYLSEDTTSYHC  
KEGHVPLLSANGLHQLHILIFFLAIHVLVSAVTMLLGRKIRGWKAWEEETSSHGFEFATDPSRFRLTHTSFVRAHAT  
FWTRYSIFFYVGCFFRQFYRSVRKADYQTLRNGFIAVHLAPGSKFNFKYIKRSLEDDFKIVVGVSPLVWASVVVFL  
LVNNGWHAMIWASLIPVVIILVVGTLQATLANMAIEITERHAVVQGIPLVQGS DKYFWFGRPQLVHLIHFALFQNAFQIT  
YFLWIWYSFGLKNCFHADYELAIKVALGFVVLCLCSYITLPLYALVTQMGSRMKSIFDEQTAKAIKWHMAAKMKHGL  
KLGKSSVRTADGSTTVGSTIHSSGPTLHRYKTGHSTRTLSSYHDQDDYHSDIEMSPVSRTRSRLYVRMDDGEQEAENEH  
LHVGETNHGDDGLTNVKPAPL

>LaMLO12 AOCW01152069

MGDVHEAGRSLAETPTYSVASVITVMVFLSFLVRSIYRFGWLKKTRRKALFASLAKIKEELMLLGLISLFLAQSARWI  
SEICVDSLSLFTSQFYTCQQEISATNHKIMLQTSPPFPPESTTVAKEVNNVAFHQCREGHEPFVSYEGLEQLHRFLFVL  
GITHVLYSCLAVGLAMSKIYSWRKVENQATMAADGNLQAKKIKVMRRQITFISHQTSHPWSRSRNP LLIWMLCFLRQFRS  
SIQKSDYLALRLGFITEHKLPLSYNFHNYMVRSMEDFQAILGISWPLWIYAIVCIFVNIHGLNIYFWLSFIPALVVMLI  
GTKLQHVVSTLAIIEILEQTGPYARTQVKPRDDLFWFKKPDILSWLIQFVMFQNAFEMASFLWTLWGFKEQSCFMRNHMI  
IIRLTSGVLVQFWCSYMTVPLNVIQSQMSRCKKALVAESVRESLHWSCKRVKQKSKHDSLHTARSVCSIESTIDEITVV  
SGTLTRSSSLEYMNQLTIVTSVDQLNFHTCDNNNQDSIHVANGEEQNVQVTLHLHFQKT

>LaMLO13 AOCW01152789

MGGGGEDTTLFETPTWVAGICTVIVAIISLAAERVLHYCGLFLKRKNQKPLYEALQKIKEELMLLGFISLLTIVTQNSI  
TKICVPSAFTHHMLPCTFQSHSQTHSHSQITFSFPFRRLLSHADANFCSHKDKVPLLSLEAIHHLHIFIFVLAIVHVT  
FSVLTVLFGGTKIRQWKHWEDSIAQQNYETNRVLKPKVTNVQQHDFIKGRFSGFGKDSALMGWLLSFFKQFYGSVTKSDY  
VTLRLGFIMTHCRGNPKFNFKYMIIRALEDDFRQVVGISWYLVWFVVI FLLLNINGWHTYFWIAFIPFFLLAVGKLEH  
VITQLAHEVAEKHAAIEGELVVRPSNDHFWFQRPQIVLFLIHFILFQNAFEIAFFFWIIVWVTYGFDSCIMGQVRYIIPRLI

IGLFIQVLCSYSTLPLYAIVTQMGTYNKKAI FEEHVQVGLIGWAQKAKMKKEQKADSQHESGQSSHVGIQLGQLFPKRA  
SAPQDNTPFPKPDGST

>LaMLO14 AOCW01138218

MSGGVEEGSSLQFTPTWVAVLVCVIVAVSLAVERLLHYGGMFLKKNQKPLYEALQKIKEELMLLGFISLLMTVSQNS  
ISKICVSKSWTEHMLPCSREDLEKEGSKTPI SHFQTFSSFGNARRLLSEGQAPEVKSGYCSSKNQVPLLSIEALHQLH  
IFIFVLAIVHVTFCVLTIVFGGLKIH EWKNWEDSI AKENYETQRVMNPKVTHVQQHAFIKDHFTGFGKDSLLGQVKAFF  
KQFYGSVTKLDYVTLRLGFI MTHCRGNQKFNFKYMRVRALEDDFKIVVGISWYLVIFVVLFLLLNLSDWHTYFWISFVVF  
ILLLSVGTKLEHIITQLAHDVAEKHAAIEGELVVQPSDDHFWFHRPYIVLFLIHFILFQNAFEIAFFFWI WVTYGFDSCI  
MGQVSYIFPRLIIGVFIQVLCSYSTLPLYAIVTQMGTHFKKGFIDEQVQARLVGWAQNAKKKGVKGDSDQHGEQSSHSNGA  
GVVQLGSIFKKQSAPEDNAIVPTNEESKLI

>LaMLO15 AOCW01116641

MAENVEETRSLAMTPTWSVATVLT V FVAVSLLVERS IHRLSNWL RKTNRNPLFAALEKMKKEELMLLGFISLLLTATSRMI  
ANICIPSKYNSAFAPCTRSEINEEMEDNGSGERKLLISSAYPHLLRRMLNGINRSSCKEGHEPFLSYEGLEQLHRFIFV  
MAVTHISYSCLTMLLAIVKIHSWRVWEDEAHMDRHNLSNMTMQRQSTFVKFHTSNPLASNSVLVWVTCFFRQFGHSVVRA  
DYLTLRKGFI TNHNL SKKYDFH SYMIRSMEEEFQRI VGVSGHLWGFVFAFMLFN I KGSNLYFWIAVIPISLVLLVGTKLQ  
HVIATLALENAGITSFFSEAKLKPRDELFWFKPELFLIHFILFQNAFELASFFWFWQFGYNSCFISNHLLVYIRLI  
LGFAGQFLCSYSTLPLYALVTQMGTFKAAIIPQRIRET I HGWGKAARKRRHGMFPDDSTIHTDTSTVLSIEEDDEFID  
DTPTTGTGTGTGVELQPITTTITSSPLPAAANETSSRAATPLLRPSASISLSSPSSARAEAVARCF SMPSGRH

>MtMLO1 Medtr6g033330

MAEDKVYERTLEETPTWAVAVCVFVLLAISIVIEHI IHAIGKWFKKKNKNALYEALEKVKGELMLMGFISLLLT V FQDYI  
SKICISEKVGSTWHPCTPKTKTASN DENSE SENHDRKLE YFDPNRRILATKGYDQCADK GKVALVSAYGIHELHIFI  
FVLAIFHLLQCIITLALGRFKMRRWKKWEDETRTVEYQFYNDPERFRFARDTTFGRRHLSMWTKSPISLWIVCFRQFFG  
SISRVDYLALRHGFIMAH LAPGND AEFDFQKYISRSLEKDFKVVVGISPTI WFFAVLFLLTNTHGWYSSYWL PFLPIII  
LLVGAKLQMIITKMLRIQDRGEVIK GAPVVEPGDHLFWFNSPNLLLF I IHLVLFQNAFQLAFFSWSTYEF SINS CFHRT  
TADNVIRVSVGILIQFLCSYVTLPLYALVTQMGSTMKPTIFNERLATALKWHHTAKKQVKHNKHSNNTTPYSSRQSTPT  
HGMSPVHLLHRQTFGNSDSLQTSRPTS NYENEQWDVEGGGSTSPRNNQTVASEIEIPIV EFSSTTELPVSVRHEIGTTSS  
SKDFSFEKRHIGSN

>MtMLO2 Medtr5g022400

MVEENREEGRSLAETPTWAVATVITLLVSL SFLSNGTLKKLVKWLGRTKRKSLLSALEKMQEELMLFGLLSLLMGHWIIF  
VAKICVKS SVLSSRFFPCALKE SFGIVKHNVWSNLEYSNKTILKEQVNN DGLHNF C PKGHESFASYESLEQLHRFVFLG  
ITHVSYSFVAVALAMIKIYSWR TWENEAKTMAIQSLQDTSQSTSTSSIRLKR LSTFIFHQASHPWSHKILVWLLCF SRQ  
FWSSISR TDYMALRLGFI TTHDLPLTYDFHNYMLRSMDEEFRDIVGVS VLLWIYAICCIFLNFHGNNFYFWLSFVPAILI  
LIIGTKLHRVVKLAVEVIDHSPYMKPHRFNLDELFWFGKPRLLLRILQIISFLNAFEMSTFLWLSWEIDDPSCFMDNR  
TFIAIRLSFGVVSQVWC SFITFPLYVIVTQMGSRFKKTVISESVRKSLSKWKQRRVKEKQSSSYELLNTSTTTSL E SLLHG  
MDNSNHSDLISEIEEGSSSGIKDICHSNFDDVSMIQSNAKIPSYDEDEYHDHYHDVKHDLPPPPLS

>MtMLO3 Medtr2g093750

MAGGSVGRSLTETPTWAVAVCVFVILSISIFIEHIFHII EKWLK KKKHKSALYESLEKIKSELMLLGFISLLLT V GEG LIS  
RICISEKVAATWHPCSNNANIESDDEELIDHETGGSRLLAALLASQGDNHHRILAGGGGDKCAEEGKVA FVSAGAIHQ  
HIFIFVLAVFHILYCILTLALGRAKMRRWRWEEATKTP EYQFSDHDPERFRFANETSFGRRHLSFWTKNPVLIWIVCFR  
QFVRSVPEVDYTLRHGFMMAH LAPQSHLKFDFRQYIKRCLEEDFKVVVGISPP I WFITVFFLLFHTHGWHSYWL PFLP  
LIIVLLVGTKLQV IITQMLRIQKQGMVVKGE PVVQPRDDLFWFNKPRLILFLINFLVLFQNAFQLAFFSWTALQFGVTSC  
YNSRKDGVVIRICMGVFVQILCSYVTLPLYALVTQMGSTMKPTIFNERVATALRNWHHTARKNIKHNRGSGSQTPFSSRS  
ITPARMSPAQILRHRYNQMDTPTRLNFETSHHYESYSPSPSN SHHKVE INVASSSSTHLHEMEMGHLA HVEQQEVIK P  
NSISVSGSRPQFEIDIQQSDELSFSTMP TNQLE

>MtMLO4 Medtr2g028470

MAEELNESLEYTPTWIVAVVCSII V F ISLCAERALHRLGKYLK RKKQKALYRALNKLQEELMLLGFISLLLT V FQGVIS  
HICISPEHATQMLPCKRSHE SVQGSEHDHYDTI INRRLLSTDTGSQHCRLEGKVPLLSLEGLHHLHIFIFVLAVVHVVF  
CVT TMI LGGARIRQKSWEDHARKKT TNSSGETLRSEIDEFFNKHAQGYWRKAAVVGWFRSFFKQFYGSVAKYDYLALRH  
GFIKEHPNDPNFNHFSYITRTLEVDFR K VIGISWYLVLFVVLFLLLNLEGWHTYFWLAFPLI I LLLVGAKLEHIITRL  
GQESVAKEYPTERVKPSDEYFWFNRAI VLDLLHFTL FQNSFEIAFFFWI WSTYGF DSCIMEKVAYIIPRIVMGVIVQVL  
CSYSTLPLYTLVTQMGSRGKLDKVDKAE MESSPLFHRMTKESNQSQIGEQAIIMMEDHAISSTIELHPIIQSPLEKT

>MtMLO5 Medtr3g115960

MGGGGGGGDSRQLDVTPTWAVAAVCAIIVI ISILLEKLIHKFASVFEERKKHALLEALEKIKAEMLV LGFISLLLT V FGQN  
YISKVCIPVKYSNTMLPCQPLAERTADHPGEPAL EPQGTEHEPTPNIPAGEGESKGEHRRLLSYERRFLGGGGGGPGCK  
PGFTPLISVDGLHQLHIFIFFLAVFHVIFSAITMTLGRAKIKGWKEWEQDHLVDE DALNDPRRFR LTHE TSFVRDHNSFW  
TKTPVTFYFVCFRQFLRSVRRADYLTMRHGFVSVHLAPGSKFDFQKYIKRSLEDDFKVVVGISPI LWASVVLFLLVNVH  
GWHASFVVSFLPLAVILAVGTKLQAIITRMALDIQERHAVVQGIPLVQVSDKYFWFEWPQLVLYLLHYVLFQNAFELTFF

WWTWYEFGWASCFYEDDSLMIVRVALGVGAQFVCSYITLPLYALVTQMGSTMKRSIFDEQTSKALQNRKNAMHKKPSKG  
RSKETRTLGGGEAGSPVHSPHLHDDGSETELQEHNTATIVTSVDRNDHYDNHDLGSGP

>MtMLO6 Medtr5g024700

MFKRVSCLCLFYGGLSMAASDRNSSRSLDQPTPTWGVAAVCTVFIILISIALEKSLHLKGTWLGKREKALLEALEKVKA  
ELMILGFISLLLTIGQNYIVRICISEKIANKMLPCPHKIYIGGDKKSNKVEQNRIPVSFEGRYLAADTPSFKCSRKGHEP  
LLSVNGLHQLHLILIFFLAVFHVIFYSAVTMLLGRKIRGWKEWEEETLTHGYEFANDAACLRLTHETSFVRAHTSFWTRVY  
IGCFRQFYRSVRKVDYQTLRNGFINVHLAPGSKFNFKYIKRSLEDDFKVVVGVSPLVWASAVVFLLLNIDGWRTPIWA  
FLIPIIIILAVGTKLQVILARMALEISERHIVVQGMPLVQGSDFYFWLQGPQLVHLIHFALFQNSFQITYILWTWYSFG  
LENCFRLDYKLAIKVAFGIVMLCLCSYITLPLYALVTQMGSRMKSIFDEQTSKALKKWHMTVKKKHVKLGKSTIGTMD  
GSTIVGSTMQSPGPALHRFKTTGHSTRSSTIDEQDEYELSDNELMETNLIVRVDHDEQEAEDRHHHSEGEANNDFFTFFK  
HVIKRLV

>MtMLO7 Medtr2g006280

MEHAVEQGRSLAETPTYSVASVVTVMVFVCFLVERSIIYRFGKWLKTRRKALFASLEKIKEELMLLGLISLLLAQSARWI  
SEICVNSSLFSSRFYTCSEQDLPMIEHVMIVNSSSFSDETTIPKGLYSGALHQCCEGHEPFVSYEGLEQLHRFLFVLGIT  
HVLYSCLAVGLAMSKIYSWCRWENQATMALIDGNLQGNKVMRRQTTFFVHHASHPWSRNPILIWMLCFLRQFRSSIQK  
SDYLALRLGFITEHKLPLSYDFHKYMVRSMEDEFHGILGISWPLWVYITVICIFVNIHGLNIYFWLSFIPAILVMLIGTKL  
QHVVSIILALEIWQQGPSARTQVKPRDGLFWFKKPDILLWIIQFVIFQNAFEMASFIWTLWGFKKSCFMRHHYMIIRL  
TSGVLVQFWCSYMTVPLNIVISQMGSRCKKALVTESVRDSLHSWCKRVKQKSKHDHSLHSHTARSICSESTIDERDEIT  
VVGTLTRTSLDLESLNQITVTSVDQLNFSNNLQDSTDLSEPVHINSHYNDVINGEAKVETLLDLFHKT

>MtMLO8 Medtr3g115940

MAGGAPGERTLKETPTWAVAAVAVFVIIISVLIIEHGIHKLKWFHKKHKKAMSEALEKIKEELMLLGFISLLLTFTGTYI  
AKICIPNKLGDMLPCKKGEVEEESKDDRRRLSFDENVVWRRLAPAAGDDYCSNKGQVPLISQSGVHQLHIFIFV  
LAVFHIFYSVMTIVLARAKMQKAWETETSSVEYQFTHDPSRFRFAHQTTFFVKRHSGWSEKPGIRWIVAFFRQFFASVS  
KVDYMTMRHGFINAHFAPDSKDFHXYIKRSMEDDFKVVVGVISVPLWAFAIIFLLMNVYNWYTLTWLAPLVLILLVGT  
KLELIIMEMAQEIQRDTTIVRGVPEPNKYFWFNRPHWIIFLIHFTLFQNAFQIAYFLWTWYEFTITSCFHENLPLIV  
TRVVLGVALQVLCYITFPLYALVTQMGSHMKRGIFEEQTTKALKKWKQAARDKRKLNRNAGSIEIPSVSGDTPSQGTSP  
LHLLHKFKPSNQTDTSVLYSPRSYQSETDFSDTEGSTHQLNLNQIMSPQHPAGNNQNHNDIFSDFKP

>MtMLO9 Medtr3g118190

MSGGEGEGEENTLEFTPTWVAVGCTVIVAVISLAVERLLHYGGKFLKSKDQKSLYEALQKIKEELMLLGFISLLLTVSQ  
NRLTKICVPPGVLRLHMLPCSLEDKKESSHSAFSPGRIARRLLADRLAEESESAEPLKTGFCGRKNKVPLLSVEALHH  
LHIFIFVLAVVHVTFVSVLTVVFGGARIRQWKHWEDSIAKENYDTNKVLKPKLTHVQQHEFIKGRFSGFGKDSALIGWLQS  
FFKQFYGSVTKSDYVTLRLGFITTHCKTNPKFNHFKYIMIRALEDDFKQVVGISWYWLWLVVIFLLLNINGWHTYFWIAFV  
PVILLLSVGTLEHVITQLAHEVAEKHAAIEGDLVVQPSDNHFWFHRPHIVFLFIHFILFQNAFEIAFFFFIIVWTYGFDS  
CIMGQVRYIVPRLVIGVFIQVLCYSYTLPLYAVVTQMGSHFKRAIFNDHVQVGVIGWAEKVKKKKALKADGQPSQSSHI  
HEGSTGSSTGIQLGSVQKRASAPEDTTSVTKPEGSN

>MtMLO10 Medtr8g073130

MFMSKYQRLFLCLVLFVAVLYNGSVAMAASSEDGSSKDLKPTWAVGCVCTVFIILVSIILEKSLHKIGTWLGDRHKA  
LLEALEKVKAELMILGFISLLLTFGQSYMVKLCMPANATDIMLPCQSRATRDANDDEHHRKLLYERYLSEDGAPYN  
CKEGQEPLISVNGHLHILIFFLAVLHVIYSAVTMLLGRKIRGWKAWAEETSSHGYEFATDPSRFRLLTHETSFVRQHA  
TFWTKIPIFFYISCFRQFYRSVEKSDYTLRNGFIAVHLSPGSKFNFKYIKRSLEDDFKVVVGVSPVLWASVVFVFLV  
NVDGWHAMFWGSLIPVIIILAVGTKLQVTLKMAIEITERHAVVQGIPLVQGSDFYFWFGKQLLLHLIHFALFQNAFQI  
TYFLWIWYSFGFINCFHADYKLAIKVALGLVVLVLCYITLPLYALVTQMGSTMKKSIFDDQTSKALKKWHNTVKKKHG  
VKLGNSSVRTRDGSSTDSVHSIGPTLHRHKTGHSTRYENDQDDYQSDIELSPTSPTSNNLLAVRVDNLEQDAKENEHQA  
ILETIEQQQTVLRLSLSFVKPDHPERSAN

>MtMLO11 Medtr4g079140

MAEGEQRSLEETPTWAVSVCCFFVLVISLIIIEGGLHKLAEFLRKKRKS MGKALTKTKTEMMKLG FVSFLLTISEVPMSK  
ICINKDVANSFRPCKDSEYLAGEVSRKELGYHDNYCEAKGKVG LISSEGILELNILISILAVFHILYCTLTMLGKAKMR  
RWKKWEEETQ TLEYQIDNDSRRFYISQTLGGKRHFKFVNNYSPLLWIVCFMRQFYNSVSKDDYFALRNGFI AKNISSEGS  
NFNFNFKFLSRTYDEDFEKVVGIRFWIWLFSIFFIFLSAHEFYNYWLPFIPLVIALLAGTKLQVIITKMHLDSCKQSP  
VIKGTILVKPSDEYFWFHKPEWLLHLIQIILIQNSFQLAFFTWSWYEFGRSCFNREKEDIAIRIALGLAVQLLCAYVTL  
PLYTLVTQMGSNMRKEIFTEHITQGLKNWHKAKQSLKSNNSVSLHSRTSENSVRRSLSIESMQNNNKVENEDMQSVI  
VVTSPPPGNNSGSGEEEEIVNVASVEQIE SSESTSEIKNVEENNGKIITRGIYDGEISFGVYVGSSSRGIGEIVSIAEEE  
DDTSDQN

>MtMLO13 Medtr8g010500

MVEDKLLKDPICNMLLHGLLPLFAASSVAVSFAAEC SLHCLGNFLKKNQKPLYQALQKIKEELMLLGFISLFLTITQNG  
ITKICVPDEWYHMLPCSLEEIEEEMKKNSHFQTFSSDLVSGTARRLLGGGGGDDPFGFTDEKVGYCTAKGKVPLLS  
VEALHKLHIFIFVLAIVHVTSCVLTIIIFGGLNIRRWKWPENSIVADENHESQHAPWTDVTVTHVHQHSFIKNRFTGFGKN

YAIMGWKSFYKQFYGSVTKLDYVTLRRGFIMTHCRGNPKFNFKYMIRALEDDFQNVVGISWYLVIFVVFMLLNINGW  
HTYFWVAFIPVILLVAVGTLEHVIIQLAHEVAEKHSAIQGKLVVQPSDDHFWFHRPRIVLFLIHLILFQNSFEIAFFFW  
ILVTFGFNSCMMGKLYHTIPRLVIGLLIQVICSYSTLPLAIVTQMGTYYKKAIFDEQIQOTCLLQWQAQKAKKGLRGNNN  
QSGEGSTHSGASSNIQLGSVFRRAPAPEDNTIVPKDQSV

>MtMLO14 Medtr8g010540

MHGGEAEGRDLQFTPTWVVALVCTVIVAVSFAVERSLHYLGKVLKKNQKPLFEALQKIKEELMILGFISLFLTVTQ  
NGMIKICVPVEWTHMLPCSINGDDEVKTKLPSKSHFQTFSSKDVFGTAKRLLGDDHDSKDEEIGYCTAKGKVP  
SVEALHKLHIFIFVLAVVHVTVSCVLTIVFGGLNIRRWRWEDSIVADENNQSQTPERTDTVTHVHQHAFIKDHFTGFGK  
SAIMGWLSFFKQFYGSVTKLDYVTLRLGFIKTHCRGNPKFNFKYMNRALEDDFKKVVGISWYLVIFVVFLLNVNGW  
HTYFWIAFIPVILLVAVGTLEHVIIQLAHEVAEKHSAIQGELIVQPSDDHFWFHRPRIVLFLIHLILFQNSFEIAFFFW  
IWIQYGFNSCIMGQVKFIYPRLVMGVFIQVLCYSTLPLAIVTQMGTHTFKRSIFDDQVQTRLIGWAQKAKKGLRGDSN  
HSVQGSSTHNGGSTNIQLGSMFRRGPAPENNAFVPKNDES

>MtMLO15 Medtr2g079500

MAETVKEPRSLALPTWVSATVLTIFVAVSLLVERSINRLSNWLRKTNRKPLLEAVEKMKELMLLGFISLTLTATSGMI  
ANICIPSKFYNSAFAPCSRSEINKEIEENGSEGRKLLTASYPRILRRMLNGMDRNSCKEGYEPFVSYEGLEQLHRFIFVM  
AITHVSYSCLTMLLAIKIHWSRVWEDEAHMDRRNYLSEITRQMTMRRQSTFVKTHTSNSLFIWMTCFRQFGHSVVRAD  
YTLRKGFIITNHNLSKYDFHSHYVMSMEEFQRIVGVSGPLWGFVVGFMFLFNKIGSNLYFWIAIIPISLVLLVGTKLQ  
VIATLALENAGISGFFSEAKLRPRDELFWFKPELLESLIHFILFQNAFELASFFFWWWQFGYNSCFIRNHLLVYLRIL  
GFAGQFLCSYSTLPLAIVTQMGTNYKAALIPQRIRETIHGWGKAARKRRHGMFADDSTIHTDTSTVLSIEEDYQTI  
PHKDLVTGTEVELQPVPTVSTPSPIANETSSRAVTPLLRPSASVSSVFPFNSRQEEPISRSSMPSGR

>PsMLO1

MAEEGVKERTLEETPTWAVAVVCLVLLAVSILIEHIIHVIGKWLKRNKNALYEALKEKIKGELMLLGFISLTLTVFQDNI  
SKICVSKIGSTWHPCTSNTKAKAKSDESLEYKTNDRKLLLEYFDPIPRRILATKGYDKCFDKGQVALVSAYGIHQ  
LHIFIFVLALFHILQCIITLTLGRIKMRKWTWEDETRTVEYQFYNDPERFRFARDTTFGRRHLSMWAQSPILLWIVS  
FFRQFSGSISRVDYMLRHGFIMAHLPGHDAQDFQKYSRSIEEDFKVVVVISPTIWLFTVFLTLNTHGWYSYWL  
PFLPLI  
VILLVGAKLQMIITKMLRIQDRGEVIKAPVVEPGDHLFWFNPHLLFTIHLVLFQNAFQLAFFAWSTYEF  
SITSCFH  
KTTADSVIRITVGVVIQTLCSYVTLPLAIVTQMGTMKPTIFNERVATALKNWHHTAKKQVQKSNHSNNTT  
PYSSRPST  
PTHAMSPVHLLHRHTAGNSDSLQTSPEKSDYKNEQWDIEGEGPTSLRNDQTGQHEIQIAGVESFSSTELP  
VIRHESTSG  
SKDFSFEKRHLGSN

>PsMLO2

MSGGEGEGEDETLEFTPTWVVAVCTIIIVAISLAAERLLHYGGKYLKRDQKPLYEALQKIKEELMLLGFISLTLTVS  
QNGLTKICVPPGVLRHMLPCTLKEKDQKESELPKSHSAFSPGIARRLLADRLAEAEAAEAHPKTSFCSSSKVPLLS  
L  
EALHHLHIFIFVLAVVHVTVSVLTVVFGGARIRQWRWEDSIRKENYDTSKVLKPKFTQVQNEHF  
IKGRFSGFGKDSALI  
GWLQSFYKQFYGSVTKSDYVTLRLGFIKTHCKTNPKDFDHKYMIRALEDDFKIVVVISWYLVLFVVFLLN  
NINGWHTYF  
WIAFIPVILLVAVGTLEHVITQLAHEVAEKHAAIEGDLVVKPSDGHFWFHRPHIVLFLIHFILFQNAFE  
IAFFFWI  
VVTYGFDCIMGQVRYIVPRLVIGVFIQVLCYSTLPLAIVTQMGTNYKRAIFNEHVQVGLVWGAEKVKKK  
KALKAESQGS  
HDQEGSSTSAGIQLGSVFQKASTPEDNASVPKAEGSN

>PsMLO3

MATQTEQRSLEDTPWAVSICFFVLVISLIEHGLHKFTEVLKQKRKSMGKALAKTKIEMMKFGVVSFLTLTISEV  
PISKICINKDMANSFLPCKDSMEKLAVSSELDQTPSTNELGNQVNYCEAKGMVSLISDDGVLQNLVLSILAVF  
HILYCTLT  
MCLGMAKMRRWKWEETQTLLEYQIDNDSRRFQYISQTLGGKRHFKFVNNYSPLLWIVCFMRQFYNSVSKD  
DYFALRNGFI  
AANISEGNSNFNFKFLSRTYDEDFEKIVGIRFWIWLFSIFFIFLSAHEFYNYWLPFIPLVIALLAGTKLQ  
VIITKMH  
LDSCKESSVIKGTILVKPSDEYFWFHRPEWLLHLLQIILIQNSFQLAFFHWTWYEFGRPRSCFNREIEDIA  
IRIVLGLAVQ  
LLCAYVTLPLAIVTQMGSNMRKEIFTEHVNQGLKNWHKAKLSLSKNSNSASLHKTSENSVRGSLEELRNN  
EDIITPN  
SANNSGSGEEKEVIVAAVEKXIPSESTSEENGKIITRGIYDGEISFGIYVGSSSRGIGEIVAAIEEEDDY  
THHKFESRGI  
GLVDCNIYLNKTHSLN  
NVYNL

>PsMLO4

MAENGKETRSLALPTWVSATVLTIFVAVSLLVERSINRLSNWLRKTNRKPLLEAVEKMKELMLLGFISLTLTATSGMI  
ANICIPSKFYNSAFAPCTRSDIDKEIEENGSEGRKLLTASSPRLIRRMNGINRSCCKEGYEPFVSYEGLEQLHRFIFV  
MAITHVSYSCLTMLLAIKIHWSRVWEDEAHMDRRNYLADITRQLTMRRQSTFVKPHTSNPLAIWMTCFYRQFG  
RSVVRADYTLRKGFI  
IMNHNLSKYDFHSHYVMSMEEFQRIVGVSGPLWGFVVGFMFLFNKIGSNLYFWIAIIPISLVLLVGTKLQ  
QVIATLALENAGIAGFFSEAKLRPRDELFWFKPELLESLIHFILFQNAFELASFFFWWWQFGYNSCFIRNHLL  
VYLRIL  
LIGFAGQFLCSYSTLPLAIVTQMGTNYKAALIPQRIRETIHGWGKAARKRRHGMFPDDSTFHTDTSTVLSIE  
EDDHRII  
DDSLQDIATGVEVELQPVTAVTATPSPIANETSSRGITPLLRPSASVSSVFPFARQEPVSRSSMPNGR

>PvMLO1 Phvul.001G175900

MNMTAPGYSLQHTPTWAIATVFSFILISISIIIEHLIHLIIKWLKRKRSKDLVEAIERLQSELMILGFMSLLLTITQDAI  
IEICIPVRAADTMLPCRKRRTTNDTALDSCSAKNASEVALVSKHGHIQLHMFIFVLAVMQIVYSFLTIVSLARAKMKNWK  
AWDEETQTMEEYIANDPNRFYARQTTFGRRHISTSTASPVFVWIKCFFRQFFHSVEKVDYLTLRHGFISAHFSARNSNF  
DFQAYIEQSLEEDFRIIVSISPMWFTVIVIFLLVDVHGWHVYLWLSYVPLFLVLVVGAKLEIVDEMALQMKDVNSVTKG  
TPLVCPDDYFWFGHPGFVLTLLHYTLFVNAFELAFFVWVSTQFGINSYCYHEHRTFTIIRVVI AVAVQVLC SYVTLP  
LVAQMGSEVKSALAKILRQWHVEVRERRRQQLKLVKSF SFRMNMSSSEWSQGNKSAPEFSSELRENTRSSNEGEIVEEL  
EHRVKTEATSSNDPPSVV

>PvMLO2 Phvul.002G107600

MGKENGEGRSLAETPTYAVATVIAVLVLSLFLFQGTLLKLVKWLDRTRKRSLLSALEKIKEELMLFGLLSLLMGHWIIFV  
AKICVKSSVLSSRFPCALEKNSVKDVVWLSSEYSNRVTVKGQVNNGLRNYCPEGRESLASYESLEQLHRFVFLGITHV  
TYSFLAVALALIKIYSWRTWENEAKTIAVQSIQDTSQSTSSIRLRLNTFIFHHTSHPWSSHKILVWLLCFSRQFWSSIH  
RADYMALRLGFI TNHDLPTTYDFHNYMLRSMDEEFRDIVGVSLLWVYAICCIFLNFGHSNFYFWLSFVPAVLILIGTK  
LHRVVVKLAVEIINRCPDMKPNQFNLRDELFWFGKPRFLRLIQLISFLNAFEMATFLWSLWEIKDPSCFMNNTFIVIR  
LSFGVISQVWCSEFITFPLYVIITQMGSRFKKTVSVENVRKSLSKWQRRVKGRQSYSSALLTATSPTSISSEFIYGNDRASI  
SEEGSSSGTKDICLSYLDHESRTQANASFPSEYENDHNDQSDSHDI IHSSPPPLS

>PvMLO3 Phvul.002G117900

MNSSKFRKLLSCVWVLPWVLLWSGGSAMAASESGSSSKELDQPTWAVAVVCTVFILISITLSEKSLHKVGTWLGKKQKK  
ALLEALEKVKAEMLILGFISLLLTFGQSYIVKICIKEPMADKMLPCPYKYKDAEKASNDDGKHKRKLSSYERRYLAADS  
ISFKCSNEGYPELLSVNGLHQLHILIFFLAVLHVLYSAITMLLGRLKIRGWKAWAEETSTHNYEFATAASRFRLTHTSTF  
VRAHADLWTRIPIFFYIGCFRQFYRSVKNKTDYLTLRNGFITVHLAPGSKFNFKYIKRSFEDDFKVVVGVSPILWASVV  
VYLLINVNGWRTTLWVSVIPVVIILAVGTKLQAILAKMAIEITERHAVVQGMPLVQGS DKYFWFGQPQLVHLIHFALFQ  
NAFQVTYILWIWYSFGVRNCFRNDYKLATIKVALGIVMLCLCSYITLPLYALLTQMGSRMKTAFDEQTNKALKKWHMAV  
KKKQRVVVLGKSNAESVYGSPTASTSTVHPSGPTLHRYKTTGHSTRSSSTYEDQDHEYESDVELSPELSQTTSFIVRMNHA  
DHQQLEHEHRTEGENNSSEESDFS FVKVPSDPVEITTTPHGI

>PvMLO4 Phvul.003G271300

MSVSKCKRSLCLVSWLWFCCVSVASSESSIGSKDLDTPTWAVACVCTVFILISLTLSEKSLHKVGTWLGKHKALLEA  
LEKVKAEMLILGFISLLLTFGQSYIVRICIPTDVADKLLPCPLVGTDRSSEEEHRRKLSSYERRYLSDDATPYQCKKG  
DHQPLISVNGLHQLHILIFFLAVLHVLYSAITMLLGRLKIRGWKAWEEETSSHGYEFANDPSRFRLTHTSTFVRAHASFW  
TRYSIFFYIGCFRQFYRSVKGADYLALRNGFITVHLAPGSKFNFKYIKRSLEDDFKVVVGVSPVLWASVVFLLLNVN  
GWHAMFASLIPVVIILAVGTKLQVTLAKMAIEITERHAVVQGIPLVQGS DRYFWFGRPQLVHLIHFALFQNAFQITYF  
LWIWYSFGLRNCFHADYKLAIVKVALGLAALCLCSYITLPLYALVTQMGSRMKSIFDEQTSKAIKKWRMAVKNKQGVKL  
GNSKVRAMDGSTTDSVHSSGPTLHRFKTTGHSTRTMSAYDDDQDYHSDIELSPISPTANLIVRVDHDEHQAEKAQHHT  
PNNQDLSRLSTLETSMK

>PvMLO5 Phvul.004G071700

MANEVYERTLEETPTWAVAVVCFLLAVSIAIEHLIHGIGKWFKKKQKNALFEALEKVKGELMVLGFI SLLLSVLQDQIS  
KICVSEEVAASWHPCANPKSSTATKTDEDESDDIQINSRKLQLYDSIPRRILATKGYDKCAEKGVAFVSAYGIHQH  
FIFVLAIFHILQCIITLGLGRTKMRKWRWENETKTIEYQFYNDPERFRFARDTTFGRRHLNPNWSQSTISLWIVSFFRQF  
FGSATKVDYLTLRHGFITAHLAGSDARFDQKYIQRSLKDFKVVVGISPVIWFFAVLFLLTNTHGWYSSYWLPIPFV  
VILLVGAKLQMIITKMGLRITDRGEVVKGAPLVEPGDDLFWFNRPRLLLFLIHLVLFQNAFQLAFFSWSTYEFSLDSCFH  
ETTADVAIRLTMGVVIQVLC SYVTLPYALVTQMGSTMKPTIFNQRVASALKNWHSTAKKQVKNKQNTPFSSKPTPTY  
GMSPMHLLQKHLAGRSQAQTSPTS NYENEQWDVEGSPSTSNHAAAEETQMVMPEPGSSSAPEFPTSSQIEIRVSSSEF  
SFEKRHTGASEEI

>PvMLO6 Phvul.004G071800

MGEAKIHKRSLEETPTWAFVAVCFMLLAISIIIELVIIHAIGKWLKXKXKSGLYESLEKVKGELMMLGFLSMLLTVFDPL  
SKICISQNAASTWHPNSPKAVSNATSHITDRKLLHLDPIPRVLAAGYDKCADKGVAFVSAYGIHQHIFIFVLA  
IFHIQCIVTLALGRTKMRRWKKWEDETKTIEYQFYNDKRFRLAKDTTFGQRHLNTWSQSSISLWIVSFFRQFFGSVKK  
VDYFVLRHGFIMAHVSPRSDSGFDFQRYIKRSLDEDFKVVVGISPII WFFAVLFLLTNTHGWYSNYWLPIPLITILIVG  
ADLQMIITKMGLRIQDRGVVMGAPVVEPGDDLFWFNRPRLLLFI IHLVLFQNAFQLAHFAWSTYEFSESCFHKTNAENV  
VRLTMGVVTQVLC SYVTLPYALVTQMGSTLKPTIFNDRVAAALKKWHHTSKKHLKHSQHSEAKKSI PFSSTSSSIFGM  
SPIHLLHRHPVGRSDSAQTSPTS LYENQQCDVQGESSVSNHPGTNETQMQLVGLSPQTT

>PvMLO7 Phvul.005G082500

MEKNVQETRSLALPTWVAVVTFVAVSLLVERSIIHRLSNWLRKTNRKPLLALEKMKELMLLGFISLLLTATSRMI  
ANICIPSKFYNSAFAPCTHSQIDEQMEENGSEERKLLTASAYHVFGRLDGINRSTCKEGYEPFVSYEGLEQLHRFIFVM  
AVTHISYSLTMLLAIKIH SWRVWEDEAHMDRRNSLSEISRELTMRRQSTFVKSHASNPLFKNSTLIWVTCFFRQFAHS  
VVRADYLTLRKGFIMNHLSLKYDFHSYMVRSMEEFQRIVGVSGPLWGFVVGFMFNKGSNLYFWIAIIPVSLVLLVG  
TKLQHVIIATLALENAGIARFFPEAKLRPRDELFWFNKPELLLSLHIFILFQNAFELASFFWFWWQFGYDSCFIRNHLLLY  
LRLILGFAGQFLCSYSTLPYALVTQMGSTNYKAALIPQRIRET IHGWGKAARKRRHGMFPDDSTIHTDTSTVLSIEEDD  
QVIDAPEVELPPVAVTPTPSPIANETSSRAVTPLLRPSASISSVHSSSKAEVI IRCSSMPNGS

>PvMLO8 Phvu1.005G136700

MGGRSLEETPTWAVAVVCFVLLTISIVIDHIFHLIGKWLKXKXKRALYESLEKIKSELMLLGFISLLLTVGQSVISRICI  
SEKVAGTFHPCTHKTDHTRRLLPELFRSDHNQNLRRILAAAGGTDKCAAQGVVVSSEGIHQHLHIFIVFLAVFHVLYCIL  
TLALGRAKMRWRKRWEETKTAQYQFSDPERFRFARETSFGRRHLSFWTQHTILVWIIICFFRQFVRSVPKVDYLTLRHG  
FMAHLGPQSRHKFDFRQYIKRSLEEDFKVVVEISPPWFITVFLFLLFHTHGWSYLWLPFAPLIIVLLVGTKLQVIITK  
MGQRIQERGEVVKGMPLVQPGDDLFWFNKPRLLILYLNVFVLFQNAFQLAYFSWTAVQFGMKSCFHSQTEDVVIKISMGVF  
VQFLCSYVTLPLYALVTQMGSTMKPTIFNERVAMALRNWHHAACKHVKKQNRRLQSRPTTPNHSTSQAHLRRCHSEIDI  
YPTDSEAHHPYEMDLSPPSSKVVDHEVEMEMGHLDHGPLEDVNELNSALAGSGVTQHEINIEHGKEFSFDNR

>PvMLO9 Phvu1.005G136800

MGGNGGRNLDPTWAVAVVCFVLLSVSIIIEYIFNLIIGKWLKQKXKRALYESLEKIKSELMLLGFISLLLTVGQGLISR  
ICISEKVAGTFHPCAHRRVKQNTTPELHDEYRNNRHLLALEDKCAPQGVVVSSEAIHQHLHIFIVFLAVFHVLYCILT  
HALGRAKMRWRKRWEVETKTPEYQVSHDPQRFRFARETSFGRRHLSFWTQNAVLVWIIICFFRQFVHSVPKVDYLTLRHGF  
MMAHLGPHSHQKFDGKYIKRSLEEDFKVVVEISPPWFITVFLFLLFNTHGWWSYLWLPFAPLIIVLLVGTKLQVIITKM  
GQRIQERGEVVKGMPLVQPGDHLFWFNKPRLLILYLINFLVLFQNAFQLAFFSWAALQFMMKSCFQSQKQDVVIRISMGIFV  
QFLCSYVTLPLYALVTQMGSTMKATIFNEKVAMALRNWHHTAKKNVKEKRGVRSQSPLSTRPSTPQQQPKSQANLLRRYH  
SEMATYPSSPIRDFEAHLPGYIHSPPSSMVNAATSSIHRHEMEMETEIEMDQVSALTQRQIDIDIDIQDNQEFSSFAKR

>PvMLO10 Phvu1.006G133800

MAEELNDSLEYTPTWIVAVVCSIIIVFISLCVERALHKLKGYLRSKNQNELYEVLTKLEELMLLGFISLLLTVFQGLISD  
ICISPNLATQMLPCKRPHRSSQGEHYQIYYDSIINRRRLFSTGSGSDHCTHKGKVPLLSLESQHLHIFIVFLAVVHAI  
FCVTTMLLGGAKIREWKAWEYDYGHDREELPNSNAVIDTHEFFKTRDRGHWRKAAVISWLIISFFKQFHGSVTKYDYIALR  
HGFVKKHYDPNPTYNFNHMYMLGTLLEEDFKRVVGIISWYLVVFLVFLLLNIGGWHTYFWLAFPLIILLLLVGAKLEHIIAR  
LYQDSIGVLGREDDNSMKPSDEYFWFTSPPLVLHLLHFILFQNSFIEAFFFWIWCYGFDCIMEKVTVYVIPRLIMGVIV  
QVLCSTLPLYTIVTQMGSKIKSQKSPSDPLKTPHSNYMIKESTQIDEQAIIMVEDATSSIELPHIVHLPFEKPNTSN  
N

>PvMLO11 Phvu1.006G216900

MAEVLQRGRSLAETPTYSVASVAVMVFVCLLVERSIRYRFGEWLKKTRRKALFASLEKLKEELMLLGLISLLLAQSARWI  
SEICVTSSLSRFRYICSEQDVDINENIMLESSSSSIPDETSITGAFNQCGEGHEPVSSEGLEQLHRFLFVLGITHVLY  
SCLAVGLAMSKIYSWRWENQARMPDGNQAKKIKLMKRQTTFFHRTSHPWSRSPILNWMCLFLRQFRSSIRKSDYLA  
LRLGFI TEHNLP LSYNFHQYMVRSMEDEFHGILGISWLLWIIYAIVCIFVNIHGLNIYFWLSFIPAILVMLIGAKLQHVVS  
TLALEIMEQTGPFPRQVPRDDLFWFKPDILLWLIQFVIFQNAFEMATFIWTLWGFQEQSCFMRNHYMIIRLASGAI  
VQFWCSYMTVPLSIIIVSQMGSKCKALVTESVRESLHWSCKRVKHKSKHDSLHSHTARSVCSLESTIDERDEMTVASGTL  
TRSSSLGSLNQITVSSVEQLKLETPNKAKHSR

>PvMLO12 Phvu1.007G093600

MGKEEVLQRKLEATPTWVVAVCFVMLAISIIIEHVIEELGKWLKXKXKALHEALEKIKGELMLLGFISLLVVFEDRI  
VSIKIPESVASTWNPDCPSYVSKGAEGYVEKCAKKEGTVAFMSKYGLHQLHIFVFLAIFHILQCIMTLTLGRTKISIW  
RKWEDETKGLEHWFSDPERFRFARDTTFGRRHLSWSKSPTLLWIVSFCRQFYGLNKADYMALRHGFVVAHLTPASEP  
KFDFQNYITRDLDEFAVVVGISPTIWFVAVVILLTNTHGWWSYFWVPIPLIIILLVGTKLQMIITDMALKIQDRGEVV  
KGEVQVQPGDELFWFNPRLLVFLIHLVFLVFLNAFQLAFFTWSTLDNGFKINSCFHRTTADIVIRLTMGVLTQVLCSTL  
PLYALVIQMGSSMKPTIFKDNVASALKSWHHSKXKHLKHNDRDSTNTPFSSRPGTPTRGMSPVHLLHKHPRHSDSPLVSP  
RASDYENGQWDAEVSHSPSHHARDIDHEETMQVQPPAAAEPLPAGLNPVRTQHEINIALSEFSFGRRNPGRADY

>PvMLO13 Phvu1.009G006800

MAGGASGGERTLQETPTWAVASVCAVFLVSVLIEHGIHLLKWFQKRNKKAMREALEKIKAEMLLGFISLLITFGTKY  
IAKICIPTSAGDIMLPCKKVEESKNSDDSNRKLLEYFEDNMEWRRVLATASSGGDFCSQKGVSLISQSGVHQLHIFIV  
LAVFHILYSVMTMVLARAKMKKKAWEAETSLEYQFTNDPSRFRFAHQTSFVRRHSGLSRMPGIRWIVAFFRQFFASVT  
KVDYMTMRHGFINAHFAPNSKFDQYIKRSMEDDFKVVVGISIPLVVFAIVFMLVNVYKWTTLTWLSLAPLVILLVGT  
KLELIIMEMAQEIQRDTTVVRGVPIVEPNNKYFWFNRPQWIFLIHFTLAFNAFQIAFFLWTWYEFKITSCFHENLPLIL  
TRVFLGIALQVVCYIITFPLYSLVTQMGSHMKQAI FEEQTAKALKKWKQVAKDKRKLKAGVDVPSGTMSGEATPSQGTS  
PIHLLHKYKPSQTDTDVLYSPRSYQSDTDFSDTEGSSHQLNQITQTHQAPRNGEAHSIEFSFVSHNNVQF

>PvMLO14 Phvu1.009G007000

MSGGGGDSRQLDLPTWAVAAVCAIIVLISILLEKIIHKFARMFEKKKHALLEALEKIKAEMLVLFISLLLTFGQNY  
ISKVCIPQKYAHTMLPCLPIDQRDGGGPATEHGAGAATEHGAGAATEHGAGAATEHEVEPEGEGGESAEAGGGHRRRILSY  
DRRFLSGGGGSPCKPGKPLISVNGLHQLHIFIFFLAVFHVIIYSAITMTLGRAKIRGWKAWEEDHVVDLNDPRRFR  
LTHETSFVRDHSFWTKTPVSFYFVCFRQFFRSVRRADYLTMRHGFVTVHLAPGSKFDQYIKRSLEDDFKVVVGISIP  
ILWGSVVLVFLVNVHGWHAAFVVSFLPLVILAVGTKLQAIITRMALDIKERHAVVQGIPLVQVSDKYFWFAWPQLVLYL  
IHVYVLFQNAFELTYFWWTWYEFGWASCFYEDDRLMIIRVALGLGAQVVCYVTLPLYALVTQMGSTMKKSIFDDQTSRAL  
KQWHKNALKKKKASKGRHETRTLGGSPGEHTPEHSPHPPPRDTEMAAQTATIVTSVDNETYDKRDLLTGP

>PvMLO15 Phvul.009G117900

MSGGGGEEGDSLEFTPTWVVAVCTVIVAIISLAAERFLHYGGKFLKAKDQKPLYEALQKIKEELMLLGFISLLLTVTQNG  
ITKICVPPGFTRHMLPCSLDLAPNHESHQTFYFPGTPRLLAATAEEHAPPHSKAETETATGFCSRKNKVPLLSVEALH  
HLHIFIFVLAIVHVTFSALTVIFGGARIRQWKHWEDSIKQNYATDQVLKPKVTVNVQHQDFIRDRFSGFGKDSAIVGWLI  
SFSKQFYGSVTKSDYVTLRHGFIMTHCRTNPKFNFKYIMIRALEDDFKKVVGISWYLLWLVVIFLLLNINGWHTYFWIAF  
IPVILLLSVGTKLEHVITQLAHDVAEKHAAIEGDLVVQPSDEHFWFHRPRVFLFIHFILFQNAFEIAFFFFWIWVTYGFD  
SCIMGQVRYIIPRLVIGVFIQVLCYSYTLPLYALVTQMGTHYKRAIFNDHLQONIVGWAQKAKRRKEQNADGNPQGSSQ  
ENGNTGIQLGSIFPKKASGPGNSSSAPKADRTS

>PvMLO16 Phvul.010G034400

MGGGGGEEGNLEFTPTWVAVVCSVIVSASFAAERFLHYGGTFLKKNQKPLFEALLKIKEELMLLGFISLLLTVTQNG  
I IKICVPESWTRHMLPCSLDKKEELES AKLTSHFQTFSSFTDIPATVRHLLAENENEDHQSGEKLGHCAKGRVPLLSVE  
ALHHLHIFIFVLAIVHVTFCVLTVVFGGLKIRQWKHWENSIVDENNRKQPVLESIVTHVHEHAFIQNHFTGFGKDYAVLG  
WLKSFQFYGSVTKLDYVTLRLGFIMTHCRGNPKFNFKYIMIRALEDDFKQVVGISWYLLWIFVVI FMLLNHVHGWHYFW  
ISFIPILLLLAVGKLEHVIIQLAHEVAEKHSAIEGELVVQPRDDHFWFHRPHIVLFLFIHFILFQNAFEIAFFFFWILFTY  
GFDSCIMGRVRYIVPRLVIGVFIQVLCYSYTLPLYAIVTQMGTHFKKAI FDDQVQARLVGWAQKAKKKGLRGDNNQGSVQ  
GSPHVGAGIQLGPFVFRKPSPPEDTVLP

>PvMLO17 Phvul.011G073800

MAGGGGRNLEETPTWAVSTVCFVLIFISIIIEHIIHLIGQWLKRRKRALYESLEKIKSELMLLGFISLLLTVGQGLVSR  
ICISEKIASTWHPCSADDTSEESGQGTNSRLLA AFHGSNDVNPRVLAGGSDKCGEGKVPFVSSEGIHQHIFIFVL  
TVFHVLYCILTALGRAKMKRWKRWEETKTPEYQFSDPFRFRFARETSFGRRHLSFWTKNPVLMWIVCFRQFVRSVP  
KVDYTLRLHGFIMAH LAPQSHSKFDFRKYIKRSLDEDFKVVVGISPPFWLFAVLFLLLNTHGSYSYLWLPFIPLI ILLV  
GTKLQV IITEMGLRIQQRGEILKGVPLVQPGDYLFWFNKPGLILYLIN FVLFQNAFQLAFFSWSVLQFGIKSCFHAHTED  
VVIRITMGVLIQILCSYVTLPLYALVTQMGSTMKPTIFNERVAEALRNWHQTAKKQIRQNRVGPLSLSVTPMSSRPTPS  
HNMSPVHLLRYRSEIDSFP TSPRRSNVDGDHTQPWDVESPSPSYSHHEMEMGHTNDPTTNTTTHEIVPAANTREFSFDK  
RPTTAP

>PvMLO18 Phvul.011G122800

MDMEEQRSLEETSTWAVSVFCFFLLTSLII EGS LKLAELRKRKDKSLGRALTKTKTEMMKFGFMSFLLTISEVPI SK  
ICISKGVATYFLPCKDAVDLTGLSATRTSTSELDAHATNQSNVEFNCEAKGMVSLISSEGILQLNIFISFLAVFHIF  
CTLTMC LGKAKMRRWKRWEETRTLEYQIANDPRRFQYTGQTMIGKRHLNFWSYHSPLLMVCFIRQFYGSVSKDDYYTL  
RNGFIAANISLGSNFKKFLSRTYDEDFEKVMGIRIWIWIFSI LFIFFSAHEFYNYWLPFIPLMVALLAGTKLQV IIT  
KMCVDSCKANPVIKGSLVTPSDAHFWFHRPEWLLYLLKFI LQNSFQLAFFTWTWYEFGPRSCFNRENEDIGIRIAMGI  
AVQLLCGYVTLPLYALVTQMGSSMRREIFTERISRGLKNWHKAKQTLHKNNSTSSKHSDSLHSGGDNSARGTMQSVHT  
PDNVAVTNNPSPSNEGKRIASTNNEQDTSSPSTSEITATEENPKIITRGTYDGEISFGSSWKNVGSRRGIREIGSITEE  
DDAEKLPELIP

>PvMLO19 Phvul.011G172300

MEKNVQETRSLALPTWVAVVTLTVFVAVSLLVERSIIHRLSNWLRKTNRKP LLAAIEKMKEELMLLGFISLLLTVTQNG  
ANICIPSKFYNSAFAPCTRSQIDEQMEENGSEERKLLMASAYHVFGRLDGINRSTCKEGYEPFVSYEGLEQLHRFIFVM  
AVTHISYSCLTMLLAIKIH SWRVWEDEAHMDRRNSLSEITRELTMRQSTFVKSHASNPLFKNSSLIWVTCFFRQFAHS  
VVRVDYTLRLHGFIMNHLHSLKYDFHSYMVRSMEEFQRIVGVSGPLWGFVVGFM LFNKGSNLYFWIAIIPVSLVLLVG  
TKLQHV IATLALENAGIAGFFPEAKLRPRDELFWFNKPELLLSL IHFILFQNAFELASFFWFWWQFGYDSCFIRNHL LLY  
LRLILGFAGQFLCSYTLPLYALVTQMGSTNYKAALIPQRIRET IHGWGKAARKRRHGMFPDDSVTIHTDTSTVLSIEED  
DQLIDAPEVELQPVTAVTSTPSPIANETSSRVVTPLLRPSASISSVHSSSKAEVI IRCSSMPSGS

>VrMLO1 JJMO01000124

MASKVYERTLEETPTWAVAVVCFVLLAVSIAIEHLIHGIGKWFKKRKNALFEALEKVKGELMVLGFISLLLTVLQDQIS  
KICVSKHVASTWHPENPKSSTTTSEDESEDIQINRKLQLYDSIPRRVLATKGYDKCAEKGVAFVVSAYGIHQHIFIF  
FVLAIFHLLQCIITLGLGR TKMRKWRWENETKTI EYQFYNDPERFRFARDTTFGRRHLS PWSQSTISLSIVSFFRQFFG  
SVNKVDYTLRLHGFITAH LAPGSDARFDFQKYIERSLEEDFKTVVGISPV IFFFVAVLFLLLNTHGWYSYWLFPFIPIII  
LIVGAKLQMIITKMLGRITDRGEVVKGAPLVEPGDDLFWFNRPRLLLFLIHLVLFQNAFQLAFFSWSTYEFSLHSCFHET  
TADIVIRLTMGVIIQVLCYSYVTLPLYALVTQMGSTMKPTIFNQRVASALKNWHNTAKKQVKS SKPTTPLSSRPSTPTYGM  
SPMHLQKHLAGRSDSAQTS PRTSNYENEQWDIEGSPSKSNHAAGEETQMVMESGSSSAPELPTSSQLEIRVSSEFSF  
EKRHLGAETREDDSFY

>VrMLO2 JJMO01000125

MAGGGGRNLEETPTWAVSTVCFVLILISIIIEHIIHLIGKWLKRRKRALYESLEKIKSELMLLGFISLLLTVGQGLIS  
RICISEKVASTWHPCHENTDTTEESEQGTNSRLLA AFHGSNEVT SRRVLAGGSDKCGEGKVPFVS SDGIHQHIFIF  
VLTVFHVSYCITTMALGRAKMKRWKRWEETKTPEYQFSDPFRFRFARETSFGRRHLSFWTKNPVLMWIVCFRQFVRS  
VPKVDYTLRLHGFIMAH LAPQSHSKFDFRKYIKRSLDEDFKVVVGISPPFWFVAVLFLLLNTHGSYSYLWLPFIPLI ILL  
LVGTKLQV IITEMGLRIQQRGEILKGVPLVQPGDYLFWFNRPALILYLIN FVLFQNAFQLAFFSWSVLQFGIKSCFHAHT  
EDVVIRISMVGLIQILCSYVTLPLYALVTQMGSTMKPTIFNERVAEALRKHWHQTAKKQIRQNRVGSLSL SGT PMSSRPTT



PSHHMSPMHLRLYYRSEIDSPASPRRSNFDGDHTQPWEIDSPSPSYSQHEVEMGPTNDPNTNTSQHEIVTIAHTKEFSF  
DNRPTTAT

>VrMLO3 JJMO01000125

MLTHHNSYFVFSFLKIFGRKCRKLRNQRLVLMIEGEERSLEETATWAVSVFCFFLLLIISLIEGSLHKLSEILRKRKGS  
LGRALTKTKTEMMKFGFMSFLLTIMSEVPIISKICINKDVATYFLPCKDAAELTGFSATHTSTSQFDVAPATNESEVEVNY  
CEAKGMVSLISSDGIQLNIFISFLAVFHILFCTLTMCGLGKAKMRRWKRWEETRTLEYQIANDPRRFQYTGQTMIGKRH  
LNFWSYHSPLLWVCFVRQFYVSVSKDDYYTLRNGFIAANISLGSNFNFKKFLSRTYDEDFEKVMGIRIWIWIFSIILFIF  
FSAHEFYNYWLPFIFPLMVALLAGTKLQVIITKMCVDSCKANPVIKGSLLVTPSDAHFWFHRPEWLLHLLKFIILQNSFQ  
LAFFTWTWYEFGRSCFNRENEDIGIRIGMGIQVLLCGYVTLPLFALVTQMGSSMRREIFTESVSMGLKNWHKRAKQSL  
QNNSTSRKHSDSLHSGGDNARGTMHSLNPNPDIVLVTNNPSPSNEGESIAPTNNQDVSSPSTSEITATEEENSKIITR  
GTYDGEISFGSSWKNVGSRRGIGEIVSITEEDDVEKLPEFIHR

>VrMLO4 JJMO01000126

MATPSYSLQHTPTWAIALVSFILISISIIIEHFHILIKWLRKHKRSDLVEAIERLKSELMLLGFMSLLLTVTQDAIIEI  
CIPVRAADTMLPCRKRANDTALDSCSAKSASEVALVSKHGIHQLHMFIFVLAVMQIVYSILTVSLARAKIRHWKAWDE  
ETQTIIEYIANDPNRFYARQTTFRRHISTTTASPVSVWIKCFFRQFFHSVEKVDYLTLRHGFISAHFSARNSNDFQK  
YIEQSLEEDFRIIVSISPMWFTVVIIFLLVDVHGWHVYLSYIPLLLVLVVGVAKLEVIIVDEMALQMKDVNSVTKGTPLV  
SPSDEFFWFHGHGFVLTLLHYTLFVNAFELAFFIIVVSTQFGINSYHEHRTFTVIRVVIIVAVQVLCYVTLPLIALVAQ  
MGSQVKSKALAKILRQWHVEVRERRRQKQLVKSFSFSHMSSEWNQGNKSALEFSSGLRENARSSSEGEIVEALEHPMIT  
QANSSDPPPSV

>VrMLO5 JJMO01000120

MAGSGGRNLDPTWAVATVCFVLLSVSIIIEYIFNLIIGKWLKQKHKRALYESLEKIKSELMLLGFISLLLITIGQLISR  
ICISENVAGTFHPCTYRREKYPPLLEDDYHHRHILAAEAGYDKCAAQKVPFVSSGAIHQLHIFIFVLAVFHILYC  
ILTLALGRAKMRWKRWEVETKTAEYQYSHDPQFRFRFARETSFGRRHLSFWTQHVVLVWIVCFRQFVRSVPKVDYLT  
HGFMMHLGPHSHQKDFRKYIKRSLEEDFKVVVEISPPIWFITVFFLLFNTHGWYSYLWLPFAPLIIVLLVGMKLVII  
TKMGQRIQERGEVVRGMPLVQPGDHLFWFNKPRILILYLVNFVLFQNAFQLAFFSWAALQFMMKSCFLSQKKEVIRISMG  
IFVQFLCSYVTLPLIALVLTQMGSTMKATIFNERVAMALRNWHHTAKKNVKEKRLRSQSPLSTRPSTPKHPKSKANLLRR  
YHSEMATYPPSPIRFDFEAHLPGIHSPPSSKVNAAATSSIDQNEMEMEVEVIDMDQVSDLTQHHIDIQDKQGFSDKR

>VrMLO6 JJMO01000120

MEGRSLENTPTWAVAVVCFVLLSVSIIIEYIFNLIIGKWLKKNKHKRALHESLEKIKSELMLLGFISLLLITVQSVISRICI  
SEKVAGTFHPCTHQS DHKTDARILLSELFGSDHGQNRRI LAAGGTDKCAAQKVPFVSSGAIHQLHIFIFVLAVFHVLY  
CILTLALGRAKMRWKRWEETKTTQYQFSDHPPERFRFARETSFGRRHLSFWTQNTVLVWIIICFFRQFVRSVPKVDYLT  
RHGFMMHLGPGSRHKFDFRQYIKRLEEDFKVVVEISPPIWFITVFLFLLFHTHGWYSYLWLPFAPLIIVLLVGTGLQVI  
ITKMGQRIQERGEVVKGVPLVQPGDHLFWFNKPRILILYLVNFVLFQNSFQLAYFSWTALQFGMKSCFHSQTEDVVIKISM  
GVFVQFLCSYVTLPLIALVLTQMGSTMKPTIFNERVAMALRNWHHGAKKHVKQONRRSQSAPLSGPTTPDHSMSQAHLR  
RWHSEMDTYPTDSEHRPCEIDLGPSSKVHHEMEMDQLDHGPPQNVNDQTQHEINIEHGKEFSFDNR

>VrMLO7 JJMO01000121

MAGGASGGERTLQETPTWAVAAVCAVFIIVSVLIEQGIHLLKWKFKRHKAMSEALEKIKAEMLLGFISLLLITFGTQY  
IAKICIPASAGDMLPCKKVEASKDPDSSNGGRKLLYFEDNMEWRRVLATASSGGDYCSQKGVPLISQSGVHQLHIFIF  
VLAVFHIFYSVMTMVLARAKMKKAWAEATSSLEYQFTNDPSRFRFAHQTSFVRRHSGWSRMPGIRWIVAFFRQFFASV  
TKVDYMTMRHGFINAHFAPNSKFDQKYIKRSMEDDFKVVVGISIPLWAFIIVFMLVNVYKWTTLTWLSLAPLVILLV  
TKLELIIMEMAQEIQRDTTIVRGVPIVEPNKYFWFNRQWITFLIHFTLFFENAFQIAFFLWTWYEFKITSCFHENLPLI  
LTRVFLGIVLQVCSYITFPLYSLVTQMGSHMKKAIFFEEQTAKALKKQVRVAKDKRKLKAGVDVPSGTMSGEATPSQGS  
SPIHLLHKYKPNQTDTDVLYSPRSYQSDTDLSDTEGSSYQLNEIIQTQTPQAPRNGEPHITEFSFVSFKSEQF

>VrMLO8 JJMO01000121

MSGGGGDNRLDPTWAVAAVCAIIVIIISILLEKIIHKFAAVFEEKKKHALLEALEKIKAEMLVGLFISLLLITFGQNY  
ISKVCIPQRYAHTMLPCLPLEQRGGGAAAEHGAGGGEAEGGSHRRFLSYERRVLSGGGGPCKPGFLPLISVSGLHQL  
HIFIFFLAVFHVIYSAITMTLGRAKIRGWKAWEDHVVDEDALNDPRRFRRLTHETSFVRDHSSFWTKTPVSYFYVCFRQ  
FFRSVRRADYLTMRHGFVSVHLAPGSKFDFQKYIKRSLEDDFKVVVGISIPLWGSVVLFLLVNVHGWHAAFWVSFLPLLV  
ILAVGTKLQAIITRMALDIKERHAVVQGIPLVQVSDKYFWFAWPQLVLYLIHYVLFQNAFELTYFWWTWYEFGWASCFYE  
DDKLMIVRVALGLGAQVCSYVTLPLIALVLTQMGSTMKKSIFDDQTSKALKQWHKNALKKKTSKGRQETRTLGGSPGEHT  
PGHSSPHHPHDKDEMASQTATIVTSVDNETYDKRDLLSGP

>VrMLO9 JJMO01000121

MSGGGEGESLEFTPTWVVAVCTVIVAIISLAAERFLHFGGKYLKAKDQKPLYEALQKIKEELMLLGFISLLLITVTQNGI  
TKICVPPAFTRHMLPCLDLAPKHESHQTFYFPGTPRRLAATAAEHAPPHSEAEATETGTETGFCARKNKVPLLSVEA  
LHLLHIFIFVLAVVHVAFSVLTVVFGGARIRQWKHWEDSIKKNYETDRVLKPKVTNVQQHDFIRGRFSGFGKDSAIVGW  
MISFSKQFYGSVTKSDYVTLRHGFIMTHCKSNPKFNFKYMIIRALEDDFKQVVGISWYLVLFVVIIFLLNINWHTYFWI  
AFIPVILLAVGTKLEHVITQLAHEVAEKHAAIEGDLVVQPSDEHFWFHRPRVFLFLIHFILFQNAFEIAFFFWIIVVTYG

FDSCIMGQVRYIIPRLVIGVFIQVLCSTLPLYAIVTQMGTHYKRAIFNEHLQHNIVGWAQKAKKRKELKADGRPGQGS  
SQESANTGIQLGSIFTKKASAPGDTSSAPKDDGTS

>VrMLO10 JJMO01000123

MSVSKYKILSLCLVSWLWCGYVAVASSESSIGSKDLDTPTWAVACVCTVFILISLTLEKSLHKVGTWLHEKHKKALLEA  
LEKVKAEMLMILGFLSLLTTFGQSYIVRICIPTDIADKLLPCPLAGTEEESSSEEEHRRKLLSYERRYLSGDATNYQCKKG  
QQPLISVNGLHQLHILIFFLAVLHVIFYSAVTMLLGRKIRGWKAWEEETSSHGYEFANDPSRFRLTHETSFVRAHASFWT  
RYSIFFYIGCFRQFYRSVGKADYLALRNGFITVHLAPGSKFNFQYIKRSLEDDFKVVVGVSPILWASFVFLLLNVNG  
WHAMFWASLIPVVIILAVGTKLQVALAKMAIETTERHAVVQGIPLVQGSDFWFVGRPQLVLHLIHFALFQNAFQITYFL  
WIWYSFGLKNCFHADYKLAIVKVALGLAALCLCSYITLPLYALVTQMGSRMKSIFDEQTSKALKKWHMAVKKKQGVKLG  
NSKVRAMDGSTTDSTVHSSGPKLHRFKTTGHSTRTMSAYDDDHSDIELSPVSPTANLIVRVDHDEHEAEAEHPTANNQ  
ELSRPLTLERSMK

>VrMLO11 JJMO01000128

MGEVLQRKLETTPTWAVAVVCFVMLAISILIEHIEELGKWLKKKHKALHEALEKVKGELMLLGFISLLLTVFEDRIT  
SICISESVASTWNPDPDYKSKGPEGYIDKCAQKDKGVAFISEYGIHQLHIFVFLAIFHILQCIMTLTLGRTKMSIWR  
KWEDETKSLEHQFYHDPERFRFARDTTFGRRLNSWSRSPISLWIVSFCRQFYGSVNVKVDYMALRHGFIVAHLTPASETK  
FDFQNYIKRTLDEDFAVVVGISPTIWFVAVLILLTNTNGWYSYLWLPFIPLIIILLVGTQLQMIITDMALRIQDRGEVVK  
GAPVVEPGDELFWFSRPLVFLIHLVLFQNAFQLAFFAWSTYDNKFKINNCFHRTTEDIVIRLTMGVLTQVLCSTYVTLPL  
LYALVTQMGSTMKPIIFKDNVASALKNWHHTAKKHLKHNKDDSTSNTPFSSRPGTPTHGMSPVHLLHMHPRHSDSPLVSPR  
ASNYENGQWDVEGSHSPSHHARDVDHEESMMMOPQAAELPPSGPNPIRTQHEINIALSEFSFGRGHNPRADEY

>VrMLO12 JJMO01000129

MGGGGGEEGNNLEFPTWVAVVCSVIVAASFAAERFLHYGGTFLKKKNQKPLYEALLKIKEELMLLGFISLLLTVTQN  
GILKICVPEGWTHHMLPCSLKDKKEKESAKLTEHFQTFFSHSHIPATVRHLLADNEDHQPTAAEKLGHCAKKGVPLLSV  
EALHHLHIFIFVLAIVHVTFCVLTVVFGGLKIRQWKHWENSIGDQINGTPDLESTVTHVREHAFIQNRFTGFGEKSTVLG  
WVKSFFKQFYGSVTKLDYVTLRLGFIIMTHCRGNPKFNFHKYMIRALEDDFKKVVGISWYLVWIFVVIFFLLLNINGWHTYFW  
ISFVPLILLAVGTKLEHVIQLAHEVAEKHTAIEGELVVQPRDDHFWFHRPHIVLFLIHFILFQNAFEIAFFFFWILFTY  
GFDSCIMGRVRYIIPRLVIGVFIQVLCSTLPLYAIVTQMGTHFKKAIQFDEQVQARLVGWAQKAKKKGLRGDSNAQSAQ  
GSAQVGAGIQLGAVFRRASAPEENVIVPTNEGHQ

>VrMLO13 JJMO01000320

MAEVLQQGRSLAETPTYSVASVAVMVFVCLLVERSIIYRFGEWLRKTRRKALFASLEKLKEELMLLGLISLLLAQSARWI  
SEICVNSSLFSSRFYICSEQDLINENIMLESSSIPGETSIPKGLNTGAFNQCCEGHEPFVSYEGLEQLHRFLFVLGIT  
HVLYSCLAVGLAMSKIYSWRWENQARMPDGNQQAKKIKLMKRQTTFFIHRTSHPWSRSPILNWMCLFLRQFRSSIRKS  
DYLALRLGFITEHKLPLSYNFHQYMVRSMEDEFQGILGISWLLWIYAIVCIFVNIHGLNIYFWLSFIPAILVMLIGAKLQ  
HVVSTLALIMEQTGPFPRTPQVPRDDLFWFKPDILLWLIQFVIFQNAFEMATFIWTLWGFQEKSCFMRNHYMIIIRLA  
SGAIVQFWCSYMTVPLNIIVCQMGSRCKALVAESVRESLHWSCKRVKHKSKHDSLHSHTARSVCSTLESTIDERDEITVA  
SGTLTRSSSLASLNQITVSSVDQLNFETPNKAKDSIKVAGCLSGSVHTNPPQPSHNVEDRVNGEAEAKAITLLDLFQKT

>VrMLO14 JJMO01000320

MAEELNHSLEYTPTWIVAVVCCIIVFISLCLVERALHKLGNLKRKGQKALYEVLTKLEEELMLLGFISLLLTVFQGLISE  
ICISPNLATQMLPCKRPHRSSEGSAAHYQIYDAIINRRRLSSGSGSDHCTHKGKVPLLSLESLHQLHIFIFVLAHVHAI  
FCVTTMLLAGAKMREWKVWEDYRDRHSEAIKHEFFKEKSRGHRKAAVISWLMSSFFKQFHGSVTKYDYALRYGFIKKH  
HSNNLKYNFHNYMLRTLEVDKRVVGISWYLVWVFLVLLNIEGWHTYFWLAFPLIILLVGALEHIIARLYQDSVD  
MLGRDDDKLVKPSDEYFWFTSPLLVLHLLHFILFQNSFEIAFFFFWIWCTYGFDSIMEKVAYVPIPRIMGVIVQVLCSTY  
TLPLYTIVTQMGSEIKPQKLLSSDSLNTPHSNCMIKESTQTDEQAIMVEDATSAIELVPLEKPNTS

>VrMLO15 JJMO01000319

MAASEGSSSRELDQPTWAVAVVCTVFILISMALEKSLHKVGTWLGKKQKALLEALEKVKAEMLMILGFISLLTTFGQS  
YIVKICIEKLADNMLPCPYKYKDAEKASDDGEKRRKLLSYERRYLAADTTSFKCSNEGHEPLLSVNGLHQLHILIFFL  
AVFHVLYSAITMLLGRKIRGWKAWAEETSTNNFEFANAASRFRLTHETSFVRAHADLWTRIPIFFYIGCFRQFYRSVT  
KTDYQTLRNGFITVHLAPGSKFNFQYIKRSFEDDFKVVVGVSPVLWASVVVYLLVNVNGWRTTLWAAAIPVVIILAVGT  
KLQAILAKMAIETDRHAVVQGIPLVQGSDFWFVGRPQLVLHLIHFALFQNAFQVTYILWIWYSFGRVNCFRNDYKLA  
MKVALGIVMLCLCSYITLPLYALVTQMGSRMKAIFDEQTNKALRNWHMAVKKKQVVKLGKFNESVDGSPAASSAVH  
PSGPTLHRFKTTGHSTRSQSYEDQDHEYESDVELSPELSQTASFIVRMDHADHQQLQEHEHSEETNSSEAEFSFKPSD  
LVEKPPHSL

>VrMLO16 JJMO01000319

MGEENGEGRSLADTPTYAVATVITVLSFSFLFQGTLLKLVKWLDRTRKSLLSALEKIKEELMLFGLLSLLMGHWIIFV  
AKICVKSSVISSRFPCPLEKNSVSRVWLSSEYSNRVTVKGVNNGLRNYCPEGHESLASYESLEQLHRFVFLVGVTHV  
TYSFLAVALAMIKIYSWRWENEAKTIAVQSIQDTSQSTTSIRLRLNTFVHHTSHPWSSHKILVWLLCFSRQFWSSIH  
RADYMLRLGFIITNHDLPITYDFHNYMLRSMDEEFRDIVGVSLLWVYAICIFLNFHGSNFYFWLSFVPAIILILIGTK  
LHRVVVKLAVEIINRCPNMKPHQFNLRDELFWFGKPRFLRLIQLISFLNAFEMATFLWSLWEIKDPSCFMNRTFIVIR

LSFGVISQVWCSFITFPLYVIITQMGSRFKKTVVSENVKSLKQRRVKERQSYSSALLTATSTASISSFICGNERGLM  
TEEGSSSGTKDICLSYLDHVSRTQADASFPSYENDPHDIIHDSSPPLS

>VrMLO17 JJMO01000831

MAEEKIYKRSLEETPTWAFVAVCFVLLAISIIIEHVIHAIGKWFKKKHKKSALYESLEKVKGELMMLGFLSMLLTVFQAPV  
SKICISKNAASTWNPCSNPKAISNSNATSATIDRKLQYLDPMRRTLAAKSYDKCADQGKVAFVSAYGIHQLHIFIFVL  
AIFHIIQCIVILALGRTKMRRWKKWEDETKTIEYEFYNDPERFRLAKDTTFGQRHLNTWSQSSISLRIVSFFRQFSGSVK  
KVDYFALRHGFIMAHLAGSDTRFDHFKYIKRSLDEDFKVVVGISPIIWFVVLFLLTNTHGWYSYYWLPFVPLVTILIV  
GAKLQMIITKMGLMIEDKGVVKGAPVVEPGDDLFWFNRPRLLLFVIQFVLFQNAFQLAHFAWSIYEFSMKSCFHKTAD  
SMIRLTTGVVIQVLC SYVTLPYALVTQMGSSLKPTIFNDRVAAALKKWHHTSKKHVKHRKHYEAKNFSPFSSKSSTPTV  
GMSPIHLLHGHAPGRSDSARTSPRNSNYENECDVQGESS

>VrMLO18 JJMO01001841

MDNNEQETRSLALPTWSVATVLTVFVAVSLLVERSIRLSNWLKTNRKPLLALEKMKKEELMLLGFISLLLTATSRMI  
ANICIPSKFYNSAFAPCTRSQIDEQMEENGSEKRKLWMA SAYHVSGRMLNGINRSTCKEGYEPFVS YEGLEQLHRFIFVM  
AVTHISYSCLTMLLAIVKIH SWRVWEDEAHMDRRDLS EITRELTMRQSTFVKSHLSNPLFKNSSLIWVLQTCFFRQFA  
HSVVRADYLT LRKGFIMNHLSLKYDFHSYMVRSMEEEFQRIVGVSGPLWGFVVGFMFNKGSNLYFWIAIIPVSLVLL  
VGTKLQHV IATLAL ENAGIAGFFPEAKLRPRDELFWFNKPELLLSLIHFILFQNAFELASFFWFWWQFGYDSCFIRNLLL  
LYLR LILGFAGQFLCSYSTLPYALVTQMG TNYKAALIPQRIRET IHGWGKAARRKRKHGMFPDDSTIHTDTSTVLSIEE  
DDQLIDAPEVELQP VNAVSTSTPSPIANETSSRVATPLLRPSASISSAHSSSKAEVILRCSSMPSGR
